# Supplementary material for: Elucidating metabolic tuning of mixed purple phototrophic bacteria biofilms in photoheterotrophic conditions through microbial photo-electrosynthesis
Source: Research Square preprint supplement (doi:10.21203/rs.3.rs-2467581/v1), 2023-06-26
Supplement: Supplementary file 1 [file 6c4845a9924699f63f190b04.xlsx]

## Sheet: R. faecalis
ID_PROT	species	# peptides	Name	0,4V/0V norm	p value
tr|A0A318TJ74|A0A318TJ74_9BRAD	9BRAD	10	Phosphoenolpyruvate carboxykinase (ATP) OS=Rhodopseudomonas faecalis OX=99655 GN=pckA PE=3 SV=1	1.53509	0.00997942
tr|A0A318TGI6|A0A318TGI6_9BRAD	9BRAD	5	Fructose-1,6-bisphosphatase class 1 OS=Rhodopseudomonas faecalis OX=99655 GN=fbp PE=3 SV=1	0.688533	5.80877e-05
tr|A0A318TV31|A0A318TV31_9BRAD	9BRAD	2	Fructose-1,6-bisphosphatase OS=Rhodopseudomonas faecalis OX=99655 GN=BJ122_10630 PE=3 SV=1	1.80013	0.0030647
tr|A0A318TE67|A0A318TE67_9BRAD	9BRAD	4	Phosphoglycerate kinase OS=Rhodopseudomonas faecalis OX=99655 GN=pgk PE=3 SV=1	1.40255	0.0234991
tr|A0A318TVC6|A0A318TVC6_9BRAD	9BRAD	6	Ribulose bisphosphate carboxylase OS=Rhodopseudomonas faecalis OX=99655 GN=cbbM PE=3 SV=1	1.63134	0.00438024
tr|A0A318TM06|A0A318TM06_9BRAD	9BRAD	2	Enolase OS=Rhodopseudomonas faecalis OX=99655 GN=eno PE=3 SV=1	1.75711	0.00274528
tr|A0A318TIA3|A0A318TIA3_9BRAD	9BRAD	2	Cytochrome b OS=Rhodopseudomonas faecalis OX=99655 GN=BJ122_10357 PE=3 SV=1	1.9145	0.00343727
tr|A0A318TGN9|A0A318TGN9_9BRAD	9BRAD	1	Cytochrome b pre-mRNA-processing protein 3 OS=Rhodopseudomonas faecalis OX=99655 GN=BJ122_10581 PE=3 SV=1	0.280704	0.0438648
tr|A0A318TD31|A0A318TD31_9BRAD	9BRAD	6	Cytochrome c OS=Rhodopseudomonas faecalis OX=99655 GN=BJ122_110128 PE=4 SV=1	2.69376	4.85071e-06
tr|A0A318TNY1|A0A318TNY1_9BRAD	9BRAD	2	Porin OS=Rhodopseudomonas faecalis OX=99655 GN=BJ122_10686 PE=3 SV=1	2.34084	0.0245867
tr|A0A318TR75|A0A318TR75_9BRAD	9BRAD	2	Ubiquinol-cytochrome c reductase iron-sulfur subunit OS=Rhodopseudomonas faecalis OX=99655 GN=BJ122_10358 PE=3 SV=1	1.47307	0.0885204
tr|A0A318TN21|A0A318TN21_9BRAD	9BRAD	3	Ubiquinol-cytochrome c reductase iron-sulfur subunit OS=Rhodopseudomonas faecalis OX=99655 GN=BJ122_10371 PE=3 SV=1	0.906336	0.364283
tr|A0A318TA66|A0A318TA66_9BRAD	9BRAD	3	3-oxoacyl-[acyl-carrier-protein] reductase /acetoacetyl-CoA reductase OS=Rhodopseudomonas faecalis OX=99655 GN=BJ122_12153 PE=3 SV=1	1.89905	8.33751e-05
tr|A0A318TI97|A0A318TI97_9BRAD	9BRAD	4	Acetyl-CoA C-acetyltransferase OS=Rhodopseudomonas faecalis OX=99655 GN=BJ122_103226 PE=3 SV=1	0.81389	0.165628
tr|A0A318TGV6|A0A318TGV6_9BRAD	9BRAD	3	Acetyl-CoA C-acetyltransferase OS=Rhodopseudomonas faecalis OX=99655 GN=BJ122_10832 PE=3 SV=1	0.459773	0.00031831
tr|A0A318TTW6|A0A318TTW6_9BRAD	9BRAD	1	Acetyl-CoA C-acetyltransferase/acetyl-CoA acyltransferase OS=Rhodopseudomonas faecalis OX=99655 GN=BJ122_1084 PE=3 SV=1	0.41701	0.188451
tr|A0A318TQH8|A0A318TQH8_9BRAD	9BRAD	1	Acyl-CoA dehydrogenase OS=Rhodopseudomonas faecalis OX=99655 GN=BJ122_11631 PE=3 SV=1	1.12498	0.59929
tr|A0A318TB17|A0A318TB17_9BRAD	9BRAD	3	Acyl-CoA dehydrogenase OS=Rhodopseudomonas faecalis OX=99655 GN=BJ122_13210 PE=3 SV=1	0.952293	0.84084
tr|A0A318U0E2|A0A318U0E2_9BRAD	9BRAD	1	Enoyl-CoA hydratase OS=Rhodopseudomonas faecalis OX=99655 GN=BJ122_101118 PE=4 SV=1	0.287759	0.0109056
tr|A0A318TLU6|A0A318TLU6_9BRAD	9BRAD	1	Enoyl-CoA hydratase OS=Rhodopseudomonas faecalis OX=99655 GN=BJ122_10262 PE=3 SV=1	1.42818	0.1649
tr|A0A318TSQ1|A0A318TSQ1_9BRAD	9BRAD	2	Enoyl-CoA hydratase OS=Rhodopseudomonas faecalis OX=99655 GN=BJ122_11015 PE=4 SV=1	0.608205	0.0276893
tr|A0A318THD2|A0A318THD2_9BRAD	9BRAD	2	Enoyl-CoA hydratase/carnithine racemase OS=Rhodopseudomonas faecalis OX=99655 GN=BJ122_12528 PE=3 SV=1	0.948122	0.763829
tr|A0A318TJM4|A0A318TJM4_9BRAD	9BRAD	9	Phasin OS=Rhodopseudomonas faecalis OX=99655 GN=BJ122_10249 PE=4 SV=1	1.20122	0.378292
tr|A0A318TFD2|A0A318TFD2_9BRAD	9BRAD	3	Phasin OS=Rhodopseudomonas faecalis OX=99655 GN=BJ122_11157 PE=4 SV=1	2.74088	0.000227433
tr|A0A318T932|A0A318T932_9BRAD	9BRAD	1	3-oxoacyl-[acyl-carrier protein] reductase OS=Rhodopseudomonas faecalis OX=99655 GN=BJ122_12527 PE=4 SV=1	3.10077	6.7693e-05
tr|A0A318TI59|A0A318TI59_9BRAD	9BRAD	10	Pyruvate-ferredoxin/flavodoxin oxidoreductase OS=Rhodopseudomonas faecalis OX=99655 GN=BJ122_103186 PE=3 SV=1	1.45514	0.005473
tr|A0A318TQ69|A0A318TQ69_9BRAD	9BRAD	5	Pyruvate, orthophosphate dikinase OS=Rhodopseudomonas faecalis OX=99655 GN=BJ122_10463 PE=3 SV=1	1.26156	0.251993
tr|A0A318TKR2|A0A318TKR2_9BRAD	9BRAD	3	Citrate synthase OS=Rhodopseudomonas faecalis OX=99655 GN=BJ122_101151 PE=3 SV=1	1.24156	0.212952
tr|A0A318TLX9|A0A318TLX9_9BRAD	9BRAD	4	Citrate synthase OS=Rhodopseudomonas faecalis OX=99655 GN=BJ122_101226 PE=3 SV=1	0.956766	0.818783
tr|A0A318TI19|A0A318TI19_9BRAD	9BRAD	2	2-oxoglutarate ferredoxin oxidoreductase alpha subunit OS=Rhodopseudomonas faecalis OX=99655 GN=BJ122_10329 PE=4 SV=1	1.33235	0.160362
tr|A0A318TMY2|A0A318TMY2_9BRAD	9BRAD	1	2-oxoglutarate ferredoxin oxidoreductase subunit gamma OS=Rhodopseudomonas faecalis OX=99655 GN=BJ122_10331 PE=4 SV=1	0.748631	0.566589
tr|A0A318TK44|A0A318TK44_9BRAD	9BRAD	1	(R)-citramalate synthase OS=Rhodopseudomonas faecalis OX=99655 GN=BJ122_102312 PE=3 SV=1	0.297469	1.33316e-05
tr|A0A318U076|A0A318U076_9BRAD	9BRAD	3	10 kDa chaperonin OS=Rhodopseudomonas faecalis OX=99655 GN=groS PE=3 SV=1	2.22331	8.51186e-05
tr|A0A318TEV8|A0A318TEV8_9BRAD	9BRAD	1	16S rRNA (Cytosine967-C5)-methyltransferase OS=Rhodopseudomonas faecalis OX=99655 GN=BJ122_107155 PE=3 SV=1	0.924746	0.851162
tr|A0A318TUC7|A0A318TUC7_9BRAD	9BRAD	2	1-deoxy-D-xylulose 5-phosphate reductoisomerase OS=Rhodopseudomonas faecalis OX=99655 GN=dxr PE=3 SV=1	0.396697	0.001304
tr|A0A318TD48|A0A318TD48_9BRAD	9BRAD	2	1-deoxy-D-xylulose-5-phosphate synthase OS=Rhodopseudomonas faecalis OX=99655 GN=dxs PE=3 SV=1	0.987158	0.973734
tr|A0A318T6Z1|A0A318T6Z1_9BRAD	9BRAD	1	2,3,4,5-tetrahydropyridine-2,6-dicarboxylate N-succinyltransferase OS=Rhodopseudomonas faecalis OX=99655 GN=dapD PE=3 SV=1	1.21674	0.283009
tr|A0A318TBU7|A0A318TBU7_9BRAD	9BRAD	1	2,3-bisphosphoglycerate-dependent phosphoglycerate mutase OS=Rhodopseudomonas faecalis OX=99655 GN=gpmA PE=3 SV=1	1.14989	0.189688
tr|A0A318TNR0|A0A318TNR0_9BRAD	9BRAD	1	2-dehydro-3-deoxyphosphooctonate aldolase OS=Rhodopseudomonas faecalis OX=99655 GN=kdsA PE=3 SV=1	0.720915	0.253231
tr|A0A318TEE2|A0A318TEE2_9BRAD	9BRAD	1	2Fe-2S ferredoxin OS=Rhodopseudomonas faecalis OX=99655 GN=BJ122_12021 PE=3 SV=1	1.77194	0.0175362
tr|A0A318TK56|A0A318TK56_9BRAD	9BRAD	1	2-isopropylmalate synthase OS=Rhodopseudomonas faecalis OX=99655 GN=leuA PE=3 SV=1	0.318296	0.00437291
tr|A0A318TKK7|A0A318TKK7_9BRAD	9BRAD	6	2-methylcitrate dehydratase OS=Rhodopseudomonas faecalis OX=99655 GN=BJ122_101150 PE=3 SV=1	0.998022	0.99108
tr|A0A1H8UFK0|A0A1H8UFK0_9BRAD	9BRAD	1	2-methylcitrate dehydratase OS=Rhodopseudomonas pseudopalustris OX=1513892 GN=SAMN05444123_10714 PE=3 SV=1	1.89543	0.0206446
tr|A0A318TGE3|A0A318TGE3_9BRAD	9BRAD	2	2-octaprenyl-3-methyl-6-methoxy-1,4-benzoquinol hydroxylase OS=Rhodopseudomonas faecalis OX=99655 GN=BJ122_10533 PE=3 SV=1	0.576086	0.0814191
tr|A0A318TKJ8|A0A318TKJ8_9BRAD	9BRAD	2	2-octaprenyl-6-methoxyphenol hydroxylase /2-octaprenyl-3-methyl-6-methoxy-1,4-benzoquinol hydroxylase OS=Rhodopseudomonas faecalis OX=99655 GN=BJ122_11277 PE=3 SV=1	0.527937	0.0360203
tr|A0A318TCR5|A0A318TCR5_9BRAD	9BRAD	1	2-octaprenylphenol hydroxylase OS=Rhodopseudomonas faecalis OX=99655 GN=BJ122_11212 PE=4 SV=1	0.751888	0.388957
tr|A0A318TBK3|A0A318TBK3_9BRAD	9BRAD	4	30S ribosomal protein S1 OS=Rhodopseudomonas faecalis OX=99655 GN=BJ122_11230 PE=3 SV=1	1.63196	0.00406802
tr|A0A318T8Y8|A0A318T8Y8_9BRAD	9BRAD	3	30S ribosomal protein S11 OS=Rhodopseudomonas faecalis OX=99655 GN=rpsK PE=3 SV=1	2.24853	5.87926e-05
tr|A0A318TAH9|A0A318TAH9_9BRAD	9BRAD	2	30S ribosomal protein S13 OS=Rhodopseudomonas faecalis OX=99655 GN=rpsM PE=3 SV=1	1.79331	0.0029639
tr|A0A318TCE2|A0A318TCE2_9BRAD	9BRAD	1	30S ribosomal protein S15 OS=Rhodopseudomonas faecalis OX=99655 GN=rpsO PE=3 SV=1	3.39964	0.00101765
tr|A0A318TAJ2|A0A318TAJ2_9BRAD	9BRAD	2	30S ribosomal protein S16 OS=Rhodopseudomonas faecalis OX=99655 GN=rpsP PE=3 SV=1	1.02805	0.871077
tr|A0A318TAD8|A0A318TAD8_9BRAD	9BRAD	1	30S ribosomal protein S17 OS=Rhodopseudomonas faecalis OX=99655 GN=rpsQ PE=3 SV=1	1.74027	8.54495e-05
tr|A0A318T9A5|A0A318T9A5_9BRAD	9BRAD	1	30S ribosomal protein S19 OS=Rhodopseudomonas faecalis OX=99655 GN=rpsS PE=3 SV=1	2.17786	0.000433585
tr|A0A318U0M4|A0A318U0M4_9BRAD	9BRAD	5	30S ribosomal protein S2 OS=Rhodopseudomonas faecalis OX=99655 GN=rpsB PE=3 SV=1	2.19858	1.58141e-06
tr|A0A318TN51|A0A318TN51_9BRAD	9BRAD	2	30S ribosomal protein S20 OS=Rhodopseudomonas faecalis OX=99655 GN=rpsT PE=3 SV=1	2.3785	0.00206398
tr|A0A0N1C4N5|A0A0N1C4N5_9BRAD	9BRAD	1	30S ribosomal protein S21 OS=Rhodopseudomonas sp. AAP120 OX=1523430 GN=rpsU PE=3 SV=1	1.63193	0.00867556
tr|A0A318TPS2|A0A318TPS2_9BRAD	9BRAD	2	30S ribosomal protein S3 OS=Rhodopseudomonas faecalis OX=99655 GN=rpsC PE=3 SV=1	1.27184	0.265879
tr|A0A318TLN4|A0A318TLN4_9BRAD	9BRAD	2	30S ribosomal protein S4 OS=Rhodopseudomonas faecalis OX=99655 GN=rpsD PE=3 SV=1	1.26697	0.233921
tr|A0A318THV6|A0A318THV6_9BRAD	9BRAD	5	30S ribosomal protein S6 OS=Rhodopseudomonas faecalis OX=99655 GN=rpsF PE=3 SV=1	1.89691	9.66138e-05
tr|A0A318TCT3|A0A318TCT3_9BRAD	9BRAD	2	30S ribosomal protein S7 OS=Rhodopseudomonas faecalis OX=99655 GN=rpsG PE=3 SV=1	2.14151	2.00826e-05
tr|A0A318TL74|A0A318TL74_9BRAD	9BRAD	4	30S ribosomal protein S9 OS=Rhodopseudomonas faecalis OX=99655 GN=rpsI PE=3 SV=1	1.53749	0.0123103
tr|A0A318T822|A0A318T822_9BRAD	9BRAD	1	3-hydroxydecanoyl-[acyl-carrier-protein] dehydratase OS=Rhodopseudomonas faecalis OX=99655 GN=fabA PE=3 SV=1	1.0017	0.99606
tr|A0A318TC20|A0A318TC20_9BRAD	9BRAD	5	3-isopropylmalate dehydratase large subunit OS=Rhodopseudomonas faecalis OX=99655 GN=leuC PE=3 SV=1	0.774579	0.0922046
tr|A0A318TE73|A0A318TE73_9BRAD	9BRAD	1	3-isopropylmalate dehydratase small subunit OS=Rhodopseudomonas faecalis OX=99655 GN=leuD PE=3 SV=1	1.26401	0.22877
tr|A0A318TBA6|A0A318TBA6_9BRAD	9BRAD	2	3-isopropylmalate dehydrogenase OS=Rhodopseudomonas faecalis OX=99655 GN=leuB PE=3 SV=1	0.923041	0.727264
tr|A0A318TFT1|A0A318TFT1_9BRAD	9BRAD	2	3-methylcrotonyl-CoA carboxylase alpha subunit OS=Rhodopseudomonas faecalis OX=99655 GN=BJ122_1063 PE=4 SV=1	0.607998	0.353793
tr|A0A318TNQ3|A0A318TNQ3_9BRAD	9BRAD	1	3-methylcrotonyl-CoA carboxylase beta subunit OS=Rhodopseudomonas faecalis OX=99655 GN=BJ122_1064 PE=4 SV=1	1.82663	0.00025877
tr|A0A318TD63|A0A318TD63_9BRAD	9BRAD	2	3-oxoacid CoA-transferase subunit A OS=Rhodopseudomonas faecalis OX=99655 GN=BJ122_11166 PE=4 SV=1	0.993828	0.973832
tr|A0A318TL49|A0A318TL49_9BRAD	9BRAD	1	3-oxoacid CoA-transferase subunit B OS=Rhodopseudomonas faecalis OX=99655 GN=BJ122_11165 PE=3 SV=1	1.17792	0.681061
tr|A0A318TFQ3|A0A318TFQ3_9BRAD	9BRAD	2	3-oxoacyl-[acyl-carrier-protein] reductase OS=Rhodopseudomonas faecalis OX=99655 GN=BJ122_107117 PE=3 SV=1	0.857421	0.710372
tr|A0A318T9K1|A0A318T9K1_9BRAD	9BRAD	2	3-oxoacyl-[acyl-carrier-protein] synthase I OS=Rhodopseudomonas faecalis OX=99655 GN=BJ122_12436 PE=3 SV=1	1.654	0.0191636
tr|A0A318TML2|A0A318TML2_9BRAD	9BRAD	1	3-oxoacyl-[acyl-carrier-protein] synthase II OS=Rhodopseudomonas faecalis OX=99655 GN=BJ122_102326 PE=3 SV=1	1.05611	0.8682
tr|A0A318TSJ7|A0A318TSJ7_9BRAD	9BRAD	3	3-phenylpropionate/trans-cinnamate dioxygenase ferredoxin reductase subunit OS=Rhodopseudomonas faecalis OX=99655 GN=BJ122_10240 PE=4 SV=1	0.835482	0.342255
tr|A0A318T8V5|A0A318T8V5_9BRAD	9BRAD	3	4-hydroxy-3-methylbut-2-en-1-yl diphosphate synthase (flavodoxin) OS=Rhodopseudomonas faecalis OX=99655 GN=ispG PE=3 SV=1	0.636044	0.0209988
tr|A0A318TA54|A0A318TA54_9BRAD	9BRAD	1	4-hydroxy-3-methylbut-2-enyl diphosphate reductase OS=Rhodopseudomonas faecalis OX=99655 GN=ispH PE=3 SV=1	0.483107	0.013491
tr|A0A318TJU8|A0A318TJU8_9BRAD	9BRAD	1	4-hydroxy-tetrahydrodipicolinate reductase OS=Rhodopseudomonas faecalis OX=99655 GN=dapB PE=3 SV=1	1.16215	0.566412
tr|A0A318TGF1|A0A318TGF1_9BRAD	9BRAD	3	4-hydroxy-tetrahydrodipicolinate synthase OS=Rhodopseudomonas faecalis OX=99655 GN=dapA PE=3 SV=1	0.738491	0.370459
tr|A0A318TPU3|A0A318TPU3_9BRAD	9BRAD	3	50S ribosomal protein L1 OS=Rhodopseudomonas faecalis OX=99655 GN=rplA PE=3 SV=1	0.980055	0.882138
tr|A0A318TEP0|A0A318TEP0_9BRAD	9BRAD	2	50S ribosomal protein L10 OS=Rhodopseudomonas faecalis OX=99655 GN=rplJ PE=3 SV=1	2.00735	0.00130073
tr|A0A318TCU3|A0A318TCU3_9BRAD	9BRAD	1	50S ribosomal protein L11 OS=Rhodopseudomonas faecalis OX=99655 GN=rplK PE=3 SV=1	1.45238	0.0333941
tr|A0A318TJ08|A0A318TJ08_9BRAD	9BRAD	2	50S ribosomal protein L13 OS=Rhodopseudomonas faecalis OX=99655 GN=rplM PE=3 SV=1	2.14747	0.000152991
tr|A0A318TIH5|A0A318TIH5_9BRAD	9BRAD	1	50S ribosomal protein L14 OS=Rhodopseudomonas faecalis OX=99655 GN=rplN PE=3 SV=1	3.63429	5.19113e-06
tr|A0A318TAC7|A0A318TAC7_9BRAD	9BRAD	5	50S ribosomal protein L15 OS=Rhodopseudomonas faecalis OX=99655 GN=rplO PE=3 SV=1	1.97636	3.63637e-05
tr|A0A318TEL7|A0A318TEL7_9BRAD	9BRAD	3	50S ribosomal protein L16 OS=Rhodopseudomonas faecalis OX=99655 GN=rplP PE=3 SV=1	1.85951	0.018337
tr|A0A318TCQ3|A0A318TCQ3_9BRAD	9BRAD	2	50S ribosomal protein L17 OS=Rhodopseudomonas faecalis OX=99655 GN=rplQ PE=3 SV=1	2.65503	0.000120441
tr|A0A318TPR3|A0A318TPR3_9BRAD	9BRAD	2	50S ribosomal protein L18 OS=Rhodopseudomonas faecalis OX=99655 GN=rplR PE=3 SV=1	1.53522	0.00104982
tr|A0A318TJT9|A0A318TJT9_9BRAD	9BRAD	1	50S ribosomal protein L19 OS=Rhodopseudomonas faecalis OX=99655 GN=rplS PE=3 SV=1	1.17992	0.0731899
tr|A0A318T909|A0A318T909_9BRAD	9BRAD	3	50S ribosomal protein L2 OS=Rhodopseudomonas faecalis OX=99655 GN=rplB PE=3 SV=1	1.93659	0.000859859
tr|A0A318TR50|A0A318TR50_9BRAD	9BRAD	3	50S ribosomal protein L20 OS=Rhodopseudomonas faecalis OX=99655 GN=rplT PE=3 SV=1	1.37195	0.0346068
tr|A0A318T9L8|A0A318T9L8_9BRAD	9BRAD	3	50S ribosomal protein L21 OS=Rhodopseudomonas faecalis OX=99655 GN=rplU PE=3 SV=1	1.51658	0.000479335
tr|A0A318TCS1|A0A318TCS1_9BRAD	9BRAD	1	50S ribosomal protein L22 OS=Rhodopseudomonas faecalis OX=99655 GN=rplV PE=3 SV=1	2.89478	0.000139335
tr|A0A318TAK3|A0A318TAK3_9BRAD	9BRAD	1	50S ribosomal protein L23 OS=Rhodopseudomonas faecalis OX=99655 GN=rplW PE=3 SV=1	1.31138	0.0979666
tr|A0A318TA80|A0A318TA80_9BRAD	9BRAD	3	50S ribosomal protein L24 OS=Rhodopseudomonas faecalis OX=99655 GN=rplX PE=3 SV=1	2.02874	0.00108782
tr|A0A318TCP8|A0A318TCP8_9BRAD	9BRAD	8	50S ribosomal protein L25 OS=Rhodopseudomonas faecalis OX=99655 GN=rplY PE=3 SV=1	1.97652	2.94331e-05
tr|A0A318THV9|A0A318THV9_9BRAD	9BRAD	3	50S ribosomal protein L27 OS=Rhodopseudomonas faecalis OX=99655 GN=rpmA PE=3 SV=1	1.46838	0.0187774
tr|A0A318T941|A0A318T941_9BRAD	9BRAD	3	50S ribosomal protein L28 OS=Rhodopseudomonas faecalis OX=99655 GN=rpmB PE=3 SV=1	1.70792	0.0105265
tr|A0A318TCT5|A0A318TCT5_9BRAD	9BRAD	2	50S ribosomal protein L29 OS=Rhodopseudomonas faecalis OX=99655 GN=rpmC PE=3 SV=1	1.19892	0.44698
tr|A0A318TII5|A0A318TII5_9BRAD	9BRAD	2	50S ribosomal protein L3 OS=Rhodopseudomonas faecalis OX=99655 GN=rplC PE=3 SV=1	2.50247	1.70063e-07
tr|A0A318TCS5|A0A318TCS5_9BRAD	9BRAD	2	50S ribosomal protein L30 OS=Rhodopseudomonas faecalis OX=99655 GN=rpmD PE=3 SV=1	0.622045	0.0166167
tr|A0A318TIS1|A0A318TIS1_9BRAD	9BRAD	2	50S ribosomal protein L31 OS=Rhodopseudomonas faecalis OX=99655 GN=rpmE PE=3 SV=1	1.35056	0.168421
tr|A0A318TCF4|A0A318TCF4_9BRAD	9BRAD	1	50S ribosomal protein L32 OS=Rhodopseudomonas faecalis OX=99655 GN=rpmF PE=3 SV=1	0.728838	0.365412
tr|A0A318TFK8|A0A318TFK8_9BRAD	9BRAD	2	50S ribosomal protein L33 OS=Rhodopseudomonas faecalis OX=99655 GN=rpmG PE=3 SV=1	0.649939	0.442448
tr|A0A318TA93|A0A318TA93_9BRAD	9BRAD	1	50S ribosomal protein L4 OS=Rhodopseudomonas faecalis OX=99655 GN=rplD PE=3 SV=1	0.86226	0.492192
tr|A0A318TAJ1|A0A318TAJ1_9BRAD	9BRAD	2	50S ribosomal protein L5 OS=Rhodopseudomonas faecalis OX=99655 GN=rplE PE=3 SV=1	2.2344	3.86494e-06
tr|A0A318TCR3|A0A318TCR3_9BRAD	9BRAD	3	50S ribosomal protein L6 OS=Rhodopseudomonas faecalis OX=99655 GN=rplF PE=3 SV=1	1.8415	0.000448251
tr|A0A336JHF4|A0A336JHF4_9BRAD	9BRAD	1	50S ribosomal protein L6 OS=Rhodopseudomonas pentothenatexigens OX=999699 GN=rplF PE=3 SV=1	0.549237	0.232109
tr|A0A318TCV2|A0A318TCV2_9BRAD	9BRAD	1	50S ribosomal protein L7/L12 OS=Rhodopseudomonas faecalis OX=99655 GN=rplL PE=3 SV=1	0.3898	0.131939
tr|A0A318THJ9|A0A318THJ9_9BRAD	9BRAD	4	50S ribosomal protein L9 OS=Rhodopseudomonas faecalis OX=99655 GN=rplI PE=3 SV=1	1.58299	0.000123276
tr|A0A318TU72|A0A318TU72_9BRAD	9BRAD	20	5-methyltetrahydropteroyltriglutamate--homocysteine methyltransferase OS=Rhodopseudomonas faecalis OX=99655 GN=metE PE=3 SV=1	1.8293	0.00493536
tr|A0A318TVV1|A0A318TVV1_9BRAD	9BRAD	1	6,7-dimethyl-8-ribityllumazine synthase OS=Rhodopseudomonas faecalis OX=99655 GN=ribH PE=3 SV=1	2.37378	0.00466686
tr|A0A318TIB1|A0A318TIB1_9BRAD	9BRAD	6	60 kDa chaperonin OS=Rhodopseudomonas faecalis OX=99655 GN=groL PE=3 SV=1	2.0069	0.000470033
tr|A0A318TQK2|A0A318TQK2_9BRAD	9BRAD	3	60 kDa chaperonin OS=Rhodopseudomonas faecalis OX=99655 GN=groL PE=3 SV=1	1.20884	0.49498
tr|A0A1H8VUG6|A0A1H8VUG6_9BRAD	9BRAD	1	60 kDa chaperonin OS=Rhodopseudomonas pseudopalustris OX=1513892 GN=groL PE=3 SV=1	1.59842	0.0153003
tr|A0A318T9I4|A0A318T9I4_9BRAD	9BRAD	2	Acetolactate synthase OS=Rhodopseudomonas faecalis OX=99655 GN=BJ122_1232 PE=3 SV=1	1.31887	0.0203258
tr|A0A318TBZ1|A0A318TBZ1_9BRAD	9BRAD	6	Acetolactate synthase OS=Rhodopseudomonas faecalis OX=99655 GN=BJ122_1233 PE=3 SV=1	1.04939	0.672782
tr|A0A318T8N2|A0A318T8N2_9BRAD	9BRAD	2	Acetyl-CoA acetyltransferase OS=Rhodopseudomonas faecalis OX=99655 GN=BJ122_12152 PE=3 SV=1	4.20119	5.59658e-06
tr|A0A318TKH3|A0A318TKH3_9BRAD	9BRAD	3	Acetyl-CoA synthetase OS=Rhodopseudomonas faecalis OX=99655 GN=BJ122_101120 PE=4 SV=1	0.402641	0.0121096
tr|A0A318T7Y9|A0A318T7Y9_9BRAD	9BRAD	1	Acetyl-coenzyme A carboxylase carboxyl transferase subunit alpha OS=Rhodopseudomonas faecalis OX=99655 GN=accA PE=3 SV=1	2.79933	6.45985e-05
tr|A0A318TJ62|A0A318TJ62_9BRAD	9BRAD	5	Acetyl-coenzyme A synthetase OS=Rhodopseudomonas faecalis OX=99655 GN=acsA PE=3 SV=1	1.15013	0.218485
tr|A0A318TMT0|A0A318TMT0_9BRAD	9BRAD	3	Acetylglutamate kinase OS=Rhodopseudomonas faecalis OX=99655 GN=argB PE=3 SV=1	0.645366	0.0947176
tr|A0A318T7D8|A0A318T7D8_9BRAD	9BRAD	3	Acetylornithine aminotransferase OS=Rhodopseudomonas faecalis OX=99655 GN=argD PE=3 SV=1	1.14783	0.348226
tr|A0A318TJS6|A0A318TJS6_9BRAD	9BRAD	5	Aconitate hydratase OS=Rhodopseudomonas faecalis OX=99655 GN=BJ122_11440 PE=3 SV=1	0.909649	0.480159
tr|A0A318TFG3|A0A318TFG3_9BRAD	9BRAD	1	Acyl carrier protein OS=Rhodopseudomonas faecalis OX=99655 GN=acpP PE=3 SV=1	1.99701	0.0615114
tr|A0A318TNF5|A0A318TNF5_9BRAD	9BRAD	1	Acyl-CoA hydrolase OS=Rhodopseudomonas faecalis OX=99655 GN=BJ122_101149 PE=3 SV=1	0.875932	0.652517
tr|A0A318T8E0|A0A318T8E0_9BRAD	9BRAD	8	Adenosylhomocysteinase OS=Rhodopseudomonas faecalis OX=99655 GN=ahcY PE=3 SV=1	1.10635	0.209302
tr|A0A318TA69|A0A318TA69_9BRAD	9BRAD	2	Adenylate kinase OS=Rhodopseudomonas faecalis OX=99655 GN=adk PE=3 SV=1	1.20269	0.145558
tr|A0A318TJH8|A0A318TJH8_9BRAD	9BRAD	1	Adenylosuccinate lyase OS=Rhodopseudomonas faecalis OX=99655 GN=BJ122_1029 PE=3 SV=1	0.146866	0.00595427
tr|A0A318TJF3|A0A318TJF3_9BRAD	9BRAD	1	Adenylosuccinate synthetase OS=Rhodopseudomonas faecalis OX=99655 GN=purA PE=3 SV=1	1.62553	0.0976812
tr|A0A318TJR7|A0A318TJR7_9BRAD	9BRAD	2	AhpD family alkylhydroperoxidase OS=Rhodopseudomonas faecalis OX=99655 GN=BJ122_10427 PE=4 SV=1	1.01621	0.941072
tr|A0A318TZN1|A0A318TZN1_9BRAD	9BRAD	1	Alcohol dehydrogenase OS=Rhodopseudomonas faecalis OX=99655 GN=BJ122_102325 PE=4 SV=1	0.336422	0.260872
tr|A0A318TK87|A0A318TK87_9BRAD	9BRAD	3	Aldehyde dehydrogenase (NAD+) OS=Rhodopseudomonas faecalis OX=99655 GN=BJ122_10138 PE=4 SV=1	1.47935	0.017393
tr|A0A318TK42|A0A318TK42_9BRAD	9BRAD	3	Alkyl hydroperoxide reductase C OS=Rhodopseudomonas faecalis OX=99655 GN=BJ122_104157 PE=3 SV=1	1.6825	0.0109567
tr|A0A318TG50|A0A318TG50_9BRAD	9BRAD	1	Alpha-ketoglutarate dehydrogenase OS=Rhodopseudomonas faecalis OX=99655 GN=BJ122_11423 PE=3 SV=1	1.31631	0.300889
tr|A0A318TSS8|A0A318TSS8_9BRAD	9BRAD	1	Amidohydrolase OS=Rhodopseudomonas faecalis OX=99655 GN=BJ122_102131 PE=4 SV=1	0.32438	0.188527
tr|A0A318TLN8|A0A318TLN8_9BRAD	9BRAD	9	Amino acid ABC transporter substrate-binding protein (PAAT family) OS=Rhodopseudomonas faecalis OX=99655 GN=BJ122_101318 PE=3 SV=1	1.31112	0.0377334
tr|A0A318T9Z2|A0A318T9Z2_9BRAD	9BRAD	1	Amino acid ABC transporter substrate-binding protein (PAAT family) OS=Rhodopseudomonas faecalis OX=99655 GN=BJ122_12248 PE=3 SV=1	0.923326	0.752469
tr|A0A318TL13|A0A318TL13_9BRAD	9BRAD	1	Amino acid/amide ABC transporter ATP-binding protein 1 (HAAT family) OS=Rhodopseudomonas faecalis OX=99655 GN=BJ122_103171 PE=4 SV=1	0.132356	5.18469e-05
tr|A0A318TNB7|A0A318TNB7_9BRAD	9BRAD	1	Amino acid/amide ABC transporter ATP-binding protein 2 (HAAT family) OS=Rhodopseudomonas faecalis OX=99655 GN=BJ122_103172 PE=3 SV=1	1.00769	0.990989
tr|A0A318TYT5|A0A318TYT5_9BRAD	9BRAD	1	Amino acid/amide ABC transporter substrate-binding protein (HAAT family) OS=Rhodopseudomonas faecalis OX=99655 GN=BJ122_10214 PE=3 SV=1	1.14696	0.321197
tr|A0A318TYX3|A0A318TYX3_9BRAD	9BRAD	2	Amino acid/amide ABC transporter substrate-binding protein (HAAT family) OS=Rhodopseudomonas faecalis OX=99655 GN=BJ122_10254 PE=4 SV=1	0.923866	0.598942
tr|A0A318TIK0|A0A318TIK0_9BRAD	9BRAD	4	Amino acid/amide ABC transporter substrate-binding protein (HAAT family) OS=Rhodopseudomonas faecalis OX=99655 GN=BJ122_103168 PE=4 SV=1	2.43849	1.87101e-06
tr|A0A318TIY1|A0A318TIY1_9BRAD	9BRAD	6	Amino acid/amide ABC transporter substrate-binding protein (HAAT family) OS=Rhodopseudomonas faecalis OX=99655 GN=BJ122_10326 PE=3 SV=1	1.05812	0.656581
tr|A0A318TGU2|A0A318TGU2_9BRAD	9BRAD	2	Amino acid/amide ABC transporter substrate-binding protein (HAAT family) OS=Rhodopseudomonas faecalis OX=99655 GN=BJ122_10812 PE=4 SV=1	0.556666	0.0131698
tr|A0A318T9V8|A0A318T9V8_9BRAD	9BRAD	5	Amino acid/amide ABC transporter substrate-binding protein (HAAT family) OS=Rhodopseudomonas faecalis OX=99655 GN=BJ122_12272 PE=4 SV=1	1.91615	0.00214992
tr|A0A318T8Z8|A0A318T8Z8_9BRAD	9BRAD	5	Amino acid/amide ABC transporter substrate-binding protein (HAAT family) OS=Rhodopseudomonas faecalis OX=99655 GN=BJ122_12633 PE=4 SV=1	1.93911	0.000575805
tr|A0A318T788|A0A318T788_9BRAD	9BRAD	6	Amino acid/amide ABC transporter substrate-binding protein (HAAT family) OS=Rhodopseudomonas faecalis OX=99655 GN=BJ122_13317 PE=4 SV=1	1.00268	0.989284
tr|A0A318TAN8|A0A318TAN8_9BRAD	9BRAD	9	Amino acid/amide ABC transporter substrate-binding protein (HAAT family) OS=Rhodopseudomonas faecalis OX=99655 GN=BJ122_1375 PE=4 SV=1	1.39833	0.0786977
tr|A0A318TF62|A0A318TF62_9BRAD	9BRAD	1	Aminotransferase OS=Rhodopseudomonas faecalis OX=99655 GN=BJ122_10632 PE=3 SV=1	0.935534	0.55696
tr|A0A318TC38|A0A318TC38_9BRAD	9BRAD	4	Anaerobic Mg-protoporphyrin IX monomethyl ester oxidative cyclase OS=Rhodopseudomonas faecalis OX=99655 GN=BJ122_1119 PE=4 SV=1	1.54343	0.00484688
tr|A0A318TLH8|A0A318TLH8_9BRAD	9BRAD	1	Anthranilate phosphoribosyltransferase OS=Rhodopseudomonas faecalis OX=99655 GN=trpD PE=3 SV=1	0.82869	0.76904
tr|A0A318TCI9|A0A318TCI9_9BRAD	9BRAD	1	Apolipoprotein A1/A4/E domain-containing protein OS=Rhodopseudomonas faecalis OX=99655 GN=BJ122_12023 PE=4 SV=1	0.885623	0.806922
tr|A0A318TNQ5|A0A318TNQ5_9BRAD	9BRAD	1	Arginine--tRNA ligase OS=Rhodopseudomonas faecalis OX=99655 GN=argS PE=3 SV=1	1.89862	0.0265302
tr|A0A318TA84|A0A318TA84_9BRAD	9BRAD	1	Argininosuccinate synthase OS=Rhodopseudomonas faecalis OX=99655 GN=argG PE=3 SV=1	1.03608	0.815558
tr|A0A318T765|A0A318T765_9BRAD	9BRAD	2	Aspartate aminotransferase OS=Rhodopseudomonas faecalis OX=99655 GN=BJ122_13122 PE=4 SV=1	0.315633	0.00870261
tr|A0A318TBR9|A0A318TBR9_9BRAD	9BRAD	2	Aspartate-semialdehyde dehydrogenase OS=Rhodopseudomonas faecalis OX=99655 GN=asd PE=3 SV=1	0.721308	0.100968
tr|A0A318TEM7|A0A318TEM7_9BRAD	9BRAD	2	Aspartate--tRNA(Asp/Asn) ligase OS=Rhodopseudomonas faecalis OX=99655 GN=aspS PE=3 SV=1	1.19644	0.319733
tr|A0A318T8P0|A0A318T8P0_9BRAD	9BRAD	4	Aspartokinase OS=Rhodopseudomonas faecalis OX=99655 GN=BJ122_12162 PE=3 SV=1	0.396797	0.00214069
tr|A0A318TN57|A0A318TN57_9BRAD	9BRAD	1	ATP phosphoribosyltransferase OS=Rhodopseudomonas faecalis OX=99655 GN=hisG PE=3 SV=1	0.643916	0.105323
tr|A0A318T9D8|A0A318T9D8_9BRAD	9BRAD	2	ATP synthase epsilon chain OS=Rhodopseudomonas faecalis OX=99655 GN=atpC PE=3 SV=1	2.53129	3.97636e-05
tr|A0A318T966|A0A318T966_9BRAD	9BRAD	6	ATP synthase gamma chain OS=Rhodopseudomonas faecalis OX=99655 GN=atpG PE=3 SV=1	1.32428	0.0143108
tr|A0A318T9I3|A0A318T9I3_9BRAD	9BRAD	5	ATP synthase subunit alpha OS=Rhodopseudomonas faecalis OX=99655 GN=atpA PE=3 SV=1	1.3214	0.0208385
tr|A0A318TDC7|A0A318TDC7_9BRAD	9BRAD	2	ATP synthase subunit b OS=Rhodopseudomonas faecalis OX=99655 GN=atpF PE=3 SV=1	0.528506	0.105086
tr|A0A318THG8|A0A318THG8_9BRAD	9BRAD	6	ATP synthase subunit beta OS=Rhodopseudomonas faecalis OX=99655 GN=atpD PE=3 SV=1	1.46174	0.0609616
tr|A0A318THE5|A0A318THE5_9BRAD	9BRAD	1	ATP-dependent Clp protease ATP-binding subunit ClpA OS=Rhodopseudomonas faecalis OX=99655 GN=BJ122_10751 PE=3 SV=1	0.916277	0.769363
tr|A0A318TKZ0|A0A318TKZ0_9BRAD	9BRAD	5	ATP-dependent Clp protease ATP-binding subunit ClpX OS=Rhodopseudomonas faecalis OX=99655 GN=clpX PE=3 SV=1	0.898733	0.307061
tr|A0A318TF39|A0A318TF39_9BRAD	9BRAD	2	ATP-dependent protease ATPase subunit HslU OS=Rhodopseudomonas faecalis OX=99655 GN=hslU PE=3 SV=1	0.410062	0.0201421
tr|A0A318TAK9|A0A318TAK9_9BRAD	9BRAD	1	ATP-dependent protease subunit HslV OS=Rhodopseudomonas faecalis OX=99655 GN=hslV PE=3 SV=1	0.37784	0.130775
tr|A0A318T7X4|A0A318T7X4_9BRAD	9BRAD	1	ATP-dependent RNA helicase SUPV3L1/SUV3 OS=Rhodopseudomonas faecalis OX=99655 GN=BJ122_12535 PE=4 SV=1	1.8358	0.00596789
tr|A0A318TIL2|A0A318TIL2_9BRAD	9BRAD	4	ATP-dependent zinc metalloprotease FtsH OS=Rhodopseudomonas faecalis OX=99655 GN=ftsH PE=3 SV=1	0.76243	0.222064
tr|A0A318TKE8|A0A318TKE8_9BRAD	9BRAD	1	Bacterioferritin OS=Rhodopseudomonas faecalis OX=99655 GN=BJ122_102350 PE=3 SV=1	0.301881	0.177241
tr|A0A318T7H8|A0A318T7H8_9BRAD	9BRAD	1	Beta sliding clamp OS=Rhodopseudomonas faecalis OX=99655 GN=BJ122_1298 PE=3 SV=1	0.34606	1.69167e-05
tr|A0A318TR99|A0A318TR99_9BRAD	9BRAD	2	Beta-alanine--pyruvate transaminase OS=Rhodopseudomonas faecalis OX=99655 GN=BJ122_10388 PE=3 SV=1	0.939284	0.752304
tr|A0A318TL38|A0A318TL38_9BRAD	9BRAD	1	Beta-ketodecanoyl-[acyl-carrier-protein] synthase OS=Rhodopseudomonas faecalis OX=99655 GN=BJ122_103202 PE=4 SV=1	0.86046	0.744195
tr|A0A318TQC0|A0A318TQC0_9BRAD	9BRAD	1	Bifunctional enzyme IspD/IspF OS=Rhodopseudomonas faecalis OX=99655 GN=ispDF PE=3 SV=1	0.262635	2.47484e-05
tr|A0A318TDG3|A0A318TDG3_9BRAD	9BRAD	2	Bifunctional protein FolD OS=Rhodopseudomonas faecalis OX=99655 GN=folD PE=3 SV=1	0.493269	0.16704
tr|A0A318T8L9|A0A318T8L9_9BRAD	9BRAD	3	Bifunctional purine biosynthesis protein PurH OS=Rhodopseudomonas faecalis OX=99655 GN=purH PE=3 SV=1	0.877384	0.199392
tr|A0A318TJ00|A0A318TJ00_9BRAD	9BRAD	1	Biopolymer transport protein ExbB OS=Rhodopseudomonas faecalis OX=99655 GN=BJ122_10346 PE=3 SV=1	0.189182	0.0336887
tr|A0A318TFA0|A0A318TFA0_9BRAD	9BRAD	1	Biotin carboxyl carrier protein of acetyl-CoA carboxylase OS=Rhodopseudomonas faecalis OX=99655 GN=BJ122_10672 PE=4 SV=1	0.610013	0.0410523
tr|A0A318TF40|A0A318TF40_9BRAD	9BRAD	1	Biotin carboxylase OS=Rhodopseudomonas faecalis OX=99655 GN=BJ122_10673 PE=4 SV=1	0.370513	9.38419e-05
tr|A0A318TKC9|A0A318TKC9_9BRAD	9BRAD	11	C4-dicarboxylate-binding protein DctP OS=Rhodopseudomonas faecalis OX=99655 GN=BJ122_1018 PE=3 SV=1	1.2364	0.00641647
tr|A0A318T8A2|A0A318T8A2_9BRAD	9BRAD	2	Carbon-monoxide dehydrogenase medium subunit OS=Rhodopseudomonas faecalis OX=99655 GN=BJ122_13621 PE=4 SV=1	0.582242	0.0624986
tr|A0A318T729|A0A318T729_9BRAD	9BRAD	1	Carbon-monoxide dehydrogenase small subunit OS=Rhodopseudomonas faecalis OX=99655 GN=BJ122_13619 PE=4 SV=1	0.472377	0.0278199
tr|A0A318THI8|A0A318THI8_9BRAD	9BRAD	3	Catalase-peroxidase OS=Rhodopseudomonas faecalis OX=99655 GN=katG PE=3 SV=1	1.04672	0.79117
tr|A0A318TGK4|A0A318TGK4_9BRAD	9BRAD	1	Cell division coordinator CpoB OS=Rhodopseudomonas faecalis OX=99655 GN=cpoB PE=3 SV=1	0.214027	0.00110372
tr|A0A318TC87|A0A318TC87_9BRAD	9BRAD	1	Chaperone protein ClpB OS=Rhodopseudomonas faecalis OX=99655 GN=clpB PE=3 SV=1	2.97182	5.50918e-05
tr|A0A318TE80|A0A318TE80_9BRAD	9BRAD	1	Chaperone protein DnaJ OS=Rhodopseudomonas faecalis OX=99655 GN=dnaJ PE=3 SV=1	1.05896	0.875931
tr|A0A318TB09|A0A318TB09_9BRAD	9BRAD	2	Chaperone protein DnaK OS=Rhodopseudomonas faecalis OX=99655 GN=dnaK PE=2 SV=1	1.47105	0.00801158
tr|A0A318T840|A0A318T840_9BRAD	9BRAD	1	Chaperone protein HtpG OS=Rhodopseudomonas faecalis OX=99655 GN=htpG PE=3 SV=1	0.581514	0.0432949
tr|A0A318TFZ6|A0A318TFZ6_9BRAD	9BRAD	3	Chlorophyllide reductase iron protein subunit X OS=Rhodopseudomonas faecalis OX=99655 GN=BJ122_110114 PE=3 SV=1	0.806262	0.147168
tr|A0A318TI74|A0A318TI74_9BRAD	9BRAD	1	Chlorophyllide reductase subunit Y OS=Rhodopseudomonas faecalis OX=99655 GN=BJ122_110115 PE=4 SV=1	1.13791	0.770515
tr|A0A318TC70|A0A318TC70_9BRAD	9BRAD	1	Chromosome partitioning protein OS=Rhodopseudomonas faecalis OX=99655 GN=BJ122_11139 PE=4 SV=1	0.187424	0.0109103
tr|A0A318TBQ4|A0A318TBQ4_9BRAD	9BRAD	1	Chromosome segregation DNA-binding protein OS=Rhodopseudomonas faecalis OX=99655 GN=BJ122_11293 PE=3 SV=1	2.25562	0.00289952
tr|A0A318TAK8|A0A318TAK8_9BRAD	9BRAD	3	Citrate lyase subunit beta/citryl-CoA lyase OS=Rhodopseudomonas faecalis OX=99655 GN=BJ122_11468 PE=3 SV=1	0.961223	0.864403
tr|A0A318TB74|A0A318TB74_9BRAD	9BRAD	1	Citronellol/citronellal dehydrogenase OS=Rhodopseudomonas faecalis OX=99655 GN=BJ122_12927 PE=4 SV=1	0.286478	0.0305177
tr|A0A318TD83|A0A318TD83_9BRAD	9BRAD	1	Cobaltochelatase CobS subunit OS=Rhodopseudomonas faecalis OX=99655 GN=BJ122_12541 PE=4 SV=1	0.454343	0.370543
tr|A0A318TD64|A0A318TD64_9BRAD	9BRAD	2	Coproporphyrinogen-III oxidase OS=Rhodopseudomonas faecalis OX=99655 GN=BJ122_11111 PE=3 SV=1	0.786472	0.510781
tr|A0A318TND8|A0A318TND8_9BRAD	9BRAD	1	CreA protein OS=Rhodopseudomonas faecalis OX=99655 GN=BJ122_101129 PE=4 SV=1	1.15702	0.326799
tr|A0A318T9R4|A0A318T9R4_9BRAD	9BRAD	1	CRISPR-associated Csd1 family protein OS=Rhodopseudomonas faecalis OX=99655 GN=BJ122_12220 PE=4 SV=1	0.192947	0.0135308
tr|A0A318TC69|A0A318TC69_9BRAD	9BRAD	3	CRISPR-associated Csd2 family protein OS=Rhodopseudomonas faecalis OX=99655 GN=BJ122_12221 PE=4 SV=1	1.2843	0.18485
tr|A0A318TCV3|A0A318TCV3_9BRAD	9BRAD	1	CubicO group peptidase (Beta-lactamase class C family) OS=Rhodopseudomonas faecalis OX=99655 GN=BJ122_11954 PE=4 SV=1	0.130194	0.00396416
tr|A0A318TE38|A0A318TE38_9BRAD	9BRAD	5	CubicO group peptidase (Beta-lactamase class C family) OS=Rhodopseudomonas faecalis OX=99655 GN=BJ122_1216 PE=4 SV=1	0.918449	0.69567
tr|A0A318TAI3|A0A318TAI3_9BRAD	9BRAD	1	Cysteine synthase OS=Rhodopseudomonas faecalis OX=99655 GN=BJ122_11960 PE=3 SV=1	0.920636	0.776199
tr|A0A318T9W3|A0A318T9W3_9BRAD	9BRAD	8	Cytochrome-dependent sulfide dehydrogenase (Flavoprotein) OS=Rhodopseudomonas faecalis OX=99655 GN=BJ122_11654 PE=4 SV=1	1.39106	0.00597397
tr|A0A318TJE5|A0A318TJE5_9BRAD	9BRAD	5	D-3-phosphoglycerate dehydrogenase OS=Rhodopseudomonas faecalis OX=99655 GN=BJ122_11514 PE=3 SV=1	1.28627	0.0403554
tr|A0A318TPG9|A0A318TPG9_9BRAD	9BRAD	7	Delta-aminolevulinic acid dehydratase OS=Rhodopseudomonas faecalis OX=99655 GN=BJ122_10562 PE=3 SV=1	1.29442	0.022512
tr|A0A318TE82|A0A318TE82_9BRAD	9BRAD	3	Dihydrolipoyllysine-residue succinyltransferase component of 2-oxoglutarate dehydrogenase complex OS=Rhodopseudomonas faecalis OX=99655 GN=BJ122_11422 PE=3 SV=1	0.884937	0.645868
tr|A0A318TQ41|A0A318TQ41_9BRAD	9BRAD	1	Dihydroxy-acid dehydratase OS=Rhodopseudomonas faecalis OX=99655 GN=ilvD PE=3 SV=1	1.45455	0.261987
tr|A0A318TG34|A0A318TG34_9BRAD	9BRAD	3	D-methionine transport system substrate-binding protein OS=Rhodopseudomonas faecalis OX=99655 GN=BJ122_105149 PE=3 SV=1	2.69127	0.0052237
tr|A0A318TNI3|A0A318TNI3_9BRAD	9BRAD	2	DNA-binding protein HU-beta OS=Rhodopseudomonas faecalis OX=99655 GN=BJ122_101182 PE=3 SV=1	2.54392	4.33418e-05
tr|A0A318T985|A0A318T985_9BRAD	9BRAD	2	DNA-directed RNA polymerase subunit alpha OS=Rhodopseudomonas faecalis OX=99655 GN=rpoA PE=3 SV=1	2.25085	7.49768e-07
tr|A0A318TAF9|A0A318TAF9_9BRAD	9BRAD	16	DNA-directed RNA polymerase subunit beta OS=Rhodopseudomonas faecalis OX=99655 GN=rpoB PE=3 SV=1	1.2069	0.0223298
tr|A0A318TIJ5|A0A318TIJ5_9BRAD	9BRAD	12	DNA-directed RNA polymerase subunit beta' OS=Rhodopseudomonas faecalis OX=99655 GN=rpoC PE=3 SV=1	1.08466	0.156761
tr|A0A318TIX4|A0A318TIX4_9BRAD	9BRAD	2	DNA-directed RNA polymerase subunit omega OS=Rhodopseudomonas faecalis OX=99655 GN=rpoZ PE=3 SV=1	1.5818	0.0231178
tr|A0A318TCL3|A0A318TCL3_9BRAD	9BRAD	2	dTDP-4-amino-4,6-dideoxygalactose transaminase OS=Rhodopseudomonas faecalis OX=99655 GN=BJ122_12043 PE=3 SV=1	1.44412	0.19846
tr|A0A318TKA6|A0A318TKA6_9BRAD	9BRAD	3	DUF2059 domain-containing protein OS=Rhodopseudomonas faecalis OX=99655 GN=BJ122_102300 PE=4 SV=1	1.39926	0.196597
tr|A0A318TJU4|A0A318TJU4_9BRAD	9BRAD	1	DUF853 domain-containing protein OS=Rhodopseudomonas faecalis OX=99655 GN=BJ122_102130 PE=4 SV=1	0.506006	0.0371867
tr|A0A318TEB0|A0A318TEB0_9BRAD	9BRAD	1	Effector-binding domain-containing protein OS=Rhodopseudomonas faecalis OX=99655 GN=BJ122_11452 PE=4 SV=1	1.04087	0.763484
tr|A0A318T8U6|A0A318T8U6_9BRAD	9BRAD	3	Electron transfer flavoprotein alpha subunit apoprotein OS=Rhodopseudomonas faecalis OX=99655 GN=BJ122_12829 PE=3 SV=1	2.03082	0.000133255
tr|A0A318TGZ8|A0A318TGZ8_9BRAD	9BRAD	8	Electron transfer flavoprotein beta subunit OS=Rhodopseudomonas faecalis OX=99655 GN=BJ122_12828 PE=3 SV=1	1.46725	0.0348042
tr|A0A318TGV4|A0A318TGV4_9BRAD	9BRAD	2	Electron transfer flavoprotein-ubiquinone oxidoreductase OS=Rhodopseudomonas faecalis OX=99655 GN=BJ122_10479 PE=4 SV=1	1.03117	0.819873
tr|A0A318TGQ5|A0A318TGQ5_9BRAD	9BRAD	6	Elongation factor G OS=Rhodopseudomonas faecalis OX=99655 GN=BJ122_13125 PE=3 SV=1	1.32511	0.0121784
tr|A0A318TPT2|A0A318TPT2_9BRAD	9BRAD	12	Elongation factor G OS=Rhodopseudomonas faecalis OX=99655 GN=fusA PE=3 SV=1	1.21231	0.14994
tr|A0A318TEY1|A0A318TEY1_9BRAD	9BRAD	3	Elongation factor P OS=Rhodopseudomonas faecalis OX=99655 GN=efp PE=3 SV=1	1.52661	2.46035e-05
tr|A0A318TNL6|A0A318TNL6_9BRAD	9BRAD	7	Elongation factor Ts OS=Rhodopseudomonas faecalis OX=99655 GN=tsf PE=3 SV=1	1.39903	0.0615785
tr|A0A318TPV2|A0A318TPV2_9BRAD	9BRAD	6	Elongation factor Tu OS=Rhodopseudomonas faecalis OX=99655 GN=tuf PE=3 SV=1	1.98154	1.35544e-05
tr|A0A318THF6|A0A318THF6_9BRAD	9BRAD	1	Enamine deaminase RidA (YjgF/YER057c/UK114 family) OS=Rhodopseudomonas faecalis OX=99655 GN=BJ122_10761 PE=4 SV=1	0.326886	0.00195225
tr|A0A318TMM2|A0A318TMM2_9BRAD	9BRAD	5	Energy-dependent translational throttle protein EttA OS=Rhodopseudomonas faecalis OX=99655 GN=ettA PE=3 SV=1	0.667522	0.0019509
tr|A0A318TI42|A0A318TI42_9BRAD	9BRAD	2	Farnesyl-diphosphate synthase OS=Rhodopseudomonas faecalis OX=99655 GN=BJ122_12145 PE=3 SV=1	1.50603	0.215052
tr|A0A318TQ38|A0A318TQ38_9BRAD	9BRAD	1	Fatty-acyl-CoA synthase OS=Rhodopseudomonas faecalis OX=99655 GN=BJ122_10422 PE=4 SV=1	0.410385	0.00390527
tr|A0A318TPC0|A0A318TPC0_9BRAD	9BRAD	1	Fatty-acyl-CoA synthase OS=Rhodopseudomonas faecalis OX=99655 GN=BJ122_1217 PE=4 SV=1	0.902518	0.836242
tr|A0A318TA59|A0A318TA59_9BRAD	9BRAD	2	Ferredoxin--NADP reductase OS=Rhodopseudomonas faecalis OX=99655 GN=BJ122_12019 PE=3 SV=1	0.483113	0.0227554
tr|A0A318TSQ0|A0A318TSQ0_9BRAD	9BRAD	1	Ferritin-like metal-binding protein YciE OS=Rhodopseudomonas faecalis OX=99655 GN=BJ122_102100 PE=4 SV=1	2.83894	1.75158e-05
tr|A0A318TIC8|A0A318TIC8_9BRAD	9BRAD	1	Fe-S cluster assembly ATP-binding protein OS=Rhodopseudomonas faecalis OX=99655 GN=BJ122_10651 PE=3 SV=1	0.575522	0.027203
tr|A0A318TPC7|A0A318TPC7_9BRAD	9BRAD	2	Fe-S cluster biogenesis protein NfuA OS=Rhodopseudomonas faecalis OX=99655 GN=BJ122_12119 PE=4 SV=1	1.58658	0.000640103
tr|A0A318T9A3|A0A318T9A3_9BRAD	9BRAD	1	Fis family two component transcriptional regulator OS=Rhodopseudomonas faecalis OX=99655 GN=BJ122_12457 PE=4 SV=1	2.80336	2.02103e-05
tr|A0A318TBE8|A0A318TBE8_9BRAD	9BRAD	1	Flagellin OS=Rhodopseudomonas faecalis OX=99655 GN=BJ122_1272 PE=3 SV=1	0.87136	0.617659
tr|A0A318TEC1|A0A318TEC1_9BRAD	9BRAD	8	Flagellin-like hook-associated protein FlgL (Fragment) OS=Rhodopseudomonas faecalis OX=99655 GN=BJ122_1201 PE=4 SV=1	1.13164	0.322599
tr|A0A318T8V3|A0A318T8V3_9BRAD	9BRAD	1	Fumarate hydratase class I OS=Rhodopseudomonas faecalis OX=99655 GN=BJ122_12737 PE=3 SV=1	1.35326	0.406767
tr|A0A318TM70|A0A318TM70_9BRAD	9BRAD	3	G3E family GTPase OS=Rhodopseudomonas faecalis OX=99655 GN=BJ122_102186 PE=3 SV=1	0.454037	0.000252754
tr|A0A318TIJ1|A0A318TIJ1_9BRAD	9BRAD	2	Glucose-1-phosphate adenylyltransferase OS=Rhodopseudomonas faecalis OX=99655 GN=glgC PE=3 SV=1	0.494951	0.0726548
tr|A0A318TIG4|A0A318TIG4_9BRAD	9BRAD	5	Glutamate dehydrogenase OS=Rhodopseudomonas faecalis OX=99655 GN=BJ122_103181 PE=3 SV=1	1.00751	0.956502
tr|A0A318TIA8|A0A318TIA8_9BRAD	9BRAD	2	Glutamate synthase (NADH) large subunit OS=Rhodopseudomonas faecalis OX=99655 GN=BJ122_103236 PE=3 SV=1	0.691187	0.0126455
tr|A0A318TL61|A0A318TL61_9BRAD	9BRAD	4	Glutamate synthase (NADH) small subunit OS=Rhodopseudomonas faecalis OX=99655 GN=BJ122_103235 PE=4 SV=1	0.514785	0.0208046
tr|A0A318TLG0|A0A318TLG0_9BRAD	9BRAD	1	Glutamate--tRNA ligase OS=Rhodopseudomonas faecalis OX=99655 GN=gltX PE=3 SV=1	0.278746	0.00462056
tr|A0A318TNH2|A0A318TNH2_9BRAD	9BRAD	8	Glutamine synthetase OS=Rhodopseudomonas faecalis OX=99655 GN=BJ122_101170 PE=3 SV=1	1.30194	0.0410109
tr|A0A318THS6|A0A318THS6_9BRAD	9BRAD	1	Glutamyl-tRNA(Gln) amidotransferase subunit A OS=Rhodopseudomonas faecalis OX=99655 GN=gatA PE=3 SV=1	0.28094	0.00222682
tr|A0A318T6L8|A0A318T6L8_9BRAD	9BRAD	3	Glutaredoxin OS=Rhodopseudomonas faecalis OX=99655 GN=BJ122_1393 PE=3 SV=1	1.28023	0.153636
tr|A0A318TLW9|A0A318TLW9_9BRAD	9BRAD	1	Glutaryl-CoA dehydrogenase OS=Rhodopseudomonas faecalis OX=99655 GN=BJ122_10425 PE=3 SV=1	0.748414	0.158301
tr|A0A318TJF9|A0A318TJF9_9BRAD	9BRAD	2	Glutathione S-transferase OS=Rhodopseudomonas faecalis OX=99655 GN=BJ122_103228 PE=4 SV=1	0.680806	0.0149668
tr|A0A318TJG3|A0A318TJG3_9BRAD	9BRAD	2	Glutathione-dependent peroxiredoxin OS=Rhodopseudomonas faecalis OX=99655 GN=BJ122_11534 PE=3 SV=1	1.11581	0.492108
tr|A0A318TGE8|A0A318TGE8_9BRAD	9BRAD	5	Glyceraldehyde-3-phosphate dehydrogenase (NAD+) OS=Rhodopseudomonas faecalis OX=99655 GN=BJ122_10968 PE=3 SV=1	2.01314	0.000879547
tr|A0A318TDR2|A0A318TDR2_9BRAD	9BRAD	3	Glycogen operon protein OS=Rhodopseudomonas faecalis OX=99655 GN=BJ122_11070 PE=3 SV=1	1.00908	0.970069
tr|A0A318TRQ1|A0A318TRQ1_9BRAD	9BRAD	1	GMP synthase [glutamine-hydrolyzing] OS=Rhodopseudomonas faecalis OX=99655 GN=guaA PE=3 SV=1	0.794094	0.00139559
tr|A0A318TE33|A0A318TE33_9BRAD	9BRAD	2	GreA/GreB family elongation factor OS=Rhodopseudomonas faecalis OX=99655 GN=BJ122_109126 PE=4 SV=1	0.598762	0.0829376
tr|A0A318TAY0|A0A318TAY0_9BRAD	9BRAD	1	Helix-hairpin-helix protein OS=Rhodopseudomonas faecalis OX=99655 GN=BJ122_11446 PE=4 SV=1	0.72501	0.274733
tr|A0A318THF0|A0A318THF0_9BRAD	9BRAD	2	Hemerythrin-like domain-containing protein OS=Rhodopseudomonas faecalis OX=99655 GN=BJ122_11116 PE=4 SV=1	1.38592	0.000582188
tr|A0A318TQ80|A0A318TQ80_9BRAD	9BRAD	1	Hemolysin-activating ACP:hemolysin acyltransferase OS=Rhodopseudomonas faecalis OX=99655 GN=BJ122_11722 PE=3 SV=1	1.07914	0.755294
tr|A0A318TFC6|A0A318TFC6_9BRAD	9BRAD	1	HemY protein OS=Rhodopseudomonas faecalis OX=99655 GN=BJ122_11620 PE=4 SV=1	0.101913	0.00378538
tr|A0A318TPH0|A0A318TPH0_9BRAD	9BRAD	1	Heterodimeric methylmalonyl-CoA mutase small subunit OS=Rhodopseudomonas faecalis OX=99655 GN=BJ122_102124 PE=4 SV=1	0.510729	0.0873457
tr|A0A318TMY4|A0A318TMY4_9BRAD	9BRAD	1	Histidine phosphotransferase ChpT OS=Rhodopseudomonas faecalis OX=99655 GN=BJ122_13223 PE=4 SV=1	0.395921	0.0177876
tr|A0A318T8F7|A0A318T8F7_9BRAD	9BRAD	2	Histidinol-phosphate aminotransferase OS=Rhodopseudomonas faecalis OX=99655 GN=hisC PE=3 SV=1	0.588364	0.0707687
tr|A0A318TJX0|A0A318TJX0_9BRAD	9BRAD	3	HK97 family phage major capsid protein OS=Rhodopseudomonas faecalis OX=99655 GN=BJ122_102160 PE=4 SV=1	1.03426	0.888137
tr|A0A318TM39|A0A318TM39_9BRAD	9BRAD	1	HK97 family phage portal protein OS=Rhodopseudomonas faecalis OX=99655 GN=BJ122_102156 PE=4 SV=1	0.553687	0.0184618
tr|A0A318TIK2|A0A318TIK2_9BRAD	9BRAD	1	HlyD family secretion protein OS=Rhodopseudomonas faecalis OX=99655 GN=BJ122_10939 PE=4 SV=1	0.86248	0.520471
tr|A0A318TEL2|A0A318TEL2_9BRAD	9BRAD	2	Homospermidine synthase OS=Rhodopseudomonas faecalis OX=99655 GN=BJ122_109125 PE=4 SV=1	1.25353	0.34635
tr|A0A318TFY1|A0A318TFY1_9BRAD	9BRAD	4	Hydroxymethylbilane synthase OS=Rhodopseudomonas faecalis OX=99655 GN=BJ122_11094 PE=3 SV=1	1.05081	0.668067
tr|A0A318TL71|A0A318TL71_9BRAD	9BRAD	1	IclR family transcriptional regulator OS=Rhodopseudomonas faecalis OX=99655 GN=BJ122_111105 PE=4 SV=1	2.31012	0.0446935
tr|A0A318TFB6|A0A318TFB6_9BRAD	9BRAD	1	Inorganic pyrophosphatase OS=Rhodopseudomonas faecalis OX=99655 GN=ppa PE=3 SV=1	0.556443	0.0525057
tr|A0A318TUS8|A0A318TUS8_9BRAD	9BRAD	3	Inosine-5'-monophosphate dehydrogenase OS=Rhodopseudomonas faecalis OX=99655 GN=guaB PE=3 SV=1	1.93941	0.000594389
tr|A0A318TD85|A0A318TD85_9BRAD	9BRAD	2	Inositol-1-monophosphatase OS=Rhodopseudomonas faecalis OX=99655 GN=BJ122_10963 PE=3 SV=1	2.19259	0.000205986
tr|A0A318TL44|A0A318TL44_9BRAD	9BRAD	2	Integration host factor subunit alpha OS=Rhodopseudomonas faecalis OX=99655 GN=ihfA PE=3 SV=1	0.889743	0.536142
tr|A0A318TGY2|A0A318TGY2_9BRAD	9BRAD	1	Invasion protein IalB OS=Rhodopseudomonas faecalis OX=99655 GN=BJ122_10530 PE=4 SV=1	3.41057	0.00116352
tr|A0A318TK27|A0A318TK27_9BRAD	9BRAD	1	Iron-sulfur cluster carrier protein OS=Rhodopseudomonas faecalis OX=99655 GN=BJ122_102292 PE=3 SV=1	0.827192	0.544661
tr|A0A318TB01|A0A318TB01_9BRAD	9BRAD	10	Isocitrase OS=Rhodopseudomonas faecalis OX=99655 GN=BJ122_13313 PE=4 SV=1	1.8981	9.08539e-05
tr|A0A318T7S5|A0A318T7S5_9BRAD	9BRAD	4	Isocitrate dehydrogenase [NADP] OS=Rhodopseudomonas faecalis OX=99655 GN=BJ122_1512 PE=3 SV=1	0.495065	0.00922623
tr|A0A318TWL5|A0A318TWL5_9BRAD	9BRAD	1	Isoleucine--tRNA ligase OS=Rhodopseudomonas faecalis OX=99655 GN=ileS PE=3 SV=1	1.44964	0.175131
tr|A0A318TCB9|A0A318TCB9_9BRAD	9BRAD	3	Isovaleryl-CoA dehydrogenase OS=Rhodopseudomonas faecalis OX=99655 GN=BJ122_13211 PE=3 SV=1	0.562478	0.00466202
tr|A0A318TFU3|A0A318TFU3_9BRAD	9BRAD	2	K(+)-insensitive pyrophosphate-energized proton pump OS=Rhodopseudomonas faecalis OX=99655 GN=hppA PE=3 SV=1	1.05715	0.749514
tr|A0A318THL9|A0A318THL9_9BRAD	9BRAD	3	Ketol-acid reductoisomerase (NADP(+)) OS=Rhodopseudomonas faecalis OX=99655 GN=ilvC PE=3 SV=1	2.55539	1.9052e-05
tr|A0A318TKZ9|A0A318TKZ9_9BRAD	9BRAD	1	Lectin-like protein BA14k OS=Rhodopseudomonas faecalis OX=99655 GN=BJ122_101235 PE=3 SV=1	1.10694	0.730575
tr|A0A318TGF3|A0A318TGF3_9BRAD	9BRAD	2	Lectin-like protein BA14k OS=Rhodopseudomonas faecalis OX=99655 GN=BJ122_10684 PE=3 SV=1	0.998751	0.997552
tr|A0A318TH55|A0A318TH55_9BRAD	9BRAD	4	Leucine--tRNA ligase OS=Rhodopseudomonas faecalis OX=99655 GN=leuS PE=3 SV=1	0.598284	0.0357781
tr|A0A318TH77|A0A318TH77_9BRAD	9BRAD	1	Light-harvesting protein B-800-850 alpha chain OS=Rhodopseudomonas faecalis OX=99655 GN=BJ122_104191 PE=4 SV=1	1.86998	0.0558212
tr|A0A318U0V8|A0A318U0V8_9BRAD	9BRAD	1	Light-harvesting protein B-800-850 beta chain OS=Rhodopseudomonas faecalis OX=99655 GN=BJ122_101292 PE=3 SV=1	1.48248	0.248715
tr|A0A318TI96|A0A318TI96_9BRAD	9BRAD	3	Light-independent protochlorophyllide reductase iron-sulfur ATP-binding protein OS=Rhodopseudomonas faecalis OX=99655 GN=bchL PE=3 SV=1	1.21409	0.204886
tr|A0A318TDT3|A0A318TDT3_9BRAD	9BRAD	1	Light-independent protochlorophyllide reductase subunit B OS=Rhodopseudomonas faecalis OX=99655 GN=bchB PE=3 SV=1	0.906283	0.739947
tr|A0A318TLQ0|A0A318TLQ0_9BRAD	9BRAD	3	Light-independent protochlorophyllide reductase subunit N OS=Rhodopseudomonas faecalis OX=99655 GN=bchN PE=3 SV=1	0.607906	0.0448537
tr|A0A318TBK5|A0A318TBK5_9BRAD	9BRAD	1	Lon N-terminal domain-containing protein OS=Rhodopseudomonas faecalis OX=99655 GN=BJ122_11274 PE=4 SV=1	0.756646	0.429691
tr|A0A318TNG9|A0A318TNG9_9BRAD	9BRAD	8	Lon protease OS=Rhodopseudomonas faecalis OX=99655 GN=lon PE=2 SV=1	0.850637	0.199891
tr|A0A318TBN6|A0A318TBN6_9BRAD	9BRAD	1	Long-chain acyl-CoA synthetase OS=Rhodopseudomonas faecalis OX=99655 GN=BJ122_11535 PE=4 SV=1	0.442735	0.425189
tr|A0A318T827|A0A318T827_9BRAD	9BRAD	2	Long-chain acyl-CoA synthetase OS=Rhodopseudomonas faecalis OX=99655 GN=BJ122_1379 PE=4 SV=1	1.36051	0.365577
tr|A0A318TTT4|A0A318TTT4_9BRAD	9BRAD	1	LTXXQ motif family protein OS=Rhodopseudomonas faecalis OX=99655 GN=BJ122_10111 PE=3 SV=1	0.397384	0.000893498
tr|A0A318TMW8|A0A318TMW8_9BRAD	9BRAD	1	LuxR family two component transcriptional regulator OS=Rhodopseudomonas faecalis OX=99655 GN=BJ122_108145 PE=4 SV=1	0.729481	0.269516
tr|A0A318TGR7|A0A318TGR7_9BRAD	9BRAD	1	LuxR family two component transcriptional regulator OS=Rhodopseudomonas faecalis OX=99655 GN=BJ122_109112 PE=4 SV=1	0.464275	0.0194584
tr|A0A318TI68|A0A318TI68_9BRAD	9BRAD	2	Lysine--tRNA ligase OS=Rhodopseudomonas faecalis OX=99655 GN=lysS PE=3 SV=1	0.840984	0.396743
tr|A0A318TFT7|A0A318TFT7_9BRAD	9BRAD	1	Malate dehydrogenase (Oxaloacetate-decarboxylating)(NADP+) OS=Rhodopseudomonas faecalis OX=99655 GN=BJ122_107147 PE=3 SV=1	0.0725552	0.000948149
tr|A0A318TJR8|A0A318TJR8_9BRAD	9BRAD	4	Malate dehydrogenase OS=Rhodopseudomonas faecalis OX=99655 GN=mdh PE=3 SV=1	1.66995	0.00506365
tr|A0A318TAB1|A0A318TAB1_9BRAD	9BRAD	4	Malate synthase G OS=Rhodopseudomonas faecalis OX=99655 GN=glcB PE=3 SV=1	1.48432	0.00261007
tr|A0A318TEI2|A0A318TEI2_9BRAD	9BRAD	1	Malonyl CoA-acyl carrier protein transacylase OS=Rhodopseudomonas faecalis OX=99655 GN=BJ122_107116 PE=3 SV=1	1.81621	0.000139647
tr|A0A318TG42|A0A318TG42_9BRAD	9BRAD	1	Membrane fusion protein (Multidrug efflux system) OS=Rhodopseudomonas faecalis OX=99655 GN=BJ122_11087 PE=3 SV=1	1.64261	0.0656135
tr|A0A318TAZ7|A0A318TAZ7_9BRAD	9BRAD	2	Methylenetetrahydrofolate reductase OS=Rhodopseudomonas faecalis OX=99655 GN=BJ122_11866 PE=3 SV=1	2.92077	0.000717223
tr|A0A318TLR3|A0A318TLR3_9BRAD	9BRAD	5	Methylisocitrate lyase OS=Rhodopseudomonas faecalis OX=99655 GN=BJ122_101152 PE=3 SV=1	0.978565	0.864484
tr|A0A318TNB8|A0A318TNB8_9BRAD	9BRAD	7	Methylmalonate-semialdehyde dehydrogenase [acylating] OS=Rhodopseudomonas faecalis OX=99655 GN=BJ122_101116 PE=4 SV=1	1.77449	0.00188962
tr|A0A318U0L4|A0A318U0L4_9BRAD	9BRAD	1	Methylmalonyl-CoA epimerase /ethylmalonyl-CoA epimerase OS=Rhodopseudomonas faecalis OX=99655 GN=BJ122_101202 PE=3 SV=1	1.26874	0.371984
tr|A0A318T6X8|A0A318T6X8_9BRAD	9BRAD	1	Methylthioribose-1-phosphate isomerase OS=Rhodopseudomonas faecalis OX=99655 GN=mtnA PE=3 SV=1	0.135232	0.00281835
tr|A0A318TI54|A0A318TI54_9BRAD	9BRAD	5	Mg-protoporphyrin IX chelatase OS=Rhodopseudomonas faecalis OX=99655 GN=BJ122_11095 PE=3 SV=1	1.75858	0.000477405
tr|A0A318THW2|A0A318THW2_9BRAD	9BRAD	2	Microcin-processing peptidase 1 OS=Rhodopseudomonas faecalis OX=99655 GN=BJ122_103105 PE=3 SV=1	0.274588	0.00673641
tr|A0A318T8M8|A0A318T8M8_9BRAD	9BRAD	1	Molecular chaperone Hsp33 OS=Rhodopseudomonas faecalis OX=99655 GN=BJ122_1285 PE=4 SV=1	0.6305	0.0104265
tr|A0A318TJH1|A0A318TJH1_9BRAD	9BRAD	4	Molecular chaperone IbpA OS=Rhodopseudomonas faecalis OX=99655 GN=BJ122_103238 PE=3 SV=1	0.745258	0.18653
tr|A0A318TN74|A0A318TN74_9BRAD	9BRAD	1	Molybdenum cofactor synthesis domain-containing protein OS=Rhodopseudomonas faecalis OX=99655 GN=BJ122_10157 PE=4 SV=1	0.994108	0.97863
tr|A0A318TBI4|A0A318TBI4_9BRAD	9BRAD	1	MoxR-like ATPase OS=Rhodopseudomonas faecalis OX=99655 GN=BJ122_11263 PE=4 SV=1	0.522634	0.00306473
tr|A0A318TIJ2|A0A318TIJ2_9BRAD	9BRAD	2	Multidrug efflux pump subunit AcrB OS=Rhodopseudomonas faecalis OX=99655 GN=BJ122_10929 PE=4 SV=1	0.567378	0.179479
tr|A0A318TI01|A0A318TI01_9BRAD	9BRAD	1	N-acetyl-gamma-glutamyl-phosphate reductase OS=Rhodopseudomonas faecalis OX=99655 GN=argC PE=3 SV=1	1.16642	0.748244
tr|A0A318TDD0|A0A318TDD0_9BRAD	9BRAD	5	NAD(P) transhydrogenase alpha subunit OS=Rhodopseudomonas faecalis OX=99655 GN=BJ122_11183 PE=3 SV=1	1.84798	0.000106055
tr|A0A318TCD7|A0A318TCD7_9BRAD	9BRAD	2	NAD(P) transhydrogenase subunit beta OS=Rhodopseudomonas faecalis OX=99655 GN=BJ122_11181 PE=3 SV=1	1.83285	0.000725023
tr|A0A318TLN6|A0A318TLN6_9BRAD	9BRAD	1	NAD(P)-dependent dehydrogenase (Short-subunit alcohol dehydrogenase family) OS=Rhodopseudomonas faecalis OX=99655 GN=BJ122_101122 PE=3 SV=1	0.584422	0.119069
tr|A0A318TMM1|A0A318TMM1_9BRAD	9BRAD	2	NAD(P)-dependent dehydrogenase (Short-subunit alcohol dehydrogenase family) OS=Rhodopseudomonas faecalis OX=99655 GN=BJ122_10830 PE=3 SV=1	0.79727	0.0696967
tr|A0A318TLY5|A0A318TLY5_9BRAD	9BRAD	2	NAD(P)-dependent dehydrogenase (Short-subunit alcohol dehydrogenase family) OS=Rhodopseudomonas faecalis OX=99655 GN=BJ122_1095 PE=4 SV=1	2.11538	3.02657e-05
tr|A0A318U0K5|A0A318U0K5_9BRAD	9BRAD	1	NADH-quinone oxidoreductase OS=Rhodopseudomonas faecalis OX=99655 GN=BJ122_101192 PE=3 SV=1	5.69983	0.00856051
tr|A0A318TVR0|A0A318TVR0_9BRAD	9BRAD	1	NADPH:quinone reductase-like Zn-dependent oxidoreductase OS=Rhodopseudomonas faecalis OX=99655 GN=BJ122_10536 PE=3 SV=1	0.541364	0.0744962
tr|A0A318TJK4|A0A318TJK4_9BRAD	9BRAD	1	NepR domain-containing protein OS=Rhodopseudomonas faecalis OX=99655 GN=BJ122_11576 PE=4 SV=1	0.979234	0.960184
tr|A0A318TB05|A0A318TB05_9BRAD	9BRAD	5	N-ethylmaleimide reductase OS=Rhodopseudomonas faecalis OX=99655 GN=BJ122_13323 PE=4 SV=1	0.560852	0.00147767
tr|A0A318TP00|A0A318TP00_9BRAD	9BRAD	1	Nicotinate-nucleotide--dimethylbenzimidazole phosphoribosyltransferase OS=Rhodopseudomonas faecalis OX=99655 GN=cobT PE=3 SV=1	1.99842	0.00113385
tr|A0A318TKM7|A0A318TKM7_9BRAD	9BRAD	3	Nitrogen regulatory protein P-II OS=Rhodopseudomonas faecalis OX=99655 GN=BJ122_101171 PE=3 SV=1	1.83199	0.000264423
tr|A0A318TF09|A0A318TF09_9BRAD	9BRAD	1	Nitrogen regulatory protein P-II OS=Rhodopseudomonas faecalis OX=99655 GN=BJ122_11279 PE=3 SV=1	0.29934	0.00429115
tr|A0A318TK62|A0A318TK62_9BRAD	9BRAD	2	Nitrogenase iron protein OS=Rhodopseudomonas faecalis OX=99655 GN=nifH PE=3 SV=1	0.242675	0.000205095
tr|A0A318THH4|A0A318THH4_9BRAD	9BRAD	1	Nitronate monooxygenase OS=Rhodopseudomonas faecalis OX=99655 GN=BJ122_10781 PE=4 SV=1	0.734889	0.0671263
tr|A0A318TE09|A0A318TE09_9BRAD	9BRAD	2	Nucleoid DNA-binding protein OS=Rhodopseudomonas faecalis OX=99655 GN=BJ122_10836 PE=3 SV=1	1.66086	0.000585617
tr|A0A318TGN0|A0A318TGN0_9BRAD	9BRAD	1	Nucleoid-associated protein BJ122_109140 OS=Rhodopseudomonas faecalis OX=99655 GN=BJ122_109140 PE=3 SV=1	0.564291	0.0302126
tr|A0A318TEL6|A0A318TEL6_9BRAD	9BRAD	1	Nucleoside diphosphate kinase OS=Rhodopseudomonas faecalis OX=99655 GN=ndk PE=3 SV=1	0.255166	0.192291
tr|A0A318THB0|A0A318THB0_9BRAD	9BRAD	2	O-acetylhomoserine sulfhydrylase OS=Rhodopseudomonas faecalis OX=99655 GN=BJ122_105131 PE=3 SV=1	0.763898	0.606188
tr|A0A318TFG8|A0A318TFG8_9BRAD	9BRAD	1	Oligoendopeptidase F OS=Rhodopseudomonas faecalis OX=99655 GN=BJ122_11187 PE=3 SV=1	1.9909	0.000567478
tr|A0A318T900|A0A318T900_9BRAD	9BRAD	1	Ornithine carbamoyltransferase OS=Rhodopseudomonas faecalis OX=99655 GN=BJ122_1284 PE=3 SV=1	1.8008	0.113823
tr|A0A318TN96|A0A318TN96_9BRAD	9BRAD	1	O-succinylhomoserine sulfhydrylase OS=Rhodopseudomonas faecalis OX=99655 GN=metZ PE=3 SV=1	1.00108	0.995789
tr|A0A318TM98|A0A318TM98_9BRAD	9BRAD	1	Outer membrane immunogenic protein OS=Rhodopseudomonas faecalis OX=99655 GN=BJ122_109117 PE=4 SV=1	1.60225	0.0552812
tr|A0A318TCA8|A0A318TCA8_9BRAD	9BRAD	3	Outer membrane protein OmpA-like peptidoglycan-associated protein OS=Rhodopseudomonas faecalis OX=99655 GN=BJ122_12263 PE=4 SV=1	1.40268	0.0761084
tr|A0A318TI72|A0A318TI72_9BRAD	9BRAD	3	Parvulin-like PPIase OS=Rhodopseudomonas faecalis OX=99655 GN=BJ122_12175 PE=3 SV=1	1.40124	0.00542324
tr|A0A318TFD4|A0A318TFD4_9BRAD	9BRAD	1	PBP family phospholipid-binding protein OS=Rhodopseudomonas faecalis OX=99655 GN=BJ122_11630 PE=4 SV=1	1.44615	0.0402109
tr|A0A318TGC4|A0A318TGC4_9BRAD	9BRAD	1	Peptidase_S15 domain-containing protein OS=Rhodopseudomonas faecalis OX=99655 GN=BJ122_10654 PE=4 SV=1	0.926618	0.527726
tr|A0A318TLD3|A0A318TLD3_9BRAD	9BRAD	1	Peptidyl-prolyl cis-trans isomerase OS=Rhodopseudomonas faecalis OX=99655 GN=BJ122_101289 PE=3 SV=1	0.429885	0.387888
tr|A0A318TJ06|A0A318TJ06_9BRAD	9BRAD	1	Peptidyl-prolyl cis-trans isomerase OS=Rhodopseudomonas faecalis OX=99655 GN=BJ122_11748 PE=3 SV=1	0.167079	0.144569
tr|A0A318TDD5|A0A318TDD5_9BRAD	9BRAD	1	Peptidyl-prolyl cis-trans isomerase OS=Rhodopseudomonas faecalis OX=99655 GN=BJ122_11750 PE=3 SV=1	0.915834	0.842902
tr|A0A318TKM6|A0A318TKM6_9BRAD	9BRAD	5	Periplasmic serine endoprotease DegP-like OS=Rhodopseudomonas faecalis OX=99655 GN=BJ122_102189 PE=3 SV=1	0.979596	0.895827
tr|A0A318TAF1|A0A318TAF1_9BRAD	9BRAD	1	Periplasmic serine endoprotease DegP-like OS=Rhodopseudomonas faecalis OX=99655 GN=BJ122_1494 PE=3 SV=1	4.94742	0.00899816
tr|A0A318TAG2|A0A318TAG2_9BRAD	9BRAD	3	Phenylalanine--tRNA ligase beta subunit OS=Rhodopseudomonas faecalis OX=99655 GN=pheT PE=3 SV=1	0.570945	0.00220324
tr|A0A318T6Y8|A0A318T6Y8_9BRAD	9BRAD	5	Phosphate-binding protein PstS OS=Rhodopseudomonas faecalis OX=99655 GN=BJ122_13814 PE=3 SV=1	1.47082	0.0240838
tr|A0A318TJN9|A0A318TJN9_9BRAD	9BRAD	2	Phosphatidylserine decarboxylase proenzyme OS=Rhodopseudomonas faecalis OX=99655 GN=psd PE=3 SV=1	0.508545	0.208119
tr|A0A318TXZ6|A0A318TXZ6_9BRAD	9BRAD	1	Phosphofructokinase OS=Rhodopseudomonas faecalis OX=99655 GN=BJ122_103184 PE=3 SV=1	0.721049	0.53555
tr|A0A318TI34|A0A318TI34_9BRAD	9BRAD	2	Phosphoglucomutase OS=Rhodopseudomonas faecalis OX=99655 GN=BJ122_11075 PE=3 SV=1	0.458276	0.183349
tr|A0A318TJN0|A0A318TJN0_9BRAD	9BRAD	1	Phosphoglycolate phosphatase OS=Rhodopseudomonas faecalis OX=99655 GN=BJ122_102298 PE=3 SV=1	1.40459	0.382085
tr|A0A318T820|A0A318T820_9BRAD	9BRAD	1	Phosphomethylpyrimidine synthase OS=Rhodopseudomonas faecalis OX=99655 GN=thiC PE=3 SV=1	0.469464	0.0142473
tr|A0A318TNF7|A0A318TNF7_9BRAD	9BRAD	3	Phosphoribosylformylglycinamidine cyclo-ligase OS=Rhodopseudomonas faecalis OX=99655 GN=purM PE=3 SV=1	1.54483	0.00216662
tr|A0A318TAP1|A0A318TAP1_9BRAD	9BRAD	1	Phosphoribosylformylglycinamidine synthase subunit PurL OS=Rhodopseudomonas faecalis OX=99655 GN=purL PE=3 SV=1	0.866816	0.703805
tr|A0A318T6N1|A0A318T6N1_9BRAD	9BRAD	2	Phosphoribosylformylglycinamidine synthase subunit PurS OS=Rhodopseudomonas faecalis OX=99655 GN=purS PE=3 SV=1	0.942469	0.665163
tr|A0A318TF95|A0A318TF95_9BRAD	9BRAD	1	Phosphoribulokinase OS=Rhodopseudomonas faecalis OX=99655 GN=BJ122_106137 PE=3 SV=1	0.927313	0.843083
tr|A0A318TBE3|A0A318TBE3_9BRAD	9BRAD	6	Phosphoserine aminotransferase OS=Rhodopseudomonas faecalis OX=99655 GN=BJ122_11513 PE=4 SV=1	1.30445	0.0420097
tr|A0A318TKG6|A0A318TKG6_9BRAD	9BRAD	1	Phosphotransferase IIA-like nitrogen-regulatory protein PtsN OS=Rhodopseudomonas faecalis OX=99655 GN=BJ122_11246 PE=4 SV=1	0.976632	0.89628
tr|A0A318TD44|A0A318TD44_9BRAD	9BRAD	12	Photosynthetic reaction center H subunit OS=Rhodopseudomonas faecalis OX=99655 GN=BJ122_110138 PE=4 SV=1	2.22675	0.000317695
tr|A0A318TLM3|A0A318TLM3_9BRAD	9BRAD	4	Pimeloyl-ACP methyl ester carboxylesterase OS=Rhodopseudomonas faecalis OX=99655 GN=BJ122_110102 PE=4 SV=1	0.733774	0.0767774
tr|A0A318TCG5|A0A318TCG5_9BRAD	9BRAD	2	Pimeloyl-ACP methyl ester carboxylesterase OS=Rhodopseudomonas faecalis OX=99655 GN=BJ122_11265 PE=4 SV=1	0.820194	0.530767
tr|A0A318TBY0|A0A318TBY0_9BRAD	9BRAD	1	Pimeloyl-ACP methyl ester carboxylesterase OS=Rhodopseudomonas faecalis OX=99655 GN=BJ122_11411 PE=4 SV=1	0.157448	0.00205885
tr|A0A318TGU1|A0A318TGU1_9BRAD	9BRAD	3	Pimeloyl-CoA dehydrogenase small subunit OS=Rhodopseudomonas faecalis OX=99655 GN=BJ122_1082 PE=3 SV=1	0.525967	0.0355838
tr|A0A318THZ4|A0A318THZ4_9BRAD	9BRAD	2	PKS_ER domain-containing protein OS=Rhodopseudomonas faecalis OX=99655 GN=BJ122_107154 PE=4 SV=1	0.698722	0.36211
tr|A0A318T8W5|A0A318T8W5_9BRAD	9BRAD	3	Polyhydroxyalkanoate synthesis repressor PhaR OS=Rhodopseudomonas faecalis OX=99655 GN=BJ122_12151 PE=4 SV=1	1.67211	0.000694789
tr|A0A318TE72|A0A318TE72_9BRAD	9BRAD	12	Polyribonucleotide nucleotidyltransferase OS=Rhodopseudomonas faecalis OX=99655 GN=pnp PE=3 SV=1	1.24146	0.0709441
tr|A0A318THL5|A0A318THL5_9BRAD	9BRAD	3	Probable cytosol aminopeptidase OS=Rhodopseudomonas faecalis OX=99655 GN=pepA PE=3 SV=1	0.974351	0.796132
tr|A0A318TAY6|A0A318TAY6_9BRAD	9BRAD	1	Probable GTP-binding protein EngB OS=Rhodopseudomonas faecalis OX=99655 GN=engB PE=3 SV=1	0.276773	0.0376954
tr|A0A318TGI7|A0A318TGI7_9BRAD	9BRAD	3	Probable transcriptional regulatory protein BJ122_10998 OS=Rhodopseudomonas faecalis OX=99655 GN=BJ122_10998 PE=3 SV=1	1.53624	0.00060185
tr|A0A318TUG1|A0A318TUG1_9BRAD	9BRAD	5	Propionyl-CoA carboxylase carboxyltransferase subunit OS=Rhodopseudomonas faecalis OX=99655 GN=BJ122_10711 PE=4 SV=1	1.41601	0.00258528
tr|A0A318TF87|A0A318TF87_9BRAD	9BRAD	6	Propionyl-CoA carboxylase OS=Rhodopseudomonas faecalis OX=99655 GN=BJ122_10729 PE=4 SV=1	0.787962	0.0484653
tr|A0A318TM49|A0A318TM49_9BRAD	9BRAD	8	Propionyl-CoA synthetase OS=Rhodopseudomonas faecalis OX=99655 GN=BJ122_104106 PE=3 SV=1	1.17618	0.0562653
tr|A0A318TCA3|A0A318TCA3_9BRAD	9BRAD	2	Protein GrpE OS=Rhodopseudomonas faecalis OX=99655 GN=grpE PE=3 SV=1	0.969143	0.6625
tr|A0A318T9N4|A0A318T9N4_9BRAD	9BRAD	3	Protein HflC OS=Rhodopseudomonas faecalis OX=99655 GN=BJ122_1239 PE=3 SV=1	0.922759	0.782208
tr|A0A318T9C4|A0A318T9C4_9BRAD	9BRAD	7	Protein HflK OS=Rhodopseudomonas faecalis OX=99655 GN=BJ122_12310 PE=3 SV=1	1.17733	0.162235
tr|A0A318T800|A0A318T800_9BRAD	9BRAD	1	Protein RecA OS=Rhodopseudomonas faecalis OX=99655 GN=recA PE=3 SV=1	1.53315	0.0430699
tr|A0A318TA32|A0A318TA32_9BRAD	9BRAD	8	Protein translocase subunit SecA OS=Rhodopseudomonas faecalis OX=99655 GN=secA PE=3 SV=1	0.907372	0.332354
tr|A0A318TGX4|A0A318TGX4_9BRAD	9BRAD	1	Protein translocase subunit SecD OS=Rhodopseudomonas faecalis OX=99655 GN=secD PE=3 SV=1	1.98749	0.0239935
tr|A0A318TCZ7|A0A318TCZ7_9BRAD	9BRAD	1	Protein-export protein SecB OS=Rhodopseudomonas faecalis OX=99655 GN=secB PE=3 SV=1	1.23557	0.334931
tr|A0A318T867|A0A318T867_9BRAD	9BRAD	1	Putative DNA-binding ribbon-helix-helix protein OS=Rhodopseudomonas faecalis OX=99655 GN=BJ122_12319 PE=4 SV=1	1.93683	0.000194564
tr|A0A318TCK0|A0A318TCK0_9BRAD	9BRAD	1	Putative lipid-binding transport protein (Tim44 family) OS=Rhodopseudomonas faecalis OX=99655 GN=BJ122_112106 PE=3 SV=1	1.65204	0.40583
tr|A0A318T9E1|A0A318T9E1_9BRAD	9BRAD	2	Putative membrane protein OS=Rhodopseudomonas faecalis OX=99655 GN=BJ122_11966 PE=4 SV=1	1.12119	0.751071
tr|A0A318TDP3|A0A318TDP3_9BRAD	9BRAD	2	Putative membrane-anchored protein OS=Rhodopseudomonas faecalis OX=99655 GN=BJ122_11093 PE=4 SV=1	0.219722	0.00065756
tr|A0A318TEU6|A0A318TEU6_9BRAD	9BRAD	2	Putative surface protein with fasciclin (FAS1) repeats OS=Rhodopseudomonas faecalis OX=99655 GN=BJ122_1126 PE=4 SV=1	2.08969	0.00634666
tr|A0A318TBG4|A0A318TBG4_9BRAD	9BRAD	1	Pyruvate carboxylase OS=Rhodopseudomonas faecalis OX=99655 GN=BJ122_11668 PE=4 SV=1	0.659686	0.148179
tr|A0A318TBT0|A0A318TBT0_9BRAD	9BRAD	2	Response regulator receiver domain-containing protein OS=Rhodopseudomonas faecalis OX=99655 GN=BJ122_11577 PE=4 SV=1	1.34039	0.0934264
tr|A0A318TDL6|A0A318TDL6_9BRAD	9BRAD	1	Rhodanese-related sulfurtransferase OS=Rhodopseudomonas faecalis OX=99655 GN=BJ122_11063 PE=4 SV=1	1.14397	0.777045
tr|A0A318TF30|A0A318TF30_9BRAD	9BRAD	1	Ribonuclease E OS=Rhodopseudomonas faecalis OX=99655 GN=rne PE=3 SV=1	0.70348	0.0311524
tr|A0A318TJV5|A0A318TJV5_9BRAD	9BRAD	1	Ribonuclease PH OS=Rhodopseudomonas faecalis OX=99655 GN=rph PE=3 SV=1	1.44104	0.312442
tr|A0A318TKY2|A0A318TKY2_9BRAD	9BRAD	2	Ribose-5-phosphate isomerase A OS=Rhodopseudomonas faecalis OX=99655 GN=rpiA PE=3 SV=1	0.57281	0.173191
tr|A0A318TAF7|A0A318TAF7_9BRAD	9BRAD	2	Ribose-phosphate pyrophosphokinase OS=Rhodopseudomonas faecalis OX=99655 GN=prs PE=3 SV=1	0.746626	0.037208
tr|A0A318T8U8|A0A318T8U8_9BRAD	9BRAD	1	Ribosome maturation factor RimP OS=Rhodopseudomonas faecalis OX=99655 GN=rimP PE=3 SV=1	0.875284	0.666716
tr|A0A318TI32|A0A318TI32_9BRAD	9BRAD	1	Ribosome-binding factor A OS=Rhodopseudomonas faecalis OX=99655 GN=rbfA PE=3 SV=1	0.434719	0.246589
tr|A0A318TKX9|A0A318TKX9_9BRAD	9BRAD	3	Ribosome-recycling factor OS=Rhodopseudomonas faecalis OX=99655 GN=frr PE=3 SV=1	1.43325	0.00155871
tr|A0A318TBK9|A0A318TBK9_9BRAD	9BRAD	3	RNA polymerase sigma factor OS=Rhodopseudomonas faecalis OX=99655 GN=BJ122_11575 PE=3 SV=1	1.07851	0.656073
tr|A0A318TTB8|A0A318TTB8_9BRAD	9BRAD	5	RND family efflux transporter MFP subunit OS=Rhodopseudomonas faecalis OX=99655 GN=BJ122_10930 PE=3 SV=1	0.810322	0.0762061
tr|A0A318TCQ0|A0A318TCQ0_9BRAD	9BRAD	1	S1 motif domain-containing protein OS=Rhodopseudomonas faecalis OX=99655 GN=BJ122_11267 PE=4 SV=1	0.32271	0.0125963
tr|A0A318T815|A0A318T815_9BRAD	9BRAD	9	S41A family C-terminal processing peptidase-3 OS=Rhodopseudomonas faecalis OX=99655 GN=BJ122_12425 PE=3 SV=1	1.31358	0.0148909
tr|A0A318T8K1|A0A318T8K1_9BRAD	9BRAD	4	S-adenosylmethionine synthase OS=Rhodopseudomonas faecalis OX=99655 GN=metK PE=3 SV=1	1.17672	0.167767
tr|A0A318TL35|A0A318TL35_9BRAD	9BRAD	1	Sec-independent protein translocase protein TatA OS=Rhodopseudomonas faecalis OX=99655 GN=tatA PE=3 SV=1	1.81819	3.62167e-05
tr|A0A318TMH5|A0A318TMH5_9BRAD	9BRAD	8	Secreted protein OS=Rhodopseudomonas faecalis OX=99655 GN=BJ122_102293 PE=3 SV=1	1.26458	0.00934455
tr|A0A318TPH9|A0A318TPH9_9BRAD	9BRAD	4	Serine hydroxymethyltransferase OS=Rhodopseudomonas faecalis OX=99655 GN=glyA PE=3 SV=1	1.68116	0.0180106
tr|A0A318TI86|A0A318TI86_9BRAD	9BRAD	10	Short chain enoyl-CoA hydratase /3-hydroxyacyl-CoA dehydrogenase OS=Rhodopseudomonas faecalis OX=99655 GN=BJ122_103227 PE=3 SV=1	1.13447	0.102927
tr|A0A318TJT0|A0A318TJT0_9BRAD	9BRAD	1	Short chain enoyl-CoA hydratase OS=Rhodopseudomonas faecalis OX=99655 GN=BJ122_102109 PE=3 SV=1	0.448958	0.00358558
tr|A0A318TAY8|A0A318TAY8_9BRAD	9BRAD	3	Signal recognition particle protein OS=Rhodopseudomonas faecalis OX=99655 GN=ffh PE=3 SV=1	0.700208	0.00289693
tr|A0A318TSN4|A0A318TSN4_9BRAD	9BRAD	1	Single cache domain-containing protein OS=Rhodopseudomonas faecalis OX=99655 GN=BJ122_10280 PE=4 SV=1	1.2502	0.681955
tr|A0A318TFD5|A0A318TFD5_9BRAD	9BRAD	2	Single cache domain-containing protein OS=Rhodopseudomonas faecalis OX=99655 GN=BJ122_10790 PE=4 SV=1	3.22128	0.0117907
tr|A0A318THE7|A0A318THE7_9BRAD	9BRAD	2	Single-stranded DNA-binding protein OS=Rhodopseudomonas faecalis OX=99655 GN=BJ122_105161 PE=3 SV=1	1.12626	0.561303
tr|A0A318TAM1|A0A318TAM1_9BRAD	9BRAD	2	S-methyl-5'-thioadenosine phosphorylase OS=Rhodopseudomonas faecalis OX=99655 GN=mtnP PE=3 SV=1	1.81351	0.062253
tr|A0A318TBT9|A0A318TBT9_9BRAD	9BRAD	4	Sporulation protein YlmC with PRC-barrel domain OS=Rhodopseudomonas faecalis OX=99655 GN=BJ122_14013 PE=4 SV=1	1.188	0.579977
tr|A0A318THD6|A0A318THD6_9BRAD	9BRAD	1	Squalene-hopene/tetraprenyl-beta-curcumene cyclase OS=Rhodopseudomonas faecalis OX=99655 GN=BJ122_104114 PE=3 SV=1	1.27772	0.302159
tr|A0A318TKY8|A0A318TKY8_9BRAD	9BRAD	4	Starvation-inducible DNA-binding protein OS=Rhodopseudomonas faecalis OX=99655 GN=BJ122_103151 PE=3 SV=1	1.05313	0.740113
tr|A0A318T8H9|A0A318T8H9_9BRAD	9BRAD	4	Succinate dehydrogenase flavoprotein subunit OS=Rhodopseudomonas faecalis OX=99655 GN=BJ122_12268 PE=3 SV=1	1.31809	0.0124299
tr|A0A318T8R0|A0A318T8R0_9BRAD	9BRAD	1	Succinate dehydrogenase iron-sulfur subunit OS=Rhodopseudomonas faecalis OX=99655 GN=BJ122_12267 PE=3 SV=1	0.599495	0.0518755
tr|A0A318TC46|A0A318TC46_9BRAD	9BRAD	3	Succinate--CoA ligase [ADP-forming] subunit alpha OS=Rhodopseudomonas faecalis OX=99655 GN=sucD PE=3 SV=1	1.79069	0.00293218
tr|A0A318TBR7|A0A318TBR7_9BRAD	9BRAD	5	Succinate--CoA ligase [ADP-forming] subunit beta OS=Rhodopseudomonas faecalis OX=99655 GN=sucC PE=3 SV=1	1.44303	0.000942016
tr|A0A318TTL1|A0A318TTL1_9BRAD	9BRAD	5	Sugar transport protein OS=Rhodopseudomonas faecalis OX=99655 GN=BJ122_109111 PE=4 SV=1	1.04932	0.661914
tr|A0A318T9V3|A0A318T9V3_9BRAD	9BRAD	1	Sulfate thiol esterase SoxB OS=Rhodopseudomonas faecalis OX=99655 GN=BJ122_11644 PE=3 SV=1	0.810951	0.442517
tr|A0A318TL25|A0A318TL25_9BRAD	9BRAD	6	Sulfide dehydrogenase (Flavoprotein) subunit SudA /sulfide dehydrogenase (Flavoprotein) subunit SudB OS=Rhodopseudomonas faecalis OX=99655 GN=BJ122_103185 PE=4 SV=1	0.635555	0.026402
tr|A0A318TP10|A0A318TP10_9BRAD	9BRAD	1	Sulfide:quinone oxidoreductase OS=Rhodopseudomonas faecalis OX=99655 GN=BJ122_106119 PE=4 SV=1	0.872904	0.695917
tr|A0A318TJ39|A0A318TJ39_9BRAD	9BRAD	3	Superoxide dismutase OS=Rhodopseudomonas faecalis OX=99655 GN=BJ122_10833 PE=3 SV=1	1.22861	0.247921
tr|A0A318TJV9|A0A318TJV9_9BRAD	9BRAD	1	Tetratricopeptide repeat protein OS=Rhodopseudomonas faecalis OX=99655 GN=BJ122_10478 PE=4 SV=1	0.952463	0.911825
tr|A0A318TBN8|A0A318TBN8_9BRAD	9BRAD	3	Thioredoxin OS=Rhodopseudomonas faecalis OX=99655 GN=BJ122_11273 PE=3 SV=1	0.269144	0.000876869
tr|A0A318TGH1|A0A318TGH1_9BRAD	9BRAD	1	Threonine synthase OS=Rhodopseudomonas faecalis OX=99655 GN=BJ122_10988 PE=3 SV=1	0.84609	0.412196
tr|A0A318T9R5|A0A318T9R5_9BRAD	9BRAD	2	Transaldolase OS=Rhodopseudomonas faecalis OX=99655 GN=tal PE=3 SV=1	0.782017	0.210075
tr|A0A318TD33|A0A318TD33_9BRAD	9BRAD	3	Transcription elongation factor GreA OS=Rhodopseudomonas faecalis OX=99655 GN=greA PE=3 SV=1	1.46556	0.00372301
tr|A0A318TF29|A0A318TF29_9BRAD	9BRAD	1	Transcription termination factor Rho OS=Rhodopseudomonas faecalis OX=99655 GN=rho PE=3 SV=1	1.41332	0.222842
tr|A0A318T8L6|A0A318T8L6_9BRAD	9BRAD	4	Transcription termination/antitermination protein NusA OS=Rhodopseudomonas faecalis OX=99655 GN=nusA PE=3 SV=1	1.27606	0.174366
tr|A0A318T9C6|A0A318T9C6_9BRAD	9BRAD	3	Transcription termination/antitermination protein NusG OS=Rhodopseudomonas faecalis OX=99655 GN=nusG PE=3 SV=1	2.17876	0.000276454
tr|A0A318TFE9|A0A318TFE9_9BRAD	9BRAD	2	Transketolase OS=Rhodopseudomonas faecalis OX=99655 GN=BJ122_106136 PE=3 SV=1	1.96632	0.00772666
tr|A0A318T9T6|A0A318T9T6_9BRAD	9BRAD	9	Translation initiation factor IF-2 OS=Rhodopseudomonas faecalis OX=99655 GN=infB PE=3 SV=1	1.02202	0.84095
tr|A0A318TLB3|A0A318TLB3_9BRAD	9BRAD	11	Trigger factor OS=Rhodopseudomonas faecalis OX=99655 GN=tig PE=3 SV=1	1.25393	0.000225997
tr|A0A318TGV5|A0A318TGV5_9BRAD	9BRAD	1	Tripartite ATP-independent transporter DctP family solute receptor OS=Rhodopseudomonas faecalis OX=99655 GN=BJ122_105152 PE=3 SV=1	1.1811	0.569624
tr|A0A318TC39|A0A318TC39_9BRAD	9BRAD	6	Tripartite-type tricarboxylate transporter receptor subunit TctC OS=Rhodopseudomonas faecalis OX=99655 GN=BJ122_111102 PE=3 SV=1	1.58578	0.00270629
tr|A0A318TCL0|A0A318TCL0_9BRAD	9BRAD	1	Tryptophan synthase beta chain OS=Rhodopseudomonas faecalis OX=99655 GN=trpB PE=3 SV=1	0.665973	0.0312098
tr|A0A318TNC7|A0A318TNC7_9BRAD	9BRAD	2	Tryptophan synthase beta chain OS=Rhodopseudomonas faecalis OX=99655 GN=trpB PE=3 SV=1	0.969966	0.910124
tr|A0A318T9X4|A0A318T9X4_9BRAD	9BRAD	1	Tryptophan--tRNA ligase OS=Rhodopseudomonas faecalis OX=99655 GN=trpS PE=3 SV=1	0.712822	0.16807
tr|A0A318TNV0|A0A318TNV0_9BRAD	9BRAD	4	Tyrosine--tRNA ligase OS=Rhodopseudomonas faecalis OX=99655 GN=tyrS PE=3 SV=1	1.10575	0.65808
tr|A0A318TDW0|A0A318TDW0_9BRAD	9BRAD	2	Ubiquinone biosynthesis protein UbiU OS=Rhodopseudomonas faecalis OX=99655 GN=ubiU PE=3 SV=1	0.511825	0.00450575
tr|A0A318TBB4|A0A318TBB4_9BRAD	9BRAD	1	Ubiquinone/menaquinone biosynthesis C-methyltransferase UbiE OS=Rhodopseudomonas faecalis OX=99655 GN=ubiE PE=3 SV=1	0.945392	0.881207
tr|A0A318T8H7|A0A318T8H7_9BRAD	9BRAD	1	UDP-N-acetylmuramate--L-alanine ligase OS=Rhodopseudomonas faecalis OX=99655 GN=murC PE=3 SV=1	0.986747	0.981754
tr|A0A318TTZ6|A0A318TTZ6_9BRAD	9BRAD	1	Uncharacterized protein (DUF2147 family) OS=Rhodopseudomonas faecalis OX=99655 GN=BJ122_10834 PE=4 SV=1	1.21031	0.286125
tr|A0A318THK8|A0A318THK8_9BRAD	9BRAD	2	Uncharacterized protein (TIGR00255 family) OS=Rhodopseudomonas faecalis OX=99655 GN=BJ122_107121 PE=4 SV=1	0.915568	0.706284
tr|A0A318TDT0|A0A318TDT0_9BRAD	9BRAD	2	Uncharacterized protein (TIGR02284 family) OS=Rhodopseudomonas faecalis OX=99655 GN=BJ122_11090 PE=4 SV=1	0.77037	0.094945
tr|A0A318TV67|A0A318TV67_9BRAD	9BRAD	1	Uncharacterized protein DUF1236 OS=Rhodopseudomonas faecalis OX=99655 GN=BJ122_10670 PE=4 SV=1	0.486734	0.373272
tr|A0A318TA03|A0A318TA03_9BRAD	9BRAD	2	Uncharacterized protein DUF2147 OS=Rhodopseudomonas faecalis OX=99655 GN=BJ122_12017 PE=4 SV=1	2.42268	0.00010187
tr|A0A318TJ09|A0A318TJ09_9BRAD	9BRAD	2	Uncharacterized protein DUF2848 OS=Rhodopseudomonas faecalis OX=99655 GN=BJ122_10277 PE=4 SV=1	0.590038	0.024055
tr|A0A318TIL9|A0A318TIL9_9BRAD	9BRAD	1	Uncharacterized protein DUF2852 OS=Rhodopseudomonas faecalis OX=99655 GN=BJ122_10959 PE=4 SV=1	0.361212	0.0427205
tr|A0A318TKJ2|A0A318TKJ2_9BRAD	9BRAD	1	Uncharacterized protein DUF3126 OS=Rhodopseudomonas faecalis OX=99655 GN=BJ122_10170 PE=4 SV=1	0.503295	0.0724743
tr|A0A318TG07|A0A318TG07_9BRAD	9BRAD	1	Uncharacterized protein DUF3222 OS=Rhodopseudomonas faecalis OX=99655 GN=BJ122_106131 PE=4 SV=1	1.19255	0.579634
tr|A0A318TAT7|A0A318TAT7_9BRAD	9BRAD	3	Uncharacterized protein DUF3297 OS=Rhodopseudomonas faecalis OX=99655 GN=BJ122_11816 PE=4 SV=1	2.25969	6.14687e-05
tr|A0A318T9E7|A0A318T9E7_9BRAD	9BRAD	1	Uncharacterized protein DUF3365 OS=Rhodopseudomonas faecalis OX=99655 GN=BJ122_1255 PE=4 SV=1	2.73468	0.000224206
tr|A0A336JH08|A0A336JH08_9BRAD	9BRAD	2	Uncharacterized protein DUF3597 OS=Rhodopseudomonas pentothenatexigens OX=999699 GN=SAMN05892882_101161 PE=4 SV=1	0.413202	5.87295e-05
tr|A0A318TP56|A0A318TP56_9BRAD	9BRAD	1	Uncharacterized protein DUF3775 OS=Rhodopseudomonas faecalis OX=99655 GN=BJ122_12213 PE=4 SV=1	1.07385	0.805528
tr|A0A318TF42|A0A318TF42_9BRAD	9BRAD	1	Uncharacterized protein DUF4261 OS=Rhodopseudomonas faecalis OX=99655 GN=BJ122_11721 PE=4 SV=1	0.320348	0.0977387
tr|A0A318TR55|A0A318TR55_9BRAD	9BRAD	1	Uncharacterized protein DUF5076 OS=Rhodopseudomonas faecalis OX=99655 GN=BJ122_101261 PE=4 SV=1	1.20086	0.666581
tr|A0A318T8T1|A0A318T8T1_9BRAD	9BRAD	4	Uncharacterized protein DUF992 OS=Rhodopseudomonas faecalis OX=99655 GN=BJ122_13123 PE=4 SV=1	1.06677	0.763112
tr|A0A318TDP2|A0A318TDP2_9BRAD	9BRAD	1	Uncharacterized protein GlcG (DUF336 family) OS=Rhodopseudomonas faecalis OX=99655 GN=BJ122_11649 PE=4 SV=1	0.333695	0.00160198
tr|A0A318TQW5|A0A318TQW5_9BRAD	9BRAD	1	Uncharacterized protein OS=Rhodopseudomonas faecalis OX=99655 GN=BJ122_101168 PE=4 SV=1	0.238817	0.00050246
tr|A0A318U0I7|A0A318U0I7_9BRAD	9BRAD	3	Uncharacterized protein OS=Rhodopseudomonas faecalis OX=99655 GN=BJ122_101169 PE=4 SV=1	1.93857	0.00113809
tr|A0A318TKQ5|A0A318TKQ5_9BRAD	9BRAD	2	Uncharacterized protein OS=Rhodopseudomonas faecalis OX=99655 GN=BJ122_101204 PE=4 SV=1	0.31693	0.00904601
tr|A0A318TJM1|A0A318TJM1_9BRAD	9BRAD	1	Uncharacterized protein OS=Rhodopseudomonas faecalis OX=99655 GN=BJ122_102132 PE=4 SV=1	0.104368	0.00370625
tr|A0A318TK06|A0A318TK06_9BRAD	9BRAD	4	Uncharacterized protein OS=Rhodopseudomonas faecalis OX=99655 GN=BJ122_102200 PE=4 SV=1	1.37395	0.275854
tr|A0A318TLS1|A0A318TLS1_9BRAD	9BRAD	1	Uncharacterized protein OS=Rhodopseudomonas faecalis OX=99655 GN=BJ122_10235 PE=4 SV=1	0.527372	0.0114302
tr|A0A318TKA4|A0A318TKA4_9BRAD	9BRAD	1	Uncharacterized protein OS=Rhodopseudomonas faecalis OX=99655 GN=BJ122_10288 PE=4 SV=1	1.81166	0.00328254
tr|A0A318THY6|A0A318THY6_9BRAD	9BRAD	1	Uncharacterized protein OS=Rhodopseudomonas faecalis OX=99655 GN=BJ122_103114 PE=4 SV=1	0.426461	0.0158811
tr|A0A318TKW4|A0A318TKW4_9BRAD	9BRAD	1	Uncharacterized protein OS=Rhodopseudomonas faecalis OX=99655 GN=BJ122_103120 PE=4 SV=1	0.483592	0.279787
tr|A0A318TIK8|A0A318TIK8_9BRAD	9BRAD	3	Uncharacterized protein OS=Rhodopseudomonas faecalis OX=99655 GN=BJ122_103178 PE=4 SV=1	0.935916	0.699057
tr|A0A318TL56|A0A318TL56_9BRAD	9BRAD	1	Uncharacterized protein OS=Rhodopseudomonas faecalis OX=99655 GN=BJ122_103225 PE=3 SV=1	0.770628	0.394215
tr|A0A318TKN1|A0A318TKN1_9BRAD	9BRAD	1	Uncharacterized protein OS=Rhodopseudomonas faecalis OX=99655 GN=BJ122_10333 PE=4 SV=1	0.59908	0.0661817
tr|A0A318TGX7|A0A318TGX7_9BRAD	9BRAD	2	Uncharacterized protein OS=Rhodopseudomonas faecalis OX=99655 GN=BJ122_104110 PE=4 SV=1	0.604941	0.000339508
tr|A0A318THH9|A0A318THH9_9BRAD	9BRAD	2	Uncharacterized protein OS=Rhodopseudomonas faecalis OX=99655 GN=BJ122_104112 PE=4 SV=1	0.380495	0.0102008
tr|A0A318TWX7|A0A318TWX7_9BRAD	9BRAD	1	Uncharacterized protein OS=Rhodopseudomonas faecalis OX=99655 GN=BJ122_10497 PE=4 SV=1	1.07172	0.722806
tr|A0A318TPP8|A0A318TPP8_9BRAD	9BRAD	6	Uncharacterized protein OS=Rhodopseudomonas faecalis OX=99655 GN=BJ122_105153 PE=4 SV=1	1.05056	0.747257
tr|A0A318TIU6|A0A318TIU6_9BRAD	9BRAD	1	Uncharacterized protein OS=Rhodopseudomonas faecalis OX=99655 GN=BJ122_10517 PE=4 SV=1	1.7134	0.0430833
tr|A0A318TVD6|A0A318TVD6_9BRAD	9BRAD	1	Uncharacterized protein OS=Rhodopseudomonas faecalis OX=99655 GN=BJ122_106144 PE=4 SV=1	0.735518	0.269197
tr|A0A318TFF6|A0A318TFF6_9BRAD	9BRAD	1	Uncharacterized protein OS=Rhodopseudomonas faecalis OX=99655 GN=BJ122_107108 PE=4 SV=1	0.342951	0.00655881
tr|A0A318THK2|A0A318THK2_9BRAD	9BRAD	2	Uncharacterized protein OS=Rhodopseudomonas faecalis OX=99655 GN=BJ122_10712 PE=4 SV=1	0.920523	0.795886
tr|A0A318TE96|A0A318TE96_9BRAD	9BRAD	1	Uncharacterized protein OS=Rhodopseudomonas faecalis OX=99655 GN=BJ122_10714 PE=4 SV=1	0.316369	0.0156843
tr|A0A318TFE8|A0A318TFE8_9BRAD	9BRAD	3	Uncharacterized protein OS=Rhodopseudomonas faecalis OX=99655 GN=BJ122_10798 PE=4 SV=1	0.99257	0.973574
tr|A0A318TGG7|A0A318TGG7_9BRAD	9BRAD	2	Uncharacterized protein OS=Rhodopseudomonas faecalis OX=99655 GN=BJ122_10910 PE=4 SV=1	0.480075	0.0200121
tr|A0A318TEB6|A0A318TEB6_9BRAD	9BRAD	1	Uncharacterized protein OS=Rhodopseudomonas faecalis OX=99655 GN=BJ122_10944 PE=4 SV=1	1.46805	0.0293878
tr|A0A318TT93|A0A318TT93_9BRAD	9BRAD	1	Uncharacterized protein OS=Rhodopseudomonas faecalis OX=99655 GN=BJ122_1099 PE=4 SV=1	1.05537	0.810639
tr|A0A318TFY2|A0A318TFY2_9BRAD	9BRAD	2	Uncharacterized protein OS=Rhodopseudomonas faecalis OX=99655 GN=BJ122_11016 PE=3 SV=1	0.822946	0.162012
tr|A0A318TI44|A0A318TI44_9BRAD	9BRAD	6	Uncharacterized protein OS=Rhodopseudomonas faecalis OX=99655 GN=BJ122_11085 PE=4 SV=1	1.31916	0.0478717
tr|A0A318TSW4|A0A318TSW4_9BRAD	9BRAD	3	Uncharacterized protein OS=Rhodopseudomonas faecalis OX=99655 GN=BJ122_11086 PE=4 SV=1	0.849768	0.648801
tr|A0A318TCL6|A0A318TCL6_9BRAD	9BRAD	2	Uncharacterized protein OS=Rhodopseudomonas faecalis OX=99655 GN=BJ122_11089 PE=4 SV=1	0.657971	0.589966
tr|A0A318TDB9|A0A318TDB9_9BRAD	9BRAD	2	Uncharacterized protein OS=Rhodopseudomonas faecalis OX=99655 GN=BJ122_11173 PE=4 SV=1	1.16705	0.644242
tr|A0A318TH44|A0A318TH44_9BRAD	9BRAD	2	Uncharacterized protein OS=Rhodopseudomonas faecalis OX=99655 GN=BJ122_11269 PE=4 SV=1	1.11799	0.437085
tr|A0A318TC23|A0A318TC23_9BRAD	9BRAD	1	Uncharacterized protein OS=Rhodopseudomonas faecalis OX=99655 GN=BJ122_11338 PE=4 SV=1	2.43782	0.000537282
tr|A0A318TG77|A0A318TG77_9BRAD	9BRAD	1	Uncharacterized protein OS=Rhodopseudomonas faecalis OX=99655 GN=BJ122_11453 PE=4 SV=1	0.454195	0.333557
tr|A0A318TDX8|A0A318TDX8_9BRAD	9BRAD	2	Uncharacterized protein OS=Rhodopseudomonas faecalis OX=99655 GN=BJ122_11526 PE=4 SV=1	0.979786	0.91612
tr|A0A318TAL9|A0A318TAL9_9BRAD	9BRAD	2	Uncharacterized protein OS=Rhodopseudomonas faecalis OX=99655 GN=BJ122_11530 PE=4 SV=1	0.925405	0.747699
tr|A0A318TBK0|A0A318TBK0_9BRAD	9BRAD	1	Uncharacterized protein OS=Rhodopseudomonas faecalis OX=99655 GN=BJ122_11564 PE=4 SV=1	0.737394	0.0494274
tr|A0A318TAQ2|A0A318TAQ2_9BRAD	9BRAD	2	Uncharacterized protein OS=Rhodopseudomonas faecalis OX=99655 GN=BJ122_11572 PE=4 SV=1	2.31903	0.000591874
tr|A0A318TQG9|A0A318TQG9_9BRAD	9BRAD	1	Uncharacterized protein OS=Rhodopseudomonas faecalis OX=99655 GN=BJ122_11621 PE=4 SV=1	1.203	0.729922
tr|A0A318TEH7|A0A318TEH7_9BRAD	9BRAD	2	Uncharacterized protein OS=Rhodopseudomonas faecalis OX=99655 GN=BJ122_12061 PE=4 SV=1	0.22847	8.57866e-05
tr|A0A318T9X5|A0A318T9X5_9BRAD	9BRAD	1	Uncharacterized protein OS=Rhodopseudomonas faecalis OX=99655 GN=BJ122_12228 PE=4 SV=1	2.23299	0.00168344
tr|A0A318TBZ3|A0A318TBZ3_9BRAD	9BRAD	2	Uncharacterized protein OS=Rhodopseudomonas faecalis OX=99655 GN=BJ122_12327 PE=4 SV=1	1.25692	0.288556
tr|A0A318T826|A0A318T826_9BRAD	9BRAD	1	Uncharacterized protein OS=Rhodopseudomonas faecalis OX=99655 GN=BJ122_12630 PE=4 SV=1	0.293741	0.0208813
tr|A0A318T916|A0A318T916_9BRAD	9BRAD	3	Uncharacterized protein OS=Rhodopseudomonas faecalis OX=99655 GN=BJ122_12739 PE=4 SV=1	2.3983	0.124041
tr|A0A318T8W4|A0A318T8W4_9BRAD	9BRAD	1	Uncharacterized protein OS=Rhodopseudomonas faecalis OX=99655 GN=BJ122_12747 PE=4 SV=1	1.41126	0.291557
tr|A0A318T911|A0A318T911_9BRAD	9BRAD	3	Uncharacterized protein OS=Rhodopseudomonas faecalis OX=99655 GN=BJ122_12816 PE=4 SV=1	0.778346	0.472663
tr|A0A318T8D1|A0A318T8D1_9BRAD	9BRAD	1	Uncharacterized protein OS=Rhodopseudomonas faecalis OX=99655 GN=BJ122_13217 PE=4 SV=1	0.565438	0.0995427
tr|A0A318T8E7|A0A318T8E7_9BRAD	9BRAD	2	Uncharacterized protein OS=Rhodopseudomonas faecalis OX=99655 GN=BJ122_13312 PE=4 SV=1	1.35859	0.289138
tr|A0A318T7Z9|A0A318T7Z9_9BRAD	9BRAD	2	Uncharacterized protein OS=Rhodopseudomonas faecalis OX=99655 GN=BJ122_13915 PE=4 SV=1	0.253229	0.000822245
tr|A0A318TAD2|A0A318TAD2_9BRAD	9BRAD	3	Uncharacterized protein OS=Rhodopseudomonas faecalis OX=99655 GN=BJ122_1602 PE=4 SV=1	1.35061	0.0375723
tr|A0A0N0KDB7|A0A0N0KDB7_9BRAD	9BRAD	1	Uncharacterized protein OS=Rhodopseudomonas sp. AAP120 OX=1523430 GN=IP86_26345 PE=4 SV=1	0.117864	0.0878359
tr|A0A318TAQ9|A0A318TAQ9_9BRAD	9BRAD	3	Uncharacterized protein YjbJ (UPF0337 family) OS=Rhodopseudomonas faecalis OX=99655 GN=BJ122_11582 PE=3 SV=1	0.59172	0.325847
tr|A0A318THU0|A0A318THU0_9BRAD	9BRAD	2	Uncharacterized protein YjbJ (UPF0337 family) OS=Rhodopseudomonas faecalis OX=99655 GN=BJ122_1229 PE=3 SV=1	1.30718	0.112483
tr|A0A318TFS8|A0A318TFS8_9BRAD	9BRAD	3	Universal stress protein family protein OS=Rhodopseudomonas faecalis OX=99655 GN=BJ122_11558 PE=3 SV=1	0.368826	0.00126069
tr|A0A318TDD9|A0A318TDD9_9BRAD	9BRAD	6	Uroporphyrinogen decarboxylase OS=Rhodopseudomonas faecalis OX=99655 GN=hemE PE=3 SV=1	1.57629	0.00488464
tr|A0A318TDH0|A0A318TDH0_9BRAD	9BRAD	2	Uroporphyrinogen-III synthase OS=Rhodopseudomonas faecalis OX=99655 GN=BJ122_11622 PE=3 SV=1	0.563948	0.0359022
tr|A0A318TRQ0|A0A318TRQ0_9BRAD	9BRAD	2	UTP--glucose-1-phosphate uridylyltransferase OS=Rhodopseudomonas faecalis OX=99655 GN=BJ122_103240 PE=3 SV=1	0.798136	0.255537
tr|A0A318TDF8|A0A318TDF8_9BRAD	9BRAD	5	Valine--tRNA ligase OS=Rhodopseudomonas faecalis OX=99655 GN=valS PE=3 SV=1	0.384384	0.000811845
tr|A0A318TCI4|A0A318TCI4_9BRAD	9BRAD	1	Winged helix family two component transcriptional regulator OS=Rhodopseudomonas faecalis OX=99655 GN=BJ122_11286 PE=4 SV=1	0.356105	0.0258832
tr|A0A318T6U8|A0A318T6U8_9BRAD	9BRAD	5	Xanthine dehydrogenase molybdenum binding subunit apoprotein OS=Rhodopseudomonas faecalis OX=99655 GN=BJ122_13620 PE=4 SV=1	0.438822	0.0153278

## Sheet: R. capsulatus
ID_PROT	species	# peptides	Name	0,4V/0V norm	p value
tr|A0A7H0XUY6|A0A7H0XUY6_RHOCA	RHOCA	1	Phosphoenolpyruvate carboxykinase (ATP) OS=Rhodobacter capsulatus OX=1061 GN=pckA PE=3 SV=1	1.13007	0.783111
tr|A0A7H0Y0E2|A0A7H0Y0E2_RHOCA	RHOCA	1	Fructose-1,6-bisphosphatase class 1 OS=Rhodobacter capsulatus OX=1061 GN=fbp PE=3 SV=1	0.267032	0.0137357
tr|A0A7H0Y0R0|A0A7H0Y0R0_RHOCA	RHOCA	3	Fructose-bisphosphate aldolase class I OS=Rhodobacter capsulatus OX=1061 GN=H9N28_07605 PE=3 SV=1	0.720196	0.143996
tr|A0A1G7HQ19|A0A1G7HQ19_RHOCA	RHOCA	3	Enolase OS=Rhodobacter capsulatus OX=1061 GN=eno PE=3 SV=1	1.10824	0.649009
tr|A0A4U1JPF3|A0A4U1JPF3_RHOCA	RHOCA	1	Cytochrome C OS=Rhodobacter capsulatus OX=1061 GN=FBT96_12140 PE=4 SV=1	0.903447	0.774795
tr|A0A7H0XUS3|A0A7H0XUS3_RHOCA	RHOCA	3	Cytochrome c1 OS=Rhodobacter capsulatus OX=1061 GN=H9N28_13620 PE=4 SV=1	2.1447	2.53583e-06
tr|A0A0Q0QW64|A0A0Q0QW64_RHOCA	RHOCA	1	Cytochrome c556 OS=Rhodobacter capsulatus OX=1061 GN=SAMN04244550_02505 PE=4 SV=1	7.25937	0.000213023
tr|A0A7H0XXE9|A0A7H0XXE9_RHOCA	RHOCA	6	Porin OS=Rhodobacter capsulatus OX=1061 GN=H9N28_01315 PE=4 SV=1	1.73335	0.0360902
tr|A0A7H0XVR5|A0A7H0XVR5_RHOCA	RHOCA	1	Acetyl-CoA C-acetyltransferase OS=Rhodobacter capsulatus OX=1061 GN=H9N28_15470 PE=3 SV=1	4.2198	0.0107423
tr|A0A4U1JQT2|A0A4U1JQT2_RHOCA	RHOCA	2	Phasin OS=Rhodobacter capsulatus OX=1061 GN=FBT96_09725 PE=4 SV=1	1.27359	0.508273
tr|A0A0Q0WES2|A0A0Q0WES2_RHOCA	RHOCA	2	Citrate synthase OS=Rhodobacter capsulatus OX=1061 GN=SAMN04244550_00335 PE=3 SV=1	1.25602	0.168586
tr|A0A7H0XTN7|A0A7H0XTN7_RHOCA	RHOCA	6	Isocitrase OS=Rhodobacter capsulatus OX=1061 GN=H9N28_11425 PE=4 SV=1	0.745229	0.229538
tr|A0A4V5PP73|A0A4V5PP73_RHOCA	RHOCA	2	Malate dehydrogenase OS=Rhodobacter capsulatus OX=1061 GN=mdh PE=3 SV=1	2.23193	0.0103267
tr|A0A1G7PCR9|A0A1G7PCR9_RHOCA	RHOCA	1	Malate synthase OS=Rhodobacter capsulatus OX=1061 GN=SAMN04244550_02939 PE=3 SV=1	0.20712	0.00089845
tr|A0A7H0XYS7|A0A7H0XYS7_RHOCA	RHOCA	1	Succinate dehydrogenase flavoprotein subunit OS=Rhodobacter capsulatus OX=1061 GN=H9N28_03865 PE=3 SV=1	0.773425	0.405067
tr|A0A7H0XYR5|A0A7H0XYR5_RHOCA	RHOCA	5	Succinate--CoA ligase [ADP-forming] subunit beta OS=Rhodobacter capsulatus OX=1061 GN=sucC PE=3 SV=1	0.746817	0.106055
tr|A0A7H0XYS0|A0A7H0XYS0_RHOCA	RHOCA	2	Dihydrolipoyllysine-residue succinyltransferase component of 2-oxoglutarate dehydrogenase complex OS=Rhodobacter capsulatus OX=1061 GN=odhB PE=3 SV=1	0.490324	0.0400086
tr|A0A1G7PDP7|A0A1G7PDP7_RHOCA	RHOCA	1	2-methylcitrate dehydratase OS=Rhodobacter capsulatus OX=1061 GN=SAMN04244550_02949 PE=3 SV=1	1.68421	0.3598
tr|A0A7H0XX24|A0A7H0XX24_RHOCA	RHOCA	1	3'(2'),5'-bisphosphate nucleotidase CysQ OS=Rhodobacter capsulatus OX=1061 GN=cysQ PE=3 SV=1	0.785625	0.375879
tr|A0A0Q0UF03|A0A0Q0UF03_RHOCA	RHOCA	1	3,4-dihydroxy-2-butanone 4-phosphate synthase OS=Rhodobacter capsulatus OX=1061 GN=ribB PE=3 SV=1	0.85093	0.594067
tr|A0A7H0Y1I7|A0A7H0Y1I7_RHOCA	RHOCA	6	30S ribosomal protein S1 OS=Rhodobacter capsulatus OX=1061 GN=rpsA PE=3 SV=1	1.93484	0.00053995
tr|A0A0N8VEY8|A0A0N8VEY8_RHOCA	RHOCA	1	30S ribosomal protein S13 OS=Rhodobacter capsulatus OX=1061 GN=rpsM PE=3 SV=1	3.53199	0.0097381
tr|A0A0Q0VIT1|A0A0Q0VIT1_RHOCA	RHOCA	1	30S ribosomal protein S2 OS=Rhodobacter capsulatus OX=1061 GN=rpsB PE=3 SV=1	0.836047	0.740736
tr|A0A0Q0WBR2|A0A0Q0WBR2_RHOCA	RHOCA	2	30S ribosomal protein S4 OS=Rhodobacter capsulatus OX=1061 GN=rpsD PE=3 SV=1	2.64509	0.00336697
tr|A0A0Q0QM60|A0A0Q0QM60_RHOCA	RHOCA	1	30S ribosomal protein S6 OS=Rhodobacter capsulatus OX=1061 GN=rpsF PE=3 SV=1	3.9894	0.00321505
tr|A0A7H0XVB3|A0A7H0XVB3_RHOCA	RHOCA	1	3-hydroxy-5-phosphonooxypentane-2,4-dione thiolase OS=Rhodobacter capsulatus OX=1061 GN=lsrF PE=4 SV=1	1.67263	0.0693787
tr|A0A7H0XXK9|A0A7H0XXK9_RHOCA	RHOCA	2	50S ribosomal protein L15 OS=Rhodobacter capsulatus OX=1061 GN=rplO PE=3 SV=1	4.40803	0.0101762
tr|A0A0Q0V973|A0A0Q0V973_RHOCA	RHOCA	2	50S ribosomal protein L16 OS=Rhodobacter capsulatus OX=1061 GN=rplP PE=3 SV=1	1.48828	0.0929242
tr|A0A4V5PNY6|A0A4V5PNY6_RHOCA	RHOCA	1	50S ribosomal protein L23 OS=Rhodobacter capsulatus OX=1061 GN=rplW PE=3 SV=1	0.158555	0.000828421
tr|A0A0N8VEZ1|A0A0N8VEZ1_RHOCA	RHOCA	2	50S ribosomal protein L3 OS=Rhodobacter capsulatus OX=1061 GN=rplC PE=3 SV=1	6.24586	0.00706777
tr|A0A1G7FVM3|A0A1G7FVM3_RHOCA	RHOCA	2	50S ribosomal protein L6 OS=Rhodobacter capsulatus OX=1061 GN=rplF PE=3 SV=1	0.214986	0.000113191
tr|A0A4U1JV97|A0A4U1JV97_RHOCA	RHOCA	1	50S ribosomal subunit assembly factor BipA OS=Rhodobacter capsulatus OX=1061 GN=typA PE=3 SV=1	1.21577	0.52642
tr|A0A0Q0QY72|A0A0Q0QY72_RHOCA	RHOCA	1	5-aminolevulinate synthase OS=Rhodobacter capsulatus OX=1061 GN=SAMN04244550_03519 PE=3 SV=1	0.656928	0.147954
tr|A0A4U1JWS3|A0A4U1JWS3_RHOCA	RHOCA	3	60 kDa chaperonin OS=Rhodobacter capsulatus OX=1061 GN=groL PE=3 SV=1	2.61822	0.0055718
tr|A0A4U1JU30|A0A4U1JU30_RHOCA	RHOCA	1	ABC transporter substrate-binding protein OS=Rhodobacter capsulatus OX=1061 GN=FBT96_05155 PE=4 SV=1	2.857	0.000905331
tr|A0A7H0Y0F8|A0A7H0Y0F8_RHOCA	RHOCA	3	ABC transporter substrate-binding protein OS=Rhodobacter capsulatus OX=1061 GN=H9N28_07010 PE=4 SV=1	5.82124	0.00239307
tr|A0A7H0Y1G8|A0A7H0Y1G8_RHOCA	RHOCA	1	ABC transporter substrate-binding protein OS=Rhodobacter capsulatus OX=1061 GN=H9N28_10480 PE=4 SV=1	0.602403	0.191438
tr|A0A7H0XVR6|A0A7H0XVR6_RHOCA	RHOCA	4	Acetoacetyl-CoA reductase OS=Rhodobacter capsulatus OX=1061 GN=phbB PE=3 SV=1	0.679484	0.0613973
tr|A0A7H0XZN9|A0A7H0XZN9_RHOCA	RHOCA	2	Acetolactate synthase OS=Rhodobacter capsulatus OX=1061 GN=H9N28_05540 PE=3 SV=1	0.703793	0.179588
tr|A0A7H0XV08|A0A7H0XV08_RHOCA	RHOCA	3	Acetyl-coenzyme A synthetase OS=Rhodobacter capsulatus OX=1061 GN=acs PE=3 SV=1	0.718323	0.024046
tr|A0A7H0XS63|A0A7H0XS63_RHOCA	RHOCA	1	Aconitate hydratase OS=Rhodobacter capsulatus OX=1061 GN=acnA PE=3 SV=1	0.288905	0.00147887
tr|A0A7H0XW33|A0A7H0XW33_RHOCA	RHOCA	1	Acyl-CoA/acyl-ACP dehydrogenase OS=Rhodobacter capsulatus OX=1061 GN=H9N28_16100 PE=3 SV=1	0.869602	0.704
tr|A0A0Q0VD10|A0A0Q0VD10_RHOCA	RHOCA	5	Adenosylhomocysteinase OS=Rhodobacter capsulatus OX=1061 GN=ahcY PE=3 SV=1	0.877609	0.320604
tr|A0A4U1JLV9|A0A4U1JLV9_RHOCA	RHOCA	1	Adenylosuccinate synthetase OS=Rhodobacter capsulatus OX=1061 GN=purA PE=3 SV=1	0.241921	0.0698553
tr|A0A1G7FDY8|A0A1G7FDY8_RHOCA	RHOCA	1	Alanine dehydrogenase OS=Rhodobacter capsulatus OX=1061 GN=SAMN04244550_00953 PE=3 SV=1	1.59829	0.132731
tr|A0A7H0XXM3|A0A7H0XXM3_RHOCA	RHOCA	4	Amino acid ABC transporter substrate-binding protein OS=Rhodobacter capsulatus OX=1061 GN=H9N28_01700 PE=3 SV=1	1.63014	0.103701
tr|A0A7H0Y186|A0A7H0Y186_RHOCA	RHOCA	2	Arginine biosynthesis bifunctional protein ArgJ OS=Rhodobacter capsulatus OX=1061 GN=argJ PE=3 SV=1	0.868385	0.756984
tr|A0A7H0XXA1|A0A7H0XXA1_RHOCA	RHOCA	2	Argininosuccinate synthase OS=Rhodobacter capsulatus OX=1061 GN=argG PE=3 SV=1	1.34708	0.396773
tr|A0A7H0XV71|A0A7H0XV71_RHOCA	RHOCA	2	ATP synthase epsilon chain OS=Rhodobacter capsulatus OX=1061 GN=atpC PE=3 SV=1	1.8448	0.00936959
tr|A0A0Q0QMK5|A0A0Q0QMK5_RHOCA	RHOCA	3	ATP synthase gamma chain OS=Rhodobacter capsulatus OX=1061 GN=atpG PE=3 SV=1	0.956525	0.824032
tr|A0A0Q0QUZ8|A0A0Q0QUZ8_RHOCA	RHOCA	1	ATP synthase subunit beta OS=Rhodobacter capsulatus OX=1061 GN=atpD PE=3 SV=1	3.33611	0.0319133
tr|A0A7H0XV75|A0A7H0XV75_RHOCA	RHOCA	1	ATP synthase subunit delta OS=Rhodobacter capsulatus OX=1061 GN=atpH PE=3 SV=1	3.11635	0.00368212
tr|A0A0Q0UCL4|A0A0Q0UCL4_RHOCA	RHOCA	1	ATP-dependent zinc metalloprotease FtsH OS=Rhodobacter capsulatus OX=1061 GN=ftsH PE=3 SV=1	0.88034	0.804623
tr|A0A0N8VEF9|A0A0N8VEF9_RHOCA	RHOCA	2	Bacterioferritin OS=Rhodobacter capsulatus OX=1061 GN=SAMN04244550_01805 PE=3 SV=1	1.24902	0.242396
tr|A0A7H0XWR0|A0A7H0XWR0_RHOCA	RHOCA	1	Beta sliding clamp OS=Rhodobacter capsulatus OX=1061 GN=H9N28_00010 PE=3 SV=1	0.687173	0.247653
tr|A0A7H0XUH9|A0A7H0XUH9_RHOCA	RHOCA	1	Beta-ketoacyl-ACP synthase I OS=Rhodobacter capsulatus OX=1061 GN=fabB PE=3 SV=1	0.673407	0.398688
tr|A0A7H0XYX8|A0A7H0XYX8_RHOCA	RHOCA	2	BMP family ABC transporter substrate-binding protein OS=Rhodobacter capsulatus OX=1061 GN=H9N28_04130 PE=4 SV=1	6.34068	0.00159999
tr|A0A7H0XVW3|A0A7H0XVW3_RHOCA	RHOCA	3	BMP family ABC transporter substrate-binding protein OS=Rhodobacter capsulatus OX=1061 GN=H9N28_15735 PE=3 SV=1	0.846742	0.351633
tr|A0A1G7E1D2|A0A1G7E1D2_RHOCA	RHOCA	1	Branched-chain amino acid transport system substrate-binding protein OS=Rhodobacter capsulatus OX=1061 GN=SAMN04244550_00615 PE=4 SV=1	0.828469	0.454731
tr|A0A1G7KLF3|A0A1G7KLF3_RHOCA	RHOCA	1	Branched-chain-amino-acid aminotransferase OS=Rhodobacter capsulatus OX=1061 GN=ilvE PE=3 SV=1	0.218178	0.0499557
tr|A0A0Q0VHT0|A0A0Q0VHT0_RHOCA	RHOCA	2	Chaperone protein DnaK OS=Rhodobacter capsulatus OX=1061 GN=dnaK PE=2 SV=1	1.17049	0.549708
tr|A0A7H0XX61|A0A7H0XX61_RHOCA	RHOCA	1	Complex I NDUFA9 subunit family protein OS=Rhodobacter capsulatus OX=1061 GN=H9N28_00850 PE=4 SV=1	1.28113	0.592879
tr|A0A7H0XWH4|A0A7H0XWH4_RHOCA	RHOCA	6	D-3-phosphoglycerate dehydrogenase OS=Rhodobacter capsulatus OX=1061 GN=H9N28_16875 PE=3 SV=1	0.800934	0.097932
tr|A0A0Q0QK62|A0A0Q0QK62_RHOCA	RHOCA	2	DNA-binding protein H-NS OS=Rhodobacter capsulatus OX=1061 GN=SAMN04244550_00764 PE=3 SV=1	0.305743	1.45367e-06
tr|A0A7H0XXH9|A0A7H0XXH9_RHOCA	RHOCA	3	DNA-directed RNA polymerase subunit beta OS=Rhodobacter capsulatus OX=1061 GN=rpoB PE=3 SV=1	0.25122	0.00167758
tr|A0A4U1JS31|A0A4U1JS31_RHOCA	RHOCA	2	DNA-directed RNA polymerase subunit beta' OS=Rhodobacter capsulatus OX=1061 GN=rpoC PE=3 SV=1	0.721273	0.304035
tr|A0A0Q0UJY1|A0A0Q0UJY1_RHOCA	RHOCA	1	DNA-directed RNA polymerase subunit omega OS=Rhodobacter capsulatus OX=1061 GN=rpoZ PE=3 SV=1	0.713862	0.259794
tr|A0A7H0XXB9|A0A7H0XXB9_RHOCA	RHOCA	1	DsbA family protein OS=Rhodobacter capsulatus OX=1061 GN=H9N28_01165 PE=4 SV=1	0.672742	0.344999
tr|A0A7H0Y055|A0A7H0Y055_RHOCA	RHOCA	1	DsbA family protein OS=Rhodobacter capsulatus OX=1061 GN=H9N28_06465 PE=4 SV=1	0.224878	0.000426782
tr|A0A7H0XWV4|A0A7H0XWV4_RHOCA	RHOCA	2	DUF2125 domain-containing protein OS=Rhodobacter capsulatus OX=1061 GN=H9N28_00245 PE=4 SV=1	0.543288	0.0292417
tr|A0A7H0Y1H3|A0A7H0Y1H3_RHOCA	RHOCA	1	DUF4198 domain-containing protein OS=Rhodobacter capsulatus OX=1061 GN=H9N28_10975 PE=4 SV=1	1.98205	0.00417939
tr|A0A1G7ECU3|A0A1G7ECU3_RHOCA	RHOCA	6	D-xylose transport system substrate-binding protein OS=Rhodobacter capsulatus OX=1061 GN=SAMN04244550_00736 PE=4 SV=1	2.55021	0.00116048
tr|A0A0Q0WGA1|A0A0Q0WGA1_RHOCA	RHOCA	1	Electron transfer flavoprotein beta subunit OS=Rhodobacter capsulatus OX=1061 GN=FBT96_00060 PE=3 SV=1	1.06862	0.751072
tr|A0A7H0XX43|A0A7H0XX43_RHOCA	RHOCA	2	Electron transfer flavoprotein subunit alpha/FixB family protein OS=Rhodobacter capsulatus OX=1061 GN=H9N28_00730 PE=3 SV=1	0.482253	0.0675481
tr|A0A7H0XXI4|A0A7H0XXI4_RHOCA	RHOCA	4	Elongation factor G OS=Rhodobacter capsulatus OX=1061 GN=fusA PE=3 SV=1	1.52879	0.0148227
tr|A0A1G7JXI9|A0A1G7JXI9_RHOCA	RHOCA	1	Elongation factor G OS=Rhodobacter capsulatus OX=1061 GN=SAMN04244550_01997 PE=3 SV=1	3.02554	0.0352817
tr|A0A7H0XX47|A0A7H0XX47_RHOCA	RHOCA	6	Elongation factor Tu OS=Rhodobacter capsulatus OX=1061 GN=tuf PE=3 SV=1	1.74416	0.0273722
tr|A0A0Q0VIF7|A0A0Q0VIF7_RHOCA	RHOCA	2	Erythritol transport system substrate-binding protein OS=Rhodobacter capsulatus OX=1061 GN=SAMN04244550_02480 PE=4 SV=1	1.95314	0.000451511
tr|A0A7H0XUX7|A0A7H0XUX7_RHOCA	RHOCA	1	Fumarate hydratase class II OS=Rhodobacter capsulatus OX=1061 GN=fumC PE=3 SV=1	0.595292	0.068698
tr|A0A0Q0QM51|A0A0Q0QM51_RHOCA	RHOCA	1	Glutamine synthetase OS=Rhodobacter capsulatus OX=1061 GN=SAMN04244550_01569 PE=3 SV=1	1.59362	0.133377
tr|A0A0Q0UDF3|A0A0Q0UDF3_RHOCA	RHOCA	5	Glyceraldehyde-3-phosphate dehydrogenase OS=Rhodobacter capsulatus OX=1061 GN=SAMN04244550_00528 PE=3 SV=1	0.808423	0.209509
tr|A0A0Q0UEJ4|A0A0Q0UEJ4_RHOCA	RHOCA	3	Glycine betaine/proline transport system substrate-binding protein OS=Rhodobacter capsulatus OX=1061 GN=SAMN04244550_01787 PE=4 SV=1	0.883873	0.499101
tr|A0A0N8VFD2|A0A0N8VFD2_RHOCA	RHOCA	1	HemY protein OS=Rhodobacter capsulatus OX=1061 GN=SAMN04244550_00697 PE=4 SV=1	0.323659	0.000982988
tr|A0A7H0XW65|A0A7H0XW65_RHOCA	RHOCA	2	Homocysteine S-methyltransferase family protein OS=Rhodobacter capsulatus OX=1061 GN=H9N28_16270 PE=4 SV=1	0.426786	0.00352129
tr|A0A7H0Y045|A0A7H0Y045_RHOCA	RHOCA	1	Inosine-5'-monophosphate dehydrogenase OS=Rhodobacter capsulatus OX=1061 GN=guaB PE=3 SV=1	0.812133	0.555484
tr|A0A7H0Y0H4|A0A7H0Y0H4_RHOCA	RHOCA	1	Invasion associated locus B family protein OS=Rhodobacter capsulatus OX=1061 GN=H9N28_07095 PE=4 SV=1	1.62173	0.222228
tr|A0A7H0Y0T8|A0A7H0Y0T8_RHOCA	RHOCA	1	Malonyl CoA-acyl carrier protein transacylase OS=Rhodobacter capsulatus OX=1061 GN=fabD PE=3 SV=1	0.284226	0.00291435
tr|A0A0Q0QNE0|A0A0Q0QNE0_RHOCA	RHOCA	1	Methylisocitrate lyase OS=Rhodobacter capsulatus OX=1061 GN=SAMN04244550_02951 PE=3 SV=1	0.461417	0.0384209
tr|A0A0Q0QHC9|A0A0Q0QHC9_RHOCA	RHOCA	1	NAD(P)-dependent dehydrogenase, short-chain alcohol dehydrogenase family OS=Rhodobacter capsulatus OX=1061 GN=SAMN04244550_01019 PE=3 SV=1	3.18505	0.0141358
tr|A0A4U1JPV4|A0A4U1JPV4_RHOCA	RHOCA	2	NAD-dependent succinate-semialdehyde dehydrogenase OS=Rhodobacter capsulatus OX=1061 GN=FBT96_11435 PE=3 SV=1	1.17795	0.296606
tr|A0A7H0XYW1|A0A7H0XYW1_RHOCA	RHOCA	2	Nickel-dependent hydrogenase large subunit OS=Rhodobacter capsulatus OX=1061 GN=H9N28_04040 PE=3 SV=1	0.167265	0.334787
tr|A0A0Q0VG84|A0A0Q0VG84_RHOCA	RHOCA	1	Nucleotide-binding universal stress protein, UspA family OS=Rhodobacter capsulatus OX=1061 GN=SAMN04244550_01282 PE=3 SV=1	0.276119	0.0508746
tr|A0A0Q1A094|A0A0Q1A094_RHOCA	RHOCA	1	NYN domain-containing protein OS=Rhodobacter capsulatus OX=1061 GN=FBT96_00155 PE=4 SV=1	0.470799	0.0114427
tr|A0A7H0XU39|A0A7H0XU39_RHOCA	RHOCA	3	OmpA family protein OS=Rhodobacter capsulatus OX=1061 GN=H9N28_12295 PE=4 SV=1	0.499271	8.58713e-05
tr|A0A0Q0QY99|A0A0Q0QY99_RHOCA	RHOCA	1	Orotidine 5'-phosphate decarboxylase OS=Rhodobacter capsulatus OX=1061 GN=pyrF PE=3 SV=1	0.953955	0.857118
tr|A0A7H0XZW6|A0A7H0XZW6_RHOCA	RHOCA	2	Outer membrane protein assembly factor BamA OS=Rhodobacter capsulatus OX=1061 GN=bamA PE=3 SV=1	0.800573	0.240225
tr|A0A7H0XXB0|A0A7H0XXB0_RHOCA	RHOCA	1	Parvulin-like PPIase OS=Rhodobacter capsulatus OX=1061 GN=H9N28_01120 PE=3 SV=1	0.712247	0.514311
tr|A0A4U1JRP9|A0A4U1JRP9_RHOCA	RHOCA	1	Peptidoglycan-associated protein OS=Rhodobacter capsulatus OX=1061 GN=pal PE=3 SV=1	1.14554	0.606013
tr|A0A0Q0QM20|A0A0Q0QM20_RHOCA	RHOCA	1	Peptidyl-prolyl cis-trans isomerase OS=Rhodobacter capsulatus OX=1061 GN=SAMN04244550_01537 PE=3 SV=1	1.09581	0.75062
tr|A0A7H0XZA1|A0A7H0XZA1_RHOCA	RHOCA	1	Phosphatidylserine decarboxylase proenzyme OS=Rhodobacter capsulatus OX=1061 GN=psd PE=3 SV=1	0.272856	0.0317175
tr|A0A0Q0QVZ0|A0A0Q0QVZ0_RHOCA	RHOCA	2	Phosphoglycerate kinase OS=Rhodobacter capsulatus OX=1061 GN=pgk PE=3 SV=1	1.60176	0.060422
tr|A0A0Q0WMJ9|A0A0Q0WMJ9_RHOCA	RHOCA	1	Phosphoribulokinase OS=Rhodobacter capsulatus OX=1061 GN=SAMN04244550_01411 PE=3 SV=1	1.78561	0.252703
tr|A0A0N8VFT4|A0A0N8VFT4_RHOCA	RHOCA	6	Photosynthetic reaction center H subunit OS=Rhodobacter capsulatus OX=1061 GN=SAMN04244550_01231 PE=4 SV=1	1.86602	0.00582989
tr|A0A0E2PGB4|A0A0E2PGB4_RHOCA	RHOCA	2	Phytoene dehydrogenase OS=Rhodobacter capsulatus Y262 OX=1415161 GN=U715_04590 PE=3 SV=1	2.24923	5.62993e-05
tr|A0A7H0Y188|A0A7H0Y188_RHOCA	RHOCA	7	Polyribonucleotide nucleotidyltransferase OS=Rhodobacter capsulatus OX=1061 GN=pnp PE=3 SV=1	0.908943	0.544634
tr|Q9AKR9|Q9AKR9_RHOCA	RHOCA	2	Porphobilinogen deaminase OS=Rhodobacter capsulatus OX=1061 GN=hemC PE=3 SV=1	1.30022	0.29525
tr|A0A0Q0UMD7|A0A0Q0UMD7_RHOCA	RHOCA	1	Predicted lipid-binding transport protein, Tim44 family OS=Rhodobacter capsulatus OX=1061 GN=SAMN04244550_00749 PE=4 SV=1	0.753332	0.664971
tr|A0A4U1JS52|A0A4U1JS52_RHOCA	RHOCA	1	Probable transaldolase OS=Rhodobacter capsulatus OX=1061 GN=fsa PE=3 SV=1	1.02559	0.933181
tr|A0A7H0XT06|A0A7H0XT06_RHOCA	RHOCA	2	Proline--tRNA ligase OS=Rhodobacter capsulatus OX=1061 GN=proS PE=3 SV=1	2.11054	0.000788215
tr|A0A4U1JMT6|A0A4U1JMT6_RHOCA	RHOCA	4	Protein HflC OS=Rhodobacter capsulatus OX=1061 GN=FBT96_15505 PE=3 SV=1	0.476262	0.00158376
tr|A0A7H0XST7|A0A7H0XST7_RHOCA	RHOCA	1	Protein HflK OS=Rhodobacter capsulatus OX=1061 GN=hflK PE=3 SV=1	0.946356	0.859214
tr|A0A1G7KVB9|A0A1G7KVB9_RHOCA	RHOCA	2	Putative hydroxymethylpyrimidine transport system substrate-binding protein OS=Rhodobacter capsulatus OX=1061 GN=SAMN04244550_02220 PE=4 SV=1	2.0943	0.00246624
tr|A0A1G7N8A1|A0A1G7N8A1_RHOCA	RHOCA	3	Putative spermidine/putrescine transport system substrate-binding protein OS=Rhodobacter capsulatus OX=1061 GN=SAMN04244550_02690 PE=3 SV=1	2.31516	0.00669492
tr|A0A0Q0QTW5|A0A0Q0QTW5_RHOCA	RHOCA	1	Putative spermidine/putrescine transport system substrate-binding protein OS=Rhodobacter capsulatus OX=1061 GN=SAMN04244550_02913 PE=4 SV=1	1.38434	0.192885
tr|Q8GEE6|Q8GEE6_RHOCA	RHOCA	1	Pyrophosphate phospho-hydrolase (Fragment) OS=Rhodobacter capsulatus OX=1061 PE=3 SV=1	0.465269	0.10091
tr|A0A0N8VFH9|A0A0N8VFH9_RHOCA	RHOCA	1	Reaction center protein M chain OS=Rhodobacter capsulatus OX=1061 GN=SAMN04244550_01266 PE=3 SV=1	2.19058	0.0033255
tr|A0A7H0XS77|A0A7H0XS77_RHOCA	RHOCA	1	Ribonuclease E OS=Rhodobacter capsulatus OX=1061 GN=rne PE=3 SV=1	0.576653	0.16544
tr|A0A0Q0VI98|A0A0Q0VI98_RHOCA	RHOCA	1	Ribose-phosphate pyrophosphokinase OS=Rhodobacter capsulatus OX=1061 GN=prs PE=3 SV=1	0.230914	0.000193149
tr|A0A0Q0R3B3|A0A0Q0R3B3_RHOCA	RHOCA	1	Ribosome-recycling factor OS=Rhodobacter capsulatus OX=1061 GN=frr PE=3 SV=1	0.896092	0.757318
tr|A0A7H0Y090|A0A7H0Y090_RHOCA	RHOCA	1	Sec translocon accessory complex subunit YajC OS=Rhodobacter capsulatus OX=1061 GN=yajC PE=3 SV=1	1.55698	0.0722538
tr|A0A0Q0QNB7|A0A0Q0QNB7_RHOCA	RHOCA	3	Spermidine/putrescine transport system substrate-binding protein OS=Rhodobacter capsulatus OX=1061 GN=SAMN04244550_02550 PE=3 SV=1	3.15262	0.00311701
tr|A0A0Q0QTT0|A0A0Q0QTT0_RHOCA	RHOCA	1	Spheroidene monooxygenase OS=Rhodobacter capsulatus OX=1061 GN=SAMN04244550_01250 PE=4 SV=1	0.348295	0.0106153
tr|A0A1G7MCK1|A0A1G7MCK1_RHOCA	RHOCA	1	Sulfide:quinone oxidoreductase OS=Rhodobacter capsulatus OX=1061 GN=SAMN04244550_02502 PE=4 SV=1	1.57886	0.194755
tr|A0A0N8VF37|A0A0N8VF37_RHOCA	RHOCA	1	Tat (Twin-arginine translocation) pathway signal sequence OS=Rhodobacter capsulatus OX=1061 GN=SAMN04244550_00281 PE=3 SV=1	1.97061	0.0750852
tr|A0A1G7MF17|A0A1G7MF17_RHOCA	RHOCA	3	Thiamine-binding periplasmic protein OS=Rhodobacter capsulatus OX=1061 GN=SAMN04244550_02521 PE=3 SV=1	0.923909	0.773676
tr|A0A7H0XV00|A0A7H0XV00_RHOCA	RHOCA	2	Thiamine-phosphate synthase OS=Rhodobacter capsulatus OX=1061 GN=thiE PE=3 SV=1	3.07326	1.69073e-05
tr|A0A0Q0UUU3|A0A0Q0UUU3_RHOCA	RHOCA	1	Thioredoxin peroxidase OS=Rhodobacter capsulatus OX=1061 GN=SAMN04244550_02053 PE=4 SV=1	0.759651	0.608323
tr|A0A7H0XW70|A0A7H0XW70_RHOCA	RHOCA	7	TonB-dependent receptor OS=Rhodobacter capsulatus OX=1061 GN=H9N28_16295 PE=3 SV=1	1.37062	0.0629894
tr|A0A0N8VEN0|A0A0N8VEN0_RHOCA	RHOCA	1	Transcription antitermination protein NusB OS=Rhodobacter capsulatus OX=1061 GN=nusB PE=3 SV=1	1.51582	0.194991
tr|A0A7H0Y174|A0A7H0Y174_RHOCA	RHOCA	3	Transketolase OS=Rhodobacter capsulatus OX=1061 GN=tkt PE=3 SV=1	0.696098	0.112689
tr|A0A7H0XXA7|A0A7H0XXA7_RHOCA	RHOCA	2	Translation initiation factor IF-2 OS=Rhodobacter capsulatus OX=1061 GN=infB PE=3 SV=1	1.84414	0.158051
tr|A0A0E2PUC4|A0A0E2PUC4_RHOCA	RHOCA	1	Trigger factor OS=Rhodobacter capsulatus Y262 OX=1415161 GN=tig PE=3 SV=1	0.323279	0.0109862
tr|A0A1G7JJX4|A0A1G7JJX4_RHOCA	RHOCA	1	Triosephosphate isomerase OS=Rhodobacter capsulatus OX=1061 GN=tpiA PE=3 SV=1	0.782744	0.130603
tr|A0A1G7E9F0|A0A1G7E9F0_RHOCA	RHOCA	1	Uncharacterized conserved protein OS=Rhodobacter capsulatus OX=1061 GN=SAMN04244550_00696 PE=4 SV=1	1.79001	0.0707433
tr|A0A0Q0QMD6|A0A0Q0QMD6_RHOCA	RHOCA	1	Uncharacterized conserved protein YaaN involved in tellurite resistance OS=Rhodobacter capsulatus OX=1061 GN=SAMN04244550_02415 PE=3 SV=1	0.668457	0.131662
tr|A0A4U1JTI5|A0A4U1JTI5_RHOCA	RHOCA	1	Uncharacterized protein OS=Rhodobacter capsulatus OX=1061 GN=FBT96_05750 PE=4 SV=1	3.15974	0.108182
tr|A0A0Q0QUG3|A0A0Q0QUG3_RHOCA	RHOCA	3	Uncharacterized protein OS=Rhodobacter capsulatus OX=1061 GN=SAMN04244550_03118 PE=4 SV=1	9.31463	0.00203424
tr|A0A1G7RRD8|A0A1G7RRD8_RHOCA	RHOCA	4	Uncharacterized protein OS=Rhodobacter capsulatus OX=1061 GN=SAMN04244550_03476 PE=4 SV=1	3.03211	0.00320892
tr|A0A7H0XTY6|A0A7H0XTY6_RHOCA	RHOCA	2	Uroporphyrinogen decarboxylase OS=Rhodobacter capsulatus OX=1061 GN=hemE PE=3 SV=1	0.605384	0.226355
tr|A0A0Q0ZZ02|A0A0Q0ZZ02_RHOCA	RHOCA	1	UTP--glucose-1-phosphate uridylyltransferase OS=Rhodobacter capsulatus OX=1061 GN=SAMN04244550_00845 PE=3 SV=1	1.77536	0.164776

## Sheet: Rhodobacter sp.
ID_PROT	species	# peptides	Name	0,4V/0V norm	P value
tr|A0A330H0F6|A0A330H0F6_9RHOB	9RHOB	3	Phosphoenolpyruvate carboxykinase (ATP) OS=Rhodobacter johrii OX=445629 GN=pckA PE=3 SV=1	1.20298	0.41393
tr|A0A330HEN0|A0A330HEN0_9RHOB	9RHOB	1	Ribulose bisphosphate carboxylase OS=Rhodobacter johrii OX=445629 GN=cbbM PE=3 SV=1	0.321916	0.012953
tr|A0A330H898|A0A330H898_9RHOB	9RHOB	2	Cytochrome C OS=Rhodobacter johrii OX=445629 GN=DDV93_16615 PE=4 SV=1	1.21573	0.28618
tr|A0A330H6E2|A0A330H6E2_9RHOB	9RHOB	2	Cytochrome c OS=Rhodobacter johrii OX=445629 GN=DDV93_20145 PE=4 SV=1	0.781315	0.115261
tr|A0A330HLV6|A0A330HLV6_9RHOB	9RHOB	1	Cytochrome c1 OS=Rhodobacter johrii OX=445629 GN=DDV93_04785 PE=4 SV=1	1.51642	0.158353
tr|A0A330HBE3|A0A330HBE3_9RHOB	9RHOB	2	Ubiquinol-cytochrome c reductase iron-sulfur subunit OS=Rhodobacter johrii OX=445629 GN=petA PE=3 SV=1	1.91634	0.0194027
tr|A0A330HC69|A0A330HC69_9RHOB	9RHOB	2	Succinate--CoA ligase [ADP-forming] subunit alpha OS=Rhodobacter johrii OX=445629 GN=sucD PE=3 SV=1	2.65421	0.00576407
tr|A0A330H510|A0A330H510_9RHOB	9RHOB	1	(2Fe-2S)-binding protein OS=Rhodobacter johrii OX=445629 GN=DDV93_14170 PE=4 SV=1	0.986695	0.947983
tr|A0A1D9MAE0|A0A1D9MAE0_9RHOB	9RHOB	1	10 kDa chaperonin OS=Rhodobacter sp. LPB0142 OX=1850250 GN=groS PE=3 SV=1	1.94208	0.00258132
tr|A0A3D3JBV5|A0A3D3JBV5_9RHOB	9RHOB	1	30S ribosomal protein S10 (Fragment) OS=Rhodobacter sp. OX=1062 GN=DIS71_06620 PE=3 SV=1	0.587403	0.177676
tr|A0A330HGX1|A0A330HGX1_9RHOB	9RHOB	2	30S ribosomal protein S13 OS=Rhodobacter johrii OX=445629 GN=rpsM PE=3 SV=1	1.39795	0.107145
tr|V7EIF3|V7EIF3_9RHOB	9RHOB	1	30S ribosomal protein S18 OS=Rhodobacter sp. CACIA14H1 OX=1408890 GN=rpsR PE=3 SV=1	3.07691	0.0942915
tr|V7EJ15|V7EJ15_9RHOB	9RHOB	1	30S ribosomal protein S19 OS=Rhodobacter sp. CACIA14H1 OX=1408890 GN=rpsS PE=3 SV=1	1.22992	0.272151
tr|A0A1N7KX00|A0A1N7KX00_9RHOB	9RHOB	1	30S ribosomal protein S19 OS=Rhodobacter vinaykumarii OX=407234 GN=rpsS PE=3 SV=1	1.08619	0.817955
tr|A0A239CJ44|A0A239CJ44_9RHOB	9RHOB	2	30S ribosomal protein S2 OS=Rhodobacter megalophilus OX=418630 GN=rpsB PE=3 SV=1	2.98277	0.000572591
tr|A0A330HDJ2|A0A330HDJ2_9RHOB	9RHOB	1	30S ribosomal protein S3 OS=Rhodobacter johrii OX=445629 GN=rpsC PE=3 SV=1	4.99585	8.7767e-05
tr|A0A330HLX9|A0A330HLX9_9RHOB	9RHOB	1	30S ribosomal protein S4 OS=Rhodobacter johrii OX=445629 GN=rpsD PE=3 SV=1	3.1795	1.09673e-05
tr|C8S4Z8|C8S4Z8_9RHOB	9RHOB	1	30S ribosomal protein S5 OS=Rhodobacter sp. SW2 OX=371731 GN=rpsE PE=3 SV=1	0.959946	0.827069
tr|A0A330H4P3|A0A330H4P3_9RHOB	9RHOB	3	30S ribosomal protein S9 OS=Rhodobacter johrii OX=445629 GN=rpsI PE=3 SV=1	2.71514	2.64086e-05
tr|A0A421BVP5|A0A421BVP5_9RHOB	9RHOB	1	3-isopropylmalate dehydratase small subunit OS=Sinirhodobacter hankyongi OX=2294033 GN=leuD PE=3 SV=1	0.863134	0.625217
tr|A0A330HJH5|A0A330HJH5_9RHOB	9RHOB	3	50S ribosomal protein L15 OS=Rhodobacter johrii OX=445629 GN=rplO PE=3 SV=1	1.78549	0.00780525
tr|A0A330HDR3|A0A330HDR3_9RHOB	9RHOB	3	50S ribosomal protein L2 OS=Rhodobacter johrii OX=445629 GN=rplB PE=3 SV=1	1.13187	0.431905
tr|A0A318U3C7|A0A318U3C7_9RHOB	9RHOB	2	50S ribosomal protein L2 OS=Rhodobacter viridis OX=1054202 GN=rplB PE=3 SV=1	4.12395	8.75206e-05
tr|A0A330HI07|A0A330HI07_9RHOB	9RHOB	1	50S ribosomal protein L25 OS=Rhodobacter johrii OX=445629 GN=rplY PE=3 SV=1	1.23307	0.163571
tr|A0A285TB67|A0A285TB67_9RHOB	9RHOB	1	50S ribosomal protein L33 OS=Rhodobacter maris OX=446682 GN=rpmG PE=3 SV=1	2.22692	0.261562
tr|A0A348MNE4|A0A348MNE4_9RHOB	9RHOB	1	50S ribosomal protein L34 OS=Rhodobacter sp. OX=1062 GN=rpmH PE=3 SV=1	1.58173	0.2772
tr|A0A330HED1|A0A330HED1_9RHOB	9RHOB	2	50S ribosomal protein L6 OS=Rhodobacter johrii OX=445629 GN=rplF PE=3 SV=1	0.670732	0.242354
tr|A0A6B3RLD0|A0A6B3RLD0_9RHOB	9RHOB	1	50S ribosomal protein L7/L12 OS=Rhodobacter sp. ETT8 OX=2709381 GN=rplL PE=3 SV=1	1.44878	0.302934
tr|A0A6M1MJS1|A0A6M1MJS1_9RHOB	9RHOB	1	50S ribosomal protein L7/L12 OS=Rhodobacter sp. SGA-6-6 OX=2710882 GN=rplL PE=3 SV=1	0.896962	0.799229
tr|A0A330HBG0|A0A330HBG0_9RHOB	9RHOB	5	50S ribosomal protein L9 OS=Rhodobacter johrii OX=445629 GN=rplI PE=3 SV=1	2.03497	9.24564e-05
tr|A0A330H2S6|A0A330H2S6_9RHOB	9RHOB	9	5-methyltetrahydropteroyltriglutamate--homocysteine methyltransferase OS=Rhodobacter johrii OX=445629 GN=metE PE=3 SV=1	0.982131	0.873399
tr|A0A330HH10|A0A330HH10_9RHOB	9RHOB	1	ABC transporter permease OS=Rhodobacter johrii OX=445629 GN=DDV93_00960 PE=4 SV=1	0.356231	0.0181331
tr|A0A330HFD5|A0A330HFD5_9RHOB	9RHOB	3	ABC transporter substrate-binding protein OS=Rhodobacter johrii OX=445629 GN=DDV93_04365 PE=3 SV=1	0.983092	0.90941
tr|A0A330HD31|A0A330HD31_9RHOB	9RHOB	1	ABC transporter substrate-binding protein OS=Rhodobacter johrii OX=445629 GN=DDV93_07820 PE=3 SV=1	0.0678164	0.00296485
tr|A0A330H9L8|A0A330H9L8_9RHOB	9RHOB	4	ABC transporter substrate-binding protein OS=Rhodobacter johrii OX=445629 GN=DDV93_10405 PE=3 SV=1	0.972689	0.861149
tr|A0A330HD67|A0A330HD67_9RHOB	9RHOB	2	ABC transporter substrate-binding protein OS=Rhodobacter johrii OX=445629 GN=DDV93_12205 PE=4 SV=1	0.526433	0.0516161
tr|A0A330H561|A0A330H561_9RHOB	9RHOB	1	ABC transporter substrate-binding protein OS=Rhodobacter johrii OX=445629 GN=DDV93_15950 PE=4 SV=1	1.48221	0.0471481
tr|A0A330HGJ8|A0A330HGJ8_9RHOB	9RHOB	4	ABC transporter substrate-binding protein OS=Rhodobacter johrii OX=445629 GN=DDV93_16870 PE=4 SV=1	1.15774	0.394485
tr|A0A330H5Q3|A0A330H5Q3_9RHOB	9RHOB	1	Amino acid ABC transporter OS=Rhodobacter johrii OX=445629 GN=DDV93_17005 PE=4 SV=1	1.55611	0.0799837
tr|A0A330HGY0|A0A330HGY0_9RHOB	9RHOB	9	Amino acid ABC transporter substrate-binding protein OS=Rhodobacter johrii OX=445629 GN=DDV93_03645 PE=4 SV=1	1.52173	0.00792821
tr|A0A330H7Q4|A0A330H7Q4_9RHOB	9RHOB	2	Antenna pigment protein alpha chain OS=Rhodobacter johrii OX=445629 GN=DDV93_17875 PE=3 SV=1	0.853297	0.474363
tr|A0A330HH35|A0A330HH35_9RHOB	9RHOB	1	Argininosuccinate synthase OS=Rhodobacter johrii OX=445629 GN=argG PE=3 SV=1	2.78678	0.0385408
tr|A0A330HC46|A0A330HC46_9RHOB	9RHOB	1	Aromatic amino acid aminotransferase OS=Rhodobacter johrii OX=445629 GN=DDV93_07400 PE=3 SV=1	1.23399	0.471337
tr|A0A330HGA9|A0A330HGA9_9RHOB	9RHOB	2	ATP synthase subunit alpha OS=Rhodobacter johrii OX=445629 GN=atpA PE=3 SV=1	1.77352	0.0132289
tr|A0A318TYK3|A0A318TYK3_9RHOB	9RHOB	2	ATP synthase subunit alpha OS=Rhodobacter viridis OX=1054202 GN=atpA PE=3 SV=1	2.19851	0.0471065
tr|A0A330HBV3|A0A330HBV3_9RHOB	9RHOB	1	ATP synthase subunit b OS=Rhodobacter johrii OX=445629 GN=atpF PE=3 SV=1	1.19218	0.450083
tr|A0A330HJF7|A0A330HJF7_9RHOB	9RHOB	4	ATP synthase subunit beta OS=Rhodobacter johrii OX=445629 GN=atpD PE=3 SV=1	3.10759	6.87683e-05
tr|A0A330HH37|A0A330HH37_9RHOB	9RHOB	1	ATP synthase subunit delta OS=Rhodobacter johrii OX=445629 GN=atpH PE=3 SV=1	0.470054	0.0268218
tr|A0A330GZU8|A0A330GZU8_9RHOB	9RHOB	2	BMP family ABC transporter substrate-binding protein OS=Rhodobacter johrii OX=445629 GN=DDV93_22270 PE=3 SV=1	2.16451	0.00184966
tr|A0A6M1MGG7|A0A6M1MGG7_9RHOB	9RHOB	1	BMP family ABC transporter substrate-binding protein OS=Rhodobacter sp. SGA-6-6 OX=2710882 GN=G5B31_00580 PE=3 SV=1	0.605937	0.174209
tr|A0A330HAS4|A0A330HAS4_9RHOB	9RHOB	2	Branched-chain amino acid ABC transporter substrate-binding protein OS=Rhodobacter johrii OX=445629 GN=DDV93_14405 PE=4 SV=1	1.53695	0.078782
tr|A0A330HBE7|A0A330HBE7_9RHOB	9RHOB	1	Chaperone protein DnaK OS=Rhodobacter johrii OX=445629 GN=dnaK PE=2 SV=1	1.05204	0.910152
tr|A0A330HGQ2|A0A330HGQ2_9RHOB	9RHOB	4	Choline ABC transporter substrate-binding protein OS=Rhodobacter johrii OX=445629 GN=DDV93_00440 PE=4 SV=1	0.540438	0.00185924
tr|A0A2T5KD21|A0A2T5KD21_9RHOB	9RHOB	1	Cobalamin biosynthesis protein CobW OS=Rhodobacter azotoformans OX=43057 GN=C8J28_10285 PE=3 SV=1	0.710195	0.231063
tr|A0A330HF08|A0A330HF08_9RHOB	9RHOB	2	Cobalt transporter OS=Rhodobacter johrii OX=445629 GN=DDV93_10640 PE=4 SV=1	1.30079	0.164184
tr|A0A330H139|A0A330H139_9RHOB	9RHOB	3	Copper-binding protein OS=Rhodobacter johrii OX=445629 GN=DDV93_20740 PE=4 SV=1	0.829123	0.199286
tr|A0A239F133|A0A239F133_9RHOB	9RHOB	1	CRISPR system Cascade subunit CasC OS=Rhodobacter megalophilus OX=418630 GN=SAMN05421763_10212 PE=4 SV=1	2.45224	0.000331057
tr|A0A330HB61|A0A330HB61_9RHOB	9RHOB	2	CsbD family protein OS=Rhodobacter johrii OX=445629 GN=DDV93_05415 PE=3 SV=1	1.52811	0.228851
tr|A0A330HF54|A0A330HF54_9RHOB	9RHOB	1	Cysteine synthase OS=Rhodobacter johrii OX=445629 GN=DDV93_06220 PE=4 SV=1	0.505849	0.0349794
tr|A0A330HCS0|A0A330HCS0_9RHOB	9RHOB	1	Cytochrome-c oxidase, cbb3-type subunit II OS=Rhodobacter johrii OX=445629 GN=ccoO PE=4 SV=1	1.09535	0.704358
tr|A0A330HDT8|A0A330HDT8_9RHOB	9RHOB	2	D-3-phosphoglycerate dehydrogenase OS=Rhodobacter johrii OX=445629 GN=DDV93_04990 PE=3 SV=1	1.85001	0.0211831
tr|A0A330HG17|A0A330HG17_9RHOB	9RHOB	2	DUF1013 domain-containing protein OS=Rhodobacter johrii OX=445629 GN=DDV93_08320 PE=4 SV=1	2.93152	0.00969772
tr|A0A330H9Y1|A0A330H9Y1_9RHOB	9RHOB	1	DUF2934 domain-containing protein OS=Rhodobacter johrii OX=445629 GN=DDV93_11105 PE=4 SV=1	0.686634	0.394552
tr|A0A330H1P1|A0A330H1P1_9RHOB	9RHOB	1	DUF892 domain-containing protein OS=Rhodobacter johrii OX=445629 GN=DDV93_18645 PE=4 SV=1	1.69805	0.0383675
tr|A0A330HH60|A0A330HH60_9RHOB	9RHOB	2	D-xylose ABC transporter substrate-binding protein OS=Rhodobacter johrii OX=445629 GN=xylF PE=4 SV=1	1.2333	0.220089
tr|A0A330H0G6|A0A330H0G6_9RHOB	9RHOB	1	Electron transfer flavoprotein subunit alpha/FixB family protein OS=Rhodobacter johrii OX=445629 GN=DDV93_21520 PE=3 SV=1	1.74903	0.235001
tr|A0A330H4M0|A0A330H4M0_9RHOB	9RHOB	2	Electron transfer flavoprotein subunit beta/FixA family protein OS=Rhodobacter johrii OX=445629 GN=DDV93_21525 PE=3 SV=1	0.946572	0.69157
tr|A0A330HJ86|A0A330HJ86_9RHOB	9RHOB	2	Electron transfer flavoprotein-ubiquinone oxidoreductase OS=Rhodobacter johrii OX=445629 GN=DDV93_03815 PE=4 SV=1	0.759154	0.343675
tr|A0A330H9H6|A0A330H9H6_9RHOB	9RHOB	2	Elongation factor Ts OS=Rhodobacter johrii OX=445629 GN=tsf PE=3 SV=1	1.54915	0.00972056
tr|A0A1D9MAQ9|A0A1D9MAQ9_9RHOB	9RHOB	1	Enoyl-[acyl-carrier-protein] reductase [NADH] OS=Rhodobacter sp. LPB0142 OX=1850250 GN=LPB142_05320 PE=3 SV=1	0.645649	0.19665
tr|A0A330HI42|A0A330HI42_9RHOB	9RHOB	1	Ferredoxin OS=Rhodobacter johrii OX=445629 GN=DDV93_01665 PE=4 SV=1	1.64085	0.215126
tr|A0A2T4JIH2|A0A2T4JIH2_9RHOB	9RHOB	1	Glutamyl-tRNA(Gln) amidotransferase subunit A OS=Rhodobacter veldkampii DSM 11550 OX=1185920 GN=gatA PE=3 SV=1	1.42184	0.154317
tr|A0A330HB80|A0A330HB80_9RHOB	9RHOB	1	Glutathione-dependent disulfide-bond oxidoreductase OS=Rhodobacter johrii OX=445629 GN=DDV93_12060 PE=4 SV=1	2.34008	0.000250795
tr|A0A330H595|A0A330H595_9RHOB	9RHOB	1	Glyceraldehyde-3-phosphate dehydrogenase OS=Rhodobacter johrii OX=445629 GN=gap PE=3 SV=1	1.39736	0.113894
tr|A0A330H2S2|A0A330H2S2_9RHOB	9RHOB	4	H-NS histone family protein OS=Rhodobacter johrii OX=445629 GN=DDV93_18080 PE=3 SV=1	1.62334	0.0640393
tr|A0A2T5JKA4|A0A2T5JKA4_9RHOB	9RHOB	3	Iron complex transport system substrate-binding protein OS=Rhodobacter azotoformans OX=43057 GN=C8J28_1442 PE=4 SV=1	4.16504	8.81766e-06
tr|A0A330HJG4|A0A330HJG4_9RHOB	9RHOB	1	Ketol-acid reductoisomerase (NADP(+)) OS=Rhodobacter johrii OX=445629 GN=ilvC PE=3 SV=1	1.16582	0.684946
tr|A0A330H0V3|A0A330H0V3_9RHOB	9RHOB	1	Nitrogenase molybdenum-iron protein beta chain OS=Rhodobacter johrii OX=445629 GN=nifK PE=3 SV=1	0.378471	0.250684
tr|A0A285S2R2|A0A285S2R2_9RHOB	9RHOB	1	Orotate phosphoribosyltransferase OS=Rhodobacter maris OX=446682 GN=pyrE PE=3 SV=1	0.648429	0.276121
tr|A0A330HD17|A0A330HD17_9RHOB	9RHOB	1	OsmC family peroxiredoxin OS=Rhodobacter johrii OX=445629 GN=DDV93_09005 PE=4 SV=1	0.551138	0.00182589
tr|A0A330H803|A0A330H803_9RHOB	9RHOB	2	Outer membrane protein assembly factor BamA OS=Rhodobacter johrii OX=445629 GN=bamA PE=3 SV=1	0.329534	0.0764026
tr|A0A330HBZ7|A0A330HBZ7_9RHOB	9RHOB	3	Parvulin-like PPIase OS=Rhodobacter johrii OX=445629 GN=DDV93_05920 PE=3 SV=1	1.0167	0.931614
tr|A0A330H296|A0A330H296_9RHOB	9RHOB	1	Peptide ABC transporter substrate-binding protein OS=Rhodobacter johrii OX=445629 GN=DDV93_18275 PE=3 SV=1	0.317467	0.0011639
tr|A0A330HGS6|A0A330HGS6_9RHOB	9RHOB	2	Peptidyl-prolyl cis-trans isomerase OS=Rhodobacter johrii OX=445629 GN=DDV93_01990 PE=3 SV=1	0.353701	0.00242643
tr|A0A330HHJ8|A0A330HHJ8_9RHOB	9RHOB	2	Phosphoglycerate kinase OS=Rhodobacter johrii OX=445629 GN=pgk PE=3 SV=1	0.633961	0.0333343
tr|A0A285SGD7|A0A285SGD7_9RHOB	9RHOB	2	Phosphomethylpyrimidine synthase OS=Rhodobacter maris OX=446682 GN=thiC PE=3 SV=1	1.19545	0.491285
tr|A0A330HG13|A0A330HG13_9RHOB	9RHOB	2	Polyamine ABC transporter substrate-binding protein OS=Rhodobacter johrii OX=445629 GN=DDV93_00245 PE=3 SV=1	1.52007	0.01811
tr|A0A330HHM5|A0A330HHM5_9RHOB	9RHOB	3	Polyribonucleotide nucleotidyltransferase OS=Rhodobacter johrii OX=445629 GN=pnp PE=3 SV=1	0.826525	0.253596
tr|A0A330HG46|A0A330HG46_9RHOB	9RHOB	3	Porphobilinogen deaminase OS=Rhodobacter johrii OX=445629 GN=hemC PE=3 SV=1	0.872531	0.132669
tr|A0A330HIG2|A0A330HIG2_9RHOB	9RHOB	1	PRC-barrel domain containing protein OS=Rhodobacter johrii OX=445629 GN=DDV93_01290 PE=4 SV=1	0.930652	0.681771
tr|A0A330HDW5|A0A330HDW5_9RHOB	9RHOB	1	Probable branched-chain-amino-acid aminotransferase OS=Rhodobacter johrii OX=445629 GN=DDV93_03755 PE=3 SV=1	0.850472	0.51365
tr|A0A330H531|A0A330H531_9RHOB	9RHOB	2	Probable cytosol aminopeptidase OS=Rhodobacter johrii OX=445629 GN=pepA PE=3 SV=1	1.17621	0.152764
tr|Q8GIC2|Q8GIC2_9RHOB	9RHOB	3	Reaction center protein M chain (Fragment) OS=Rhodobacter azotoformans OX=43057 GN=pufM PE=3 SV=1	1.74093	0.0508892
tr|A0A330HBR9|A0A330HBR9_9RHOB	9RHOB	5	Spheroidene monooxygenase OS=Rhodobacter johrii OX=445629 GN=DDV93_16490 PE=4 SV=1	1.51302	0.00843974
tr|A0A330HFG3|A0A330HFG3_9RHOB	9RHOB	1	Succinyl-CoA--3-ketoacid-CoA transferase OS=Rhodobacter johrii OX=445629 GN=DDV93_04520 PE=3 SV=1	2.25441	5.61728e-05
tr|A0A330HD18|A0A330HD18_9RHOB	9RHOB	1	Sugar ABC transporter substrate-binding protein OS=Rhodobacter johrii OX=445629 GN=DDV93_06840 PE=4 SV=1	2.47601	0.0038281
tr|A0A330HBW9|A0A330HBW9_9RHOB	9RHOB	2	Thiamine-binding periplasmic protein OS=Rhodobacter johrii OX=445629 GN=DDV93_04800 PE=3 SV=1	3.32456	0.000901702
tr|A0A330HIE6|A0A330HIE6_9RHOB	9RHOB	1	Tol-Pal system protein TolB OS=Rhodobacter johrii OX=445629 GN=tolB PE=3 SV=1	0.48012	0.107419
tr|A0A330H4Z7|A0A330H4Z7_9RHOB	9RHOB	1	Translation initiation factor IF-3 OS=Rhodobacter johrii OX=445629 GN=infC PE=3 SV=1	0.353056	0.0365588
tr|A0A330H776|A0A330H776_9RHOB	9RHOB	2	Transporter OS=Rhodobacter johrii OX=445629 GN=DDV93_12850 PE=4 SV=1	3.86085	5.50572e-06
tr|A0A330H5C9|A0A330H5C9_9RHOB	9RHOB	1	Transporter OS=Rhodobacter johrii OX=445629 GN=DDV93_16380 PE=3 SV=1	0.609095	0.443816
tr|A0A6M1TP81|A0A6M1TP81_9RHOB	9RHOB	1	TRAP transporter substrate-binding protein OS=Rhodobacter sp. HX-7-19 OX=2583234 GN=G5V65_02035 PE=3 SV=1	0.91023	0.618405
tr|A0A318U493|A0A318U493_9RHOB	9RHOB	2	Two-component system response regulator RegA OS=Rhodobacter viridis OX=1054202 GN=C8J30_102212 PE=4 SV=1	0.688793	0.048024
tr|A0A330HJL9|A0A330HJL9_9RHOB	9RHOB	2	Uncharacterized protein OS=Rhodobacter johrii OX=445629 GN=DDV93_01435 PE=4 SV=1	1.06771	0.876145
tr|A0A330HGQ3|A0A330HGQ3_9RHOB	9RHOB	7	Uncharacterized protein OS=Rhodobacter johrii OX=445629 GN=DDV93_01555 PE=3 SV=1	1.901	0.000562843
tr|A0A330HEQ6|A0A330HEQ6_9RHOB	9RHOB	1	Uncharacterized protein OS=Rhodobacter johrii OX=445629 GN=DDV93_10375 PE=4 SV=1	0.846285	0.53555
tr|A0A330HIC0|A0A330HIC0_9RHOB	9RHOB	5	Universal stress protein OS=Rhodobacter johrii OX=445629 GN=DDV93_08445 PE=3 SV=1	1.01993	0.855622
tr|A0A330H1T2|A0A330H1T2_9RHOB	9RHOB	1	Universal stress protein OS=Rhodobacter johrii OX=445629 GN=DDV93_18620 PE=3 SV=1	1.70009	0.0851581
tr|A0A318U339|A0A318U339_9RHOB	9RHOB	1	Uridylate kinase OS=Rhodobacter viridis OX=1054202 GN=pyrH PE=3 SV=1	0.114755	0.000383842

## Sheet: W. succinogenes 
ID_PROT	species	# peptides	Name	0,4V/0V norm	p value
sp|P17413|FRDC_WOLSU	WOLSU	1	Fumarate reductase cytochrome b subunit OS=Wolinella succinogenes (strain ATCC 29543 / DSM 1740 / LMG 7466 / NCTC 11488 / FDC 602W) OX=273121 GN=frdC PE=1 SV=1	0.485741	0.0451228
sp|P17412|FRDA_WOLSU	WOLSU	11	Fumarate reductase flavoprotein subunit OS=Wolinella succinogenes (strain ATCC 29543 / DSM 1740 / LMG 7466 / NCTC 11488 / FDC 602W) OX=273121 GN=frdA PE=1 SV=3	0.784709	0.0208054
sp|P17596|FRDB_WOLSU	WOLSU	8	Fumarate reductase iron-sulfur subunit OS=Wolinella succinogenes (strain ATCC 29543 / DSM 1740 / LMG 7466 / NCTC 11488 / FDC 602W) OX=273121 GN=frdB PE=1 SV=1	0.631423	0.00161108
tr|Q7MAL2|Q7MAL2_WOLSU	WOLSU	7	MALIC ENZYME OS=Wolinella succinogenes (strain ATCC 29543 / DSM 1740 / LMG 7466 / NCTC 11488 / FDC 602W) OX=273121 GN=WS0171 PE=3 SV=1	0.891414	0.182878
tr|Q7M9W0|Q7M9W0_WOLSU	WOLSU	2	3-oxoacyl-[acyl-carrier-protein] reductase OS=Wolinella succinogenes (strain ATCC 29543 / DSM 1740 / LMG 7466 / NCTC 11488 / FDC 602W) OX=273121 GN=FABG PE=3 SV=1	1.45268	0.0259521
tr|Q7M9L6|Q7M9L6_WOLSU	WOLSU	3	Phosphoenolpyruvate synthase OS=Wolinella succinogenes (strain ATCC 29543 / DSM 1740 / LMG 7466 / NCTC 11488 / FDC 602W) OX=273121 GN=WS0826 PE=3 SV=1	1.11748	0.27289
sp|Q7MAE2|CH10_WOLSU	WOLSU	2	10 kDa chaperonin OS=Wolinella succinogenes (strain ATCC 29543 / DSM 1740 / LMG 7466 / NCTC 11488 / FDC 602W) OX=273121 GN=groS PE=3 SV=1	0.9262	0.820858
tr|Q7M9P1|Q7M9P1_WOLSU	WOLSU	1	2,3,4,5-tetrahydropyridine-2,6-dicarboxylate N-succinyltransferase OS=Wolinella succinogenes (strain ATCC 29543 / DSM 1740 / LMG 7466 / NCTC 11488 / FDC 602W) OX=273121 GN=DAPD PE=3 SV=1	3.41649	0.00278223
tr|Q7MRG5|Q7MRG5_WOLSU	WOLSU	1	2Fe-2S ferredoxin-type domain-containing protein OS=Wolinella succinogenes (strain ATCC 29543 / DSM 1740 / LMG 7466 / NCTC 11488 / FDC 602W) OX=273121 GN=WS1382 PE=4 SV=1	0.931206	0.764856
tr|Q7M8Y5|Q7M8Y5_WOLSU	WOLSU	10	30S RIBOSOMAL PROTEIN S1 OS=Wolinella succinogenes (strain ATCC 29543 / DSM 1740 / LMG 7466 / NCTC 11488 / FDC 602W) OX=273121 GN=RPSA PE=4 SV=1	0.568844	0.000170982
sp|Q7MA55|RS12_WOLSU	WOLSU	1	30S ribosomal protein S12 OS=Wolinella succinogenes (strain ATCC 29543 / DSM 1740 / LMG 7466 / NCTC 11488 / FDC 602W) OX=273121 GN=rpsL PE=3 SV=1	0.54299	0.156592
sp|Q7M8F4|RS13_WOLSU	WOLSU	3	30S ribosomal protein S13 OS=Wolinella succinogenes (strain ATCC 29543 / DSM 1740 / LMG 7466 / NCTC 11488 / FDC 602W) OX=273121 GN=rpsM PE=3 SV=1	1.26389	0.102319
sp|Q7M8E2|RS17_WOLSU	WOLSU	2	30S ribosomal protein S17 OS=Wolinella succinogenes (strain ATCC 29543 / DSM 1740 / LMG 7466 / NCTC 11488 / FDC 602W) OX=273121 GN=rpsQ PE=3 SV=1	1.47837	0.302134
sp|Q7MQZ9|RS18_WOLSU	WOLSU	1	30S ribosomal protein S18 OS=Wolinella succinogenes (strain ATCC 29543 / DSM 1740 / LMG 7466 / NCTC 11488 / FDC 602W) OX=273121 GN=rpsR PE=3 SV=1	0.785824	0.432338
sp|Q7MAK0|RS2_WOLSU	WOLSU	5	30S ribosomal protein S2 OS=Wolinella succinogenes (strain ATCC 29543 / DSM 1740 / LMG 7466 / NCTC 11488 / FDC 602W) OX=273121 GN=rpsB PE=3 SV=1	1.29012	0.0373462
sp|Q7M8E0|RS3_WOLSU	WOLSU	3	30S ribosomal protein S3 OS=Wolinella succinogenes (strain ATCC 29543 / DSM 1740 / LMG 7466 / NCTC 11488 / FDC 602W) OX=273121 GN=rpsC PE=3 SV=1	0.431029	0.000600071
sp|Q7M8F6|RS4_WOLSU	WOLSU	6	30S ribosomal protein S4 OS=Wolinella succinogenes (strain ATCC 29543 / DSM 1740 / LMG 7466 / NCTC 11488 / FDC 602W) OX=273121 GN=rpsD PE=3 SV=1	0.702225	0.0326844
sp|Q7M8E9|RS5_WOLSU	WOLSU	1	30S ribosomal protein S5 OS=Wolinella succinogenes (strain ATCC 29543 / DSM 1740 / LMG 7466 / NCTC 11488 / FDC 602W) OX=273121 GN=rpsE PE=3 SV=1	1.18657	0.583411
sp|Q7MQZ8|RS6_WOLSU	WOLSU	4	30S ribosomal protein S6 OS=Wolinella succinogenes (strain ATCC 29543 / DSM 1740 / LMG 7466 / NCTC 11488 / FDC 602W) OX=273121 GN=rpsF PE=3 SV=1	0.490928	0.067929
sp|Q7MA54|RS7_WOLSU	WOLSU	1	30S ribosomal protein S7 OS=Wolinella succinogenes (strain ATCC 29543 / DSM 1740 / LMG 7466 / NCTC 11488 / FDC 602W) OX=273121 GN=rpsG PE=3 SV=1	1.56166	0.21173
sp|Q7M8E6|RS8_WOLSU	WOLSU	1	30S ribosomal protein S8 OS=Wolinella succinogenes (strain ATCC 29543 / DSM 1740 / LMG 7466 / NCTC 11488 / FDC 602W) OX=273121 GN=rpsH PE=3 SV=1	1.63202	0.0497325
sp|Q7M7R1|RS9_WOLSU	WOLSU	2	30S ribosomal protein S9 OS=Wolinella succinogenes (strain ATCC 29543 / DSM 1740 / LMG 7466 / NCTC 11488 / FDC 602W) OX=273121 GN=rpsI PE=3 SV=1	0.820848	0.21534
sp|Q7M8I1|AROQ_WOLSU	WOLSU	1	3-dehydroquinate dehydratase OS=Wolinella succinogenes (strain ATCC 29543 / DSM 1740 / LMG 7466 / NCTC 11488 / FDC 602W) OX=273121 GN=aroQ PE=3 SV=1	2.36201	0.0335226
sp|Q7MAS2|FABZ_WOLSU	WOLSU	1	3-hydroxyacyl-[acyl-carrier-protein] dehydratase FabZ OS=Wolinella succinogenes (strain ATCC 29543 / DSM 1740 / LMG 7466 / NCTC 11488 / FDC 602W) OX=273121 GN=fabZ PE=3 SV=1	0.479418	0.0139688
sp|Q7M886|LEU3_WOLSU	WOLSU	1	3-isopropylmalate dehydrogenase OS=Wolinella succinogenes (strain ATCC 29543 / DSM 1740 / LMG 7466 / NCTC 11488 / FDC 602W) OX=273121 GN=leuB PE=3 SV=1	1.4869	0.142999
sp|Q7M7L6|DAPA_WOLSU	WOLSU	3	4-hydroxy-tetrahydrodipicolinate synthase OS=Wolinella succinogenes (strain ATCC 29543 / DSM 1740 / LMG 7466 / NCTC 11488 / FDC 602W) OX=273121 GN=dapA PE=3 SV=1	1.04261	0.761279
sp|Q7MA59|RL1_WOLSU	WOLSU	4	50S ribosomal protein L1 OS=Wolinella succinogenes (strain ATCC 29543 / DSM 1740 / LMG 7466 / NCTC 11488 / FDC 602W) OX=273121 GN=rplA PE=3 SV=1	0.726175	0.0723587
sp|Q7MA58|RL10_WOLSU	WOLSU	2	50S ribosomal protein L10 OS=Wolinella succinogenes (strain ATCC 29543 / DSM 1740 / LMG 7466 / NCTC 11488 / FDC 602W) OX=273121 GN=rplJ PE=3 SV=1	1.31286	0.177629
sp|P60106|RL11_WOLSU	WOLSU	2	50S ribosomal protein L11 OS=Wolinella succinogenes (strain ATCC 29543 / DSM 1740 / LMG 7466 / NCTC 11488 / FDC 602W) OX=273121 GN=rplK PE=3 SV=1	1.94842	0.00119597
sp|Q7M7R0|RL13_WOLSU	WOLSU	1	50S ribosomal protein L13 OS=Wolinella succinogenes (strain ATCC 29543 / DSM 1740 / LMG 7466 / NCTC 11488 / FDC 602W) OX=273121 GN=rplM PE=3 SV=1	0.379916	1.54788e-05
sp|Q7M8F0|RL15_WOLSU	WOLSU	1	50S ribosomal protein L15 OS=Wolinella succinogenes (strain ATCC 29543 / DSM 1740 / LMG 7466 / NCTC 11488 / FDC 602W) OX=273121 GN=rplO PE=3 SV=1	2.46337	0.0508673
sp|Q7M8E1|RL16_WOLSU	WOLSU	1	50S ribosomal protein L16 OS=Wolinella succinogenes (strain ATCC 29543 / DSM 1740 / LMG 7466 / NCTC 11488 / FDC 602W) OX=273121 GN=rplP PE=3 SV=1	0.728362	0.191133
sp|Q7M8F8|RL17_WOLSU	WOLSU	2	50S ribosomal protein L17 OS=Wolinella succinogenes (strain ATCC 29543 / DSM 1740 / LMG 7466 / NCTC 11488 / FDC 602W) OX=273121 GN=rplQ PE=3 SV=1	0.771201	0.260482
sp|Q7MA03|RL19_WOLSU	WOLSU	2	50S ribosomal protein L19 OS=Wolinella succinogenes (strain ATCC 29543 / DSM 1740 / LMG 7466 / NCTC 11488 / FDC 602W) OX=273121 GN=rplS PE=3 SV=1	1.34232	0.51756
sp|Q7M8D7|RL2_WOLSU	WOLSU	1	50S ribosomal protein L2 OS=Wolinella succinogenes (strain ATCC 29543 / DSM 1740 / LMG 7466 / NCTC 11488 / FDC 602W) OX=273121 GN=rplB PE=3 SV=1	0.620789	0.379713
sp|Q7M9L7|RL20_WOLSU	WOLSU	1	50S ribosomal protein L20 OS=Wolinella succinogenes (strain ATCC 29543 / DSM 1740 / LMG 7466 / NCTC 11488 / FDC 602W) OX=273121 GN=rplT PE=3 SV=1	0.620519	0.0852445
sp|Q7MA30|RL21_WOLSU	WOLSU	3	50S ribosomal protein L21 OS=Wolinella succinogenes (strain ATCC 29543 / DSM 1740 / LMG 7466 / NCTC 11488 / FDC 602W) OX=273121 GN=rplU PE=3 SV=1	0.866879	0.344937
sp|Q7M8D6|RL23_WOLSU	WOLSU	1	50S ribosomal protein L23 OS=Wolinella succinogenes (strain ATCC 29543 / DSM 1740 / LMG 7466 / NCTC 11488 / FDC 602W) OX=273121 GN=rplW PE=3 SV=1	0.397444	0.0615609
sp|Q7M8E4|RL24_WOLSU	WOLSU	2	50S ribosomal protein L24 OS=Wolinella succinogenes (strain ATCC 29543 / DSM 1740 / LMG 7466 / NCTC 11488 / FDC 602W) OX=273121 GN=rplX PE=3 SV=2	0.753337	0.120669
sp|Q7M7U7|RL25_WOLSU	WOLSU	5	50S ribosomal protein L25 OS=Wolinella succinogenes (strain ATCC 29543 / DSM 1740 / LMG 7466 / NCTC 11488 / FDC 602W) OX=273121 GN=rplY PE=3 SV=1	1.11109	0.0912646
sp|Q7M8D4|RL3_WOLSU	WOLSU	1	50S ribosomal protein L3 OS=Wolinella succinogenes (strain ATCC 29543 / DSM 1740 / LMG 7466 / NCTC 11488 / FDC 602W) OX=273121 GN=rplC PE=3 SV=1	0.337144	0.00882981
sp|Q7M8D5|RL4_WOLSU	WOLSU	1	50S ribosomal protein L4 OS=Wolinella succinogenes (strain ATCC 29543 / DSM 1740 / LMG 7466 / NCTC 11488 / FDC 602W) OX=273121 GN=rplD PE=3 SV=1	0.812233	0.455454
sp|Q7M8E5|RL5_WOLSU	WOLSU	2	50S ribosomal protein L5 OS=Wolinella succinogenes (strain ATCC 29543 / DSM 1740 / LMG 7466 / NCTC 11488 / FDC 602W) OX=273121 GN=rplE PE=3 SV=1	1.51043	0.0131237
sp|Q7M8E7|RL6_WOLSU	WOLSU	3	50S ribosomal protein L6 OS=Wolinella succinogenes (strain ATCC 29543 / DSM 1740 / LMG 7466 / NCTC 11488 / FDC 602W) OX=273121 GN=rplF PE=3 SV=1	0.928566	0.567868
sp|Q7MA57|RL7_WOLSU	WOLSU	2	50S ribosomal protein L7/L12 OS=Wolinella succinogenes (strain ATCC 29543 / DSM 1740 / LMG 7466 / NCTC 11488 / FDC 602W) OX=273121 GN=rplL PE=3 SV=1	0.835761	0.490379
sp|Q7M8Z5|RL9_WOLSU	WOLSU	2	50S ribosomal protein L9 OS=Wolinella succinogenes (strain ATCC 29543 / DSM 1740 / LMG 7466 / NCTC 11488 / FDC 602W) OX=273121 GN=rplI PE=3 SV=1	2.57397	2.57403e-05
tr|Q7M8B0|Q7M8B0_WOLSU	WOLSU	3	50S ribosomal subunit assembly factor BipA OS=Wolinella succinogenes (strain ATCC 29543 / DSM 1740 / LMG 7466 / NCTC 11488 / FDC 602W) OX=273121 GN=TYPA PE=3 SV=1	1.06167	0.840659
tr|Q7MAG5|Q7MAG5_WOLSU	WOLSU	5	5-methyltetrahydropteroyltriglutamate--homocysteine methyltransferase OS=Wolinella succinogenes (strain ATCC 29543 / DSM 1740 / LMG 7466 / NCTC 11488 / FDC 602W) OX=273121 GN=metE PE=3 SV=1	1.67445	0.0022708
sp|Q7MAF0|RISB_WOLSU	WOLSU	2	6,7-dimethyl-8-ribityllumazine synthase OS=Wolinella succinogenes (strain ATCC 29543 / DSM 1740 / LMG 7466 / NCTC 11488 / FDC 602W) OX=273121 GN=ribH PE=3 SV=1	1.12398	0.463776
sp|Q7MAE3|CH60_WOLSU	WOLSU	12	60 kDa chaperonin OS=Wolinella succinogenes (strain ATCC 29543 / DSM 1740 / LMG 7466 / NCTC 11488 / FDC 602W) OX=273121 GN=groL PE=3 SV=1	1.07288	0.497593
sp|Q7M825|MFRE_WOLSU	WOLSU	1	8-methylmenaquinol:fumarate reductase membrane anchor subunit OS=Wolinella succinogenes (strain ATCC 29543 / DSM 1740 / LMG 7466 / NCTC 11488 / FDC 602W) OX=273121 GN=sdhE PE=1 SV=1	3.42343	0.0202219
tr|Q7M8R4|Q7M8R4_WOLSU	WOLSU	5	ABC TRANSPORT SYSTEM PERIPLASMIC BINDING PROTEIN OS=Wolinella succinogenes (strain ATCC 29543 / DSM 1740 / LMG 7466 / NCTC 11488 / FDC 602W) OX=273121 GN=LIVK PE=4 SV=1	1.61123	0.00962487
sp|Q7M7Q9|ARGB_WOLSU	WOLSU	1	Acetylglutamate kinase OS=Wolinella succinogenes (strain ATCC 29543 / DSM 1740 / LMG 7466 / NCTC 11488 / FDC 602W) OX=273121 GN=argB PE=3 SV=1	1.14031	0.704267
sp|Q7M9W1|ACP_WOLSU	WOLSU	1	Acyl carrier protein OS=Wolinella succinogenes (strain ATCC 29543 / DSM 1740 / LMG 7466 / NCTC 11488 / FDC 602W) OX=273121 GN=acpP PE=3 SV=1	0.381031	0.0144109
sp|Q7M8A5|KAD_WOLSU	WOLSU	6	Adenylate kinase OS=Wolinella succinogenes (strain ATCC 29543 / DSM 1740 / LMG 7466 / NCTC 11488 / FDC 602W) OX=273121 GN=adk PE=3 SV=1	1.09654	0.697416
tr|Q7MA83|Q7MA83_WOLSU	WOLSU	2	Adenylosuccinate lyase OS=Wolinella succinogenes (strain ATCC 29543 / DSM 1740 / LMG 7466 / NCTC 11488 / FDC 602W) OX=273121 GN=PURB PE=3 SV=1	1.32329	0.192576
sp|Q7M7V8|PURA_WOLSU	WOLSU	1	Adenylosuccinate synthetase OS=Wolinella succinogenes (strain ATCC 29543 / DSM 1740 / LMG 7466 / NCTC 11488 / FDC 602W) OX=273121 GN=purA PE=3 SV=1	0.440701	0.00190201
tr|Q7M866|Q7M866_WOLSU	WOLSU	5	ALDEHYDE FERREDOXIN OXIDOREDUCTASE OS=Wolinella succinogenes (strain ATCC 29543 / DSM 1740 / LMG 7466 / NCTC 11488 / FDC 602W) OX=273121 GN=WS1844 PE=3 SV=1	1.25203	0.112078
tr|Q7MA94|Q7MA94_WOLSU	WOLSU	2	ALDEHYDE OXIDOREDUCTASE OS=Wolinella succinogenes (strain ATCC 29543 / DSM 1740 / LMG 7466 / NCTC 11488 / FDC 602W) OX=273121 GN=glnH PE=3 SV=1	2.60153	0.000136643
tr|Q7M8C0|Q7M8C0_WOLSU	WOLSU	1	Alkyl hydroperoxide reductase C OS=Wolinella succinogenes (strain ATCC 29543 / DSM 1740 / LMG 7466 / NCTC 11488 / FDC 602W) OX=273121 GN=AHPC1 PE=3 SV=1	9.338	0.00265658
tr|Q7MAE1|Q7MAE1_WOLSU	WOLSU	1	Aminotransferase OS=Wolinella succinogenes (strain ATCC 29543 / DSM 1740 / LMG 7466 / NCTC 11488 / FDC 602W) OX=273121 GN=ASPB PE=3 SV=1	2.04233	0.00757552
sp|Q7MAC9|ARGJ_WOLSU	WOLSU	1	Arginine biosynthesis bifunctional protein ArgJ OS=Wolinella succinogenes (strain ATCC 29543 / DSM 1740 / LMG 7466 / NCTC 11488 / FDC 602W) OX=273121 GN=argJ PE=3 SV=1	0.438132	0.0515858
sp|Q7M7P6|ASSY_WOLSU	WOLSU	4	Argininosuccinate synthase OS=Wolinella succinogenes (strain ATCC 29543 / DSM 1740 / LMG 7466 / NCTC 11488 / FDC 602W) OX=273121 GN=argG PE=3 SV=1	1.09671	0.419514
tr|Q7MAU2|Q7MAU2_WOLSU	WOLSU	1	ASPARTATE AMINOTRANSFERASE OS=Wolinella succinogenes (strain ATCC 29543 / DSM 1740 / LMG 7466 / NCTC 11488 / FDC 602W) OX=273121 GN=WS0024 PE=3 SV=1	0.386047	5.9682e-05
tr|Q7M9U5|Q7M9U5_WOLSU	WOLSU	2	Aspartate ammonia-lyase OS=Wolinella succinogenes (strain ATCC 29543 / DSM 1740 / LMG 7466 / NCTC 11488 / FDC 602W) OX=273121 GN=ASPA PE=3 SV=1	1.96124	0.00696397
tr|Q7MAA7|Q7MAA7_WOLSU	WOLSU	3	Aspartate-semialdehyde dehydrogenase OS=Wolinella succinogenes (strain ATCC 29543 / DSM 1740 / LMG 7466 / NCTC 11488 / FDC 602W) OX=273121 GN=asd PE=3 SV=1	1.79374	0.00395656
sp|Q7M8A6|SYDND_WOLSU	WOLSU	2	Aspartate--tRNA(Asp/Asn) ligase OS=Wolinella succinogenes (strain ATCC 29543 / DSM 1740 / LMG 7466 / NCTC 11488 / FDC 602W) OX=273121 GN=aspS PE=3 SV=1	1.06343	0.810042
tr|Q7M8C7|Q7M8C7_WOLSU	WOLSU	2	Aspartokinase OS=Wolinella succinogenes (strain ATCC 29543 / DSM 1740 / LMG 7466 / NCTC 11488 / FDC 602W) OX=273121 GN=LYSC PE=3 SV=1	2.09074	0.000952637
sp|Q7MSF4|ATPE_WOLSU	WOLSU	1	ATP synthase epsilon chain OS=Wolinella succinogenes (strain ATCC 29543 / DSM 1740 / LMG 7466 / NCTC 11488 / FDC 602W) OX=273121 GN=atpC PE=3 SV=1	0.787675	0.432821
sp|Q7MA19|ATPG_WOLSU	WOLSU	5	ATP synthase gamma chain OS=Wolinella succinogenes (strain ATCC 29543 / DSM 1740 / LMG 7466 / NCTC 11488 / FDC 602W) OX=273121 GN=atpG PE=3 SV=1	1.24663	0.105394
sp|Q7MA20|ATPA_WOLSU	WOLSU	11	ATP synthase subunit alpha OS=Wolinella succinogenes (strain ATCC 29543 / DSM 1740 / LMG 7466 / NCTC 11488 / FDC 602W) OX=273121 GN=atpA PE=3 SV=1	0.8831	0.259076
sp|P42470|ATPB_WOLSU	WOLSU	13	ATP synthase subunit beta OS=Wolinella succinogenes (strain ATCC 29543 / DSM 1740 / LMG 7466 / NCTC 11488 / FDC 602W) OX=273121 GN=atpD PE=3 SV=1	0.82015	0.177516
sp|Q7MA21|ATPD_WOLSU	WOLSU	1	ATP synthase subunit delta OS=Wolinella succinogenes (strain ATCC 29543 / DSM 1740 / LMG 7466 / NCTC 11488 / FDC 602W) OX=273121 GN=atpH PE=3 SV=1	1.57504	0.179992
tr|Q7M8Q7|Q7M8Q7_WOLSU	WOLSU	5	ATP-DEPENDENT RNA HELICASE, DEAD-BOX FAMILY DEAD OS=Wolinella succinogenes (strain ATCC 29543 / DSM 1740 / LMG 7466 / NCTC 11488 / FDC 602W) OX=273121 GN=WS1482 PE=4 SV=1	1.55268	0.00116523
tr|Q7M9W6|Q7M9W6_WOLSU	WOLSU	1	ATP-dependent zinc metalloprotease FtsH OS=Wolinella succinogenes (strain ATCC 29543 / DSM 1740 / LMG 7466 / NCTC 11488 / FDC 602W) OX=273121 GN=FTSH PE=3 SV=1	1.9061	0.0472196
tr|Q7MAV2|Q7MAV2_WOLSU	WOLSU	2	Beta sliding clamp OS=Wolinella succinogenes (strain ATCC 29543 / DSM 1740 / LMG 7466 / NCTC 11488 / FDC 602W) OX=273121 GN=DNAN PE=3 SV=1	1.75326	0.00810091
sp|Q7MA56|RPOBC_WOLSU	WOLSU	13	Bifunctional DNA-directed RNA polymerase subunit beta-beta' OS=Wolinella succinogenes (strain ATCC 29543 / DSM 1740 / LMG 7466 / NCTC 11488 / FDC 602W) OX=273121 GN=rpoBC PE=3 SV=1	1.16252	0.0554206
tr|Q7MAG0|Q7MAG0_WOLSU	WOLSU	1	BINDING COMPONENT OF ABC TRANSPORTER OS=Wolinella succinogenes (strain ATCC 29543 / DSM 1740 / LMG 7466 / NCTC 11488 / FDC 602W) OX=273121 GN=WS0279 PE=1 SV=1	1.48428	0.297677
tr|Q7MAG1|Q7MAG1_WOLSU	WOLSU	1	BINDING PROTEIN COMPONENT ABC TRANSPORTER OS=Wolinella succinogenes (strain ATCC 29543 / DSM 1740 / LMG 7466 / NCTC 11488 / FDC 602W) OX=273121 GN=WS0278 PE=3 SV=1	0.852671	0.707974
tr|Q7M999|Q7M999_WOLSU	WOLSU	2	Biotin carboxyl carrier protein of acetyl-CoA carboxylase OS=Wolinella succinogenes (strain ATCC 29543 / DSM 1740 / LMG 7466 / NCTC 11488 / FDC 602W) OX=273121 GN=ACCB PE=4 SV=1	0.358053	0.0589678
tr|Q7M998|Q7M998_WOLSU	WOLSU	1	Biotin carboxylase OS=Wolinella succinogenes (strain ATCC 29543 / DSM 1740 / LMG 7466 / NCTC 11488 / FDC 602W) OX=273121 GN=WS1074 PE=4 SV=1	1.57786	0.1344
tr|Q7MAQ7|Q7MAQ7_WOLSU	WOLSU	2	Branched-chain-amino-acid aminotransferase OS=Wolinella succinogenes (strain ATCC 29543 / DSM 1740 / LMG 7466 / NCTC 11488 / FDC 602W) OX=273121 GN=ILVE PE=3 SV=1	0.722966	0.199186
tr|Q7MSR2|Q7MSR2_WOLSU	WOLSU	3	CADF OS=Wolinella succinogenes (strain ATCC 29543 / DSM 1740 / LMG 7466 / NCTC 11488 / FDC 602W) OX=273121 GN=CADF PE=4 SV=1	0.854197	0.473751
tr|Q7M7Q7|Q7M7Q7_WOLSU	WOLSU	1	Carbamoyl-phosphate synthase large chain OS=Wolinella succinogenes (strain ATCC 29543 / DSM 1740 / LMG 7466 / NCTC 11488 / FDC 602W) OX=273121 GN=CARB PE=3 SV=1	1.97282	0.0971405
tr|Q7MAK7|Q7MAK7_WOLSU	WOLSU	3	Cbb3-type cytochrome c oxidase subunit OS=Wolinella succinogenes (strain ATCC 29543 / DSM 1740 / LMG 7466 / NCTC 11488 / FDC 602W) OX=273121 GN=CCOP PE=3 SV=1	1.27407	0.279228
tr|Q7MAK8|Q7MAK8_WOLSU	WOLSU	4	CB-TYPE CYTOCHROME C OXIDASE SUBUNIT II OS=Wolinella succinogenes (strain ATCC 29543 / DSM 1740 / LMG 7466 / NCTC 11488 / FDC 602W) OX=273121 GN=CCOO PE=4 SV=1	1.63523	0.0160601
tr|Q7M902|Q7M902_WOLSU	WOLSU	4	CELL BINDING FACTOR 2 MAJOR ANTIGEN PEB4A OS=Wolinella succinogenes (strain ATCC 29543 / DSM 1740 / LMG 7466 / NCTC 11488 / FDC 602W) OX=273121 GN=WS1281 PE=4 SV=1	0.561449	0.000846032
tr|Q7MAS5|Q7MAS5_WOLSU	WOLSU	1	Cell shape-determining protein MreB OS=Wolinella succinogenes (strain ATCC 29543 / DSM 1740 / LMG 7466 / NCTC 11488 / FDC 602W) OX=273121 GN=MREB PE=3 SV=1	0.842082	0.540395
sp|Q7M9X4|CLPB_WOLSU	WOLSU	5	Chaperone protein ClpB OS=Wolinella succinogenes (strain ATCC 29543 / DSM 1740 / LMG 7466 / NCTC 11488 / FDC 602W) OX=273121 GN=clpB PE=3 SV=1	1.33025	0.107878
sp|Q7MA35|DNAK_WOLSU	WOLSU	15	Chaperone protein DnaK OS=Wolinella succinogenes (strain ATCC 29543 / DSM 1740 / LMG 7466 / NCTC 11488 / FDC 602W) OX=273121 GN=dnaK PE=3 SV=1	0.961139	0.800032
tr|Q7M7U2|Q7M7U2_WOLSU	WOLSU	2	CHEMOTAXIS PROTEIN EC 2.7.3 OS=Wolinella succinogenes (strain ATCC 29543 / DSM 1740 / LMG 7466 / NCTC 11488 / FDC 602W) OX=273121 GN=CHEV PE=4 SV=1	1.58518	0.138439
tr|Q7M8S3|Q7M8S3_WOLSU	WOLSU	2	Citrate synthase OS=Wolinella succinogenes (strain ATCC 29543 / DSM 1740 / LMG 7466 / NCTC 11488 / FDC 602W) OX=273121 GN=GLTA PE=3 SV=1	1.36462	0.145271
tr|Q7MRU7|Q7MRU7_WOLSU	WOLSU	2	CoA_binding domain-containing protein OS=Wolinella succinogenes (strain ATCC 29543 / DSM 1740 / LMG 7466 / NCTC 11488 / FDC 602W) OX=273121 GN=WS1029 PE=4 SV=1	1.41208	0.00099459
tr|Q7M7M6|Q7M7M6_WOLSU	WOLSU	1	Cysteine desulfurase OS=Wolinella succinogenes (strain ATCC 29543 / DSM 1740 / LMG 7466 / NCTC 11488 / FDC 602W) OX=273121 GN=WS2206 PE=3 SV=1	3.15355	0.00263951
tr|Q7M958|Q7M958_WOLSU	WOLSU	4	Cysteine synthase OS=Wolinella succinogenes (strain ATCC 29543 / DSM 1740 / LMG 7466 / NCTC 11488 / FDC 602W) OX=273121 GN=WS1188 PE=3 SV=1	1.80464	0.000253114
sp|Q9S1E5|NRFA_WOLSU	WOLSU	2	Cytochrome c-552 OS=Wolinella succinogenes (strain ATCC 29543 / DSM 1740 / LMG 7466 / NCTC 11488 / FDC 602W) OX=273121 GN=nrfA PE=1 SV=2	0.684089	0.366076
tr|Q7M8Y4|Q7M8Y4_WOLSU	WOLSU	3	D-3-phosphoglycerate dehydrogenase OS=Wolinella succinogenes (strain ATCC 29543 / DSM 1740 / LMG 7466 / NCTC 11488 / FDC 602W) OX=273121 GN=SERA PE=3 SV=1	1.13773	0.165408
tr|Q7M7L8|Q7M7L8_WOLSU	WOLSU	1	DHOdehase OS=Wolinella succinogenes (strain ATCC 29543 / DSM 1740 / LMG 7466 / NCTC 11488 / FDC 602W) OX=273121 GN=PYRD PE=3 SV=1	4.50956	0.0012698
sp|Q7MAN4|ILVD_WOLSU	WOLSU	1	Dihydroxy-acid dehydratase OS=Wolinella succinogenes (strain ATCC 29543 / DSM 1740 / LMG 7466 / NCTC 11488 / FDC 602W) OX=273121 GN=ilvD PE=3 SV=1	0.861411	0.538212
tr|Q7MRF8|Q7MRF8_WOLSU	WOLSU	1	Dinitrogenase OS=Wolinella succinogenes (strain ATCC 29543 / DSM 1740 / LMG 7466 / NCTC 11488 / FDC 602W) OX=273121 GN=NIFD PE=3 SV=1	1.50495	0.128654
tr|Q7MAA9|Q7MAA9_WOLSU	WOLSU	1	DNA gyrase subunit A OS=Wolinella succinogenes (strain ATCC 29543 / DSM 1740 / LMG 7466 / NCTC 11488 / FDC 602W) OX=273121 GN=gyrA PE=3 SV=1	0.632353	0.31479
tr|Q7MAV1|Q7MAV1_WOLSU	WOLSU	1	DNA gyrase subunit B OS=Wolinella succinogenes (strain ATCC 29543 / DSM 1740 / LMG 7466 / NCTC 11488 / FDC 602W) OX=273121 GN=gyrB PE=3 SV=1	0.421547	0.00780478
sp|Q7M8F7|RPOA_WOLSU	WOLSU	7	DNA-directed RNA polymerase subunit alpha OS=Wolinella succinogenes (strain ATCC 29543 / DSM 1740 / LMG 7466 / NCTC 11488 / FDC 602W) OX=273121 GN=rpoA PE=3 SV=1	0.865825	0.226309
sp|Q7MA53|EFG_WOLSU	WOLSU	16	Elongation factor G OS=Wolinella succinogenes (strain ATCC 29543 / DSM 1740 / LMG 7466 / NCTC 11488 / FDC 602W) OX=273121 GN=fusA PE=3 SV=1	0.623851	0.000626876
sp|Q7M904|EFP_WOLSU	WOLSU	3	Elongation factor P OS=Wolinella succinogenes (strain ATCC 29543 / DSM 1740 / LMG 7466 / NCTC 11488 / FDC 602W) OX=273121 GN=efp PE=3 SV=1	1.14121	0.448628
sp|Q7MAK1|EFTS_WOLSU	WOLSU	3	Elongation factor Ts OS=Wolinella succinogenes (strain ATCC 29543 / DSM 1740 / LMG 7466 / NCTC 11488 / FDC 602W) OX=273121 GN=tsf PE=3 SV=1	0.381331	7.56985e-06
sp|P42482|EFTU_WOLSU	WOLSU	17	Elongation factor Tu OS=Wolinella succinogenes (strain ATCC 29543 / DSM 1740 / LMG 7466 / NCTC 11488 / FDC 602W) OX=273121 GN=tuf PE=3 SV=2	0.91837	0.487279
sp|Q7M8Q0|ENO_WOLSU	WOLSU	2	Enolase OS=Wolinella succinogenes (strain ATCC 29543 / DSM 1740 / LMG 7466 / NCTC 11488 / FDC 602W) OX=273121 GN=eno PE=3 SV=1	1.16874	0.430766
tr|Q7MAA4|Q7MAA4_WOLSU	WOLSU	2	EXTRACELLULAR SOLUTE-BINDING PROTEIN, PUTATIVE OS=Wolinella succinogenes (strain ATCC 29543 / DSM 1740 / LMG 7466 / NCTC 11488 / FDC 602W) OX=273121 GN=WS0373 PE=3 SV=1	1.24007	0.243804
sp|Q7MR59|FLIW1_WOLSU	WOLSU	1	Flagellar assembly factor FliW 1 OS=Wolinella succinogenes (strain ATCC 29543 / DSM 1740 / LMG 7466 / NCTC 11488 / FDC 602W) OX=273121 GN=fliW1 PE=3 SV=1	1.57394	0.0597034
tr|Q7M8B3|Q7M8B3_WOLSU	WOLSU	1	Flagellar hook protein FlgE OS=Wolinella succinogenes (strain ATCC 29543 / DSM 1740 / LMG 7466 / NCTC 11488 / FDC 602W) OX=273121 GN=FLGE PE=3 SV=1	0.851878	0.355179
tr|Q7M7N1|Q7M7N1_WOLSU	WOLSU	1	Flagellin OS=Wolinella succinogenes (strain ATCC 29543 / DSM 1740 / LMG 7466 / NCTC 11488 / FDC 602W) OX=273121 GN=FLAB PE=3 SV=1	1.28099	0.243113
tr|Q79HP6|Q79HP6_WOLSU	WOLSU	22	Flagellin OS=Wolinella succinogenes (strain ATCC 29543 / DSM 1740 / LMG 7466 / NCTC 11488 / FDC 602W) OX=273121 GN=FLAG PE=3 SV=1	0.65723	0.0522368
tr|Q7MAP0|Q7MAP0_WOLSU	WOLSU	13	FLAVOCYTOCHROME C FLAVIN SUBUNIT OS=Wolinella succinogenes (strain ATCC 29543 / DSM 1740 / LMG 7466 / NCTC 11488 / FDC 602W) OX=273121 GN=FCCA PE=3 SV=1	3.37657	0.000348094
sp|P27273|FDHB_WOLSU	WOLSU	4	Formate dehydrogenase iron-sulfur subunit OS=Wolinella succinogenes (strain ATCC 29543 / DSM 1740 / LMG 7466 / NCTC 11488 / FDC 602W) OX=273121 GN=fdhB1 PE=1 SV=1	0.311361	6.55546e-05
tr|Q7M7L0|Q7M7L0_WOLSU	WOLSU	16	FORMATE DEHYDROGENASE OS=Wolinella succinogenes (strain ATCC 29543 / DSM 1740 / LMG 7466 / NCTC 11488 / FDC 602W) OX=273121 GN=FDHA PE=4 SV=2	0.679694	0.00173471
sp|Q7M8I0|PURT_WOLSU	WOLSU	1	Formate-dependent phosphoribosylglycinamide formyltransferase OS=Wolinella succinogenes (strain ATCC 29543 / DSM 1740 / LMG 7466 / NCTC 11488 / FDC 602W) OX=273121 GN=purT PE=3 SV=1	0.405696	0.0049656
tr|Q7M903|Q7M903_WOLSU	WOLSU	4	FRUCTOSE-BISPHOSPHATE ALDOLASE OS=Wolinella succinogenes (strain ATCC 29543 / DSM 1740 / LMG 7466 / NCTC 11488 / FDC 602W) OX=273121 GN=WS1280 PE=4 SV=1	0.921643	0.782393
tr|Q7M823|Q7M823_WOLSU	WOLSU	2	Glutamate dehydrogenase OS=Wolinella succinogenes (strain ATCC 29543 / DSM 1740 / LMG 7466 / NCTC 11488 / FDC 602W) OX=273121 GN=gdhA PE=3 SV=1	0.813702	0.344939
tr|Q7M7R9|Q7M7R9_WOLSU	WOLSU	8	GLUTAMINE SYNTHETASE OS=Wolinella succinogenes (strain ATCC 29543 / DSM 1740 / LMG 7466 / NCTC 11488 / FDC 602W) OX=273121 GN=GLNA PE=3 SV=1	0.901761	0.48066
tr|Q7M9C4|Q7M9C4_WOLSU	WOLSU	1	Glyceraldehyde-3-phosphate dehydrogenase OS=Wolinella succinogenes (strain ATCC 29543 / DSM 1740 / LMG 7466 / NCTC 11488 / FDC 602W) OX=273121 GN=GAP_2 PE=3 SV=1	0.802094	0.148089
tr|Q7M7U3|Q7M7U3_WOLSU	WOLSU	3	Histidine kinase OS=Wolinella succinogenes (strain ATCC 29543 / DSM 1740 / LMG 7466 / NCTC 11488 / FDC 602W) OX=273121 GN=CHEA PE=4 SV=1	0.809689	0.221887
tr|Q7MR24|Q7MR24_WOLSU	WOLSU	2	HP0268 domain-containing protein OS=Wolinella succinogenes (strain ATCC 29543 / DSM 1740 / LMG 7466 / NCTC 11488 / FDC 602W) OX=273121 GN=WS1777 PE=4 SV=1	1.64599	0.0588089
tr|Q7M9Q9|Q7M9Q9_WOLSU	WOLSU	2	IMMUNOGENIC PROTEIN OS=Wolinella succinogenes (strain ATCC 29543 / DSM 1740 / LMG 7466 / NCTC 11488 / FDC 602W) OX=273121 GN=WS0748 PE=4 SV=1	0.652463	0.291398
tr|Q7M9S3|Q7M9S3_WOLSU	WOLSU	3	Indolepyruvate oxidoreductase subunit IorA OS=Wolinella succinogenes (strain ATCC 29543 / DSM 1740 / LMG 7466 / NCTC 11488 / FDC 602W) OX=273121 GN=WS0714 PE=4 SV=1	1.16336	0.122321
tr|Q7M8A3|Q7M8A3_WOLSU	WOLSU	2	Inorganic pyrophosphatase OS=Wolinella succinogenes (strain ATCC 29543 / DSM 1740 / LMG 7466 / NCTC 11488 / FDC 602W) OX=273121 GN=PPA PE=3 SV=1	0.33171	0.298701
tr|Q7M843|Q7M843_WOLSU	WOLSU	5	Inosine-5'-monophosphate dehydrogenase OS=Wolinella succinogenes (strain ATCC 29543 / DSM 1740 / LMG 7466 / NCTC 11488 / FDC 602W) OX=273121 GN=GUAB PE=3 SV=1	0.919918	0.618519
tr|Q7M817|Q7M817_WOLSU	WOLSU	2	Iron-sulfur cluster carrier protein OS=Wolinella succinogenes (strain ATCC 29543 / DSM 1740 / LMG 7466 / NCTC 11488 / FDC 602W) OX=273121 GN=MRP PE=3 SV=1	0.456894	0.0174462
tr|Q7M8S2|Q7M8S2_WOLSU	WOLSU	1	Isocitrate dehydrogenase [NADP] OS=Wolinella succinogenes (strain ATCC 29543 / DSM 1740 / LMG 7466 / NCTC 11488 / FDC 602W) OX=273121 GN=WS1454 PE=4 SV=1	1.37636	0.323643
sp|Q7M851|ILVC_WOLSU	WOLSU	5	Ketol-acid reductoisomerase (NADP(+)) OS=Wolinella succinogenes (strain ATCC 29543 / DSM 1740 / LMG 7466 / NCTC 11488 / FDC 602W) OX=273121 GN=ilvC PE=3 SV=1	0.774433	0.00980129
tr|Q7MSU0|Q7MSU0_WOLSU	WOLSU	5	Lar_N domain-containing protein OS=Wolinella succinogenes (strain ATCC 29543 / DSM 1740 / LMG 7466 / NCTC 11488 / FDC 602W) OX=273121 GN=WS0140 PE=4 SV=1	1.20295	0.390272
sp|P50286|ASPG_WOLSU	WOLSU	5	L-asparaginase OS=Wolinella succinogenes (strain ATCC 29543 / DSM 1740 / LMG 7466 / NCTC 11488 / FDC 602W) OX=273121 GN=ansA PE=1 SV=2	0.443841	0.000131939
tr|Q7MSM9|Q7MSM9_WOLSU	WOLSU	11	LINOCIN M18 OS=Wolinella succinogenes (strain ATCC 29543 / DSM 1740 / LMG 7466 / NCTC 11488 / FDC 602W) OX=273121 GN=WS0287 PE=4 SV=1	0.666016	0.0317609
tr|Q7M8N4|Q7M8N4_WOLSU	WOLSU	11	L-TARTRATE DEHYDRATASE, SUBUNIT A OS=Wolinella succinogenes (strain ATCC 29543 / DSM 1740 / LMG 7466 / NCTC 11488 / FDC 602W) OX=273121 GN=WS1530 PE=3 SV=1	0.648348	0.00036733
tr|Q7M8N5|Q7M8N5_WOLSU	WOLSU	6	L-TARTRATE DEHYDRATASE, SUBUNIT B OS=Wolinella succinogenes (strain ATCC 29543 / DSM 1740 / LMG 7466 / NCTC 11488 / FDC 602W) OX=273121 GN=accA PE=3 SV=1	0.413244	0.131871
tr|Q7MAJ0|Q7MAJ0_WOLSU	WOLSU	1	Methionine--tRNA ligase OS=Wolinella succinogenes (strain ATCC 29543 / DSM 1740 / LMG 7466 / NCTC 11488 / FDC 602W) OX=273121 GN=METS PE=3 SV=1	2.79173	0.00827241
tr|Q7M9G6|Q7M9G6_WOLSU	WOLSU	3	METHYL-ACC. CHEMOTAXIS SIGNAL TRANSDUCTION OS=Wolinella succinogenes (strain ATCC 29543 / DSM 1740 / LMG 7466 / NCTC 11488 / FDC 602W) OX=273121 GN=WS0939 PE=4 SV=1	2.58567	0.0264975
tr|Q7MAQ5|Q7MAQ5_WOLSU	WOLSU	2	METHYL-ACCEPTING CHEMOTAXIS PROTEIN II OS=Wolinella succinogenes (strain ATCC 29543 / DSM 1740 / LMG 7466 / NCTC 11488 / FDC 602W) OX=273121 GN=WS0094 PE=4 SV=1	2.47252	0.0093364
tr|Q7M951|Q7M951_WOLSU	WOLSU	1	MOLYBDENUM COFACTOR BIOSYNTHESIS MOG OS=Wolinella succinogenes (strain ATCC 29543 / DSM 1740 / LMG 7466 / NCTC 11488 / FDC 602W) OX=273121 GN=MOG PE=4 SV=1	0.54038	0.143223
tr|Q7M9S7|Q7M9S7_WOLSU	WOLSU	6	MOLYBDOPTERIN OXIDOREDUCTASE, IRON-SULFUR BINDING SUBUNIT OS=Wolinella succinogenes (strain ATCC 29543 / DSM 1740 / LMG 7466 / NCTC 11488 / FDC 602W) OX=273121 GN=WS0708 PE=4 SV=1	0.376	0.000249404
tr|Q7M7S1|Q7M7S1_WOLSU	WOLSU	2	N5-carboxyaminoimidazole ribonucleotide mutase OS=Wolinella succinogenes (strain ATCC 29543 / DSM 1740 / LMG 7466 / NCTC 11488 / FDC 602W) OX=273121 GN=PURE PE=3 SV=1	1.66924	0.0701328
tr|Q7M8K8|Q7M8K8_WOLSU	WOLSU	1	NEUTROPHIL-ACTIVATING PROTEIN (NEUTROPHIL ACTIVATING PROTEIN NAPA)(FRAGMENT) OS=Wolinella succinogenes (strain ATCC 29543 / DSM 1740 / LMG 7466 / NCTC 11488 / FDC 602W) OX=273121 GN=NAPA PE=3 SV=1	0.253252	0.000755921
tr|Q7MR04|Q7MR04_WOLSU	WOLSU	4	Nitro_FeMo-Co domain-containing protein OS=Wolinella succinogenes (strain ATCC 29543 / DSM 1740 / LMG 7466 / NCTC 11488 / FDC 602W) OX=273121 GN=WS1855 PE=4 SV=1	0.419528	3.96041e-06
sp|Q7M8U8|NIFH_WOLSU	WOLSU	1	Nitrogenase iron protein OS=Wolinella succinogenes (strain ATCC 29543 / DSM 1740 / LMG 7466 / NCTC 11488 / FDC 602W) OX=273121 GN=nifH PE=3 SV=1	1.68414	0.0218697
tr|Q7M8U9|Q7M8U9_WOLSU	WOLSU	1	Nitrogenase molybdenum-iron protein beta chain OS=Wolinella succinogenes (strain ATCC 29543 / DSM 1740 / LMG 7466 / NCTC 11488 / FDC 602W) OX=273121 GN=NIFK PE=3 SV=1	0.983383	0.956957
tr|Q7M8V6|Q7M8V6_WOLSU	WOLSU	2	NON-HAEM IRON PROTEIN OS=Wolinella succinogenes (strain ATCC 29543 / DSM 1740 / LMG 7466 / NCTC 11488 / FDC 602W) OX=273121 GN=WS1374 PE=4 SV=1	0.939403	0.684769
sp|Q7M7Z3|NDK_WOLSU	WOLSU	1	Nucleoside diphosphate kinase OS=Wolinella succinogenes (strain ATCC 29543 / DSM 1740 / LMG 7466 / NCTC 11488 / FDC 602W) OX=273121 GN=ndk PE=3 SV=1	0.691769	0.119265
tr|Q7M9C6|Q7M9C6_WOLSU	WOLSU	1	O-ACETYLHOMOSERINE SULFHYDRYLASE OS=Wolinella succinogenes (strain ATCC 29543 / DSM 1740 / LMG 7466 / NCTC 11488 / FDC 602W) OX=273121 GN=WS1015 PE=3 SV=1	2.15106	0.170248
tr|Q7MRQ7|Q7MRQ7_WOLSU	WOLSU	1	ORF2 OS=Wolinella succinogenes (strain ATCC 29543 / DSM 1740 / LMG 7466 / NCTC 11488 / FDC 602W) OX=273121 GN=WS1127 PE=4 SV=1	1.7564	0.0702148
tr|Q7M9R3|Q7M9R3_WOLSU	WOLSU	15	ORF7 PROTEIN OS=Wolinella succinogenes (strain ATCC 29543 / DSM 1740 / LMG 7466 / NCTC 11488 / FDC 602W) OX=273121 GN=WS0739 PE=3 SV=1	0.435109	0.00328333
tr|Q7MAB6|Q7MAB6_WOLSU	WOLSU	2	Outer membrane protein assembly factor BamA OS=Wolinella succinogenes (strain ATCC 29543 / DSM 1740 / LMG 7466 / NCTC 11488 / FDC 602W) OX=273121 GN=bamA PE=3 SV=1	1.39712	0.169281
tr|Q7MSF2|Q7MSF2_WOLSU	WOLSU	6	Peptidoglycan-associated protein OS=Wolinella succinogenes (strain ATCC 29543 / DSM 1740 / LMG 7466 / NCTC 11488 / FDC 602W) OX=273121 GN=OMP18 PE=3 SV=1	0.438299	0.00774913
tr|Q7MA15|Q7MA15_WOLSU	WOLSU	2	Peptidyl-prolyl cis-trans isomerase OS=Wolinella succinogenes (strain ATCC 29543 / DSM 1740 / LMG 7466 / NCTC 11488 / FDC 602W) OX=273121 GN=SLYD PE=3 SV=1	0.638012	0.0593902
tr|Q7M7L2|Q7M7L2_WOLSU	WOLSU	7	Periplasmic serine endoprotease DegP-like OS=Wolinella succinogenes (strain ATCC 29543 / DSM 1740 / LMG 7466 / NCTC 11488 / FDC 602W) OX=273121 GN=HTRA PE=3 SV=1	0.969603	0.837408
tr|Q7MSU7|Q7MSU7_WOLSU	WOLSU	2	PHB domain-containing protein OS=Wolinella succinogenes (strain ATCC 29543 / DSM 1740 / LMG 7466 / NCTC 11488 / FDC 602W) OX=273121 GN=WS0091 PE=3 SV=1	1.27707	0.146848
tr|Q7M8S4|Q7M8S4_WOLSU	WOLSU	1	Phospho-2-dehydro-3-deoxyheptonate aldolase OS=Wolinella succinogenes (strain ATCC 29543 / DSM 1740 / LMG 7466 / NCTC 11488 / FDC 602W) OX=273121 GN=WS1452 PE=3 SV=1	3.7971	0.0011666
sp|Q7M9C1|PGK_WOLSU	WOLSU	2	Phosphoglycerate kinase OS=Wolinella succinogenes (strain ATCC 29543 / DSM 1740 / LMG 7466 / NCTC 11488 / FDC 602W) OX=273121 GN=pgk PE=3 SV=1	2.52898	0.00085171
sp|Q7M9X5|PUR7_WOLSU	WOLSU	3	Phosphoribosylaminoimidazole-succinocarboxamide synthase OS=Wolinella succinogenes (strain ATCC 29543 / DSM 1740 / LMG 7466 / NCTC 11488 / FDC 602W) OX=273121 GN=purC PE=3 SV=1	2.27376	0.000301272
tr|Q7M7P5|Q7M7P5_WOLSU	WOLSU	1	Phosphoribosylformylglycinamidine cyclo-ligase OS=Wolinella succinogenes (strain ATCC 29543 / DSM 1740 / LMG 7466 / NCTC 11488 / FDC 602W) OX=273121 GN=PURM PE=3 SV=1	0.712769	0.525884
sp|Q7M9L5|PURL_WOLSU	WOLSU	1	Phosphoribosylformylglycinamidine synthase subunit PurL OS=Wolinella succinogenes (strain ATCC 29543 / DSM 1740 / LMG 7466 / NCTC 11488 / FDC 602W) OX=273121 GN=purL PE=3 SV=1	1.74754	0.0975826
tr|Q7MSS3|Q7MSS3_WOLSU	WOLSU	1	Polyphosphate kinase OS=Wolinella succinogenes (strain ATCC 29543 / DSM 1740 / LMG 7466 / NCTC 11488 / FDC 602W) OX=273121 GN=WS0175 PE=3 SV=1	1.03681	0.956923
sp|Q7M9I4|PNP_WOLSU	WOLSU	1	Polyribonucleotide nucleotidyltransferase OS=Wolinella succinogenes (strain ATCC 29543 / DSM 1740 / LMG 7466 / NCTC 11488 / FDC 602W) OX=273121 GN=pnp PE=3 SV=1	1.40535	0.199453
sp|P31075|PSRA_WOLSU	WOLSU	3	Polysulfide reductase chain A OS=Wolinella succinogenes (strain ATCC 29543 / DSM 1740 / LMG 7466 / NCTC 11488 / FDC 602W) OX=273121 GN=psrA PE=1 SV=1	0.876	0.530286
tr|Q7MSQ2|Q7MSQ2_WOLSU	WOLSU	2	PpiC domain-containing protein OS=Wolinella succinogenes (strain ATCC 29543 / DSM 1740 / LMG 7466 / NCTC 11488 / FDC 602W) OX=273121 GN=WS0233 PE=4 SV=1	0.777144	0.190144
tr|Q7MSB3|Q7MSB3_WOLSU	WOLSU	3	PROTEASE OS=Wolinella succinogenes (strain ATCC 29543 / DSM 1740 / LMG 7466 / NCTC 11488 / FDC 602W) OX=273121 GN=WS0608 PE=3 SV=1	0.908986	0.702898
tr|Q7M8B9|Q7M8B9_WOLSU	WOLSU	3	PROTEIN DISULPHIDE ISOMERASE OS=Wolinella succinogenes (strain ATCC 29543 / DSM 1740 / LMG 7466 / NCTC 11488 / FDC 602W) OX=273121 GN=WS1747 PE=4 SV=1	0.959713	0.775978
sp|Q7MA34|GRPE_WOLSU	WOLSU	1	Protein GrpE OS=Wolinella succinogenes (strain ATCC 29543 / DSM 1740 / LMG 7466 / NCTC 11488 / FDC 602W) OX=273121 GN=grpE PE=3 SV=1	0.797722	0.419943
sp|Q7M919|SECA_WOLSU	WOLSU	1	Protein translocase subunit SecA OS=Wolinella succinogenes (strain ATCC 29543 / DSM 1740 / LMG 7466 / NCTC 11488 / FDC 602W) OX=273121 GN=secA PE=3 SV=1	1.32234	0.167157
tr|Q7M9R9|Q7M9R9_WOLSU	WOLSU	1	PROTON/GLUTAMATE SYMPORTER OS=Wolinella succinogenes (strain ATCC 29543 / DSM 1740 / LMG 7466 / NCTC 11488 / FDC 602W) OX=273121 GN=WS0722 PE=4 SV=1	1.01475	0.947361
tr|Q7M7U4|Q7M7U4_WOLSU	WOLSU	1	PURINE-BINDING CHEMOTAXIS PROTEIN CHEW OS=Wolinella succinogenes (strain ATCC 29543 / DSM 1740 / LMG 7466 / NCTC 11488 / FDC 602W) OX=273121 GN=WS2082 PE=4 SV=1	0.318796	0.00579665
tr|Q7MAL8|Q7MAL8_WOLSU	WOLSU	2	PUTATIVE 2 OS=Wolinella succinogenes (strain ATCC 29543 / DSM 1740 / LMG 7466 / NCTC 11488 / FDC 602W) OX=273121 GN=cysE PE=3 SV=1	0.578104	0.00867355
tr|Q7M876|Q7M876_WOLSU	WOLSU	3	PUTATIVE ACYL-CoA DEHYDROGENASE OS=Wolinella succinogenes (strain ATCC 29543 / DSM 1740 / LMG 7466 / NCTC 11488 / FDC 602W) OX=273121 GN=FADE16 PE=3 SV=1	0.50528	0.000225452
tr|Q7MAG8|Q7MAG8_WOLSU	WOLSU	3	PUTATIVE CHEMOTAXIS PROTEIN OS=Wolinella succinogenes (strain ATCC 29543 / DSM 1740 / LMG 7466 / NCTC 11488 / FDC 602W) OX=273121 GN=CHEV_1 PE=4 SV=1	0.995778	0.979533
tr|Q7M7Q8|Q7M7Q8_WOLSU	WOLSU	1	PUTATIVE D-2-HYDROXYACID DEHYDROGENASE OS=Wolinella succinogenes (strain ATCC 29543 / DSM 1740 / LMG 7466 / NCTC 11488 / FDC 602W) OX=273121 GN=WS2143 PE=3 SV=1	1.59145	0.108788
tr|Q7MA32|Q7MA32_WOLSU	WOLSU	1	PUTATIVE DNA-BINDING PROTEIN II (HB) OS=Wolinella succinogenes (strain ATCC 29543 / DSM 1740 / LMG 7466 / NCTC 11488 / FDC 602W) OX=273121 GN=HU PE=3 SV=1	1.96312	0.00926299
tr|Q7M9R6|Q7M9R6_WOLSU	WOLSU	1	PUTATIVE FERREDOXIN OS=Wolinella succinogenes (strain ATCC 29543 / DSM 1740 / LMG 7466 / NCTC 11488 / FDC 602W) OX=273121 GN=WS0730 PE=4 SV=1	1.13907	0.358608
tr|Q7MAM5|Q7MAM5_WOLSU	WOLSU	1	PUTATIVE FIBRONECTIN DOMAIN-CONTAINING LIPOPROTEIN OS=Wolinella succinogenes (strain ATCC 29543 / DSM 1740 / LMG 7466 / NCTC 11488 / FDC 602W) OX=273121 GN=WS0144 PE=4 SV=1	0.6459	0.00840419
tr|Q7M8X5|Q7M8X5_WOLSU	WOLSU	2	PUTATIVE MCP-DOMAIN SIGNAL TRANSDUCTION PROTEIN OS=Wolinella succinogenes (strain ATCC 29543 / DSM 1740 / LMG 7466 / NCTC 11488 / FDC 602W) OX=273121 GN=WS1337 PE=4 SV=1	1.06188	0.795097
tr|Q7MAF8|Q7MAF8_WOLSU	WOLSU	1	PUTATIVE METHYL-ACCEPTING CHEMOTAXIS PROTEIN OS=Wolinella succinogenes (strain ATCC 29543 / DSM 1740 / LMG 7466 / NCTC 11488 / FDC 602W) OX=273121 GN=WS0281 PE=4 SV=1	1.25667	0.31112
sp|Q7MSU1|Y139_WOLSU	WOLSU	1	Putative nickel insertion protein OS=Wolinella succinogenes (strain ATCC 29543 / DSM 1740 / LMG 7466 / NCTC 11488 / FDC 602W) OX=273121 GN=WS0139 PE=3 SV=1	0.738314	0.289262
tr|Q7M8X7|Q7M8X7_WOLSU	WOLSU	2	PUTATIVE PERIPLASMIC PROTEIN OS=Wolinella succinogenes (strain ATCC 29543 / DSM 1740 / LMG 7466 / NCTC 11488 / FDC 602W) OX=273121 GN=WS1329 PE=4 SV=1	1.15685	0.333685
tr|Q7M8V9|Q7M8V9_WOLSU	WOLSU	8	PUTATIVE PERIPLASMIC PROTEIN OS=Wolinella succinogenes (strain ATCC 29543 / DSM 1740 / LMG 7466 / NCTC 11488 / FDC 602W) OX=273121 GN=WS1370 PE=1 SV=1	0.524009	0.00632042
tr|Q7MAB5|Q7MAB5_WOLSU	WOLSU	1	PUTATIVE PROCESSING PROTEASE OS=Wolinella succinogenes (strain ATCC 29543 / DSM 1740 / LMG 7466 / NCTC 11488 / FDC 602W) OX=273121 GN=WS0352 PE=3 SV=1	1.30717	0.148487
tr|Q7M8X4|Q7M8X4_WOLSU	WOLSU	2	PUTATIVE SIGNAL-TRANSDUCTION SENSOR PROTEIN OS=Wolinella succinogenes (strain ATCC 29543 / DSM 1740 / LMG 7466 / NCTC 11488 / FDC 602W) OX=273121 GN=WS1338 PE=4 SV=1	0.544791	0.024171
tr|Q7M9Z6|Q7M9Z6_WOLSU	WOLSU	1	PUTATIVE TRANSCARBOXYLASE SUBUNIT OS=Wolinella succinogenes (strain ATCC 29543 / DSM 1740 / LMG 7466 / NCTC 11488 / FDC 602W) OX=273121 GN=WS0565 PE=4 SV=1	0.860235	0.647087
tr|Q7MAS8|Q7MAS8_WOLSU	WOLSU	1	PUTATIVE UDP-GLUCOSE 6-DEHYDROGENASE OS=Wolinella succinogenes (strain ATCC 29543 / DSM 1740 / LMG 7466 / NCTC 11488 / FDC 602W) OX=273121 GN=WBGT PE=3 SV=1	1.70616	0.0906225
tr|Q7M7R6|Q7M7R6_WOLSU	WOLSU	1	PYRUVATE FERREDOXIN OXIDOREDUCTASE, BETA SUBUNIT OS=Wolinella succinogenes (strain ATCC 29543 / DSM 1740 / LMG 7466 / NCTC 11488 / FDC 602W) OX=273121 GN=WS2128 PE=4 SV=1	0.619947	0.130732
tr|Q7M7R4|Q7M7R4_WOLSU	WOLSU	1	PYRUVATE FERREDOXIN OXIDOREDUCTASE, DELTA SUBUNIT OS=Wolinella succinogenes (strain ATCC 29543 / DSM 1740 / LMG 7466 / NCTC 11488 / FDC 602W) OX=273121 GN=WS2131 PE=4 SV=1	0.536183	0.0235647
tr|Q7M7R5|Q7M7R5_WOLSU	WOLSU	1	PYRUVATE SYNTHASE ALPHA SUBUNIT OS=Wolinella succinogenes (strain ATCC 29543 / DSM 1740 / LMG 7466 / NCTC 11488 / FDC 602W) OX=273121 GN=WS2130 PE=4 SV=1	0.990266	0.957549
tr|Q7M7R3|Q7M7R3_WOLSU	WOLSU	1	PYRUVATE:FERREDOXIN OXIDOREDUCTASE GAMMA SUBUNIT OS=Wolinella succinogenes (strain ATCC 29543 / DSM 1740 / LMG 7466 / NCTC 11488 / FDC 602W) OX=273121 GN=WS2132 PE=4 SV=1	1.3728	0.0842817
sp|P31875|CYBH_WOLSU	WOLSU	1	Quinone-reactive Ni/Fe-hydrogenase B-type cytochrome subunit OS=Wolinella succinogenes (strain ATCC 29543 / DSM 1740 / LMG 7466 / NCTC 11488 / FDC 602W) OX=273121 GN=hydC PE=1 SV=1	1.71156	0.0968272
sp|P31883|MBHL_WOLSU	WOLSU	16	Quinone-reactive Ni/Fe-hydrogenase large chain OS=Wolinella succinogenes (strain ATCC 29543 / DSM 1740 / LMG 7466 / NCTC 11488 / FDC 602W) OX=273121 GN=hydB PE=1 SV=3	1.34115	0.078206
sp|P31884|MBHS_WOLSU	WOLSU	8	Quinone-reactive Ni/Fe-hydrogenase small chain OS=Wolinella succinogenes (strain ATCC 29543 / DSM 1740 / LMG 7466 / NCTC 11488 / FDC 602W) OX=273121 GN=hydA PE=1 SV=2	1.18788	0.400603
tr|Q7M9W8|Q7M9W8_WOLSU	WOLSU	1	RESPONSE REGULATOR OS=Wolinella succinogenes (strain ATCC 29543 / DSM 1740 / LMG 7466 / NCTC 11488 / FDC 602W) OX=273121 GN=CHEY PE=4 SV=1	0.848229	0.562808
tr|Q7MSR4|Q7MSR4_WOLSU	WOLSU	1	Rhodanese domain-containing protein OS=Wolinella succinogenes (strain ATCC 29543 / DSM 1740 / LMG 7466 / NCTC 11488 / FDC 602W) OX=273121 GN=flhB PE=4 SV=1	2.47807	0.000487812
tr|Q7MRI3|Q7MRI3_WOLSU	WOLSU	4	Rhodanese domain-containing protein OS=Wolinella succinogenes (strain ATCC 29543 / DSM 1740 / LMG 7466 / NCTC 11488 / FDC 602W) OX=273121 GN=WS1327 PE=4 SV=1	0.710417	0.00091535
sp|Q7M8J0|KPRS_WOLSU	WOLSU	1	Ribose-phosphate pyrophosphokinase OS=Wolinella succinogenes (strain ATCC 29543 / DSM 1740 / LMG 7466 / NCTC 11488 / FDC 602W) OX=273121 GN=prs PE=3 SV=1	1.3662	0.0719331
tr|Q7MQN0|Q7MQN0_WOLSU	WOLSU	1	Ribosom_S30AE_C domain-containing protein OS=Wolinella succinogenes (strain ATCC 29543 / DSM 1740 / LMG 7466 / NCTC 11488 / FDC 602W) OX=273121 GN=WS2170 PE=4 SV=1	1.44337	0.437754
sp|Q7MAD8|RRF_WOLSU	WOLSU	2	Ribosome-recycling factor OS=Wolinella succinogenes (strain ATCC 29543 / DSM 1740 / LMG 7466 / NCTC 11488 / FDC 602W) OX=273121 GN=frr PE=3 SV=1	0.802521	0.27882
sp|Q7M7Z2|METK_WOLSU	WOLSU	6	S-adenosylmethionine synthase OS=Wolinella succinogenes (strain ATCC 29543 / DSM 1740 / LMG 7466 / NCTC 11488 / FDC 602W) OX=273121 GN=metK PE=3 SV=1	0.646609	0.00286449
sp|Q7MAR0|GLYA_WOLSU	WOLSU	4	Serine hydroxymethyltransferase OS=Wolinella succinogenes (strain ATCC 29543 / DSM 1740 / LMG 7466 / NCTC 11488 / FDC 602W) OX=273121 GN=glyA PE=3 SV=1	0.854701	0.243969
tr|Q7MRJ3|Q7MRJ3_WOLSU	WOLSU	3	SHSP domain-containing protein OS=Wolinella succinogenes (strain ATCC 29543 / DSM 1740 / LMG 7466 / NCTC 11488 / FDC 602W) OX=273121 GN=WS1299 PE=3 SV=1	1.33235	0.0174548
tr|Q79HP4|Q79HP4_WOLSU	WOLSU	5	SULFIDE DEHYDROGENASE OS=Wolinella succinogenes (strain ATCC 29543 / DSM 1740 / LMG 7466 / NCTC 11488 / FDC 602W) OX=273121 GN=SUD PE=4 SV=1	1.52587	0.0202766
tr|Q7M8L0|Q7M8L0_WOLSU	WOLSU	1	Superoxide dismutase OS=Wolinella succinogenes (strain ATCC 29543 / DSM 1740 / LMG 7466 / NCTC 11488 / FDC 602W) OX=273121 GN=SODB PE=3 SV=1	2.13434	0.0014383
tr|Q7M864|Q7M864_WOLSU	WOLSU	1	Superoxide dismutase OS=Wolinella succinogenes (strain ATCC 29543 / DSM 1740 / LMG 7466 / NCTC 11488 / FDC 602W) OX=273121 GN=WS1846 PE=3 SV=1	4.19051	0.0633445
sp|Q7M9F6|THIG_WOLSU	WOLSU	1	Thiazole synthase OS=Wolinella succinogenes (strain ATCC 29543 / DSM 1740 / LMG 7466 / NCTC 11488 / FDC 602W) OX=273121 GN=thiG PE=3 SV=1	0.994465	0.982623
tr|Q7M8K4|Q7M8K4_WOLSU	WOLSU	2	Thiol peroxidase OS=Wolinella succinogenes (strain ATCC 29543 / DSM 1740 / LMG 7466 / NCTC 11488 / FDC 602W) OX=273121 GN=tpx PE=3 SV=1	3.46564	4.00869e-05
tr|Q7MSG6|Q7MSG6_WOLSU	WOLSU	5	Thioredoxin OS=Wolinella succinogenes (strain ATCC 29543 / DSM 1740 / LMG 7466 / NCTC 11488 / FDC 602W) OX=273121 GN=TRXA PE=3 SV=1	0.663334	0.0755316
tr|Q7M9S6|Q7M9S6_WOLSU	WOLSU	25	THIOSULFATE REDUCTASE OS=Wolinella succinogenes (strain ATCC 29543 / DSM 1740 / LMG 7466 / NCTC 11488 / FDC 602W) OX=273121 GN=fdhA PE=3 SV=1	0.574738	5.20591e-05
sp|Q7MA16|TOLB_WOLSU	WOLSU	3	Tol-Pal system protein TolB OS=Wolinella succinogenes (strain ATCC 29543 / DSM 1740 / LMG 7466 / NCTC 11488 / FDC 602W) OX=273121 GN=tolB PE=3 SV=1	1.77186	0.00243307
tr|Q7M9D6|Q7M9D6_WOLSU	WOLSU	6	TONB-DEPENDENT RECEPTOR OS=Wolinella succinogenes (strain ATCC 29543 / DSM 1740 / LMG 7466 / NCTC 11488 / FDC 602W) OX=273121 GN=WS0993 PE=3 SV=1	1.04588	0.816724
tr|Q7M9M8|Q7M9M8_WOLSU	WOLSU	1	Transcription termination factor Rho OS=Wolinella succinogenes (strain ATCC 29543 / DSM 1740 / LMG 7466 / NCTC 11488 / FDC 602W) OX=273121 GN=RHO PE=3 SV=1	1.86145	0.19497
tr|Q7MA61|Q7MA61_WOLSU	WOLSU	1	Transcription termination/antitermination protein NusG OS=Wolinella succinogenes (strain ATCC 29543 / DSM 1740 / LMG 7466 / NCTC 11488 / FDC 602W) OX=273121 GN=NUSG PE=3 SV=1	0.362131	0.000352403
tr|Q7M9J3|Q7M9J3_WOLSU	WOLSU	2	TRANSCRIPTIONAL REGULATOR (LYSR FAMILY) OS=Wolinella succinogenes (strain ATCC 29543 / DSM 1740 / LMG 7466 / NCTC 11488 / FDC 602W) OX=273121 GN=LYSR1 PE=3 SV=1	0.683657	0.0418653
sp|Q7M7X5|IF2_WOLSU	WOLSU	1	Translation initiation factor IF-2 OS=Wolinella succinogenes (strain ATCC 29543 / DSM 1740 / LMG 7466 / NCTC 11488 / FDC 602W) OX=273121 GN=infB PE=3 SV=1	2.04296	0.0254085
sp|Q7M9L9|IF3_WOLSU	WOLSU	1	Translation initiation factor IF-3 OS=Wolinella succinogenes (strain ATCC 29543 / DSM 1740 / LMG 7466 / NCTC 11488 / FDC 602W) OX=273121 GN=infC PE=3 SV=1	2.18118	0.224932
tr|Q7MA31|Q7MA31_WOLSU	WOLSU	1	TRANSLATION INITIATION INHIBITOR OS=Wolinella succinogenes (strain ATCC 29543 / DSM 1740 / LMG 7466 / NCTC 11488 / FDC 602W) OX=273121 GN=WS0502 PE=3 SV=1	0.860777	0.596784
sp|Q7M7M4|TIG_WOLSU	WOLSU	5	Trigger factor OS=Wolinella succinogenes (strain ATCC 29543 / DSM 1740 / LMG 7466 / NCTC 11488 / FDC 602W) OX=273121 GN=tig PE=3 SV=1	1.0818	0.37796
sp|Q7M9S1|TRPB1_WOLSU	WOLSU	1	Tryptophan synthase beta chain 1 OS=Wolinella succinogenes (strain ATCC 29543 / DSM 1740 / LMG 7466 / NCTC 11488 / FDC 602W) OX=273121 GN=trpB1 PE=3 SV=1	2.4862	0.00761379
tr|Q7MAE4|Q7MAE4_WOLSU	WOLSU	3	TWO-COMPONENT REGULATOR OS=Wolinella succinogenes (strain ATCC 29543 / DSM 1740 / LMG 7466 / NCTC 11488 / FDC 602W) OX=273121 GN=WS0306 PE=4 SV=1	1.29676	0.109058
tr|Q7M7Q2|Q7M7Q2_WOLSU	WOLSU	1	Ubiquinol-cytochrome c reductase iron-sulfur subunit OS=Wolinella succinogenes (strain ATCC 29543 / DSM 1740 / LMG 7466 / NCTC 11488 / FDC 602W) OX=273121 GN=PETA PE=3 SV=1	1.02562	0.908703
tr|Q7MR55|Q7MR55_WOLSU	WOLSU	5	Uncharacterized protein OS=Wolinella succinogenes (strain ATCC 29543 / DSM 1740 / LMG 7466 / NCTC 11488 / FDC 602W) OX=273121 GN=fliD PE=4 SV=1	0.763983	0.179041
tr|Q7MSV3|Q7MSV3_WOLSU	WOLSU	5	Uncharacterized protein OS=Wolinella succinogenes (strain ATCC 29543 / DSM 1740 / LMG 7466 / NCTC 11488 / FDC 602W) OX=273121 GN=WS0076 PE=4 SV=1	0.198455	0.00177778
tr|Q7MST6|Q7MST6_WOLSU	WOLSU	1	Uncharacterized protein OS=Wolinella succinogenes (strain ATCC 29543 / DSM 1740 / LMG 7466 / NCTC 11488 / FDC 602W) OX=273121 GN=WS0149 PE=4 SV=1	2.57518	0.0155446
tr|Q7MSS5|Q7MSS5_WOLSU	WOLSU	1	Uncharacterized protein OS=Wolinella succinogenes (strain ATCC 29543 / DSM 1740 / LMG 7466 / NCTC 11488 / FDC 602W) OX=273121 GN=WS0173 PE=4 SV=1	0.979013	0.934244
tr|Q7MSR7|Q7MSR7_WOLSU	WOLSU	2	Uncharacterized protein OS=Wolinella succinogenes (strain ATCC 29543 / DSM 1740 / LMG 7466 / NCTC 11488 / FDC 602W) OX=273121 GN=WS0189 PE=4 SV=1	1.7495	0.015307
tr|Q7MSN0|Q7MSN0_WOLSU	WOLSU	3	Uncharacterized protein OS=Wolinella succinogenes (strain ATCC 29543 / DSM 1740 / LMG 7466 / NCTC 11488 / FDC 602W) OX=273121 GN=WS0286 PE=4 SV=1	1.08558	0.572322
tr|Q7MSI5|Q7MSI5_WOLSU	WOLSU	2	Uncharacterized protein OS=Wolinella succinogenes (strain ATCC 29543 / DSM 1740 / LMG 7466 / NCTC 11488 / FDC 602W) OX=273121 GN=WS0406 PE=4 SV=1	2.38231	0.00146761
tr|Q7MSG9|Q7MSG9_WOLSU	WOLSU	1	Uncharacterized protein OS=Wolinella succinogenes (strain ATCC 29543 / DSM 1740 / LMG 7466 / NCTC 11488 / FDC 602W) OX=273121 GN=WS0447 PE=4 SV=1	0.533734	0.0825339
tr|Q7MSE7|Q7MSE7_WOLSU	WOLSU	1	Uncharacterized protein OS=Wolinella succinogenes (strain ATCC 29543 / DSM 1740 / LMG 7466 / NCTC 11488 / FDC 602W) OX=273121 GN=WS0532 PE=4 SV=1	1.42358	0.437478
tr|Q7MSA6|Q7MSA6_WOLSU	WOLSU	24	Uncharacterized protein OS=Wolinella succinogenes (strain ATCC 29543 / DSM 1740 / LMG 7466 / NCTC 11488 / FDC 602W) OX=273121 GN=WS0627 PE=4 SV=1	0.476992	0.00238773
tr|Q7MS99|Q7MS99_WOLSU	WOLSU	5	Uncharacterized protein OS=Wolinella succinogenes (strain ATCC 29543 / DSM 1740 / LMG 7466 / NCTC 11488 / FDC 602W) OX=273121 GN=WS0645 PE=4 SV=1	0.563448	0.0123392
tr|Q7MS92|Q7MS92_WOLSU	WOLSU	2	Uncharacterized protein OS=Wolinella succinogenes (strain ATCC 29543 / DSM 1740 / LMG 7466 / NCTC 11488 / FDC 602W) OX=273121 GN=WS0663 PE=4 SV=1	1.38076	0.0535694
tr|Q7MS77|Q7MS77_WOLSU	WOLSU	1	Uncharacterized protein OS=Wolinella succinogenes (strain ATCC 29543 / DSM 1740 / LMG 7466 / NCTC 11488 / FDC 602W) OX=273121 GN=WS0688 PE=4 SV=1	1.46669	0.210714
tr|Q7MS49|Q7MS49_WOLSU	WOLSU	6	Uncharacterized protein OS=Wolinella succinogenes (strain ATCC 29543 / DSM 1740 / LMG 7466 / NCTC 11488 / FDC 602W) OX=273121 GN=WS0773 PE=4 SV=1	0.933739	0.605003
tr|Q7MS39|Q7MS39_WOLSU	WOLSU	1	Uncharacterized protein OS=Wolinella succinogenes (strain ATCC 29543 / DSM 1740 / LMG 7466 / NCTC 11488 / FDC 602W) OX=273121 GN=WS0802 PE=4 SV=1	1.08445	0.721204
tr|Q7MRW0|Q7MRW0_WOLSU	WOLSU	3	Uncharacterized protein OS=Wolinella succinogenes (strain ATCC 29543 / DSM 1740 / LMG 7466 / NCTC 11488 / FDC 602W) OX=273121 GN=WS1001 PE=3 SV=1	0.724212	0.110518
tr|Q7MRV1|Q7MRV1_WOLSU	WOLSU	4	Uncharacterized protein OS=Wolinella succinogenes (strain ATCC 29543 / DSM 1740 / LMG 7466 / NCTC 11488 / FDC 602W) OX=273121 GN=WS1019 PE=3 SV=1	0.834652	0.557756
tr|Q7MRL4|Q7MRL4_WOLSU	WOLSU	2	Uncharacterized protein OS=Wolinella succinogenes (strain ATCC 29543 / DSM 1740 / LMG 7466 / NCTC 11488 / FDC 602W) OX=273121 GN=WS1240 PE=4 SV=1	0.615805	0.0674207
tr|Q7MRG8|Q7MRG8_WOLSU	WOLSU	3	Uncharacterized protein OS=Wolinella succinogenes (strain ATCC 29543 / DSM 1740 / LMG 7466 / NCTC 11488 / FDC 602W) OX=273121 GN=WS1373 PE=4 SV=1	0.52074	0.000173997
tr|Q7MRG7|Q7MRG7_WOLSU	WOLSU	1	Uncharacterized protein OS=Wolinella succinogenes (strain ATCC 29543 / DSM 1740 / LMG 7466 / NCTC 11488 / FDC 602W) OX=273121 GN=WS1377 PE=4 SV=1	0.532862	0.00519723
tr|Q7MR36|Q7MR36_WOLSU	WOLSU	5	Uncharacterized protein OS=Wolinella succinogenes (strain ATCC 29543 / DSM 1740 / LMG 7466 / NCTC 11488 / FDC 602W) OX=273121 GN=WS1756 PE=4 SV=1	0.630914	0.00014304
tr|Q7MR23|Q7MR23_WOLSU	WOLSU	9	Uncharacterized protein OS=Wolinella succinogenes (strain ATCC 29543 / DSM 1740 / LMG 7466 / NCTC 11488 / FDC 602W) OX=273121 GN=WS1779 PE=4 SV=1	0.636099	0.0310984
tr|Q7MR22|Q7MR22_WOLSU	WOLSU	1	Uncharacterized protein OS=Wolinella succinogenes (strain ATCC 29543 / DSM 1740 / LMG 7466 / NCTC 11488 / FDC 602W) OX=273121 GN=WS1780 PE=4 SV=1	0.751746	0.339348
tr|Q7MR11|Q7MR11_WOLSU	WOLSU	1	Uncharacterized protein OS=Wolinella succinogenes (strain ATCC 29543 / DSM 1740 / LMG 7466 / NCTC 11488 / FDC 602W) OX=273121 GN=WS1830 PE=4 SV=1	0.502064	0.179812
tr|Q7MQW8|Q7MQW8_WOLSU	WOLSU	1	Uncharacterized protein OS=Wolinella succinogenes (strain ATCC 29543 / DSM 1740 / LMG 7466 / NCTC 11488 / FDC 602W) OX=273121 GN=WS1946 PE=4 SV=1	3.35439	0.0114341
tr|Q7MQP4|Q7MQP4_WOLSU	WOLSU	1	Uncharacterized protein OS=Wolinella succinogenes (strain ATCC 29543 / DSM 1740 / LMG 7466 / NCTC 11488 / FDC 602W) OX=273121 GN=WS2123 PE=4 SV=1	0.27028	5.41331e-05
tr|Q7MSV1|Q7MSV1_WOLSU	WOLSU	1	UPF0234 protein WS0081 OS=Wolinella succinogenes (strain ATCC 29543 / DSM 1740 / LMG 7466 / NCTC 11488 / FDC 602W) OX=273121 GN=WS0081 PE=3 SV=1	1.87737	0.00475057
tr|Q79HR6|Q79HR6_WOLSU	WOLSU	1	Usp domain-containing protein OS=Wolinella succinogenes (strain ATCC 29543 / DSM 1740 / LMG 7466 / NCTC 11488 / FDC 602W) OX=273121 GN=WS0834 PE=3 SV=1	0.240151	0.00129748
tr|Q7MQL2|Q7MQL2_WOLSU	WOLSU	3	YceI domain-containing protein OS=Wolinella succinogenes (strain ATCC 29543 / DSM 1740 / LMG 7466 / NCTC 11488 / FDC 602W) OX=273121 GN=WS2216 PE=4 SV=1	0.680994	0.0845687
tr|Q7MQP7|Q7MQP7_WOLSU	WOLSU	2	zf-RING_7 domain-containing protein OS=Wolinella succinogenes (strain ATCC 29543 / DSM 1740 / LMG 7466 / NCTC 11488 / FDC 602W) OX=273121 GN=WS2117 PE=3 SV=1	1.69291	0.0849264
