# Supplementary material for: Elucidating metabolic tuning of mixed purple phototrophic bacteria biofilms in photoheterotrophic conditions through microbial photo-electrosynthesis
Source: Research Square preprint supplement (doi:10.21203/rs.3.rs-2467581/v1), 2023-06-26
Supplement: Supplementary file 2 [file c524d4620e311cb92ad6609b.xlsx]

## Sheet: Taxonomy complete
# Constructed from biom file							0.4V initial	0.4V final	0.8V initial	0.8V final	OC initial	OC final	Dark initial	Dark final
d__Bacteria	p__Firmicutes	c__Clostridia	__	__	__	__	0	0	0	0	0	0	157	121
	p__Firmicutes	c__Clostridia	o__Christensenellales	f__Christensenellaceae	__	__	0	0	0	0	0	9	10	0
	p__Firmicutes	c__Clostridia	o__Oscillospirales	__	__	__	0	0	0	7	14	8	0	7
	p__Firmicutes	c__Clostridia	o__Oscillospirales	f__Oscillospiraceae	__	__	0	271	108	305	92	71	95	65
	p__Firmicutes	c__Clostridia	o__Oscillospirales	f__Ruminococcaceae	__	__	0	32	48	54	138	73	98	27
	p__Proteobacteria	c__Alphaproteobacteria	o__Rhizobiales	f__Rhizobiaceae	__	__	0	10	0	0	0	13	0	0
	p__Proteobacteria	c__Alphaproteobacteria	o__Rhizobiales	f__Xanthobacteraceae	__	__	0	0	0	0	11	0	0	0
	p__Proteobacteria	c__Gammaproteobacteria	o__Enterobacterales	__	__	__	0	224	10	5	35	30	94	281
	p__Proteobacteria	c__Gammaproteobacteria	o__Enterobacterales	f__Enterobacteriaceae	__	__	0	6511	0	0	50	158	244	314
	p__Firmicutes	c__Clostridia	o__Oscillospirales	f__[Eubacterium]_coprostanoligenes_group	g__[Eubacterium]_coprostanoligenes_group	__	0	11	0	0	6	0	9	0
	p__Firmicutes	c__Clostridia	o__Oscillospirales	f__Ethanoligenenaceae	g__Acetanaerobacterium	s__uncultured_bacterium	0	10	5	0	34	51	52	18
	p__Firmicutes	c__Bacilli	o__Acholeplasmatales	f__Acholeplasmataceae	g__Acholeplasma	s__Acholeplasma_manati	0	0	0	0	0	0	162	223
	p__Firmicutes	c__Bacilli	o__Acholeplasmatales	f__Acholeplasmataceae	g__Acholeplasma	s__Acholeplasma_vituli	0	0	0	0	0	0	0	0
	p__Proteobacteria	c__Gammaproteobacteria	o__Burkholderiales	f__Alcaligenaceae	g__Achromobacter	__	0	9	0	0	5	6	0	8
	p__Proteobacteria	c__Gammaproteobacteria	o__Burkholderiales	f__Alcaligenaceae	g__Alcaligenes	__	0	61	0	0	0	3	0	0
	p__Firmicutes	c__Clostridia	o__Oscillospirales	f__Ruminococcaceae	g__Anaerofilum	__	0	0	2	5	0	0	0	0
	p__Firmicutes	c__Negativicutes	o__Veillonellales-Selenomonadales	f__Sporomusaceae	g__Anaerosporomusa	s__uncultured_bacterium	0	169	138	465	1344	2878	324	631
	p__Firmicutes	c__Clostridia	o__Lachnospirales	f__Lachnospiraceae	g__Anaerostignum	s__Anaerotignum_propionicum	0	17	29	151	14	53	0	0
	p__Firmicutes	c__Clostridia	o__Peptostreptococcales-Tissierellales	f__Anaerovoracaceae	g__Anaerovorax	__	0	107	97	153	328	266	175	92
	p__Firmicutes	c__Clostridia	o__Peptostreptococcales-Tissierellales	f__Anaerovoracaceae	g__Anaerovorax	s__Anaerovorax_sp,	0	49	0	0	55	23	0	0
	p__Proteobacteria	c__Alphaproteobacteria	o__Rhizobiales	f__Beijerinckiaceae	g__Bosea	__	0	48	72	14	267	0	0	0
	p__Proteobacteria	c__Alphaproteobacteria	o__Rhizobiales	f__Xanthobacteraceae	g__Bradyrhizobium	__	0	0	0	0	78	0	0	8
	p__Proteobacteria	c__Alphaproteobacteria	o__Caulobacterales	f__Caulobacteraceae	g__Brevundimonas	__	0	7	0	0	0	0	0	0
	p__Patescibacteria	c__Parcubacteria	o__Candidatus_Nomurabacteria	f__Candidatus_Nomurabacteria	g__Candidatus_Nomurabacteria	s__uncultured_bacterium	0	0	0	0	0	0	200	299
	p__Firmicutes	c__Clostridia	o__Oscillospirales	f__Ruminococcaceae	g__Candidatus_Soleaferrea	s__uncultured_Ruminococcaceae	0	0	0	5	0	0	4	0
	p__Firmicutes	c__Clostridia	o__Christensenellales	f__Christensenellaceae	g__Christensenellaceae_R-7_group	__	0	88	12	73	337	369	131	260
	p__Firmicutes	c__Clostridia	o__Christensenellales	f__Christensenellaceae	g__Christensenellaceae_R-7_group	s__uncultured_Christensenellaceae	0	16	14	9	0	54	59	37
	p__Bacteroidota	c__Bacteroidia	o__Flavobacteriales	f__Weeksellaceae	g__Chryseobacterium	__	0	160	0	0	0	0	0	0
	p__Desulfobacterota	c__Desulfovibrionia	o__Desulfovibrionales	f__Desulfovibrionaceae	g__Desulfovibrio	__	0	57	489	495	2304	1515	623	777
	p__Desulfobacterota	c__Desulfovibrionia	o__Desulfovibrionales	f__Desulfovibrionaceae	g__Desulfovibrio	s__Desulfovibrio_oxamicus	0	2102	1483	2013	9073	6178	923	1503
	p__Desulfobacterota	c__Desulfuromonadia	o__Desulfuromonadia	f__Desulfuromonadaceae	g__Desulfuromonadaceae	__	0	0	0	0	0	41	1134	2273
	p__Proteobacteria	c__Gammaproteobacteria	o__Xanthomonadales	f__Rhodanobacteraceae	g__Dyella	__	0	0	0	0	0	0	0	0
	p__Bacteroidota	c__Bacteroidia	o__Bacteroidales	f__Dysgonomonadaceae	g__Dysgonomonas	__	0	691	18	41	0	17	0	4
	p__Bacteroidota	c__Bacteroidia	o__Bacteroidales	f__Dysgonomonadaceae	g__Dysgonomonas	s__uncultured_Dysgonomonas	0	689	77	216	37	152	51	118
	p__Firmicutes	c__Bacilli	o__Lactobacillales	f__Enterococcaceae	g__Enterococcus	__	0	328	1121	3340	3592	15404	2170	7289
	p__Firmicutes	c__Bacilli	o__Erysipelotrichales	f__Erysipelotrichaceae	g__Erysipelothrix	s__bacterium_enrichment	0	37	0	7	0	5	10	12
	p__Firmicutes	c__Clostridia	o__Peptostreptococcales-Tissierellales	f__Fusibacteraceae	g__Fusibacter	__	0	64	0	0	0	0	0	0
	p__Firmicutes	c__Clostridia	o__Peptostreptococcales-Tissierellales	f__Fusibacteraceae	g__Fusibacter	s__Fusibacter_fontis	0	205	4	31	0	0	0	0
	p__Deferribacterota	c__Deferribacteres	o__Deferribacterales	f__Deferribacteraceae	g__Geovibrio	__	0	0	0	0	0	0	0	195
	p__Deferribacterota	c__Deferribacteres	o__Deferribacterales	f__Deferribacteraceae	g__Geovibrio	s__uncultured_bacterium	0	0	0	0	0	26	0	262
	p__Firmicutes	c__Clostridia	o__Clostridia	f__Gracilibacteraceae	g__Gracilibacter	__	0	0	4	19	0	15	0	0
	p__Firmicutes	c__Clostridia	o__Oscillospirales	f__Oscillospirales	g__Hydrogenoanaerobacterium	__	0	124	43	44	21	21	251	8
	p__Firmicutes	c__Clostridia	o__Oscillospirales	f__Oscillospirales	g__Hydrogenoanaerobacterium	s__uncultured_bacterium	0	23	103	180	0	0	15	0
	p__Firmicutes	c__Clostridia	o__Oscillospirales	f__Oscillospiraceae	g__Intestinimonas	__	0	79	11	13	11	11	0	5
	p__Proteobacteria	c__Alphaproteobacteria	o__Rhizobiales	f__Labraceae	g__Labrys	__	0	0	0	0	3	0	6	3
	p__Firmicutes	c__Clostridia	o__Lachnospirales	f__Lachnospiraceae	g__Lachnoclostridium	__	0	6	10	14	46	77	3	5
	p__Bacteroidota	c__Bacteroidia	o__Sphingobacteriales	f__Lentimicrobiaceae	g__Lentimicrobium	__	0	191	119	247	610	2469	2583	4367
	p__Bacteroidota	c__Bacteroidia	o__Bacteroidales	f__Tannerellaceae	g__Macellibacteroides	__	0	26	0	0	15	53	42	30
	p__Bacteroidota	c__Bacteroidia	o__Bacteroidales	f__Marinilabiliaceae	g__Mangroviflexus	s__uncultured_bacterium	0	0	0	0	0	0	11	0
	p__Proteobacteria	c__Alphaproteobacteria	o__Rhizobiales	f__Rhizobiaceae	g__Mesorhizobium	__	0	15	22	9	66	6	39	29
	p__Proteobacteria	c__Alphaproteobacteria	o__Rhizobiales	f__Beijerinckiaceae	g__Methylobacterium-Methylorubrum	__	0	0	0	0	0	8	31	16
	p__Actinobacteriota	c__Actinobacteria	o__Micrococcales	f__Microbacteriaceae	g__Microbacterium	__	0	0	0	0	18	0	0	0
	p__Spirochaetota	c__MVP-15	o__MVP-15	f__MVP-15	g__MVP-15	s__uncultured_bacterium	0	0	0	0	0	0	1796	1447
	p__Firmicutes	c__Clostridia	o__Oscillospirales	f__Oscillospiraceae	g__NK4A214_group	__	0	7	0	26	0	51	7	10
	p__Firmicutes	c__Clostridia	o__Oscillospirales	f__Oscillospiraceae	g__NK4A214_group	s__uncultured_Firmicutes	0	0	0	0	0	0	0	0
	p__Firmicutes	c__Clostridia	o__Oscillospirales	f__Oscillospiraceae	g__Oscillibacter	s__uncultured_Oscillibacter	0	8	0	11	0	0	0	0
	p__Bacteroidota	c__Bacteroidia	o__Bacteroidales	f__Paludibacteraceae	g__Paludibacter	s__uncultured_Dysgonomonas	0	0	0	3	0	0	109	89
	p__Bacteroidota	c__Bacteroidia	o__Bacteroidales	f__Dysgonomonadaceae	g__Petrimonas	__	0	11	0	8	16	53	184	267
	p__Proteobacteria	c__Alphaproteobacteria	o__Rhizobiales	f__Pleomorphomonadaceae	g__Pleomorphomonas	__	0	1675	0	0	137	69	8	15
	p__Proteobacteria	c__Alphaproteobacteria	o__Rhizobiales	f__Pleomorphomonadaceae	g__Pleomorphomonas	s__uncultured_bacterium	0	137	16	26	155	122	0	9
	p__Bacteroidota	c__Bacteroidia	o__Bacteroidales	f__Prevotellaceae	g__Prevotella	__	0	0	0	0	12	0	0	0
	p__Firmicutes	c__Clostridia	o__Clostridiales	f__Clostridiaceae	g__Proteiniclasticum	__	0	0	0	6	7	5	23	0
	p__Bacteroidota	c__Bacteroidia	o__Bacteroidales	f__Dysgonomonadaceae	g__Proteiniphilum	__	0	124	95	306	124	447	39	76
	p__Proteobacteria	c__Gammaproteobacteria	o__Pseudomonadales	f__Pseudomonadaceae	g__Pseudomonas	__	0	5	5	0	12	0	5	7
	p__Proteobacteria	c__Gammaproteobacteria	o__Pseudomonadales	f__Pseudomonadaceae	g__Pseudomonas	s__Pseudomonas_delhiensis	0	519	0	0	0	0	0	0
	p__Proteobacteria	c__Gammaproteobacteria	o__Burkholderiales	f__Burkholderiaceae	g__Ralstonia	__	0	18	48	16	206	41	29	22
	p__Proteobacteria	c__Gammaproteobacteria	o__Enterobacterales	f__Enterobacteriaceae	g__Raoultella	__	0	2401	0	0	0	0	0	0
	p__Proteobacteria	c__Alphaproteobacteria	o__Rhodobacterales	f__Rhodobacteraceae	g__Rhodobacter	__	0	20785	9140	5489	8165	2149	1748	651
	p__Actinobacteriota	c__Actinobacteria	o__Corynebacteriales	f__Nocardiaceae	g__Rhodococcus	__	0	0	0	0	4	0	2	5
	p__Proteobacteria	c__Alphaproteobacteria	o__Rhizobiales	f__Xanthobacteraceae	g__Rhodopseudomonas	__	0	13237	22705	10380	12083	7363	6515	2634
	p__Proteobacteria	c__Gammaproteobacteria	o__Burkholderiales	f__Comamonadaceae	g__Rubrivivax	s__Rubrivivax_gelatinosus	0	433	538	69	272	219	316	261
	p__Firmicutes	c__Clostridia	o__Clostridia	f__Hungateiclostridiaceae	g__Ruminiclostridium	__	0	20	22	56	95	203	17	17
	p__Firmicutes	c__Clostridia	o__Peptostreptococcales-Tissierellales	f__Sedimentibacteraceae	g__Sedimentibacter	__	0	0	0	0	0	77	221	227
	p__Proteobacteria	c__Gammaproteobacteria	o__Alteromonadales	f__Shewanellaceae	g__Shewanella	__	0	3839	39	0	0	0	0	0
	p__Proteobacteria	c__Gammaproteobacteria	o__Alteromonadales	f__Shewanellaceae	g__Shewanella	s__Shewanella_putrefaciens	0	0	0	48	0	0	0	9
	p__Proteobacteria	c__Alphaproteobacteria	o__Rhizobiales	f__Rhizobiaceae	g__Shinella	__	0	0	0	0	0	0	0	0
	p__Spirochaetota	c__Spirochaetia	o__Spirochaetales	f__Spirochaetaceae	g__Sphaerochaeta	s__Sphaerochaeta_globosa	0	0	0	40	18	48	45	64
	p__Proteobacteria	c__Alphaproteobacteria	o__Sphingomonadales	f__Sphingomonadaceae	g__Sphingomonas	__	0	24	29	13	183	87	139	141
	p__Proteobacteria	c__Gammaproteobacteria	o__Xanthomonadales	f__Xanthomonadaceae	g__Stenotrophomonas	__	0	30	0	0	0	0	0	8
	p__Synergistota	c__Synergistia	o__Synergistales	f__Synergistaceae	g__Syner-01	s__metagenome	0	0	0	0	96	116	104	72
	p__Synergistota	c__Synergistia	o__Synergistales	f__Synergistaceae	g__Syner-01	s__Synergistales_bacterium	0	0	0	0	193	322	437	248
	p__Firmicutes	c__Desulfitobacteriia	o__Desulfitobacteriales	f__Desulfitobacteriales	g__TC1	s__uncultured_Firmicutes	0	3	0	11	7	26	11	21
	p__Firmicutes	c__Bacilli	o__Lactobacillales	f__Carnobacteriaceae	g__Trichococcus	__	0	0	0	0	0	0	0	17
	p__Firmicutes	c__Clostridia	o__Lachnospirales	f__Lachnospiraceae	g__Tyzzerella	s__bacterium_NLAE-zl-C441	0	0	3	17	0	0	3	2
	p__Bacteroidota	c__Bacteroidia	o__Bacteroidales	f__Rikenellaceae	g__uncultured	__	0	0	0	0	5	22	450	365
	p__Firmicutes	c__Clostridia	o__Oscillospirales	f__Oscillospiraceae	g__uncultured	__	0	46	21	66	10	16	4	0
	p__Firmicutes	c__uncultured	o__uncultured	f__uncultured	g__uncultured	__	0	12	11	0	11	23	23	14
	p__Proteobacteria	c__Alphaproteobacteria	o__Rhizobiales	f__Xanthobacteraceae	g__uncultured	__	0	15	34	0	179	0	0	0
	p__Firmicutes	c__uncultured	o__uncultured	f__uncultured	g__uncultured	s__bacterium_MB7-1	0	11	33	24	9	13	58	19
	p__Bacteroidota	c__Bacteroidia	o__Bacteroidales	f__Paludibacteraceae	g__uncultured	s__uncultured_bacterium	0	5	4	10	11	79	362	167
	p__Firmicutes	c__Negativicutes	o__Veillonellales-Selenomonadales	f__Sporomusaceae	g__uncultured	s__uncultured_bacterium	0	0	0	0	0	0	469	985
	p__Spirochaetota	c__Spirochaetia	o__Spirochaetales	f__Spirochaetaceae	g__uncultured	s__uncultured_prokaryote	0	0	0	0	0	0	100	105
	p__Campilobacterota	c__Campylobacteria	o__Campylobacterales	f__Helicobacteraceae	g__Wolinella	s__Wolinella_succinogenes	14	13312	32079	18580	23960	30432	38667	32700
							14	69114	68861	43120	64574	72037	61430	59840

## Sheet: Taxonomy-Genusx100
Genus (%)	0.4V initial	0.4V final	0.8V initial	0.8V final	OC initial	OC final	Dark initial	Dark final
[Eubacterium-genero]_coprostanoligenes_group__		0.0159157			0.00929167		0.0146111			Legend
1-Christensenellaceae family						0.012492	0.0162346				PPB
1-Clostridia clase							0.254883	0.201798			Not genus
1-Enterobacterales Order		0.324102	0.014522	0.0115955	0.0542014	0.0416401	0.152605	0.468638			Wolinella succinogenes
1-Enterobacteriaceae family		9.42067			0.0774305	0.219304	0.396123	0.523674			Other bacteria < 1%
1-Oscillospiraceae family		0.392106	0.156838	0.707328	0.142472	0.0985481	0.154228	0.108404
1-Oscillospirales order				0.0162338	0.0216806	0.011104		0.0116743
1-Rhizobiaceae family		0.0144688				0.018044
1-Ruminococcaceae family		0.0463003	0.0697056	0.125232	0.213708	0.101324	0.159099	0.0450293
1-Xanthobacteraceae family					0.0170347
Not identified genus	0	10.2136	0.241065	0.86039	0.535819	0.502457	3.52777	4.11934
Other bacteria < 1%		3.90225	1.65551	4.44805	5.19869	4.27088	4.78757	5.30614
Anaerosporomusa				1.07839	2.08133	3.99467		1.05235
Bradyrhizobium					-0.120792			-0.013342
Desulfovibrio		3.12382	2.86374	5.81633	17.6185	10.6779	2.50986	3.80247
Desulfuromonadaceae							1.841	3.7908
Dysgonomonas		1.9967
Enterococcus			1.62792	7.74583	5.56261	21.3808	3.5229	12.1562
Lentimicrobium sp.						3.42698	4.19339	7.28307
MVP-15s							2.91573	2.41324
Pleomorphomonas		2.62176
Proteiniphilum
Pseudomonas
Raoultella		3.47397
Rhodobacter		-30.0735	-13.2731	-12.7296	-12.6444	-2.98282	-2.8378	-1.08571
Rhodopseudomonas			-32.9722	-24.0724	-18.7119	-10.2199	-10.5768	-4.39286
Rubrivivax		-0.626501	-0.781284	-0.160019	-0.421222	-0.303972	-0.513012	-0.435283
Shewanella		5.55459
Uncultured							2.37999	2.76013
Wolinella succinogenes	100	19.2609	46.5851	43.0891	37.1047	42.2397	62.7742	54.5354
