# Supplementary material for: Elucidating metabolic tuning of mixed purple phototrophic bacteria biofilms in photoheterotrophic conditions through microbial photo-electrosynthesis
Source: Research Square preprint supplement (doi:10.21203/rs.3.rs-2467581/v1), 2023-06-26
Supplement: Supplementary file 3 [file eef0ccba18f289071a514672.xlsx]

## Sheet: R. faecalis
ID_PROT	species	# peptides	Name	0,8v/0v norm	p value
tr|A0A318TJ74|A0A318TJ74_9BRAD	9BRAD	11	Phosphoenolpyruvate carboxykinase (ATP) OS=Rhodopseudomonas faecalis OX=99655 GN=pckA PE=3 SV=1	2.04888	0.00866274
tr|A0A318TE67|A0A318TE67_9BRAD	9BRAD	4	Phosphoglycerate kinase OS=Rhodopseudomonas faecalis OX=99655 GN=pgk PE=3 SV=1	2.51913	0.0367948
tr|A0A318TVC6|A0A318TVC6_9BRAD	9BRAD	7	Ribulose bisphosphate carboxylase OS=Rhodopseudomonas faecalis OX=99655 GN=cbbM PE=3 SV=1	2.33419	0.0201072
tr|A0A318TM06|A0A318TM06_9BRAD	9BRAD	2	Enolase OS=Rhodopseudomonas faecalis OX=99655 GN=eno PE=3 SV=1	2.2706	0.0378168
tr|A0A318TD31|A0A318TD31_9BRAD	9BRAD	6	Cytochrome c OS=Rhodopseudomonas faecalis OX=99655 GN=BJ122_110128 PE=4 SV=1	3.09247	0.00313571
tr|A0A318TR75|A0A318TR75_9BRAD	9BRAD	2	Ubiquinol-cytochrome c reductase iron-sulfur subunit OS=Rhodopseudomonas faecalis OX=99655 GN=BJ122_10358 PE=3 SV=1	1.1423	0.484737
tr|A0A318TNY1|A0A318TNY1_9BRAD	9BRAD	2	Porin OS=Rhodopseudomonas faecalis OX=99655 GN=BJ122_10686 PE=3 SV=1	3.42213	0.0634701
tr|A0A318TIA3|A0A318TIA3_9BRAD	9BRAD	3	Cytochrome b OS=Rhodopseudomonas faecalis OX=99655 GN=BJ122_10357 PE=3 SV=1	1.21964	0.62264
tr|A0A318TA21|A0A318TA21_9BRAD	9BRAD	1	Cytochrome c556 OS=Rhodopseudomonas faecalis OX=99655 GN=BJ122_12037 PE=4 SV=1	1.1181	0.804191
tr|A0A318TN21|A0A318TN21_9BRAD	9BRAD	3	Ubiquinol-cytochrome c reductase iron-sulfur subunit OS=Rhodopseudomonas faecalis OX=99655 GN=BJ122_10371 PE=3 SV=1	0.914893	0.470224
tr|A0A318TGN9|A0A318TGN9_9BRAD	9BRAD	2	Cytochrome b pre-mRNA-processing protein 3 OS=Rhodopseudomonas faecalis OX=99655 GN=BJ122_10581 PE=3 SV=1	0.658561	0.0455669
tr|A0A318TB01|A0A318TB01_9BRAD	9BRAD	12	Isocitrase OS=Rhodopseudomonas faecalis OX=99655 GN=BJ122_13313 PE=4 SV=1	2.0576	0.0181752
tr|A0A318TJM4|A0A318TJM4_9BRAD	9BRAD	9	Phasin OS=Rhodopseudomonas faecalis OX=99655 GN=BJ122_10249 PE=4 SV=1	0.942201	0.892261
tr|A0A318TD51|A0A318TD51_9BRAD	9BRAD	1	Phasin OS=Rhodopseudomonas faecalis OX=99655 GN=BJ122_11156 PE=4 SV=1	2.02808	0.172213
tr|A0A318TFD2|A0A318TFD2_9BRAD	9BRAD	3	Phasin OS=Rhodopseudomonas faecalis OX=99655 GN=BJ122_11157 PE=4 SV=1	3.05977	0.0172288
tr|A0A318T8N2|A0A318T8N2_9BRAD	9BRAD	4	Acetyl-CoA acetyltransferase OS=Rhodopseudomonas faecalis OX=99655 GN=BJ122_12152 PE=3 SV=1	2.8259	0.00302456
tr|A0A318TA66|A0A318TA66_9BRAD	9BRAD	2	3-oxoacyl-[acyl-carrier-protein] reductase /acetoacetyl-CoA reductase OS=Rhodopseudomonas faecalis OX=99655 GN=BJ122_12153 PE=3 SV=1	2.38804	0.00121699
tr|A0A318TQH8|A0A318TQH8_9BRAD	9BRAD	1	Acyl-CoA dehydrogenase OS=Rhodopseudomonas faecalis OX=99655 GN=BJ122_11631 PE=3 SV=1	3.42973	0.000428621
tr|A0A318TLU6|A0A318TLU6_9BRAD	9BRAD	1	Enoyl-CoA hydratase OS=Rhodopseudomonas faecalis OX=99655 GN=BJ122_10262 PE=3 SV=1	2.07709	0.0979552
tr|A0A318TI86|A0A318TI86_9BRAD	9BRAD	14	Short chain enoyl-CoA hydratase /3-hydroxyacyl-CoA dehydrogenase OS=Rhodopseudomonas faecalis OX=99655 GN=BJ122_103227 PE=3 SV=1	1.50561	0.0713622
tr|A0A318TUG1|A0A318TUG1_9BRAD	9BRAD	6	Propionyl-CoA carboxylase carboxyltransferase subunit OS=Rhodopseudomonas faecalis OX=99655 GN=BJ122_10711 PE=4 SV=1	1.13876	0.255432
tr|A0A318TNP4|A0A318TNP4_9BRAD	9BRAD	1	Pyruvate dehydrogenase E1 component subunit beta OS=Rhodopseudomonas faecalis OX=99655 GN=BJ122_101260 PE=4 SV=1	1.62527	0.0616352
tr|A0A318TQ69|A0A318TQ69_9BRAD	9BRAD	8	Pyruvate, orthophosphate dikinase OS=Rhodopseudomonas faecalis OX=99655 GN=BJ122_10463 PE=3 SV=1	1.32496	0.0352539
tr|A0A318TKR2|A0A318TKR2_9BRAD	9BRAD	4	Citrate synthase OS=Rhodopseudomonas faecalis OX=99655 GN=BJ122_101151 PE=3 SV=1	3.21887	0.000835151
tr|A0A318TLX9|A0A318TLX9_9BRAD	9BRAD	5	Citrate synthase OS=Rhodopseudomonas faecalis OX=99655 GN=BJ122_101226 PE=3 SV=1	1.69877	0.00544315
tr|A0A318TJR8|A0A318TJR8_9BRAD	9BRAD	6	Malate dehydrogenase OS=Rhodopseudomonas faecalis OX=99655 GN=mdh PE=3 SV=1	1.52887	0.00635938
tr|A0A318T8H9|A0A318T8H9_9BRAD	9BRAD	5	Succinate dehydrogenase flavoprotein subunit OS=Rhodopseudomonas faecalis OX=99655 GN=BJ122_12268 PE=3 SV=1	1.85828	0.0492839
tr|A0A318TC46|A0A318TC46_9BRAD	9BRAD	3	Succinate--CoA ligase [ADP-forming] subunit alpha OS=Rhodopseudomonas faecalis OX=99655 GN=sucD PE=3 SV=1	2.60124	0.013518
tr|A0A318TBR7|A0A318TBR7_9BRAD	9BRAD	6	Succinate--CoA ligase [ADP-forming] subunit beta OS=Rhodopseudomonas faecalis OX=99655 GN=sucC PE=3 SV=1	1.82548	0.00789169
tr|A0A318TAB1|A0A318TAB1_9BRAD	9BRAD	7	Malate synthase G OS=Rhodopseudomonas faecalis OX=99655 GN=glcB PE=3 SV=1	1.3857	0.167014
tr|A0A318TCB9|A0A318TCB9_9BRAD	9BRAD	2	Isovaleryl-CoA dehydrogenase OS=Rhodopseudomonas faecalis OX=99655 GN=BJ122_13211 PE=3 SV=1	2.07148	0.0506425
tr|A0A318TK44|A0A318TK44_9BRAD	9BRAD	1	(R)-citramalate synthase OS=Rhodopseudomonas faecalis OX=99655 GN=BJ122_102312 PE=3 SV=1	0.176219	0.00567256
tr|A0A318U076|A0A318U076_9BRAD	9BRAD	3	10 kDa chaperonin OS=Rhodopseudomonas faecalis OX=99655 GN=groS PE=3 SV=1	3.13006	0.00510934
tr|A0A318TUC7|A0A318TUC7_9BRAD	9BRAD	2	1-deoxy-D-xylulose 5-phosphate reductoisomerase OS=Rhodopseudomonas faecalis OX=99655 GN=dxr PE=3 SV=1	0.313739	0.00103034
tr|A0A318TD48|A0A318TD48_9BRAD	9BRAD	2	1-deoxy-D-xylulose-5-phosphate synthase OS=Rhodopseudomonas faecalis OX=99655 GN=dxs PE=3 SV=1	3.2254	0.00910168
tr|A0A318T6Z1|A0A318T6Z1_9BRAD	9BRAD	2	2,3,4,5-tetrahydropyridine-2,6-dicarboxylate N-succinyltransferase OS=Rhodopseudomonas faecalis OX=99655 GN=dapD PE=3 SV=1	1.59655	0.0844973
tr|A0A318TBU7|A0A318TBU7_9BRAD	9BRAD	3	2,3-bisphosphoglycerate-dependent phosphoglycerate mutase OS=Rhodopseudomonas faecalis OX=99655 GN=gpmA PE=3 SV=1	1.40163	0.244908
tr|A0A318TEE2|A0A318TEE2_9BRAD	9BRAD	1	2Fe-2S ferredoxin OS=Rhodopseudomonas faecalis OX=99655 GN=BJ122_12021 PE=3 SV=1	2.21956	0.0537676
tr|A0A318TK56|A0A318TK56_9BRAD	9BRAD	1	2-isopropylmalate synthase OS=Rhodopseudomonas faecalis OX=99655 GN=leuA PE=3 SV=1	0.480919	0.279765
tr|A0A318TKK7|A0A318TKK7_9BRAD	9BRAD	7	2-methylcitrate dehydratase OS=Rhodopseudomonas faecalis OX=99655 GN=BJ122_101150 PE=3 SV=1	2.41191	0.0359775
tr|A0A1H8UFK0|A0A1H8UFK0_9BRAD	9BRAD	1	2-methylcitrate dehydratase OS=Rhodopseudomonas pseudopalustris OX=1513892 GN=SAMN05444123_10714 PE=3 SV=1	6.10745	0.0120218
tr|A0A318TGE3|A0A318TGE3_9BRAD	9BRAD	2	2-octaprenyl-3-methyl-6-methoxy-1,4-benzoquinol hydroxylase OS=Rhodopseudomonas faecalis OX=99655 GN=BJ122_10533 PE=3 SV=1	0.391279	0.209891
tr|A0A318TKJ8|A0A318TKJ8_9BRAD	9BRAD	1	2-octaprenyl-6-methoxyphenol hydroxylase /2-octaprenyl-3-methyl-6-methoxy-1,4-benzoquinol hydroxylase OS=Rhodopseudomonas faecalis OX=99655 GN=BJ122_11277 PE=3 SV=1	0.58731	0.33806
tr|A0A318TCR5|A0A318TCR5_9BRAD	9BRAD	1	2-octaprenylphenol hydroxylase OS=Rhodopseudomonas faecalis OX=99655 GN=BJ122_11212 PE=4 SV=1	0.940743	0.915253
tr|A0A318TI19|A0A318TI19_9BRAD	9BRAD	3	2-oxoglutarate ferredoxin oxidoreductase alpha subunit OS=Rhodopseudomonas faecalis OX=99655 GN=BJ122_10329 PE=4 SV=1	1.91495	0.0267281
tr|A0A318TMY2|A0A318TMY2_9BRAD	9BRAD	1	2-oxoglutarate ferredoxin oxidoreductase subunit gamma OS=Rhodopseudomonas faecalis OX=99655 GN=BJ122_10331 PE=4 SV=1	0.146729	0.200391
tr|A0A318TBK3|A0A318TBK3_9BRAD	9BRAD	4	30S ribosomal protein S1 OS=Rhodopseudomonas faecalis OX=99655 GN=BJ122_11230 PE=3 SV=1	2.7936	0.00824401
tr|A0A318T8Y8|A0A318T8Y8_9BRAD	9BRAD	3	30S ribosomal protein S11 OS=Rhodopseudomonas faecalis OX=99655 GN=rpsK PE=3 SV=1	2.33112	0.0214844
tr|A0A318TAH9|A0A318TAH9_9BRAD	9BRAD	3	30S ribosomal protein S13 OS=Rhodopseudomonas faecalis OX=99655 GN=rpsM PE=3 SV=1	1.94432	0.020661
tr|A0A318TCE2|A0A318TCE2_9BRAD	9BRAD	1	30S ribosomal protein S15 OS=Rhodopseudomonas faecalis OX=99655 GN=rpsO PE=3 SV=1	5.25609	0.000589561
tr|A0A318TAJ2|A0A318TAJ2_9BRAD	9BRAD	2	30S ribosomal protein S16 OS=Rhodopseudomonas faecalis OX=99655 GN=rpsP PE=3 SV=1	1.28966	0.255281
tr|A0A318TAD8|A0A318TAD8_9BRAD	9BRAD	1	30S ribosomal protein S17 OS=Rhodopseudomonas faecalis OX=99655 GN=rpsQ PE=3 SV=1	2.10416	0.0191274
tr|A0A318T9A5|A0A318T9A5_9BRAD	9BRAD	1	30S ribosomal protein S19 OS=Rhodopseudomonas faecalis OX=99655 GN=rpsS PE=3 SV=1	2.11189	0.00357864
tr|A0A318U0M4|A0A318U0M4_9BRAD	9BRAD	5	30S ribosomal protein S2 OS=Rhodopseudomonas faecalis OX=99655 GN=rpsB PE=3 SV=1	2.5268	0.000260497
tr|A0A318TN51|A0A318TN51_9BRAD	9BRAD	2	30S ribosomal protein S20 OS=Rhodopseudomonas faecalis OX=99655 GN=rpsT PE=3 SV=1	3.66039	0.00160017
tr|A0A0N1C4N5|A0A0N1C4N5_9BRAD	9BRAD	1	30S ribosomal protein S21 OS=Rhodopseudomonas sp. AAP120 OX=1523430 GN=rpsU PE=3 SV=1	1.85034	0.0280231
tr|A0A318TPS2|A0A318TPS2_9BRAD	9BRAD	2	30S ribosomal protein S3 OS=Rhodopseudomonas faecalis OX=99655 GN=rpsC PE=3 SV=1	2.19511	0.0398987
tr|A0A318TLN4|A0A318TLN4_9BRAD	9BRAD	2	30S ribosomal protein S4 OS=Rhodopseudomonas faecalis OX=99655 GN=rpsD PE=3 SV=1	1.55369	0.210023
tr|A0A318THV6|A0A318THV6_9BRAD	9BRAD	7	30S ribosomal protein S6 OS=Rhodopseudomonas faecalis OX=99655 GN=rpsF PE=3 SV=1	1.54186	0.0522092
tr|A0A318TCT3|A0A318TCT3_9BRAD	9BRAD	3	30S ribosomal protein S7 OS=Rhodopseudomonas faecalis OX=99655 GN=rpsG PE=3 SV=1	1.16345	0.540463
tr|A0A318TL74|A0A318TL74_9BRAD	9BRAD	4	30S ribosomal protein S9 OS=Rhodopseudomonas faecalis OX=99655 GN=rpsI PE=3 SV=1	2.10782	0.0167298
tr|A0A318U0N5|A0A318U0N5_9BRAD	9BRAD	1	3-hydroxyacyl-[acyl-carrier-protein] dehydratase FabZ OS=Rhodopseudomonas faecalis OX=99655 GN=fabZ PE=3 SV=1	0.339989	0.393813
tr|A0A318TBD8|A0A318TBD8_9BRAD	9BRAD	1	3-hydroxyacyl-CoA dehydrogenase OS=Rhodopseudomonas faecalis OX=99655 GN=BJ122_12830 PE=3 SV=1	0.199313	0.226744
tr|A0A318T822|A0A318T822_9BRAD	9BRAD	1	3-hydroxydecanoyl-[acyl-carrier-protein] dehydratase OS=Rhodopseudomonas faecalis OX=99655 GN=fabA PE=3 SV=1	0.952285	0.914487
tr|A0A318TC20|A0A318TC20_9BRAD	9BRAD	6	3-isopropylmalate dehydratase large subunit OS=Rhodopseudomonas faecalis OX=99655 GN=leuC PE=3 SV=1	1.25274	0.291106
tr|A0A318TE73|A0A318TE73_9BRAD	9BRAD	2	3-isopropylmalate dehydratase small subunit OS=Rhodopseudomonas faecalis OX=99655 GN=leuD PE=3 SV=1	0.742248	0.231326
tr|A0A318TBA6|A0A318TBA6_9BRAD	9BRAD	3	3-isopropylmalate dehydrogenase OS=Rhodopseudomonas faecalis OX=99655 GN=leuB PE=3 SV=1	1.44137	0.022769
tr|A0A318TFT1|A0A318TFT1_9BRAD	9BRAD	2	3-methylcrotonyl-CoA carboxylase alpha subunit OS=Rhodopseudomonas faecalis OX=99655 GN=BJ122_1063 PE=4 SV=1	0.406246	0.301355
tr|A0A318TNQ3|A0A318TNQ3_9BRAD	9BRAD	2	3-methylcrotonyl-CoA carboxylase beta subunit OS=Rhodopseudomonas faecalis OX=99655 GN=BJ122_1064 PE=4 SV=1	1.0136	0.92502
tr|A0A318TD63|A0A318TD63_9BRAD	9BRAD	2	3-oxoacid CoA-transferase subunit A OS=Rhodopseudomonas faecalis OX=99655 GN=BJ122_11166 PE=4 SV=1	1.30393	0.310397
tr|A0A318TL49|A0A318TL49_9BRAD	9BRAD	2	3-oxoacid CoA-transferase subunit B OS=Rhodopseudomonas faecalis OX=99655 GN=BJ122_11165 PE=3 SV=1	0.632714	0.135275
tr|A0A318T932|A0A318T932_9BRAD	9BRAD	1	3-oxoacyl-[acyl-carrier protein] reductase OS=Rhodopseudomonas faecalis OX=99655 GN=BJ122_12527 PE=4 SV=1	1.14352	0.645997
tr|A0A318TFQ3|A0A318TFQ3_9BRAD	9BRAD	2	3-oxoacyl-[acyl-carrier-protein] reductase OS=Rhodopseudomonas faecalis OX=99655 GN=BJ122_107117 PE=3 SV=1	0.455775	0.339625
tr|A0A318TNE2|A0A318TNE2_9BRAD	9BRAD	1	3-oxoacyl-[acyl-carrier-protein] synthase 2 OS=Rhodopseudomonas faecalis OX=99655 GN=BJ122_107119 PE=3 SV=1	0.506142	0.205048
tr|A0A318TIW3|A0A318TIW3_9BRAD	9BRAD	3	3-oxoacyl-[acyl-carrier-protein] synthase 3 OS=Rhodopseudomonas faecalis OX=99655 GN=fabH PE=3 SV=1	0.557046	0.000508677
tr|A0A318T9K1|A0A318T9K1_9BRAD	9BRAD	3	3-oxoacyl-[acyl-carrier-protein] synthase I OS=Rhodopseudomonas faecalis OX=99655 GN=BJ122_12436 PE=3 SV=1	1.48494	0.138981
tr|A0A318TML2|A0A318TML2_9BRAD	9BRAD	1	3-oxoacyl-[acyl-carrier-protein] synthase II OS=Rhodopseudomonas faecalis OX=99655 GN=BJ122_102326 PE=3 SV=1	1.86297	0.00979014
tr|A0A318TSJ7|A0A318TSJ7_9BRAD	9BRAD	4	3-phenylpropionate/trans-cinnamate dioxygenase ferredoxin reductase subunit OS=Rhodopseudomonas faecalis OX=99655 GN=BJ122_10240 PE=4 SV=1	0.876976	0.341795
tr|A0A318T8V5|A0A318T8V5_9BRAD	9BRAD	3	4-hydroxy-3-methylbut-2-en-1-yl diphosphate synthase (flavodoxin) OS=Rhodopseudomonas faecalis OX=99655 GN=ispG PE=3 SV=1	0.691714	0.235273
tr|A0A318TA54|A0A318TA54_9BRAD	9BRAD	1	4-hydroxy-3-methylbut-2-enyl diphosphate reductase OS=Rhodopseudomonas faecalis OX=99655 GN=ispH PE=3 SV=1	0.37469	0.0119286
tr|A0A318TJU8|A0A318TJU8_9BRAD	9BRAD	1	4-hydroxy-tetrahydrodipicolinate reductase OS=Rhodopseudomonas faecalis OX=99655 GN=dapB PE=3 SV=1	1.92649	0.017799
tr|A0A318TGF1|A0A318TGF1_9BRAD	9BRAD	5	4-hydroxy-tetrahydrodipicolinate synthase OS=Rhodopseudomonas faecalis OX=99655 GN=dapA PE=3 SV=1	0.801633	0.347701
tr|A0A318TPU3|A0A318TPU3_9BRAD	9BRAD	3	50S ribosomal protein L1 OS=Rhodopseudomonas faecalis OX=99655 GN=rplA PE=3 SV=1	1.56457	0.0459439
tr|A0A318TEP0|A0A318TEP0_9BRAD	9BRAD	2	50S ribosomal protein L10 OS=Rhodopseudomonas faecalis OX=99655 GN=rplJ PE=3 SV=1	3.53614	0.00182586
tr|A0A318TCU3|A0A318TCU3_9BRAD	9BRAD	1	50S ribosomal protein L11 OS=Rhodopseudomonas faecalis OX=99655 GN=rplK PE=3 SV=1	1.90606	0.000726042
tr|A0A318TJ08|A0A318TJ08_9BRAD	9BRAD	3	50S ribosomal protein L13 OS=Rhodopseudomonas faecalis OX=99655 GN=rplM PE=3 SV=1	1.3499	0.150912
tr|A0A318TIH5|A0A318TIH5_9BRAD	9BRAD	2	50S ribosomal protein L14 OS=Rhodopseudomonas faecalis OX=99655 GN=rplN PE=3 SV=1	1.25399	0.212567
tr|A0A318TAC7|A0A318TAC7_9BRAD	9BRAD	6	50S ribosomal protein L15 OS=Rhodopseudomonas faecalis OX=99655 GN=rplO PE=3 SV=1	1.67617	0.0767268
tr|A0A318TEL7|A0A318TEL7_9BRAD	9BRAD	3	50S ribosomal protein L16 OS=Rhodopseudomonas faecalis OX=99655 GN=rplP PE=3 SV=1	2.34983	0.0411137
tr|A0A318TCQ3|A0A318TCQ3_9BRAD	9BRAD	2	50S ribosomal protein L17 OS=Rhodopseudomonas faecalis OX=99655 GN=rplQ PE=3 SV=1	3.0173	0.0199892
tr|A0A318TPR3|A0A318TPR3_9BRAD	9BRAD	3	50S ribosomal protein L18 OS=Rhodopseudomonas faecalis OX=99655 GN=rplR PE=3 SV=1	1.98022	0.0612408
tr|A0A318TJT9|A0A318TJT9_9BRAD	9BRAD	1	50S ribosomal protein L19 OS=Rhodopseudomonas faecalis OX=99655 GN=rplS PE=3 SV=1	1.66352	0.00813879
tr|A0A318T909|A0A318T909_9BRAD	9BRAD	3	50S ribosomal protein L2 OS=Rhodopseudomonas faecalis OX=99655 GN=rplB PE=3 SV=1	2.20575	0.00252787
tr|A0A318TR50|A0A318TR50_9BRAD	9BRAD	3	50S ribosomal protein L20 OS=Rhodopseudomonas faecalis OX=99655 GN=rplT PE=3 SV=1	2.46804	0.0112628
tr|A0A318T9L8|A0A318T9L8_9BRAD	9BRAD	4	50S ribosomal protein L21 OS=Rhodopseudomonas faecalis OX=99655 GN=rplU PE=3 SV=1	1.54886	0.166029
tr|A0A318TCS1|A0A318TCS1_9BRAD	9BRAD	1	50S ribosomal protein L22 OS=Rhodopseudomonas faecalis OX=99655 GN=rplV PE=3 SV=1	3.59376	0.0127827
tr|A0A318TAK3|A0A318TAK3_9BRAD	9BRAD	1	50S ribosomal protein L23 OS=Rhodopseudomonas faecalis OX=99655 GN=rplW PE=3 SV=1	1.57063	0.103149
tr|A0A318TA80|A0A318TA80_9BRAD	9BRAD	3	50S ribosomal protein L24 OS=Rhodopseudomonas faecalis OX=99655 GN=rplX PE=3 SV=1	2.82839	0.0169309
tr|A0A318TCP8|A0A318TCP8_9BRAD	9BRAD	9	50S ribosomal protein L25 OS=Rhodopseudomonas faecalis OX=99655 GN=rplY PE=3 SV=1	2.03366	0.00965894
tr|A0A318THV9|A0A318THV9_9BRAD	9BRAD	3	50S ribosomal protein L27 OS=Rhodopseudomonas faecalis OX=99655 GN=rpmA PE=3 SV=1	1.68937	0.135442
tr|A0A318T941|A0A318T941_9BRAD	9BRAD	3	50S ribosomal protein L28 OS=Rhodopseudomonas faecalis OX=99655 GN=rpmB PE=3 SV=1	2.2977	0.0391599
tr|A0A318TCT5|A0A318TCT5_9BRAD	9BRAD	2	50S ribosomal protein L29 OS=Rhodopseudomonas faecalis OX=99655 GN=rpmC PE=3 SV=1	1.56524	0.0467897
tr|A0A318TII5|A0A318TII5_9BRAD	9BRAD	3	50S ribosomal protein L3 OS=Rhodopseudomonas faecalis OX=99655 GN=rplC PE=3 SV=1	3.42738	0.000286903
tr|A0A318TCS5|A0A318TCS5_9BRAD	9BRAD	2	50S ribosomal protein L30 OS=Rhodopseudomonas faecalis OX=99655 GN=rpmD PE=3 SV=1	1.16527	0.482633
tr|A0A318TIS1|A0A318TIS1_9BRAD	9BRAD	3	50S ribosomal protein L31 OS=Rhodopseudomonas faecalis OX=99655 GN=rpmE PE=3 SV=1	0.763029	0.181825
tr|A0A318TCF4|A0A318TCF4_9BRAD	9BRAD	1	50S ribosomal protein L32 OS=Rhodopseudomonas faecalis OX=99655 GN=rpmF PE=3 SV=1	0.771973	0.571926
tr|A0A318TFK8|A0A318TFK8_9BRAD	9BRAD	2	50S ribosomal protein L33 OS=Rhodopseudomonas faecalis OX=99655 GN=rpmG PE=3 SV=1	0.715155	0.675747
tr|A0A318TA93|A0A318TA93_9BRAD	9BRAD	2	50S ribosomal protein L4 OS=Rhodopseudomonas faecalis OX=99655 GN=rplD PE=3 SV=1	1.62085	0.159292
tr|A0A318TAJ1|A0A318TAJ1_9BRAD	9BRAD	2	50S ribosomal protein L5 OS=Rhodopseudomonas faecalis OX=99655 GN=rplE PE=3 SV=1	2.47586	0.00443543
tr|A0A318TCR3|A0A318TCR3_9BRAD	9BRAD	3	50S ribosomal protein L6 OS=Rhodopseudomonas faecalis OX=99655 GN=rplF PE=3 SV=1	2.25594	0.00302575
tr|A0A336JHF4|A0A336JHF4_9BRAD	9BRAD	2	50S ribosomal protein L6 OS=Rhodopseudomonas pentothenatexigens OX=999699 GN=rplF PE=3 SV=1	0.531047	0.218186
tr|A0A318TCV2|A0A318TCV2_9BRAD	9BRAD	4	50S ribosomal protein L7/L12 OS=Rhodopseudomonas faecalis OX=99655 GN=rplL PE=3 SV=1	0.598792	0.0709574
tr|A0A318THJ9|A0A318THJ9_9BRAD	9BRAD	5	50S ribosomal protein L9 OS=Rhodopseudomonas faecalis OX=99655 GN=rplI PE=3 SV=1	1.43168	0.0288729
tr|A0A318TUI1|A0A318TUI1_9BRAD	9BRAD	2	50S ribosomal subunit assembly factor BipA OS=Rhodopseudomonas faecalis OX=99655 GN=bipA PE=3 SV=1	0.96465	0.838791
tr|A0A318TU72|A0A318TU72_9BRAD	9BRAD	22	5-methyltetrahydropteroyltriglutamate--homocysteine methyltransferase OS=Rhodopseudomonas faecalis OX=99655 GN=metE PE=3 SV=1	2.75433	0.00191509
tr|A0A318TVV1|A0A318TVV1_9BRAD	9BRAD	1	6,7-dimethyl-8-ribityllumazine synthase OS=Rhodopseudomonas faecalis OX=99655 GN=ribH PE=3 SV=1	1.17859	0.775408
tr|A0A318TIB1|A0A318TIB1_9BRAD	9BRAD	6	60 kDa chaperonin OS=Rhodopseudomonas faecalis OX=99655 GN=groL PE=3 SV=1	2.24516	0.0371688
tr|A0A318TQK2|A0A318TQK2_9BRAD	9BRAD	3	60 kDa chaperonin OS=Rhodopseudomonas faecalis OX=99655 GN=groL PE=3 SV=1	2.41363	0.0223359
tr|A0A1H8VUG6|A0A1H8VUG6_9BRAD	9BRAD	1	60 kDa chaperonin OS=Rhodopseudomonas pseudopalustris OX=1513892 GN=groL PE=3 SV=1	2.13575	0.0453844
tr|A0A318TDH4|A0A318TDH4_9BRAD	9BRAD	1	Acetoin utilization deacetylase AcuC-like enzyme OS=Rhodopseudomonas faecalis OX=99655 GN=BJ122_11012 PE=3 SV=1	0.660572	0.162113
tr|A0A318T9I4|A0A318T9I4_9BRAD	9BRAD	5	Acetolactate synthase OS=Rhodopseudomonas faecalis OX=99655 GN=BJ122_1232 PE=3 SV=1	1.11452	0.650672
tr|A0A318TBZ1|A0A318TBZ1_9BRAD	9BRAD	7	Acetolactate synthase OS=Rhodopseudomonas faecalis OX=99655 GN=BJ122_1233 PE=3 SV=1	1.56357	0.0441288
tr|A0A318TI97|A0A318TI97_9BRAD	9BRAD	4	Acetyl-CoA C-acetyltransferase OS=Rhodopseudomonas faecalis OX=99655 GN=BJ122_103226 PE=3 SV=1	0.7803	0.149891
tr|A0A318TGV6|A0A318TGV6_9BRAD	9BRAD	4	Acetyl-CoA C-acetyltransferase OS=Rhodopseudomonas faecalis OX=99655 GN=BJ122_10832 PE=3 SV=1	0.555266	0.0749344
tr|A0A318TKH3|A0A318TKH3_9BRAD	9BRAD	3	Acetyl-CoA synthetase OS=Rhodopseudomonas faecalis OX=99655 GN=BJ122_101120 PE=4 SV=1	0.267744	0.0236448
tr|A0A318T7Y9|A0A318T7Y9_9BRAD	9BRAD	3	Acetyl-coenzyme A carboxylase carboxyl transferase subunit alpha OS=Rhodopseudomonas faecalis OX=99655 GN=accA PE=3 SV=1	1.41631	0.171465
tr|A0A318TJ62|A0A318TJ62_9BRAD	9BRAD	7	Acetyl-coenzyme A synthetase OS=Rhodopseudomonas faecalis OX=99655 GN=acsA PE=3 SV=1	1.39622	0.0412338
tr|A0A318TMT0|A0A318TMT0_9BRAD	9BRAD	3	Acetylglutamate kinase OS=Rhodopseudomonas faecalis OX=99655 GN=argB PE=3 SV=1	0.975637	0.929198
tr|A0A318T7D8|A0A318T7D8_9BRAD	9BRAD	3	Acetylornithine aminotransferase OS=Rhodopseudomonas faecalis OX=99655 GN=argD PE=3 SV=1	1.53557	0.25366
tr|A0A318U0S2|A0A318U0S2_9BRAD	9BRAD	1	Acetyltransferase component of pyruvate dehydrogenase complex OS=Rhodopseudomonas faecalis OX=99655 GN=BJ122_101262 PE=3 SV=1	0.175394	0.0640299
tr|A0A318TJS6|A0A318TJS6_9BRAD	9BRAD	6	Aconitate hydratase OS=Rhodopseudomonas faecalis OX=99655 GN=BJ122_11440 PE=3 SV=1	0.840404	0.285731
tr|A0A318TFG3|A0A318TFG3_9BRAD	9BRAD	1	Acyl carrier protein OS=Rhodopseudomonas faecalis OX=99655 GN=acpP PE=3 SV=1	2.00857	0.13952
tr|A0A318TB17|A0A318TB17_9BRAD	9BRAD	3	Acyl-CoA dehydrogenase OS=Rhodopseudomonas faecalis OX=99655 GN=BJ122_13210 PE=3 SV=1	0.63476	0.325401
tr|A0A318TNF5|A0A318TNF5_9BRAD	9BRAD	2	Acyl-CoA hydrolase OS=Rhodopseudomonas faecalis OX=99655 GN=BJ122_101149 PE=3 SV=1	1.55475	0.200967
tr|A0A318TDC2|A0A318TDC2_9BRAD	9BRAD	1	Acyl-CoA synthetase (AMP-forming)/AMP-acid ligase II OS=Rhodopseudomonas faecalis OX=99655 GN=BJ122_10911 PE=4 SV=1	0.454375	0.33165
tr|A0A318TGH0|A0A318TGH0_9BRAD	9BRAD	1	Acyl-CoA thioesterase FadM OS=Rhodopseudomonas faecalis OX=99655 GN=BJ122_106117 PE=4 SV=1	4.00271	0.00169012
tr|A0A318T8E0|A0A318T8E0_9BRAD	9BRAD	9	Adenosylhomocysteinase OS=Rhodopseudomonas faecalis OX=99655 GN=ahcY PE=3 SV=1	1.40383	0.0085743
tr|A0A318TA69|A0A318TA69_9BRAD	9BRAD	3	Adenylate kinase OS=Rhodopseudomonas faecalis OX=99655 GN=adk PE=3 SV=1	1.16604	0.5271
tr|A0A318TJH8|A0A318TJH8_9BRAD	9BRAD	2	Adenylosuccinate lyase OS=Rhodopseudomonas faecalis OX=99655 GN=BJ122_1029 PE=3 SV=1	0.437581	0.101345
tr|A0A318TJF3|A0A318TJF3_9BRAD	9BRAD	3	Adenylosuccinate synthetase OS=Rhodopseudomonas faecalis OX=99655 GN=purA PE=3 SV=1	0.917258	0.81732
tr|A0A318TJR7|A0A318TJR7_9BRAD	9BRAD	2	AhpD family alkylhydroperoxidase OS=Rhodopseudomonas faecalis OX=99655 GN=BJ122_10427 PE=4 SV=1	1.63546	0.0460361
tr|A0A318TZN1|A0A318TZN1_9BRAD	9BRAD	1	Alcohol dehydrogenase OS=Rhodopseudomonas faecalis OX=99655 GN=BJ122_102325 PE=4 SV=1	0.272715	0.324107
tr|A0A318TK87|A0A318TK87_9BRAD	9BRAD	3	Aldehyde dehydrogenase (NAD+) OS=Rhodopseudomonas faecalis OX=99655 GN=BJ122_10138 PE=4 SV=1	1.52352	0.226107
tr|A0A318TK42|A0A318TK42_9BRAD	9BRAD	5	Alkyl hydroperoxide reductase C OS=Rhodopseudomonas faecalis OX=99655 GN=BJ122_104157 PE=3 SV=1	1.21031	0.468886
tr|A0A318TG50|A0A318TG50_9BRAD	9BRAD	1	Alpha-ketoglutarate dehydrogenase OS=Rhodopseudomonas faecalis OX=99655 GN=BJ122_11423 PE=3 SV=1	2.49071	0.0218575
tr|A0A318TSS8|A0A318TSS8_9BRAD	9BRAD	1	Amidohydrolase OS=Rhodopseudomonas faecalis OX=99655 GN=BJ122_102131 PE=4 SV=1	0.267143	0.306804
tr|A0A318TLN8|A0A318TLN8_9BRAD	9BRAD	13	Amino acid ABC transporter substrate-binding protein (PAAT family) OS=Rhodopseudomonas faecalis OX=99655 GN=BJ122_101318 PE=3 SV=1	1.0145	0.884746
tr|A0A318T9Z2|A0A318T9Z2_9BRAD	9BRAD	1	Amino acid ABC transporter substrate-binding protein (PAAT family) OS=Rhodopseudomonas faecalis OX=99655 GN=BJ122_12248 PE=3 SV=1	0.57527	0.263568
tr|A0A318TL13|A0A318TL13_9BRAD	9BRAD	2	Amino acid/amide ABC transporter ATP-binding protein 1 (HAAT family) OS=Rhodopseudomonas faecalis OX=99655 GN=BJ122_103171 PE=4 SV=1	0.251728	0.0021217
tr|A0A318TNB7|A0A318TNB7_9BRAD	9BRAD	1	Amino acid/amide ABC transporter ATP-binding protein 2 (HAAT family) OS=Rhodopseudomonas faecalis OX=99655 GN=BJ122_103172 PE=3 SV=1	0.204178	0.354928
tr|A0A318TMK5|A0A318TMK5_9BRAD	9BRAD	1	Amino acid/amide ABC transporter ATP-binding protein 2 (HAAT family) OS=Rhodopseudomonas faecalis OX=99655 GN=BJ122_1374 PE=3 SV=1	0.442268	0.112431
tr|A0A318TYT5|A0A318TYT5_9BRAD	9BRAD	2	Amino acid/amide ABC transporter substrate-binding protein (HAAT family) OS=Rhodopseudomonas faecalis OX=99655 GN=BJ122_10214 PE=3 SV=1	0.996412	0.974187
tr|A0A318TYX3|A0A318TYX3_9BRAD	9BRAD	2	Amino acid/amide ABC transporter substrate-binding protein (HAAT family) OS=Rhodopseudomonas faecalis OX=99655 GN=BJ122_10254 PE=4 SV=1	0.988932	0.974227
tr|A0A318TIK0|A0A318TIK0_9BRAD	9BRAD	7	Amino acid/amide ABC transporter substrate-binding protein (HAAT family) OS=Rhodopseudomonas faecalis OX=99655 GN=BJ122_103168 PE=4 SV=1	1.57318	0.0769007
tr|A0A318TIY1|A0A318TIY1_9BRAD	9BRAD	6	Amino acid/amide ABC transporter substrate-binding protein (HAAT family) OS=Rhodopseudomonas faecalis OX=99655 GN=BJ122_10326 PE=3 SV=1	0.765649	0.0820162
tr|A0A318TGU2|A0A318TGU2_9BRAD	9BRAD	2	Amino acid/amide ABC transporter substrate-binding protein (HAAT family) OS=Rhodopseudomonas faecalis OX=99655 GN=BJ122_10812 PE=4 SV=1	0.442036	0.130352
tr|A0A318T9V8|A0A318T9V8_9BRAD	9BRAD	7	Amino acid/amide ABC transporter substrate-binding protein (HAAT family) OS=Rhodopseudomonas faecalis OX=99655 GN=BJ122_12272 PE=4 SV=1	1.48064	0.0626271
tr|A0A318T8Z8|A0A318T8Z8_9BRAD	9BRAD	5	Amino acid/amide ABC transporter substrate-binding protein (HAAT family) OS=Rhodopseudomonas faecalis OX=99655 GN=BJ122_12633 PE=4 SV=1	2.16041	0.00193484
tr|A0A318T788|A0A318T788_9BRAD	9BRAD	6	Amino acid/amide ABC transporter substrate-binding protein (HAAT family) OS=Rhodopseudomonas faecalis OX=99655 GN=BJ122_13317 PE=4 SV=1	0.898103	0.733199
tr|A0A318TAP6|A0A318TAP6_9BRAD	9BRAD	2	Amino acid/amide ABC transporter substrate-binding protein (HAAT family) OS=Rhodopseudomonas faecalis OX=99655 GN=BJ122_13715 PE=4 SV=1	1.01727	0.928069
tr|A0A318TAN8|A0A318TAN8_9BRAD	9BRAD	10	Amino acid/amide ABC transporter substrate-binding protein (HAAT family) OS=Rhodopseudomonas faecalis OX=99655 GN=BJ122_1375 PE=4 SV=1	1.39066	0.362531
tr|A0A318TF62|A0A318TF62_9BRAD	9BRAD	2	Aminotransferase OS=Rhodopseudomonas faecalis OX=99655 GN=BJ122_10632 PE=3 SV=1	0.657559	0.0248312
tr|A0A318TC38|A0A318TC38_9BRAD	9BRAD	5	Anaerobic Mg-protoporphyrin IX monomethyl ester oxidative cyclase OS=Rhodopseudomonas faecalis OX=99655 GN=BJ122_1119 PE=4 SV=1	1.52856	0.059355
tr|A0A318TLH8|A0A318TLH8_9BRAD	9BRAD	1	Anthranilate phosphoribosyltransferase OS=Rhodopseudomonas faecalis OX=99655 GN=trpD PE=3 SV=1	0.320123	0.113603
tr|A0A318TGW6|A0A318TGW6_9BRAD	9BRAD	1	Anthranilate synthase OS=Rhodopseudomonas faecalis OX=99655 GN=BJ122_104100 PE=4 SV=1	0.64829	0.255473
tr|A0A318TCI9|A0A318TCI9_9BRAD	9BRAD	2	Apolipoprotein A1/A4/E domain-containing protein OS=Rhodopseudomonas faecalis OX=99655 GN=BJ122_12023 PE=4 SV=1	1.42071	0.493961
tr|A0A318TNQ5|A0A318TNQ5_9BRAD	9BRAD	1	Arginine--tRNA ligase OS=Rhodopseudomonas faecalis OX=99655 GN=argS PE=3 SV=1	1.43838	0.293205
tr|A0A318T7P5|A0A318T7P5_9BRAD	9BRAD	1	Argininosuccinate lyase OS=Rhodopseudomonas faecalis OX=99655 GN=argH PE=3 SV=1	2.34412	0.00564052
tr|A0A318TA84|A0A318TA84_9BRAD	9BRAD	1	Argininosuccinate synthase OS=Rhodopseudomonas faecalis OX=99655 GN=argG PE=3 SV=1	0.582412	0.11734
tr|A0A318T765|A0A318T765_9BRAD	9BRAD	2	Aspartate aminotransferase OS=Rhodopseudomonas faecalis OX=99655 GN=BJ122_13122 PE=4 SV=1	0.86199	0.717717
tr|A0A318TBR9|A0A318TBR9_9BRAD	9BRAD	2	Aspartate-semialdehyde dehydrogenase OS=Rhodopseudomonas faecalis OX=99655 GN=asd PE=3 SV=1	0.853444	0.267049
tr|A0A318TEM7|A0A318TEM7_9BRAD	9BRAD	3	Aspartate--tRNA(Asp/Asn) ligase OS=Rhodopseudomonas faecalis OX=99655 GN=aspS PE=3 SV=1	0.567013	0.00223748
tr|A0A318T8P0|A0A318T8P0_9BRAD	9BRAD	3	Aspartokinase OS=Rhodopseudomonas faecalis OX=99655 GN=BJ122_12162 PE=3 SV=1	0.544623	0.0142711
tr|A0A318TJ07|A0A318TJ07_9BRAD	9BRAD	3	Aspartyl-tRNA(Asn)/glutamyl-tRNA(Gln) amidotransferase subunit A OS=Rhodopseudomonas faecalis OX=99655 GN=BJ122_10276 PE=3 SV=1	0.694958	0.0370966
tr|A0A318TN57|A0A318TN57_9BRAD	9BRAD	2	ATP phosphoribosyltransferase OS=Rhodopseudomonas faecalis OX=99655 GN=hisG PE=3 SV=1	0.646489	0.0506439
tr|A0A318TKU2|A0A318TKU2_9BRAD	9BRAD	1	ATP phosphoribosyltransferase regulatory subunit OS=Rhodopseudomonas faecalis OX=99655 GN=BJ122_103110 PE=4 SV=1	0.888178	0.732256
tr|A0A318T9D8|A0A318T9D8_9BRAD	9BRAD	2	ATP synthase epsilon chain OS=Rhodopseudomonas faecalis OX=99655 GN=atpC PE=3 SV=1	1.72886	0.118557
tr|A0A318T966|A0A318T966_9BRAD	9BRAD	6	ATP synthase gamma chain OS=Rhodopseudomonas faecalis OX=99655 GN=atpG PE=3 SV=1	1.60416	0.0583772
tr|A0A318T9I3|A0A318T9I3_9BRAD	9BRAD	6	ATP synthase subunit alpha OS=Rhodopseudomonas faecalis OX=99655 GN=atpA PE=3 SV=1	1.83026	0.0253245
tr|A0A318TDC7|A0A318TDC7_9BRAD	9BRAD	2	ATP synthase subunit b OS=Rhodopseudomonas faecalis OX=99655 GN=atpF PE=3 SV=1	0.344632	0.0895646
tr|A0A318THG8|A0A318THG8_9BRAD	9BRAD	8	ATP synthase subunit beta OS=Rhodopseudomonas faecalis OX=99655 GN=atpD PE=3 SV=1	2.06083	0.0818983
tr|A0A318THE5|A0A318THE5_9BRAD	9BRAD	1	ATP-dependent Clp protease ATP-binding subunit ClpA OS=Rhodopseudomonas faecalis OX=99655 GN=BJ122_10751 PE=3 SV=1	0.470041	0.303845
tr|A0A318TKZ0|A0A318TKZ0_9BRAD	9BRAD	5	ATP-dependent Clp protease ATP-binding subunit ClpX OS=Rhodopseudomonas faecalis OX=99655 GN=clpX PE=3 SV=1	0.623739	0.215665
tr|A0A318TU92|A0A318TU92_9BRAD	9BRAD	2	ATP-dependent Clp protease proteolytic subunit OS=Rhodopseudomonas faecalis OX=99655 GN=clpP PE=3 SV=1	0.99065	0.98263
tr|A0A318TF39|A0A318TF39_9BRAD	9BRAD	2	ATP-dependent protease ATPase subunit HslU OS=Rhodopseudomonas faecalis OX=99655 GN=hslU PE=3 SV=1	0.685861	0.205102
tr|A0A318TAK9|A0A318TAK9_9BRAD	9BRAD	1	ATP-dependent protease subunit HslV OS=Rhodopseudomonas faecalis OX=99655 GN=hslV PE=3 SV=1	0.330639	0.274246
tr|A0A318T7X4|A0A318T7X4_9BRAD	9BRAD	1	ATP-dependent RNA helicase SUPV3L1/SUV3 OS=Rhodopseudomonas faecalis OX=99655 GN=BJ122_12535 PE=4 SV=1	2.14796	0.0374225
tr|A0A318TIL2|A0A318TIL2_9BRAD	9BRAD	4	ATP-dependent zinc metalloprotease FtsH OS=Rhodopseudomonas faecalis OX=99655 GN=ftsH PE=3 SV=1	0.606178	0.0568104
tr|A0A318TKE8|A0A318TKE8_9BRAD	9BRAD	1	Bacterioferritin OS=Rhodopseudomonas faecalis OX=99655 GN=BJ122_102350 PE=3 SV=1	0.22319	0.246994
tr|A0A318T7H8|A0A318T7H8_9BRAD	9BRAD	2	Beta sliding clamp OS=Rhodopseudomonas faecalis OX=99655 GN=BJ122_1298 PE=3 SV=1	0.298505	0.000588878
tr|A0A318TR99|A0A318TR99_9BRAD	9BRAD	3	Beta-alanine--pyruvate transaminase OS=Rhodopseudomonas faecalis OX=99655 GN=BJ122_10388 PE=3 SV=1	0.678117	0.26037
tr|A0A318TL38|A0A318TL38_9BRAD	9BRAD	1	Beta-ketodecanoyl-[acyl-carrier-protein] synthase OS=Rhodopseudomonas faecalis OX=99655 GN=BJ122_103202 PE=4 SV=1	1.51652	0.0663229
tr|A0A318TQC0|A0A318TQC0_9BRAD	9BRAD	1	Bifunctional enzyme IspD/IspF OS=Rhodopseudomonas faecalis OX=99655 GN=ispDF PE=3 SV=1	0.210859	2.28371e-05
tr|A0A318TDG3|A0A318TDG3_9BRAD	9BRAD	3	Bifunctional protein FolD OS=Rhodopseudomonas faecalis OX=99655 GN=folD PE=3 SV=1	0.880147	0.696672
tr|A0A318T8L9|A0A318T8L9_9BRAD	9BRAD	5	Bifunctional purine biosynthesis protein PurH OS=Rhodopseudomonas faecalis OX=99655 GN=purH PE=3 SV=1	0.803616	0.337205
tr|A0A318TJ00|A0A318TJ00_9BRAD	9BRAD	1	Biopolymer transport protein ExbB OS=Rhodopseudomonas faecalis OX=99655 GN=BJ122_10346 PE=3 SV=1	0.224741	0.304509
tr|A0A318TFA0|A0A318TFA0_9BRAD	9BRAD	1	Biotin carboxyl carrier protein of acetyl-CoA carboxylase OS=Rhodopseudomonas faecalis OX=99655 GN=BJ122_10672 PE=4 SV=1	0.758976	0.289757
tr|A0A318TF40|A0A318TF40_9BRAD	9BRAD	1	Biotin carboxylase OS=Rhodopseudomonas faecalis OX=99655 GN=BJ122_10673 PE=4 SV=1	0.715779	0.0945582
tr|A0A318TCP3|A0A318TCP3_9BRAD	9BRAD	1	Branched-chain-amino-acid aminotransferase OS=Rhodopseudomonas faecalis OX=99655 GN=BJ122_12073 PE=3 SV=1	0.401819	0.0821031
tr|A0A318TKC9|A0A318TKC9_9BRAD	9BRAD	12	C4-dicarboxylate-binding protein DctP OS=Rhodopseudomonas faecalis OX=99655 GN=BJ122_1018 PE=3 SV=1	1.3915	0.021344
tr|A0A318TL28|A0A318TL28_9BRAD	9BRAD	1	Carbamoyl-phosphate synthase large chain OS=Rhodopseudomonas faecalis OX=99655 GN=carB PE=3 SV=1	0.370323	0.00450174
tr|A0A318TEW9|A0A318TEW9_9BRAD	9BRAD	2	Carbohydrate ABC transporter substrate-binding protein (CUT1 family) OS=Rhodopseudomonas faecalis OX=99655 GN=BJ122_11238 PE=3 SV=1	0.572036	0.314366
tr|A0A318TTZ2|A0A318TTZ2_9BRAD	9BRAD	1	Carbonic anhydrase/acetyltransferase-like protein (Isoleucine patch superfamily) OS=Rhodopseudomonas faecalis OX=99655 GN=BJ122_10173 PE=4 SV=1	1.78919	0.000250288
tr|A0A318T8A2|A0A318T8A2_9BRAD	9BRAD	1	Carbon-monoxide dehydrogenase medium subunit OS=Rhodopseudomonas faecalis OX=99655 GN=BJ122_13621 PE=4 SV=1	0.269992	0.113713
tr|A0A318T729|A0A318T729_9BRAD	9BRAD	2	Carbon-monoxide dehydrogenase small subunit OS=Rhodopseudomonas faecalis OX=99655 GN=BJ122_13619 PE=4 SV=1	0.898407	0.621813
tr|A0A318THI8|A0A318THI8_9BRAD	9BRAD	6	Catalase-peroxidase OS=Rhodopseudomonas faecalis OX=99655 GN=katG PE=3 SV=1	0.908872	0.644208
tr|A0A318TA91|A0A318TA91_9BRAD	9BRAD	1	CBS domain protein OS=Rhodopseudomonas faecalis OX=99655 GN=BJ122_11562 PE=4 SV=1	2.85749	0.0315349
tr|A0A318T9R0|A0A318T9R0_9BRAD	9BRAD	1	Cell division protein FtsZ OS=Rhodopseudomonas faecalis OX=99655 GN=ftsZ PE=3 SV=1	1.56649	0.223271
tr|A0A318TC87|A0A318TC87_9BRAD	9BRAD	6	Chaperone protein ClpB OS=Rhodopseudomonas faecalis OX=99655 GN=clpB PE=3 SV=1	0.974043	0.836549
tr|A0A318TE80|A0A318TE80_9BRAD	9BRAD	1	Chaperone protein DnaJ OS=Rhodopseudomonas faecalis OX=99655 GN=dnaJ PE=3 SV=1	1.79692	0.175894
tr|A0A318TB09|A0A318TB09_9BRAD	9BRAD	2	Chaperone protein DnaK OS=Rhodopseudomonas faecalis OX=99655 GN=dnaK PE=2 SV=1	2.02643	0.00745165
tr|A0A318T840|A0A318T840_9BRAD	9BRAD	1	Chaperone protein HtpG OS=Rhodopseudomonas faecalis OX=99655 GN=htpG PE=3 SV=1	0.601726	0.332411
tr|A0A318TFZ6|A0A318TFZ6_9BRAD	9BRAD	3	Chlorophyllide reductase iron protein subunit X OS=Rhodopseudomonas faecalis OX=99655 GN=BJ122_110114 PE=3 SV=1	1.30893	0.109856
tr|A0A318TI74|A0A318TI74_9BRAD	9BRAD	1	Chlorophyllide reductase subunit Y OS=Rhodopseudomonas faecalis OX=99655 GN=BJ122_110115 PE=4 SV=1	2.58325	0.0534677
tr|A0A318TC70|A0A318TC70_9BRAD	9BRAD	1	Chromosome partitioning protein OS=Rhodopseudomonas faecalis OX=99655 GN=BJ122_11139 PE=4 SV=1	0.109178	0.0118479
tr|A0A318TBQ4|A0A318TBQ4_9BRAD	9BRAD	1	Chromosome segregation DNA-binding protein OS=Rhodopseudomonas faecalis OX=99655 GN=BJ122_11293 PE=3 SV=1	1.10659	0.796784
tr|A0A318TAK8|A0A318TAK8_9BRAD	9BRAD	4	Citrate lyase subunit beta/citryl-CoA lyase OS=Rhodopseudomonas faecalis OX=99655 GN=BJ122_11468 PE=3 SV=1	0.693406	0.163716
tr|A0A318TB74|A0A318TB74_9BRAD	9BRAD	1	Citronellol/citronellal dehydrogenase OS=Rhodopseudomonas faecalis OX=99655 GN=BJ122_12927 PE=4 SV=1	0.34365	0.166742
tr|A0A318TD83|A0A318TD83_9BRAD	9BRAD	2	Cobaltochelatase CobS subunit OS=Rhodopseudomonas faecalis OX=99655 GN=BJ122_12541 PE=4 SV=1	0.526082	0.0725202
tr|A0A318TGG6|A0A318TGG6_9BRAD	9BRAD	1	Cobyric acid synthase OS=Rhodopseudomonas faecalis OX=99655 GN=cobQ PE=3 SV=1	1.55341	0.0115401
tr|A0A318TD79|A0A318TD79_9BRAD	9BRAD	2	Collagen triple helix repeat protein OS=Rhodopseudomonas faecalis OX=99655 GN=BJ122_1173 PE=4 SV=1	0.940106	0.835803
tr|A0A318TD64|A0A318TD64_9BRAD	9BRAD	4	Coproporphyrinogen-III oxidase OS=Rhodopseudomonas faecalis OX=99655 GN=BJ122_11111 PE=3 SV=1	0.697146	0.315543
tr|A0A318TND8|A0A318TND8_9BRAD	9BRAD	1	CreA protein OS=Rhodopseudomonas faecalis OX=99655 GN=BJ122_101129 PE=4 SV=1	0.975638	0.837935
tr|A0A318T9R4|A0A318T9R4_9BRAD	9BRAD	1	CRISPR-associated Csd1 family protein OS=Rhodopseudomonas faecalis OX=99655 GN=BJ122_12220 PE=4 SV=1	0.264975	0.0501625
tr|A0A318TC69|A0A318TC69_9BRAD	9BRAD	5	CRISPR-associated Csd2 family protein OS=Rhodopseudomonas faecalis OX=99655 GN=BJ122_12221 PE=4 SV=1	0.960991	0.893856
tr|A0A318TCV3|A0A318TCV3_9BRAD	9BRAD	1	CubicO group peptidase (Beta-lactamase class C family) OS=Rhodopseudomonas faecalis OX=99655 GN=BJ122_11954 PE=4 SV=1	0.0900918	0.0728836
tr|A0A318TE38|A0A318TE38_9BRAD	9BRAD	8	CubicO group peptidase (Beta-lactamase class C family) OS=Rhodopseudomonas faecalis OX=99655 GN=BJ122_1216 PE=4 SV=1	0.884893	0.542321
tr|A0A318U048|A0A318U048_9BRAD	9BRAD	1	Cystathionine gamma-lyase OS=Rhodopseudomonas faecalis OX=99655 GN=BJ122_10116 PE=3 SV=1	0.488679	0.262659
tr|A0A318TAI3|A0A318TAI3_9BRAD	9BRAD	2	Cysteine synthase OS=Rhodopseudomonas faecalis OX=99655 GN=BJ122_11960 PE=3 SV=1	0.877445	0.775941
tr|A0A318TJN8|A0A318TJN8_9BRAD	9BRAD	1	Cysteine--tRNA ligase OS=Rhodopseudomonas faecalis OX=99655 GN=cysS PE=3 SV=1	0.459802	0.327297
tr|A0A318T9W3|A0A318T9W3_9BRAD	9BRAD	7	Cytochrome-dependent sulfide dehydrogenase (Flavoprotein) OS=Rhodopseudomonas faecalis OX=99655 GN=BJ122_11654 PE=4 SV=1	2.68442	0.0342755
tr|A0A318TJE5|A0A318TJE5_9BRAD	9BRAD	5	D-3-phosphoglycerate dehydrogenase OS=Rhodopseudomonas faecalis OX=99655 GN=BJ122_11514 PE=3 SV=1	1.02508	0.913945
tr|A0A318TPG9|A0A318TPG9_9BRAD	9BRAD	7	Delta-aminolevulinic acid dehydratase OS=Rhodopseudomonas faecalis OX=99655 GN=BJ122_10562 PE=3 SV=1	1.39884	0.0949831
tr|A0A318TBQ9|A0A318TBQ9_9BRAD	9BRAD	1	Dihydrolipoyl dehydrogenase OS=Rhodopseudomonas faecalis OX=99655 GN=BJ122_11419 PE=3 SV=1	0.420808	0.248151
tr|A0A318TE82|A0A318TE82_9BRAD	9BRAD	3	Dihydrolipoyllysine-residue succinyltransferase component of 2-oxoglutarate dehydrogenase complex OS=Rhodopseudomonas faecalis OX=99655 GN=BJ122_11422 PE=3 SV=1	1.37644	0.362833
tr|A0A318THZ8|A0A318THZ8_9BRAD	9BRAD	1	Dihydroorotase OS=Rhodopseudomonas faecalis OX=99655 GN=BJ122_10451 PE=3 SV=1	1.41871	0.447747
tr|A0A318TQ41|A0A318TQ41_9BRAD	9BRAD	1	Dihydroxy-acid dehydratase OS=Rhodopseudomonas faecalis OX=99655 GN=ilvD PE=3 SV=1	2.01193	0.188013
tr|A0A318TG34|A0A318TG34_9BRAD	9BRAD	2	D-methionine transport system substrate-binding protein OS=Rhodopseudomonas faecalis OX=99655 GN=BJ122_105149 PE=3 SV=1	1.11767	0.659522
tr|A0A318TNI3|A0A318TNI3_9BRAD	9BRAD	2	DNA-binding protein HU-beta OS=Rhodopseudomonas faecalis OX=99655 GN=BJ122_101182 PE=3 SV=1	2.8991	0.0192374
tr|A0A318T985|A0A318T985_9BRAD	9BRAD	2	DNA-directed RNA polymerase subunit alpha OS=Rhodopseudomonas faecalis OX=99655 GN=rpoA PE=3 SV=1	2.46164	0.000396977
tr|A0A318TAF9|A0A318TAF9_9BRAD	9BRAD	18	DNA-directed RNA polymerase subunit beta OS=Rhodopseudomonas faecalis OX=99655 GN=rpoB PE=3 SV=1	1.20968	0.223028
tr|A0A318TIJ5|A0A318TIJ5_9BRAD	9BRAD	13	DNA-directed RNA polymerase subunit beta' OS=Rhodopseudomonas faecalis OX=99655 GN=rpoC PE=3 SV=1	1.07765	0.65249
tr|A0A318TIX4|A0A318TIX4_9BRAD	9BRAD	2	DNA-directed RNA polymerase subunit omega OS=Rhodopseudomonas faecalis OX=99655 GN=rpoZ PE=3 SV=1	1.74264	0.0788813
tr|A0A318TCL3|A0A318TCL3_9BRAD	9BRAD	2	dTDP-4-amino-4,6-dideoxygalactose transaminase OS=Rhodopseudomonas faecalis OX=99655 GN=BJ122_12043 PE=3 SV=1	1.50681	0.0605649
tr|A0A318TKA6|A0A318TKA6_9BRAD	9BRAD	5	DUF2059 domain-containing protein OS=Rhodopseudomonas faecalis OX=99655 GN=BJ122_102300 PE=4 SV=1	1.51824	0.379599
tr|A0A318TJU4|A0A318TJU4_9BRAD	9BRAD	1	DUF853 domain-containing protein OS=Rhodopseudomonas faecalis OX=99655 GN=BJ122_102130 PE=4 SV=1	0.416326	0.0975582
tr|A0A318TEB0|A0A318TEB0_9BRAD	9BRAD	1	Effector-binding domain-containing protein OS=Rhodopseudomonas faecalis OX=99655 GN=BJ122_11452 PE=4 SV=1	1.29841	0.346214
tr|A0A318T8U6|A0A318T8U6_9BRAD	9BRAD	4	Electron transfer flavoprotein alpha subunit apoprotein OS=Rhodopseudomonas faecalis OX=99655 GN=BJ122_12829 PE=3 SV=1	2.43541	0.0081615
tr|A0A318TGZ8|A0A318TGZ8_9BRAD	9BRAD	8	Electron transfer flavoprotein beta subunit OS=Rhodopseudomonas faecalis OX=99655 GN=BJ122_12828 PE=3 SV=1	1.42063	0.238517
tr|A0A318TGV4|A0A318TGV4_9BRAD	9BRAD	3	Electron transfer flavoprotein-ubiquinone oxidoreductase OS=Rhodopseudomonas faecalis OX=99655 GN=BJ122_10479 PE=4 SV=1	1.20608	0.303748
tr|A0A318TGQ5|A0A318TGQ5_9BRAD	9BRAD	5	Elongation factor G OS=Rhodopseudomonas faecalis OX=99655 GN=BJ122_13125 PE=3 SV=1	0.973065	0.875901
tr|A0A318TPT2|A0A318TPT2_9BRAD	9BRAD	12	Elongation factor G OS=Rhodopseudomonas faecalis OX=99655 GN=fusA PE=3 SV=1	1.54968	0.00686207
tr|A0A318TEY1|A0A318TEY1_9BRAD	9BRAD	4	Elongation factor P OS=Rhodopseudomonas faecalis OX=99655 GN=efp PE=3 SV=1	1.83232	0.00717111
tr|A0A318TNL6|A0A318TNL6_9BRAD	9BRAD	9	Elongation factor Ts OS=Rhodopseudomonas faecalis OX=99655 GN=tsf PE=3 SV=1	2.06909	0.0103844
tr|A0A318TPV2|A0A318TPV2_9BRAD	9BRAD	6	Elongation factor Tu OS=Rhodopseudomonas faecalis OX=99655 GN=tuf PE=3 SV=1	2.29837	0.00362699
tr|A0A318THF6|A0A318THF6_9BRAD	9BRAD	1	Enamine deaminase RidA (YjgF/YER057c/UK114 family) OS=Rhodopseudomonas faecalis OX=99655 GN=BJ122_10761 PE=4 SV=1	0.32553	0.0782695
tr|A0A318TMB0|A0A318TMB0_9BRAD	9BRAD	1	Enamine deaminase RidA (YjgF/YER057c/UK114 family) OS=Rhodopseudomonas faecalis OX=99655 GN=BJ122_109127 PE=4 SV=1	1.70096	0.137099
tr|A0A318TMM2|A0A318TMM2_9BRAD	9BRAD	6	Energy-dependent translational throttle protein EttA OS=Rhodopseudomonas faecalis OX=99655 GN=ettA PE=3 SV=1	0.601694	0.162376
tr|A0A318T986|A0A318T986_9BRAD	9BRAD	2	Enoyl-[acyl-carrier-protein] reductase [NADH] OS=Rhodopseudomonas faecalis OX=99655 GN=BJ122_12437 PE=3 SV=1	0.678303	0.415421
tr|A0A318U0E2|A0A318U0E2_9BRAD	9BRAD	1	Enoyl-CoA hydratase OS=Rhodopseudomonas faecalis OX=99655 GN=BJ122_101118 PE=4 SV=1	0.358287	0.0313302
tr|A0A318TSQ1|A0A318TSQ1_9BRAD	9BRAD	2	Enoyl-CoA hydratase OS=Rhodopseudomonas faecalis OX=99655 GN=BJ122_11015 PE=4 SV=1	0.931339	0.728923
tr|A0A318THD2|A0A318THD2_9BRAD	9BRAD	2	Enoyl-CoA hydratase/carnithine racemase OS=Rhodopseudomonas faecalis OX=99655 GN=BJ122_12528 PE=3 SV=1	0.934806	0.848145
tr|A0A318TI42|A0A318TI42_9BRAD	9BRAD	2	Farnesyl-diphosphate synthase OS=Rhodopseudomonas faecalis OX=99655 GN=BJ122_12145 PE=3 SV=1	0.761298	0.457394
tr|A0A318TXU0|A0A318TXU0_9BRAD	9BRAD	1	Fatty-acyl-CoA synthase OS=Rhodopseudomonas faecalis OX=99655 GN=BJ122_103122 PE=4 SV=1	1.16924	0.781793
tr|A0A318TQ38|A0A318TQ38_9BRAD	9BRAD	3	Fatty-acyl-CoA synthase OS=Rhodopseudomonas faecalis OX=99655 GN=BJ122_10422 PE=4 SV=1	0.789854	0.234451
tr|A0A318TPC0|A0A318TPC0_9BRAD	9BRAD	2	Fatty-acyl-CoA synthase OS=Rhodopseudomonas faecalis OX=99655 GN=BJ122_1217 PE=4 SV=1	0.893174	0.753204
tr|A0A318TBQ1|A0A318TBQ1_9BRAD	9BRAD	1	Ferredoxin OS=Rhodopseudomonas faecalis OX=99655 GN=BJ122_12533 PE=4 SV=1	0.642792	0.0124577
tr|A0A318TA59|A0A318TA59_9BRAD	9BRAD	1	Ferredoxin--NADP reductase OS=Rhodopseudomonas faecalis OX=99655 GN=BJ122_12019 PE=3 SV=1	1.25357	0.382839
tr|A0A318TSQ0|A0A318TSQ0_9BRAD	9BRAD	1	Ferritin-like metal-binding protein YciE OS=Rhodopseudomonas faecalis OX=99655 GN=BJ122_102100 PE=4 SV=1	3.76903	0.00511924
tr|A0A318T915|A0A318T915_9BRAD	9BRAD	1	Ferritin-like metal-binding protein YciE OS=Rhodopseudomonas faecalis OX=99655 GN=BJ122_12014 PE=4 SV=1	0.758438	0.6789
tr|A0A318TIC8|A0A318TIC8_9BRAD	9BRAD	1	Fe-S cluster assembly ATP-binding protein OS=Rhodopseudomonas faecalis OX=99655 GN=BJ122_10651 PE=3 SV=1	0.693687	0.0687039
tr|A0A318TPC7|A0A318TPC7_9BRAD	9BRAD	3	Fe-S cluster biogenesis protein NfuA OS=Rhodopseudomonas faecalis OX=99655 GN=BJ122_12119 PE=4 SV=1	1.85301	0.0229476
tr|A0A318T9A3|A0A318T9A3_9BRAD	9BRAD	2	Fis family two component transcriptional regulator OS=Rhodopseudomonas faecalis OX=99655 GN=BJ122_12457 PE=4 SV=1	2.66302	0.0190014
tr|A0A318TBE8|A0A318TBE8_9BRAD	9BRAD	1	Flagellin OS=Rhodopseudomonas faecalis OX=99655 GN=BJ122_1272 PE=3 SV=1	0.819716	0.300225
tr|A0A318TEC1|A0A318TEC1_9BRAD	9BRAD	8	Flagellin-like hook-associated protein FlgL (Fragment) OS=Rhodopseudomonas faecalis OX=99655 GN=BJ122_1201 PE=4 SV=1	0.737921	0.24486
tr|A0A318TGI6|A0A318TGI6_9BRAD	9BRAD	5	Fructose-1,6-bisphosphatase class 1 OS=Rhodopseudomonas faecalis OX=99655 GN=fbp PE=3 SV=1	0.537716	0.00351562
tr|A0A318TV31|A0A318TV31_9BRAD	9BRAD	3	Fructose-1,6-bisphosphatase OS=Rhodopseudomonas faecalis OX=99655 GN=BJ122_10630 PE=3 SV=1	0.98394	0.95565
tr|A0A318T8V3|A0A318T8V3_9BRAD	9BRAD	2	Fumarate hydratase class I OS=Rhodopseudomonas faecalis OX=99655 GN=BJ122_12737 PE=3 SV=1	0.847374	0.517017
tr|A0A318TM70|A0A318TM70_9BRAD	9BRAD	3	G3E family GTPase OS=Rhodopseudomonas faecalis OX=99655 GN=BJ122_102186 PE=3 SV=1	0.676447	0.192267
tr|A0A318TBV9|A0A318TBV9_9BRAD	9BRAD	1	Gamma-glutamyl phosphate reductase OS=Rhodopseudomonas faecalis OX=99655 GN=proA PE=3 SV=1	0.320333	0.398412
tr|A0A318TIJ1|A0A318TIJ1_9BRAD	9BRAD	1	Glucose-1-phosphate adenylyltransferase OS=Rhodopseudomonas faecalis OX=99655 GN=glgC PE=3 SV=1	0.543216	0.498616
tr|A0A318TIG4|A0A318TIG4_9BRAD	9BRAD	5	Glutamate dehydrogenase OS=Rhodopseudomonas faecalis OX=99655 GN=BJ122_103181 PE=3 SV=1	0.706412	0.0492627
tr|A0A318TIA8|A0A318TIA8_9BRAD	9BRAD	2	Glutamate synthase (NADH) large subunit OS=Rhodopseudomonas faecalis OX=99655 GN=BJ122_103236 PE=3 SV=1	0.649344	0.0419696
tr|A0A318TL61|A0A318TL61_9BRAD	9BRAD	6	Glutamate synthase (NADH) small subunit OS=Rhodopseudomonas faecalis OX=99655 GN=BJ122_103235 PE=4 SV=1	0.45664	0.0678558
tr|A0A318TLG0|A0A318TLG0_9BRAD	9BRAD	1	Glutamate--tRNA ligase OS=Rhodopseudomonas faecalis OX=99655 GN=gltX PE=3 SV=1	0.107149	0.100819
tr|A0A318TNH2|A0A318TNH2_9BRAD	9BRAD	10	Glutamine synthetase OS=Rhodopseudomonas faecalis OX=99655 GN=BJ122_101170 PE=3 SV=1	1.01277	0.911668
tr|A0A318THS6|A0A318THS6_9BRAD	9BRAD	1	Glutamyl-tRNA(Gln) amidotransferase subunit A OS=Rhodopseudomonas faecalis OX=99655 GN=gatA PE=3 SV=1	0.161743	9.70549e-05
tr|A0A318T6L8|A0A318T6L8_9BRAD	9BRAD	3	Glutaredoxin OS=Rhodopseudomonas faecalis OX=99655 GN=BJ122_1393 PE=3 SV=1	2.06601	0.0688584
tr|A0A318TLW9|A0A318TLW9_9BRAD	9BRAD	1	Glutaryl-CoA dehydrogenase OS=Rhodopseudomonas faecalis OX=99655 GN=BJ122_10425 PE=3 SV=1	0.409205	0.129335
tr|A0A318TJF9|A0A318TJF9_9BRAD	9BRAD	4	Glutathione S-transferase OS=Rhodopseudomonas faecalis OX=99655 GN=BJ122_103228 PE=4 SV=1	1.09451	0.686295
tr|A0A318TJG3|A0A318TJG3_9BRAD	9BRAD	2	Glutathione-dependent peroxiredoxin OS=Rhodopseudomonas faecalis OX=99655 GN=BJ122_11534 PE=3 SV=1	1.02526	0.921678
tr|A0A318TGE8|A0A318TGE8_9BRAD	9BRAD	5	Glyceraldehyde-3-phosphate dehydrogenase (NAD+) OS=Rhodopseudomonas faecalis OX=99655 GN=BJ122_10968 PE=3 SV=1	3.39242	0.0156112
tr|A0A318TDR2|A0A318TDR2_9BRAD	9BRAD	4	Glycogen operon protein OS=Rhodopseudomonas faecalis OX=99655 GN=BJ122_11070 PE=3 SV=1	0.708882	0.418915
tr|A0A318TRQ1|A0A318TRQ1_9BRAD	9BRAD	2	GMP synthase [glutamine-hydrolyzing] OS=Rhodopseudomonas faecalis OX=99655 GN=guaA PE=3 SV=1	0.664392	0.411937
tr|A0A318TE33|A0A318TE33_9BRAD	9BRAD	2	GreA/GreB family elongation factor OS=Rhodopseudomonas faecalis OX=99655 GN=BJ122_109126 PE=4 SV=1	0.991942	0.982204
tr|A0A318TAY0|A0A318TAY0_9BRAD	9BRAD	1	Helix-hairpin-helix protein OS=Rhodopseudomonas faecalis OX=99655 GN=BJ122_11446 PE=4 SV=1	0.875194	0.755064
tr|A0A318THF0|A0A318THF0_9BRAD	9BRAD	2	Hemerythrin-like domain-containing protein OS=Rhodopseudomonas faecalis OX=99655 GN=BJ122_11116 PE=4 SV=1	1.62396	0.00897267
tr|A0A318TFC6|A0A318TFC6_9BRAD	9BRAD	1	HemY protein OS=Rhodopseudomonas faecalis OX=99655 GN=BJ122_11620 PE=4 SV=1	0.119422	0.105132
tr|A0A318TPH0|A0A318TPH0_9BRAD	9BRAD	1	Heterodimeric methylmalonyl-CoA mutase small subunit OS=Rhodopseudomonas faecalis OX=99655 GN=BJ122_102124 PE=4 SV=1	0.689638	0.49963
tr|A0A318TMY4|A0A318TMY4_9BRAD	9BRAD	2	Histidine phosphotransferase ChpT OS=Rhodopseudomonas faecalis OX=99655 GN=BJ122_13223 PE=4 SV=1	0.778706	0.245915
tr|A0A318T8F7|A0A318T8F7_9BRAD	9BRAD	2	Histidinol-phosphate aminotransferase OS=Rhodopseudomonas faecalis OX=99655 GN=hisC PE=3 SV=1	0.556086	0.0961861
tr|A0A318TJX0|A0A318TJX0_9BRAD	9BRAD	2	HK97 family phage major capsid protein OS=Rhodopseudomonas faecalis OX=99655 GN=BJ122_102160 PE=4 SV=1	1.24074	0.592401
tr|A0A318TM39|A0A318TM39_9BRAD	9BRAD	1	HK97 family phage portal protein OS=Rhodopseudomonas faecalis OX=99655 GN=BJ122_102156 PE=4 SV=1	0.680526	0.514681
tr|A0A318TIK2|A0A318TIK2_9BRAD	9BRAD	1	HlyD family secretion protein OS=Rhodopseudomonas faecalis OX=99655 GN=BJ122_10939 PE=4 SV=1	1.22076	0.605014
tr|A0A318TEL2|A0A318TEL2_9BRAD	9BRAD	3	Homospermidine synthase OS=Rhodopseudomonas faecalis OX=99655 GN=BJ122_109125 PE=4 SV=1	1.4037	0.300172
tr|A0A318TFY1|A0A318TFY1_9BRAD	9BRAD	5	Hydroxymethylbilane synthase OS=Rhodopseudomonas faecalis OX=99655 GN=BJ122_11094 PE=3 SV=1	0.86642	0.610097
tr|A0A318TL71|A0A318TL71_9BRAD	9BRAD	1	IclR family transcriptional regulator OS=Rhodopseudomonas faecalis OX=99655 GN=BJ122_111105 PE=4 SV=1	1.53712	0.420656
tr|A0A318TR49|A0A318TR49_9BRAD	9BRAD	1	Indolepyruvate ferredoxin oxidoreductase beta subunit OS=Rhodopseudomonas faecalis OX=99655 GN=BJ122_10328 PE=4 SV=1	0.299129	0.118854
tr|A0A318TI69|A0A318TI69_9BRAD	9BRAD	2	Indolepyruvate oxidoreductase subunit IorA OS=Rhodopseudomonas faecalis OX=99655 GN=BJ122_10327 PE=4 SV=1	0.820226	0.702584
tr|A0A318TFB6|A0A318TFB6_9BRAD	9BRAD	2	Inorganic pyrophosphatase OS=Rhodopseudomonas faecalis OX=99655 GN=ppa PE=3 SV=1	0.945148	0.883444
tr|A0A318TUS8|A0A318TUS8_9BRAD	9BRAD	5	Inosine-5'-monophosphate dehydrogenase OS=Rhodopseudomonas faecalis OX=99655 GN=guaB PE=3 SV=1	2.01407	0.0507918
tr|A0A318TD85|A0A318TD85_9BRAD	9BRAD	2	Inositol-1-monophosphatase OS=Rhodopseudomonas faecalis OX=99655 GN=BJ122_10963 PE=3 SV=1	1.88897	0.0237552
tr|A0A318TL44|A0A318TL44_9BRAD	9BRAD	2	Integration host factor subunit alpha OS=Rhodopseudomonas faecalis OX=99655 GN=ihfA PE=3 SV=1	0.978595	0.946562
tr|A0A318TGY2|A0A318TGY2_9BRAD	9BRAD	2	Invasion protein IalB OS=Rhodopseudomonas faecalis OX=99655 GN=BJ122_10530 PE=4 SV=1	2.73735	0.01407
tr|A0A318TK27|A0A318TK27_9BRAD	9BRAD	1	Iron-sulfur cluster carrier protein OS=Rhodopseudomonas faecalis OX=99655 GN=BJ122_102292 PE=3 SV=1	1.17331	0.690632
tr|A0A318T7S5|A0A318T7S5_9BRAD	9BRAD	4	Isocitrate dehydrogenase [NADP] OS=Rhodopseudomonas faecalis OX=99655 GN=BJ122_1512 PE=3 SV=1	0.619743	0.175942
tr|A0A318TWL5|A0A318TWL5_9BRAD	9BRAD	1	Isoleucine--tRNA ligase OS=Rhodopseudomonas faecalis OX=99655 GN=ileS PE=3 SV=1	1.73981	0.417051
tr|A0A318TFU3|A0A318TFU3_9BRAD	9BRAD	2	K(+)-insensitive pyrophosphate-energized proton pump OS=Rhodopseudomonas faecalis OX=99655 GN=hppA PE=3 SV=1	1.31271	0.264941
tr|A0A318THL9|A0A318THL9_9BRAD	9BRAD	3	Ketol-acid reductoisomerase (NADP(+)) OS=Rhodopseudomonas faecalis OX=99655 GN=ilvC PE=3 SV=1	3.39574	0.00135841
tr|A0A318TKZ9|A0A318TKZ9_9BRAD	9BRAD	1	Lectin-like protein BA14k OS=Rhodopseudomonas faecalis OX=99655 GN=BJ122_101235 PE=3 SV=1	0.621287	0.2045
tr|A0A318TGF3|A0A318TGF3_9BRAD	9BRAD	2	Lectin-like protein BA14k OS=Rhodopseudomonas faecalis OX=99655 GN=BJ122_10684 PE=3 SV=1	0.781838	0.642664
tr|A0A318TH55|A0A318TH55_9BRAD	9BRAD	4	Leucine--tRNA ligase OS=Rhodopseudomonas faecalis OX=99655 GN=leuS PE=3 SV=1	0.63882	0.272015
tr|A0A318TH77|A0A318TH77_9BRAD	9BRAD	1	Light-harvesting protein B-800-850 alpha chain OS=Rhodopseudomonas faecalis OX=99655 GN=BJ122_104191 PE=4 SV=1	1.7906	0.0154173
tr|A0A318U0V8|A0A318U0V8_9BRAD	9BRAD	1	Light-harvesting protein B-800-850 beta chain OS=Rhodopseudomonas faecalis OX=99655 GN=BJ122_101292 PE=3 SV=1	1.14557	0.829229
tr|A0A318TI96|A0A318TI96_9BRAD	9BRAD	5	Light-independent protochlorophyllide reductase iron-sulfur ATP-binding protein OS=Rhodopseudomonas faecalis OX=99655 GN=bchL PE=3 SV=1	1.14976	0.486869
tr|A0A318TDT3|A0A318TDT3_9BRAD	9BRAD	2	Light-independent protochlorophyllide reductase subunit B OS=Rhodopseudomonas faecalis OX=99655 GN=bchB PE=3 SV=1	0.432316	0.0222657
tr|A0A318TLQ0|A0A318TLQ0_9BRAD	9BRAD	3	Light-independent protochlorophyllide reductase subunit N OS=Rhodopseudomonas faecalis OX=99655 GN=bchN PE=3 SV=1	0.967408	0.932458
tr|A0A318T733|A0A318T733_9BRAD	9BRAD	1	Lipoprotein-anchoring transpeptidase ErfK/SrfK OS=Rhodopseudomonas faecalis OX=99655 GN=BJ122_13215 PE=3 SV=1	0.822362	0.74738
tr|A0A318TBK5|A0A318TBK5_9BRAD	9BRAD	1	Lon N-terminal domain-containing protein OS=Rhodopseudomonas faecalis OX=99655 GN=BJ122_11274 PE=4 SV=1	1.433	0.557239
tr|A0A318TNG9|A0A318TNG9_9BRAD	9BRAD	10	Lon protease OS=Rhodopseudomonas faecalis OX=99655 GN=lon PE=2 SV=1	0.968322	0.884894
tr|A0A318TBN6|A0A318TBN6_9BRAD	9BRAD	1	Long-chain acyl-CoA synthetase OS=Rhodopseudomonas faecalis OX=99655 GN=BJ122_11535 PE=4 SV=1	0.309438	0.404506
tr|A0A318T827|A0A318T827_9BRAD	9BRAD	1	Long-chain acyl-CoA synthetase OS=Rhodopseudomonas faecalis OX=99655 GN=BJ122_1379 PE=4 SV=1	0.45945	0.0678607
tr|A0A318TTT4|A0A318TTT4_9BRAD	9BRAD	1	LTXXQ motif family protein OS=Rhodopseudomonas faecalis OX=99655 GN=BJ122_10111 PE=3 SV=1	1.816	0.0581993
tr|A0A318TMW8|A0A318TMW8_9BRAD	9BRAD	1	LuxR family two component transcriptional regulator OS=Rhodopseudomonas faecalis OX=99655 GN=BJ122_108145 PE=4 SV=1	1.47237	0.269018
tr|A0A318TGR7|A0A318TGR7_9BRAD	9BRAD	1	LuxR family two component transcriptional regulator OS=Rhodopseudomonas faecalis OX=99655 GN=BJ122_109112 PE=4 SV=1	0.877083	0.783193
tr|A0A318TI68|A0A318TI68_9BRAD	9BRAD	2	Lysine--tRNA ligase OS=Rhodopseudomonas faecalis OX=99655 GN=lysS PE=3 SV=1	0.673002	0.112849
tr|A0A318TFT7|A0A318TFT7_9BRAD	9BRAD	1	Malate dehydrogenase (Oxaloacetate-decarboxylating)(NADP+) OS=Rhodopseudomonas faecalis OX=99655 GN=BJ122_107147 PE=3 SV=1	0.292573	0.0285374
tr|A0A318TEI2|A0A318TEI2_9BRAD	9BRAD	3	Malonyl CoA-acyl carrier protein transacylase OS=Rhodopseudomonas faecalis OX=99655 GN=BJ122_107116 PE=3 SV=1	1.20393	0.421559
tr|A0A318TG42|A0A318TG42_9BRAD	9BRAD	1	Membrane fusion protein (Multidrug efflux system) OS=Rhodopseudomonas faecalis OX=99655 GN=BJ122_11087 PE=3 SV=1	0.975457	0.95693
tr|A0A318T8C1|A0A318T8C1_9BRAD	9BRAD	1	Membrane protein insertase YidC OS=Rhodopseudomonas faecalis OX=99655 GN=yidC PE=3 SV=1	0.521735	0.230633
tr|A0A318TAZ7|A0A318TAZ7_9BRAD	9BRAD	2	Methylenetetrahydrofolate reductase OS=Rhodopseudomonas faecalis OX=99655 GN=BJ122_11866 PE=3 SV=1	3.80659	0.00248008
tr|A0A318TLR3|A0A318TLR3_9BRAD	9BRAD	5	Methylisocitrate lyase OS=Rhodopseudomonas faecalis OX=99655 GN=BJ122_101152 PE=3 SV=1	1.4121	0.0721924
tr|A0A318TNB8|A0A318TNB8_9BRAD	9BRAD	9	Methylmalonate-semialdehyde dehydrogenase [acylating] OS=Rhodopseudomonas faecalis OX=99655 GN=BJ122_101116 PE=4 SV=1	2.30806	0.0100275
tr|A0A318U0L4|A0A318U0L4_9BRAD	9BRAD	1	Methylmalonyl-CoA epimerase /ethylmalonyl-CoA epimerase OS=Rhodopseudomonas faecalis OX=99655 GN=BJ122_101202 PE=3 SV=1	2.35553	0.0480326
tr|A0A318T6X8|A0A318T6X8_9BRAD	9BRAD	1	Methylthioribose-1-phosphate isomerase OS=Rhodopseudomonas faecalis OX=99655 GN=mtnA PE=3 SV=1	0.344913	0.241783
tr|A0A318TI54|A0A318TI54_9BRAD	9BRAD	7	Mg-protoporphyrin IX chelatase OS=Rhodopseudomonas faecalis OX=99655 GN=BJ122_11095 PE=3 SV=1	1.73033	0.0215504
tr|A0A318TSX4|A0A318TSX4_9BRAD	9BRAD	1	Mg-protoporphyrin IX chelatase OS=Rhodopseudomonas faecalis OX=99655 GN=BJ122_11096 PE=3 SV=1	0.781862	0.589154
tr|A0A318THW2|A0A318THW2_9BRAD	9BRAD	2	Microcin-processing peptidase 1 OS=Rhodopseudomonas faecalis OX=99655 GN=BJ122_103105 PE=3 SV=1	0.171011	0.0991937
tr|A0A318T8M8|A0A318T8M8_9BRAD	9BRAD	1	Molecular chaperone Hsp33 OS=Rhodopseudomonas faecalis OX=99655 GN=BJ122_1285 PE=4 SV=1	0.466718	0.0569622
tr|A0A318TJH1|A0A318TJH1_9BRAD	9BRAD	6	Molecular chaperone IbpA OS=Rhodopseudomonas faecalis OX=99655 GN=BJ122_103238 PE=3 SV=1	0.731709	0.534262
tr|A0A318TN74|A0A318TN74_9BRAD	9BRAD	1	Molybdenum cofactor synthesis domain-containing protein OS=Rhodopseudomonas faecalis OX=99655 GN=BJ122_10157 PE=4 SV=1	0.887589	0.807519
tr|A0A318TZN9|A0A318TZN9_9BRAD	9BRAD	1	MoxR-like ATPase OS=Rhodopseudomonas faecalis OX=99655 GN=BJ122_102335 PE=4 SV=1	0.328759	0.0548101
tr|A0A318TBI4|A0A318TBI4_9BRAD	9BRAD	1	MoxR-like ATPase OS=Rhodopseudomonas faecalis OX=99655 GN=BJ122_11263 PE=4 SV=1	0.51412	0.150215
tr|A0A318TIJ2|A0A318TIJ2_9BRAD	9BRAD	2	Multidrug efflux pump subunit AcrB OS=Rhodopseudomonas faecalis OX=99655 GN=BJ122_10929 PE=4 SV=1	0.201568	0.137564
tr|A0A318TI01|A0A318TI01_9BRAD	9BRAD	2	N-acetyl-gamma-glutamyl-phosphate reductase OS=Rhodopseudomonas faecalis OX=99655 GN=argC PE=3 SV=1	1.5037	0.250107
tr|A0A318TDD0|A0A318TDD0_9BRAD	9BRAD	6	NAD(P) transhydrogenase alpha subunit OS=Rhodopseudomonas faecalis OX=99655 GN=BJ122_11183 PE=3 SV=1	1.5861	0.0732743
tr|A0A318TCD7|A0A318TCD7_9BRAD	9BRAD	2	NAD(P) transhydrogenase subunit beta OS=Rhodopseudomonas faecalis OX=99655 GN=BJ122_11181 PE=3 SV=1	1.70897	0.107706
tr|A0A318TLN6|A0A318TLN6_9BRAD	9BRAD	1	NAD(P)-dependent dehydrogenase (Short-subunit alcohol dehydrogenase family) OS=Rhodopseudomonas faecalis OX=99655 GN=BJ122_101122 PE=3 SV=1	0.460063	0.318095
tr|A0A318TIZ5|A0A318TIZ5_9BRAD	9BRAD	1	NAD(P)-dependent dehydrogenase (Short-subunit alcohol dehydrogenase family) OS=Rhodopseudomonas faecalis OX=99655 GN=BJ122_10266 PE=4 SV=1	0.190413	0.00487005
tr|A0A318TMM1|A0A318TMM1_9BRAD	9BRAD	1	NAD(P)-dependent dehydrogenase (Short-subunit alcohol dehydrogenase family) OS=Rhodopseudomonas faecalis OX=99655 GN=BJ122_10830 PE=3 SV=1	1.21374	0.381898
tr|A0A318TLY5|A0A318TLY5_9BRAD	9BRAD	2	NAD(P)-dependent dehydrogenase (Short-subunit alcohol dehydrogenase family) OS=Rhodopseudomonas faecalis OX=99655 GN=BJ122_1095 PE=4 SV=1	1.6599	0.248907
tr|A0A318U0K5|A0A318U0K5_9BRAD	9BRAD	1	NADH-quinone oxidoreductase OS=Rhodopseudomonas faecalis OX=99655 GN=BJ122_101192 PE=3 SV=1	1.97716	0.234116
tr|A0A318TVR0|A0A318TVR0_9BRAD	9BRAD	1	NADPH:quinone reductase-like Zn-dependent oxidoreductase OS=Rhodopseudomonas faecalis OX=99655 GN=BJ122_10536 PE=3 SV=1	1.52705	0.232091
tr|A0A318TJK4|A0A318TJK4_9BRAD	9BRAD	1	NepR domain-containing protein OS=Rhodopseudomonas faecalis OX=99655 GN=BJ122_11576 PE=4 SV=1	0.813823	0.684698
tr|A0A318TB05|A0A318TB05_9BRAD	9BRAD	6	N-ethylmaleimide reductase OS=Rhodopseudomonas faecalis OX=99655 GN=BJ122_13323 PE=4 SV=1	0.773545	0.134855
tr|A0A318TP00|A0A318TP00_9BRAD	9BRAD	1	Nicotinate-nucleotide--dimethylbenzimidazole phosphoribosyltransferase OS=Rhodopseudomonas faecalis OX=99655 GN=cobT PE=3 SV=1	2.81183	0.0138379
tr|A0A318TKM7|A0A318TKM7_9BRAD	9BRAD	3	Nitrogen regulatory protein P-II OS=Rhodopseudomonas faecalis OX=99655 GN=BJ122_101171 PE=3 SV=1	1.63177	0.0877384
tr|A0A318TF09|A0A318TF09_9BRAD	9BRAD	1	Nitrogen regulatory protein P-II OS=Rhodopseudomonas faecalis OX=99655 GN=BJ122_11279 PE=3 SV=1	0.730976	0.262677
tr|A0A318TK62|A0A318TK62_9BRAD	9BRAD	2	Nitrogenase iron protein OS=Rhodopseudomonas faecalis OX=99655 GN=nifH PE=3 SV=1	0.257075	0.0814033
tr|A0A318THI9|A0A318THI9_9BRAD	9BRAD	1	Nitrogenase protein alpha chain OS=Rhodopseudomonas faecalis OX=99655 GN=BJ122_104176 PE=3 SV=1	0.0590021	0.0888888
tr|A0A318THH4|A0A318THH4_9BRAD	9BRAD	2	Nitronate monooxygenase OS=Rhodopseudomonas faecalis OX=99655 GN=BJ122_10781 PE=4 SV=1	0.619809	0.0450619
tr|A0A318TE09|A0A318TE09_9BRAD	9BRAD	2	Nucleoid DNA-binding protein OS=Rhodopseudomonas faecalis OX=99655 GN=BJ122_10836 PE=3 SV=1	1.63495	0.0721121
tr|A0A318TGN0|A0A318TGN0_9BRAD	9BRAD	1	Nucleoid-associated protein BJ122_109140 OS=Rhodopseudomonas faecalis OX=99655 GN=BJ122_109140 PE=3 SV=1	0.448988	0.0128338
tr|A0A318TEL6|A0A318TEL6_9BRAD	9BRAD	1	Nucleoside diphosphate kinase OS=Rhodopseudomonas faecalis OX=99655 GN=ndk PE=3 SV=1	0.159548	0.10899
tr|A0A318THB0|A0A318THB0_9BRAD	9BRAD	2	O-acetylhomoserine sulfhydrylase OS=Rhodopseudomonas faecalis OX=99655 GN=BJ122_105131 PE=3 SV=1	0.513085	0.41748
tr|A0A318TFG8|A0A318TFG8_9BRAD	9BRAD	2	Oligoendopeptidase F OS=Rhodopseudomonas faecalis OX=99655 GN=BJ122_11187 PE=3 SV=1	0.922709	0.798631
tr|A0A318T900|A0A318T900_9BRAD	9BRAD	1	Ornithine carbamoyltransferase OS=Rhodopseudomonas faecalis OX=99655 GN=BJ122_1284 PE=3 SV=1	0.755575	0.619123
tr|A0A318T6I4|A0A318T6I4_9BRAD	9BRAD	1	Orotate phosphoribosyltransferase OS=Rhodopseudomonas faecalis OX=99655 GN=pyrE PE=3 SV=1	0.640787	0.409005
tr|A0A318TN96|A0A318TN96_9BRAD	9BRAD	1	O-succinylhomoserine sulfhydrylase OS=Rhodopseudomonas faecalis OX=99655 GN=metZ PE=3 SV=1	1.40828	0.203188
tr|A0A318TM98|A0A318TM98_9BRAD	9BRAD	3	Outer membrane immunogenic protein OS=Rhodopseudomonas faecalis OX=99655 GN=BJ122_109117 PE=4 SV=1	0.685595	0.277165
tr|A0A318T7S1|A0A318T7S1_9BRAD	9BRAD	1	Outer membrane immunogenic protein OS=Rhodopseudomonas faecalis OX=99655 GN=BJ122_12620 PE=4 SV=1	0.635604	0.279163
tr|A0A318TNK5|A0A318TNK5_9BRAD	9BRAD	3	Outer membrane protein assembly factor BamA OS=Rhodopseudomonas faecalis OX=99655 GN=bamA PE=3 SV=1	0.694792	0.180267
tr|A0A318TCA8|A0A318TCA8_9BRAD	9BRAD	2	Outer membrane protein OmpA-like peptidoglycan-associated protein OS=Rhodopseudomonas faecalis OX=99655 GN=BJ122_12263 PE=4 SV=1	0.873313	0.813351
tr|A0A318TUF3|A0A318TUF3_9BRAD	9BRAD	1	Parvulin-like PPIase OS=Rhodopseudomonas faecalis OX=99655 GN=BJ122_101248 PE=3 SV=1	0.528352	0.336585
tr|A0A318TI72|A0A318TI72_9BRAD	9BRAD	3	Parvulin-like PPIase OS=Rhodopseudomonas faecalis OX=99655 GN=BJ122_12175 PE=3 SV=1	1.55743	0.0245174
tr|A0A318TFD4|A0A318TFD4_9BRAD	9BRAD	1	PBP family phospholipid-binding protein OS=Rhodopseudomonas faecalis OX=99655 GN=BJ122_11630 PE=4 SV=1	2.63087	0.003534
tr|A0A318TGC4|A0A318TGC4_9BRAD	9BRAD	1	Peptidase_S15 domain-containing protein OS=Rhodopseudomonas faecalis OX=99655 GN=BJ122_10654 PE=4 SV=1	0.852768	0.302971
tr|A0A318TLD3|A0A318TLD3_9BRAD	9BRAD	1	Peptidyl-prolyl cis-trans isomerase OS=Rhodopseudomonas faecalis OX=99655 GN=BJ122_101289 PE=3 SV=1	0.408347	0.429199
tr|A0A318TJ06|A0A318TJ06_9BRAD	9BRAD	2	Peptidyl-prolyl cis-trans isomerase OS=Rhodopseudomonas faecalis OX=99655 GN=BJ122_11748 PE=3 SV=1	0.699789	0.149589
tr|A0A318TDD5|A0A318TDD5_9BRAD	9BRAD	1	Peptidyl-prolyl cis-trans isomerase OS=Rhodopseudomonas faecalis OX=99655 GN=BJ122_11750 PE=3 SV=1	1.69561	0.518254
tr|A0A318TKM6|A0A318TKM6_9BRAD	9BRAD	6	Periplasmic serine endoprotease DegP-like OS=Rhodopseudomonas faecalis OX=99655 GN=BJ122_102189 PE=3 SV=1	0.966866	0.88696
tr|A0A318T8E4|A0A318T8E4_9BRAD	9BRAD	1	Periplasmic serine endoprotease DegP-like OS=Rhodopseudomonas faecalis OX=99655 GN=BJ122_1237 PE=3 SV=1	0.475297	0.280123
tr|A0A318TAF1|A0A318TAF1_9BRAD	9BRAD	3	Periplasmic serine endoprotease DegP-like OS=Rhodopseudomonas faecalis OX=99655 GN=BJ122_1494 PE=3 SV=1	0.543229	0.197459
tr|A0A318TXK6|A0A318TXK6_9BRAD	9BRAD	1	Phenylacetate-coenzyme A ligase OS=Rhodopseudomonas faecalis OX=99655 GN=BJ122_10332 PE=3 SV=1	2.49363	0.00609549
tr|A0A318TE26|A0A318TE26_9BRAD	9BRAD	1	Phenylalanine--tRNA ligase alpha subunit OS=Rhodopseudomonas faecalis OX=99655 GN=pheS PE=3 SV=1	0.848964	0.715986
tr|A0A318TAG2|A0A318TAG2_9BRAD	9BRAD	4	Phenylalanine--tRNA ligase beta subunit OS=Rhodopseudomonas faecalis OX=99655 GN=pheT PE=3 SV=1	0.807332	0.138627
tr|A0A318TDJ5|A0A318TDJ5_9BRAD	9BRAD	1	PhnB protein OS=Rhodopseudomonas faecalis OX=99655 GN=BJ122_10972 PE=4 SV=1	0.569257	0.151223
tr|A0A318T6Y8|A0A318T6Y8_9BRAD	9BRAD	10	Phosphate-binding protein PstS OS=Rhodopseudomonas faecalis OX=99655 GN=BJ122_13814 PE=3 SV=1	1.20257	0.304411
tr|A0A318TJN9|A0A318TJN9_9BRAD	9BRAD	2	Phosphatidylserine decarboxylase proenzyme OS=Rhodopseudomonas faecalis OX=99655 GN=psd PE=3 SV=1	0.402794	0.178157
tr|A0A318TMI2|A0A318TMI2_9BRAD	9BRAD	1	Phospho-2-dehydro-3-deoxyheptonate aldolase OS=Rhodopseudomonas faecalis OX=99655 GN=BJ122_102303 PE=3 SV=1	0.497446	0.0464357
tr|A0A318TXZ6|A0A318TXZ6_9BRAD	9BRAD	3	Phosphofructokinase OS=Rhodopseudomonas faecalis OX=99655 GN=BJ122_103184 PE=3 SV=1	1.04169	0.90581
tr|A0A318TI34|A0A318TI34_9BRAD	9BRAD	1	Phosphoglucomutase OS=Rhodopseudomonas faecalis OX=99655 GN=BJ122_11075 PE=3 SV=1	0.613112	0.382919
tr|A0A318TJN0|A0A318TJN0_9BRAD	9BRAD	1	Phosphoglycolate phosphatase OS=Rhodopseudomonas faecalis OX=99655 GN=BJ122_102298 PE=3 SV=1	1.35897	0.626096
tr|A0A318T820|A0A318T820_9BRAD	9BRAD	1	Phosphomethylpyrimidine synthase OS=Rhodopseudomonas faecalis OX=99655 GN=thiC PE=3 SV=1	0.208014	0.00587218
tr|A0A318T6Q4|A0A318T6Q4_9BRAD	9BRAD	1	Phosphoribosyl-ATP pyrophosphatase OS=Rhodopseudomonas faecalis OX=99655 GN=hisE PE=3 SV=1	0.778548	0.613252
tr|A0A318TNF7|A0A318TNF7_9BRAD	9BRAD	3	Phosphoribosylformylglycinamidine cyclo-ligase OS=Rhodopseudomonas faecalis OX=99655 GN=purM PE=3 SV=1	1.41952	0.284044
tr|A0A318TAP1|A0A318TAP1_9BRAD	9BRAD	1	Phosphoribosylformylglycinamidine synthase subunit PurL OS=Rhodopseudomonas faecalis OX=99655 GN=purL PE=3 SV=1	1.18914	0.671911
tr|A0A318T6N1|A0A318T6N1_9BRAD	9BRAD	3	Phosphoribosylformylglycinamidine synthase subunit PurS OS=Rhodopseudomonas faecalis OX=99655 GN=purS PE=3 SV=1	0.892513	0.672448
tr|A0A318TF95|A0A318TF95_9BRAD	9BRAD	3	Phosphoribulokinase OS=Rhodopseudomonas faecalis OX=99655 GN=BJ122_106137 PE=3 SV=1	1.14113	0.695077
tr|A0A318TBE3|A0A318TBE3_9BRAD	9BRAD	6	Phosphoserine aminotransferase OS=Rhodopseudomonas faecalis OX=99655 GN=BJ122_11513 PE=4 SV=1	1.70428	0.0065084
tr|A0A318TKG6|A0A318TKG6_9BRAD	9BRAD	1	Phosphotransferase IIA-like nitrogen-regulatory protein PtsN OS=Rhodopseudomonas faecalis OX=99655 GN=BJ122_11246 PE=4 SV=1	0.642234	0.368141
tr|A0A318TD44|A0A318TD44_9BRAD	9BRAD	14	Photosynthetic reaction center H subunit OS=Rhodopseudomonas faecalis OX=99655 GN=BJ122_110138 PE=4 SV=1	1.97458	0.0289134
tr|A0A318TFY9|A0A318TFY9_9BRAD	9BRAD	1	Phytoene desaturase OS=Rhodopseudomonas faecalis OX=99655 GN=BJ122_110104 PE=3 SV=1	0.681686	0.416437
tr|A0A318TLM3|A0A318TLM3_9BRAD	9BRAD	4	Pimeloyl-ACP methyl ester carboxylesterase OS=Rhodopseudomonas faecalis OX=99655 GN=BJ122_110102 PE=4 SV=1	0.719699	0.262911
tr|A0A318TCG5|A0A318TCG5_9BRAD	9BRAD	4	Pimeloyl-ACP methyl ester carboxylesterase OS=Rhodopseudomonas faecalis OX=99655 GN=BJ122_11265 PE=4 SV=1	0.901282	0.578209
tr|A0A318TBY0|A0A318TBY0_9BRAD	9BRAD	2	Pimeloyl-ACP methyl ester carboxylesterase OS=Rhodopseudomonas faecalis OX=99655 GN=BJ122_11411 PE=4 SV=1	0.209325	0.0310161
tr|A0A318TGU1|A0A318TGU1_9BRAD	9BRAD	4	Pimeloyl-CoA dehydrogenase small subunit OS=Rhodopseudomonas faecalis OX=99655 GN=BJ122_1082 PE=3 SV=1	0.644309	0.0422879
tr|A0A318THZ4|A0A318THZ4_9BRAD	9BRAD	2	PKS_ER domain-containing protein OS=Rhodopseudomonas faecalis OX=99655 GN=BJ122_107154 PE=4 SV=1	0.647486	0.176793
tr|A0A318T8W5|A0A318T8W5_9BRAD	9BRAD	3	Polyhydroxyalkanoate synthesis repressor PhaR OS=Rhodopseudomonas faecalis OX=99655 GN=BJ122_12151 PE=4 SV=1	1.77525	0.00694003
tr|A0A318TE72|A0A318TE72_9BRAD	9BRAD	12	Polyribonucleotide nucleotidyltransferase OS=Rhodopseudomonas faecalis OX=99655 GN=pnp PE=3 SV=1	1.76195	0.0731472
tr|A0A318THL5|A0A318THL5_9BRAD	9BRAD	3	Probable cytosol aminopeptidase OS=Rhodopseudomonas faecalis OX=99655 GN=pepA PE=3 SV=1	0.843747	0.177338
tr|A0A318TGI7|A0A318TGI7_9BRAD	9BRAD	3	Probable transcriptional regulatory protein BJ122_10998 OS=Rhodopseudomonas faecalis OX=99655 GN=BJ122_10998 PE=3 SV=1	1.34827	0.0345437
tr|A0A318TKX1|A0A318TKX1_9BRAD	9BRAD	1	Proline--tRNA ligase OS=Rhodopseudomonas faecalis OX=99655 GN=proS PE=3 SV=1	0.534472	0.151394
tr|A0A318TF87|A0A318TF87_9BRAD	9BRAD	9	Propionyl-CoA carboxylase OS=Rhodopseudomonas faecalis OX=99655 GN=BJ122_10729 PE=4 SV=1	0.820617	0.299007
tr|A0A318TM49|A0A318TM49_9BRAD	9BRAD	9	Propionyl-CoA synthetase OS=Rhodopseudomonas faecalis OX=99655 GN=BJ122_104106 PE=3 SV=1	0.924748	0.500453
tr|A0A318TCA3|A0A318TCA3_9BRAD	9BRAD	3	Protein GrpE OS=Rhodopseudomonas faecalis OX=99655 GN=grpE PE=3 SV=1	1.14832	0.403181
tr|A0A318T9N4|A0A318T9N4_9BRAD	9BRAD	5	Protein HflC OS=Rhodopseudomonas faecalis OX=99655 GN=BJ122_1239 PE=3 SV=1	0.967471	0.912878
tr|A0A318T9C4|A0A318T9C4_9BRAD	9BRAD	7	Protein HflK OS=Rhodopseudomonas faecalis OX=99655 GN=BJ122_12310 PE=3 SV=1	1.81466	0.0422898
tr|A0A318T800|A0A318T800_9BRAD	9BRAD	2	Protein RecA OS=Rhodopseudomonas faecalis OX=99655 GN=recA PE=3 SV=1	2.33772	0.0243631
tr|A0A318TA32|A0A318TA32_9BRAD	9BRAD	12	Protein translocase subunit SecA OS=Rhodopseudomonas faecalis OX=99655 GN=secA PE=3 SV=1	0.743764	0.0387104
tr|A0A318TGX4|A0A318TGX4_9BRAD	9BRAD	1	Protein translocase subunit SecD OS=Rhodopseudomonas faecalis OX=99655 GN=secD PE=3 SV=1	1.26997	0.688845
tr|A0A318TI48|A0A318TI48_9BRAD	9BRAD	1	Protein-disulfide isomerase OS=Rhodopseudomonas faecalis OX=99655 GN=BJ122_103175 PE=3 SV=1	0.465441	0.335617
tr|A0A318TI39|A0A318TI39_9BRAD	9BRAD	2	Protein-disulfide isomerase OS=Rhodopseudomonas faecalis OX=99655 GN=BJ122_10491 PE=3 SV=1	0.459815	0.0178704
tr|A0A318THH3|A0A318THH3_9BRAD	9BRAD	1	Protein-export membrane protein SecF OS=Rhodopseudomonas faecalis OX=99655 GN=secF PE=3 SV=1	0.954351	0.897885
tr|A0A318TCZ7|A0A318TCZ7_9BRAD	9BRAD	1	Protein-export protein SecB OS=Rhodopseudomonas faecalis OX=99655 GN=secB PE=3 SV=1	1.32034	0.531886
tr|A0A318TN76|A0A318TN76_9BRAD	9BRAD	1	PTS system mannose-specific IIA component OS=Rhodopseudomonas faecalis OX=99655 GN=BJ122_103131 PE=4 SV=1	0.441581	0.163892
tr|A0A318T867|A0A318T867_9BRAD	9BRAD	1	Putative DNA-binding ribbon-helix-helix protein OS=Rhodopseudomonas faecalis OX=99655 GN=BJ122_12319 PE=4 SV=1	2.48064	0.0145598
tr|A0A318TCK0|A0A318TCK0_9BRAD	9BRAD	1	Putative lipid-binding transport protein (Tim44 family) OS=Rhodopseudomonas faecalis OX=99655 GN=BJ122_112106 PE=3 SV=1	1.05804	0.888158
tr|A0A318T7Y3|A0A318T7Y3_9BRAD	9BRAD	1	Putative lipid-binding transport protein (Tim44 family) OS=Rhodopseudomonas faecalis OX=99655 GN=BJ122_12734 PE=4 SV=1	0.588468	0.32182
tr|A0A318T9E1|A0A318T9E1_9BRAD	9BRAD	4	Putative membrane protein OS=Rhodopseudomonas faecalis OX=99655 GN=BJ122_11966 PE=4 SV=1	1.28837	0.658627
tr|A0A318TDP3|A0A318TDP3_9BRAD	9BRAD	1	Putative membrane-anchored protein OS=Rhodopseudomonas faecalis OX=99655 GN=BJ122_11093 PE=4 SV=1	0.0725993	0.0266872
tr|A0A318TEU6|A0A318TEU6_9BRAD	9BRAD	2	Putative surface protein with fasciclin (FAS1) repeats OS=Rhodopseudomonas faecalis OX=99655 GN=BJ122_1126 PE=4 SV=1	2.5069	0.116015
tr|A0A318TN17|A0A318TN17_9BRAD	9BRAD	1	Putative unusual protein kinase regulating ubiquinone biosynthesis (AarF/ABC1/UbiB family) OS=Rhodopseudomonas faecalis OX=99655 GN=BJ122_1302 PE=4 SV=1	1.85375	0.431996
tr|A0A318TIP4|A0A318TIP4_9BRAD	9BRAD	1	Putative Zn-dependent peptidase OS=Rhodopseudomonas faecalis OX=99655 GN=BJ122_10989 PE=3 SV=1	0.654695	0.446189
tr|A0A318TBG4|A0A318TBG4_9BRAD	9BRAD	1	Pyruvate carboxylase OS=Rhodopseudomonas faecalis OX=99655 GN=BJ122_11668 PE=4 SV=1	0.163563	0.132768
tr|A0A318TI59|A0A318TI59_9BRAD	9BRAD	16	Pyruvate-ferredoxin/flavodoxin oxidoreductase OS=Rhodopseudomonas faecalis OX=99655 GN=BJ122_103186 PE=3 SV=1	1.27705	0.359419
tr|A0A318TBT0|A0A318TBT0_9BRAD	9BRAD	4	Response regulator receiver domain-containing protein OS=Rhodopseudomonas faecalis OX=99655 GN=BJ122_11577 PE=4 SV=1	2.14291	0.0120604
tr|A0A318TDL6|A0A318TDL6_9BRAD	9BRAD	2	Rhodanese-related sulfurtransferase OS=Rhodopseudomonas faecalis OX=99655 GN=BJ122_11063 PE=4 SV=1	0.924462	0.912059
tr|A0A318TBM7|A0A318TBM7_9BRAD	9BRAD	1	Ribonuclease D OS=Rhodopseudomonas faecalis OX=99655 GN=BJ122_11252 PE=4 SV=1	0.83142	0.73008
tr|A0A318TF30|A0A318TF30_9BRAD	9BRAD	1	Ribonuclease E OS=Rhodopseudomonas faecalis OX=99655 GN=rne PE=3 SV=1	0.875401	0.554449
tr|A0A318TJV5|A0A318TJV5_9BRAD	9BRAD	1	Ribonuclease PH OS=Rhodopseudomonas faecalis OX=99655 GN=rph PE=3 SV=1	0.768375	0.344661
tr|A0A318TKY2|A0A318TKY2_9BRAD	9BRAD	1	Ribose-5-phosphate isomerase A OS=Rhodopseudomonas faecalis OX=99655 GN=rpiA PE=3 SV=1	0.887409	0.848619
tr|A0A318TAF7|A0A318TAF7_9BRAD	9BRAD	1	Ribose-phosphate pyrophosphokinase OS=Rhodopseudomonas faecalis OX=99655 GN=prs PE=3 SV=1	0.74795	0.274193
tr|A0A318TCN1|A0A318TCN1_9BRAD	9BRAD	1	Ribosome hibernation promoting factor OS=Rhodopseudomonas faecalis OX=99655 GN=hpf PE=3 SV=1	1.98864	0.00349484
tr|A0A318T8U8|A0A318T8U8_9BRAD	9BRAD	1	Ribosome maturation factor RimP OS=Rhodopseudomonas faecalis OX=99655 GN=rimP PE=3 SV=1	0.937296	0.894219
tr|A0A318TID6|A0A318TID6_9BRAD	9BRAD	1	Ribosome-binding ATPase YchF OS=Rhodopseudomonas faecalis OX=99655 GN=ychF PE=3 SV=1	0.00758704	0.373206
tr|A0A318TI32|A0A318TI32_9BRAD	9BRAD	1	Ribosome-binding factor A OS=Rhodopseudomonas faecalis OX=99655 GN=rbfA PE=3 SV=1	0.219484	0.307246
tr|A0A318TKX9|A0A318TKX9_9BRAD	9BRAD	4	Ribosome-recycling factor OS=Rhodopseudomonas faecalis OX=99655 GN=frr PE=3 SV=1	1.46781	0.0148044
tr|A0A318TSG7|A0A318TSG7_9BRAD	9BRAD	1	Ribulose-phosphate 3-epimerase OS=Rhodopseudomonas faecalis OX=99655 GN=rpe PE=3 SV=1	0.604817	0.511444
tr|A0A318TBK9|A0A318TBK9_9BRAD	9BRAD	3	RNA polymerase sigma factor OS=Rhodopseudomonas faecalis OX=99655 GN=BJ122_11575 PE=3 SV=1	1.2011	0.480854
tr|A0A318TTB8|A0A318TTB8_9BRAD	9BRAD	7	RND family efflux transporter MFP subunit OS=Rhodopseudomonas faecalis OX=99655 GN=BJ122_10930 PE=3 SV=1	1.31072	0.0941037
tr|A0A318TCQ0|A0A318TCQ0_9BRAD	9BRAD	3	S1 motif domain-containing protein OS=Rhodopseudomonas faecalis OX=99655 GN=BJ122_11267 PE=4 SV=1	0.529602	0.00552805
tr|A0A318T815|A0A318T815_9BRAD	9BRAD	9	S41A family C-terminal processing peptidase-3 OS=Rhodopseudomonas faecalis OX=99655 GN=BJ122_12425 PE=3 SV=1	1.13765	0.516116
tr|A0A318T8K1|A0A318T8K1_9BRAD	9BRAD	4	S-adenosylmethionine synthase OS=Rhodopseudomonas faecalis OX=99655 GN=metK PE=3 SV=1	1.62679	0.0526583
tr|A0A318TL35|A0A318TL35_9BRAD	9BRAD	1	Sec-independent protein translocase protein TatA OS=Rhodopseudomonas faecalis OX=99655 GN=tatA PE=3 SV=1	1.99878	0.0435928
tr|A0A318TMH5|A0A318TMH5_9BRAD	9BRAD	8	Secreted protein OS=Rhodopseudomonas faecalis OX=99655 GN=BJ122_102293 PE=3 SV=1	1.64014	0.0142641
tr|A0A318TPH9|A0A318TPH9_9BRAD	9BRAD	5	Serine hydroxymethyltransferase OS=Rhodopseudomonas faecalis OX=99655 GN=glyA PE=3 SV=1	1.41862	0.347007
tr|A0A318TJT0|A0A318TJT0_9BRAD	9BRAD	2	Short chain enoyl-CoA hydratase OS=Rhodopseudomonas faecalis OX=99655 GN=BJ122_102109 PE=3 SV=1	0.98089	0.938928
tr|A0A318TGK8|A0A318TGK8_9BRAD	9BRAD	1	Signal peptidase I OS=Rhodopseudomonas faecalis OX=99655 GN=BJ122_10551 PE=3 SV=1	0.495838	0.332512
tr|A0A318TAY8|A0A318TAY8_9BRAD	9BRAD	5	Signal recognition particle protein OS=Rhodopseudomonas faecalis OX=99655 GN=ffh PE=3 SV=1	0.670449	0.04391
tr|A0A318TC65|A0A318TC65_9BRAD	9BRAD	1	Signal recognition particle receptor FtsY OS=Rhodopseudomonas faecalis OX=99655 GN=ftsY PE=3 SV=1	0.911628	0.861416
tr|A0A318TSN4|A0A318TSN4_9BRAD	9BRAD	1	Single cache domain-containing protein OS=Rhodopseudomonas faecalis OX=99655 GN=BJ122_10280 PE=4 SV=1	0.4305	0.431488
tr|A0A318TFD5|A0A318TFD5_9BRAD	9BRAD	5	Single cache domain-containing protein OS=Rhodopseudomonas faecalis OX=99655 GN=BJ122_10790 PE=4 SV=1	2.83561	0.012276
tr|A0A318THE7|A0A318THE7_9BRAD	9BRAD	2	Single-stranded DNA-binding protein OS=Rhodopseudomonas faecalis OX=99655 GN=BJ122_105161 PE=3 SV=1	1.24221	0.584408
tr|A0A318TAM1|A0A318TAM1_9BRAD	9BRAD	3	S-methyl-5'-thioadenosine phosphorylase OS=Rhodopseudomonas faecalis OX=99655 GN=mtnP PE=3 SV=1	1.44283	0.251326
tr|A0A318TJ77|A0A318TJ77_9BRAD	9BRAD	1	SoxAX cytochrome complex subunit A OS=Rhodopseudomonas faecalis OX=99655 GN=BJ122_11647 PE=3 SV=1	0.0885978	0.392299
tr|A0A318TBT9|A0A318TBT9_9BRAD	9BRAD	7	Sporulation protein YlmC with PRC-barrel domain OS=Rhodopseudomonas faecalis OX=99655 GN=BJ122_14013 PE=4 SV=1	1.05153	0.944054
tr|A0A318THD6|A0A318THD6_9BRAD	9BRAD	1	Squalene-hopene/tetraprenyl-beta-curcumene cyclase OS=Rhodopseudomonas faecalis OX=99655 GN=BJ122_104114 PE=3 SV=1	0.304286	0.0342735
tr|A0A318TKY8|A0A318TKY8_9BRAD	9BRAD	4	Starvation-inducible DNA-binding protein OS=Rhodopseudomonas faecalis OX=99655 GN=BJ122_103151 PE=3 SV=1	1.47139	0.196282
tr|A0A318T8R0|A0A318T8R0_9BRAD	9BRAD	2	Succinate dehydrogenase iron-sulfur subunit OS=Rhodopseudomonas faecalis OX=99655 GN=BJ122_12267 PE=3 SV=1	0.817928	0.085164
tr|A0A318TTL1|A0A318TTL1_9BRAD	9BRAD	5	Sugar transport protein OS=Rhodopseudomonas faecalis OX=99655 GN=BJ122_109111 PE=4 SV=1	1.11918	0.590973
tr|A0A318T9V3|A0A318T9V3_9BRAD	9BRAD	3	Sulfate thiol esterase SoxB OS=Rhodopseudomonas faecalis OX=99655 GN=BJ122_11644 PE=3 SV=1	0.680617	0.0620597
tr|A0A318TL25|A0A318TL25_9BRAD	9BRAD	7	Sulfide dehydrogenase (Flavoprotein) subunit SudA /sulfide dehydrogenase (Flavoprotein) subunit SudB OS=Rhodopseudomonas faecalis OX=99655 GN=BJ122_103185 PE=4 SV=1	0.619799	0.11853
tr|A0A318TP10|A0A318TP10_9BRAD	9BRAD	4	Sulfide:quinone oxidoreductase OS=Rhodopseudomonas faecalis OX=99655 GN=BJ122_106119 PE=4 SV=1	0.767331	0.455351
tr|A0A318TBF1|A0A318TBF1_9BRAD	9BRAD	1	Sulfur compound chelating protein SoxZ OS=Rhodopseudomonas faecalis OX=99655 GN=BJ122_11645 PE=4 SV=1	1.07313	0.676434
tr|A0A318TAC0|A0A318TAC0_9BRAD	9BRAD	2	Sulfur dehydrogenase subunit SoxC OS=Rhodopseudomonas faecalis OX=99655 GN=BJ122_11643 PE=4 SV=1	1.73322	0.0821414
tr|A0A318TJ39|A0A318TJ39_9BRAD	9BRAD	3	Superoxide dismutase OS=Rhodopseudomonas faecalis OX=99655 GN=BJ122_10833 PE=3 SV=1	1.26517	0.484115
tr|A0A318TJV9|A0A318TJV9_9BRAD	9BRAD	1	Tetratricopeptide repeat protein OS=Rhodopseudomonas faecalis OX=99655 GN=BJ122_10478 PE=4 SV=1	0.8985	0.875605
tr|A0A318TBN8|A0A318TBN8_9BRAD	9BRAD	4	Thioredoxin OS=Rhodopseudomonas faecalis OX=99655 GN=BJ122_11273 PE=3 SV=1	0.226602	0.00014789
tr|A0A318TB82|A0A318TB82_9BRAD	9BRAD	1	Thiosulfate-binding protein SoxY OS=Rhodopseudomonas faecalis OX=99655 GN=BJ122_11646 PE=4 SV=1	0.579643	0.400065
tr|A0A318TGH1|A0A318TGH1_9BRAD	9BRAD	1	Threonine synthase OS=Rhodopseudomonas faecalis OX=99655 GN=BJ122_10988 PE=3 SV=1	1.46999	0.277839
tr|A0A318U0B4|A0A318U0B4_9BRAD	9BRAD	2	Threonine--tRNA ligase OS=Rhodopseudomonas faecalis OX=99655 GN=thrS PE=3 SV=1	0.179742	0.0209829
tr|A0A318T9R5|A0A318T9R5_9BRAD	9BRAD	5	Transaldolase OS=Rhodopseudomonas faecalis OX=99655 GN=tal PE=3 SV=1	0.554269	0.0299921
tr|A0A318TJ03|A0A318TJ03_9BRAD	9BRAD	1	Transcription antitermination protein NusB OS=Rhodopseudomonas faecalis OX=99655 GN=nusB PE=3 SV=1	0.685853	0.0279298
tr|A0A318TD33|A0A318TD33_9BRAD	9BRAD	4	Transcription elongation factor GreA OS=Rhodopseudomonas faecalis OX=99655 GN=greA PE=3 SV=1	1.50346	0.0232657
tr|A0A318TF29|A0A318TF29_9BRAD	9BRAD	5	Transcription termination factor Rho OS=Rhodopseudomonas faecalis OX=99655 GN=rho PE=3 SV=1	0.925048	0.709014
tr|A0A318T8L6|A0A318T8L6_9BRAD	9BRAD	8	Transcription termination/antitermination protein NusA OS=Rhodopseudomonas faecalis OX=99655 GN=nusA PE=3 SV=1	1.51647	0.14237
tr|A0A318T9C6|A0A318T9C6_9BRAD	9BRAD	3	Transcription termination/antitermination protein NusG OS=Rhodopseudomonas faecalis OX=99655 GN=nusG PE=3 SV=1	2.23799	0.031239
tr|A0A318TFE9|A0A318TFE9_9BRAD	9BRAD	4	Transketolase OS=Rhodopseudomonas faecalis OX=99655 GN=BJ122_106136 PE=3 SV=1	1.31621	0.223047
tr|A0A318TE70|A0A318TE70_9BRAD	9BRAD	1	Translation initiation factor 3 (BIF-3) OS=Rhodopseudomonas faecalis OX=99655 GN=BJ122_11412 PE=3 SV=1	1.19884	0.486337
tr|A0A318T9T6|A0A318T9T6_9BRAD	9BRAD	11	Translation initiation factor IF-2 OS=Rhodopseudomonas faecalis OX=99655 GN=infB PE=3 SV=1	1.28765	0.245492
tr|A0A318TLB3|A0A318TLB3_9BRAD	9BRAD	12	Trigger factor OS=Rhodopseudomonas faecalis OX=99655 GN=tig PE=3 SV=1	1.32997	0.026676
tr|A0A336JGK6|A0A336JGK6_9BRAD	9BRAD	1	Trigger factor OS=Rhodopseudomonas pentothenatexigens OX=999699 GN=tig PE=3 SV=1	0.172661	0.0561786
tr|A0A318TGV5|A0A318TGV5_9BRAD	9BRAD	1	Tripartite ATP-independent transporter DctP family solute receptor OS=Rhodopseudomonas faecalis OX=99655 GN=BJ122_105152 PE=3 SV=1	0.641541	0.381516
tr|A0A318TC39|A0A318TC39_9BRAD	9BRAD	6	Tripartite-type tricarboxylate transporter receptor subunit TctC OS=Rhodopseudomonas faecalis OX=99655 GN=BJ122_111102 PE=3 SV=1	1.67947	0.137471
tr|A0A318TCL0|A0A318TCL0_9BRAD	9BRAD	1	Tryptophan synthase beta chain OS=Rhodopseudomonas faecalis OX=99655 GN=trpB PE=3 SV=1	0.892209	0.732128
tr|A0A318TNC7|A0A318TNC7_9BRAD	9BRAD	3	Tryptophan synthase beta chain OS=Rhodopseudomonas faecalis OX=99655 GN=trpB PE=3 SV=1	1.40182	0.240893
tr|A0A318TK49|A0A318TK49_9BRAD	9BRAD	4	Tryptophanase OS=Rhodopseudomonas faecalis OX=99655 GN=BJ122_1067 PE=3 SV=1	1.14106	0.425864
tr|A0A318T9X4|A0A318T9X4_9BRAD	9BRAD	1	Tryptophan--tRNA ligase OS=Rhodopseudomonas faecalis OX=99655 GN=trpS PE=3 SV=1	1.09135	0.631594
tr|A0A318TNV0|A0A318TNV0_9BRAD	9BRAD	8	Tyrosine--tRNA ligase OS=Rhodopseudomonas faecalis OX=99655 GN=tyrS PE=3 SV=1	1.0695	0.381139
tr|A0A318TA75|A0A318TA75_9BRAD	9BRAD	2	Ubiquinone biosynthesis O-methyltransferase OS=Rhodopseudomonas faecalis OX=99655 GN=ubiG PE=3 SV=1	0.550059	0.00593129
tr|A0A318TDW0|A0A318TDW0_9BRAD	9BRAD	4	Ubiquinone biosynthesis protein UbiU OS=Rhodopseudomonas faecalis OX=99655 GN=ubiU PE=3 SV=1	0.945298	0.569214
tr|A0A318TEE8|A0A318TEE8_9BRAD	9BRAD	2	Ubiquinone biosynthesis protein UbiV OS=Rhodopseudomonas faecalis OX=99655 GN=ubiV PE=3 SV=1	1.26204	0.68469
tr|A0A318TBB4|A0A318TBB4_9BRAD	9BRAD	1	Ubiquinone/menaquinone biosynthesis C-methyltransferase UbiE OS=Rhodopseudomonas faecalis OX=99655 GN=ubiE PE=3 SV=1	1.1034	0.799106
tr|A0A318T8H7|A0A318T8H7_9BRAD	9BRAD	1	UDP-N-acetylmuramate--L-alanine ligase OS=Rhodopseudomonas faecalis OX=99655 GN=murC PE=3 SV=1	1.61039	0.553087
tr|A0A318TTZ6|A0A318TTZ6_9BRAD	9BRAD	1	Uncharacterized protein (DUF2147 family) OS=Rhodopseudomonas faecalis OX=99655 GN=BJ122_10834 PE=4 SV=1	0.321136	0.0439733
tr|A0A318THK8|A0A318THK8_9BRAD	9BRAD	2	Uncharacterized protein (TIGR00255 family) OS=Rhodopseudomonas faecalis OX=99655 GN=BJ122_107121 PE=4 SV=1	0.663878	0.0770621
tr|A0A318TDT0|A0A318TDT0_9BRAD	9BRAD	3	Uncharacterized protein (TIGR02284 family) OS=Rhodopseudomonas faecalis OX=99655 GN=BJ122_11090 PE=4 SV=1	0.371038	0.0502333
tr|A0A318TA03|A0A318TA03_9BRAD	9BRAD	3	Uncharacterized protein DUF2147 OS=Rhodopseudomonas faecalis OX=99655 GN=BJ122_12017 PE=4 SV=1	1.47532	0.155413
tr|A0A318TJ09|A0A318TJ09_9BRAD	9BRAD	2	Uncharacterized protein DUF2848 OS=Rhodopseudomonas faecalis OX=99655 GN=BJ122_10277 PE=4 SV=1	0.601584	0.119842
tr|A0A318TIL9|A0A318TIL9_9BRAD	9BRAD	1	Uncharacterized protein DUF2852 OS=Rhodopseudomonas faecalis OX=99655 GN=BJ122_10959 PE=4 SV=1	0.147939	0.0648022
tr|A0A318TKJ2|A0A318TKJ2_9BRAD	9BRAD	2	Uncharacterized protein DUF3126 OS=Rhodopseudomonas faecalis OX=99655 GN=BJ122_10170 PE=4 SV=1	0.315541	0.144569
tr|A0A318TG07|A0A318TG07_9BRAD	9BRAD	2	Uncharacterized protein DUF3222 OS=Rhodopseudomonas faecalis OX=99655 GN=BJ122_106131 PE=4 SV=1	0.661102	0.189016
tr|A0A318TAT7|A0A318TAT7_9BRAD	9BRAD	3	Uncharacterized protein DUF3297 OS=Rhodopseudomonas faecalis OX=99655 GN=BJ122_11816 PE=4 SV=1	1.21163	0.642156
tr|A0A318T9E7|A0A318T9E7_9BRAD	9BRAD	1	Uncharacterized protein DUF3365 OS=Rhodopseudomonas faecalis OX=99655 GN=BJ122_1255 PE=4 SV=1	0.18739	0.180102
tr|A0A318THQ3|A0A318THQ3_9BRAD	9BRAD	1	Uncharacterized protein DUF3572 OS=Rhodopseudomonas faecalis OX=99655 GN=BJ122_10764 PE=4 SV=1	0.930759	0.732892
tr|A0A336JH08|A0A336JH08_9BRAD	9BRAD	2	Uncharacterized protein DUF3597 OS=Rhodopseudomonas pentothenatexigens OX=999699 GN=SAMN05892882_101161 PE=4 SV=1	0.623694	0.0924496
tr|A0A318TP56|A0A318TP56_9BRAD	9BRAD	1	Uncharacterized protein DUF3775 OS=Rhodopseudomonas faecalis OX=99655 GN=BJ122_12213 PE=4 SV=1	0.372117	0.062836
tr|A0A318TF42|A0A318TF42_9BRAD	9BRAD	1	Uncharacterized protein DUF4261 OS=Rhodopseudomonas faecalis OX=99655 GN=BJ122_11721 PE=4 SV=1	0.175331	0.239288
tr|A0A318TR55|A0A318TR55_9BRAD	9BRAD	1	Uncharacterized protein DUF5076 OS=Rhodopseudomonas faecalis OX=99655 GN=BJ122_101261 PE=4 SV=1	0.606976	0.296839
tr|A0A318T8T1|A0A318T8T1_9BRAD	9BRAD	5	Uncharacterized protein DUF992 OS=Rhodopseudomonas faecalis OX=99655 GN=BJ122_13123 PE=4 SV=1	1.08695	0.81418
tr|A0A318TDP2|A0A318TDP2_9BRAD	9BRAD	1	Uncharacterized protein GlcG (DUF336 family) OS=Rhodopseudomonas faecalis OX=99655 GN=BJ122_11649 PE=4 SV=1	0.690454	0.327137
tr|A0A318TLP5|A0A318TLP5_9BRAD	9BRAD	1	Uncharacterized protein OS=Rhodopseudomonas faecalis OX=99655 GN=BJ122_101132 PE=4 SV=1	1.12426	0.790263
tr|A0A318TQW5|A0A318TQW5_9BRAD	9BRAD	2	Uncharacterized protein OS=Rhodopseudomonas faecalis OX=99655 GN=BJ122_101168 PE=4 SV=1	0.401562	0.00688251
tr|A0A318U0I7|A0A318U0I7_9BRAD	9BRAD	4	Uncharacterized protein OS=Rhodopseudomonas faecalis OX=99655 GN=BJ122_101169 PE=4 SV=1	1.24471	0.122091
tr|A0A318TKQ5|A0A318TKQ5_9BRAD	9BRAD	2	Uncharacterized protein OS=Rhodopseudomonas faecalis OX=99655 GN=BJ122_101204 PE=4 SV=1	0.651679	0.418191
tr|A0A318TJM1|A0A318TJM1_9BRAD	9BRAD	1	Uncharacterized protein OS=Rhodopseudomonas faecalis OX=99655 GN=BJ122_102132 PE=4 SV=1	0.232622	0.0567081
tr|A0A318TK06|A0A318TK06_9BRAD	9BRAD	4	Uncharacterized protein OS=Rhodopseudomonas faecalis OX=99655 GN=BJ122_102200 PE=4 SV=1	0.85121	0.523587
tr|A0A318TLS1|A0A318TLS1_9BRAD	9BRAD	1	Uncharacterized protein OS=Rhodopseudomonas faecalis OX=99655 GN=BJ122_10235 PE=4 SV=1	0.549483	0.144515
tr|A0A318TK80|A0A318TK80_9BRAD	9BRAD	1	Uncharacterized protein OS=Rhodopseudomonas faecalis OX=99655 GN=BJ122_102352 PE=4 SV=1	0.648622	0.289998
tr|A0A318TKA4|A0A318TKA4_9BRAD	9BRAD	1	Uncharacterized protein OS=Rhodopseudomonas faecalis OX=99655 GN=BJ122_10288 PE=4 SV=1	1.78613	0.0111446
tr|A0A318THY6|A0A318THY6_9BRAD	9BRAD	1	Uncharacterized protein OS=Rhodopseudomonas faecalis OX=99655 GN=BJ122_103114 PE=4 SV=1	0.660834	0.259738
tr|A0A318TKW4|A0A318TKW4_9BRAD	9BRAD	1	Uncharacterized protein OS=Rhodopseudomonas faecalis OX=99655 GN=BJ122_103120 PE=4 SV=1	0.134804	0.215332
tr|A0A318TIK8|A0A318TIK8_9BRAD	9BRAD	4	Uncharacterized protein OS=Rhodopseudomonas faecalis OX=99655 GN=BJ122_103178 PE=4 SV=1	0.75729	0.326239
tr|A0A318TI10|A0A318TI10_9BRAD	9BRAD	1	Uncharacterized protein OS=Rhodopseudomonas faecalis OX=99655 GN=BJ122_10319 PE=4 SV=1	0.362448	0.244237
tr|A0A318TL56|A0A318TL56_9BRAD	9BRAD	4	Uncharacterized protein OS=Rhodopseudomonas faecalis OX=99655 GN=BJ122_103225 PE=3 SV=1	0.868203	0.605649
tr|A0A318TKN1|A0A318TKN1_9BRAD	9BRAD	1	Uncharacterized protein OS=Rhodopseudomonas faecalis OX=99655 GN=BJ122_10333 PE=4 SV=1	0.547101	0.0390375
tr|A0A318TGX7|A0A318TGX7_9BRAD	9BRAD	2	Uncharacterized protein OS=Rhodopseudomonas faecalis OX=99655 GN=BJ122_104110 PE=4 SV=1	0.875405	0.542516
tr|A0A318THH9|A0A318THH9_9BRAD	9BRAD	2	Uncharacterized protein OS=Rhodopseudomonas faecalis OX=99655 GN=BJ122_104112 PE=4 SV=1	0.308921	0.0391223
tr|A0A318TWX7|A0A318TWX7_9BRAD	9BRAD	2	Uncharacterized protein OS=Rhodopseudomonas faecalis OX=99655 GN=BJ122_10497 PE=4 SV=1	1.37377	0.181451
tr|A0A318TPP8|A0A318TPP8_9BRAD	9BRAD	9	Uncharacterized protein OS=Rhodopseudomonas faecalis OX=99655 GN=BJ122_105153 PE=4 SV=1	0.873513	0.330981
tr|A0A318TIU6|A0A318TIU6_9BRAD	9BRAD	2	Uncharacterized protein OS=Rhodopseudomonas faecalis OX=99655 GN=BJ122_10517 PE=4 SV=1	0.824287	0.705482
tr|A0A318TFF6|A0A318TFF6_9BRAD	9BRAD	1	Uncharacterized protein OS=Rhodopseudomonas faecalis OX=99655 GN=BJ122_107108 PE=4 SV=1	0.590309	0.352337
tr|A0A318THK2|A0A318THK2_9BRAD	9BRAD	2	Uncharacterized protein OS=Rhodopseudomonas faecalis OX=99655 GN=BJ122_10712 PE=4 SV=1	0.867158	0.823481
tr|A0A318TE96|A0A318TE96_9BRAD	9BRAD	1	Uncharacterized protein OS=Rhodopseudomonas faecalis OX=99655 GN=BJ122_10714 PE=4 SV=1	0.496523	0.18918
tr|A0A318TFE8|A0A318TFE8_9BRAD	9BRAD	3	Uncharacterized protein OS=Rhodopseudomonas faecalis OX=99655 GN=BJ122_10798 PE=4 SV=1	0.809289	0.495303
tr|A0A318TGG7|A0A318TGG7_9BRAD	9BRAD	5	Uncharacterized protein OS=Rhodopseudomonas faecalis OX=99655 GN=BJ122_10910 PE=4 SV=1	0.596995	0.0858429
tr|A0A318TEB6|A0A318TEB6_9BRAD	9BRAD	1	Uncharacterized protein OS=Rhodopseudomonas faecalis OX=99655 GN=BJ122_10944 PE=4 SV=1	1.26012	0.513693
tr|A0A318TG94|A0A318TG94_9BRAD	9BRAD	1	Uncharacterized protein OS=Rhodopseudomonas faecalis OX=99655 GN=BJ122_1097 PE=4 SV=1	0.245135	0.301004
tr|A0A318TT93|A0A318TT93_9BRAD	9BRAD	1	Uncharacterized protein OS=Rhodopseudomonas faecalis OX=99655 GN=BJ122_1099 PE=4 SV=1	1.9815	0.081472
tr|A0A318TFY2|A0A318TFY2_9BRAD	9BRAD	3	Uncharacterized protein OS=Rhodopseudomonas faecalis OX=99655 GN=BJ122_11016 PE=3 SV=1	0.723649	0.0703809
tr|A0A318TSU4|A0A318TSU4_9BRAD	9BRAD	2	Uncharacterized protein OS=Rhodopseudomonas faecalis OX=99655 GN=BJ122_11066 PE=4 SV=1	1.05193	0.949551
tr|A0A318TI44|A0A318TI44_9BRAD	9BRAD	6	Uncharacterized protein OS=Rhodopseudomonas faecalis OX=99655 GN=BJ122_11085 PE=4 SV=1	1.58682	0.111207
tr|A0A318TSW4|A0A318TSW4_9BRAD	9BRAD	3	Uncharacterized protein OS=Rhodopseudomonas faecalis OX=99655 GN=BJ122_11086 PE=4 SV=1	0.820965	0.741005
tr|A0A318TCL6|A0A318TCL6_9BRAD	9BRAD	2	Uncharacterized protein OS=Rhodopseudomonas faecalis OX=99655 GN=BJ122_11089 PE=4 SV=1	1.01404	0.987057
tr|A0A318TDB9|A0A318TDB9_9BRAD	9BRAD	2	Uncharacterized protein OS=Rhodopseudomonas faecalis OX=99655 GN=BJ122_11173 PE=4 SV=1	1.32481	0.366804
tr|A0A318TH44|A0A318TH44_9BRAD	9BRAD	4	Uncharacterized protein OS=Rhodopseudomonas faecalis OX=99655 GN=BJ122_11269 PE=4 SV=1	0.914512	0.679505
tr|A0A318TC23|A0A318TC23_9BRAD	9BRAD	1	Uncharacterized protein OS=Rhodopseudomonas faecalis OX=99655 GN=BJ122_11338 PE=4 SV=1	2.47469	0.194804
tr|A0A318TG77|A0A318TG77_9BRAD	9BRAD	1	Uncharacterized protein OS=Rhodopseudomonas faecalis OX=99655 GN=BJ122_11453 PE=4 SV=1	0.319521	0.407742
tr|A0A318TDX8|A0A318TDX8_9BRAD	9BRAD	2	Uncharacterized protein OS=Rhodopseudomonas faecalis OX=99655 GN=BJ122_11526 PE=4 SV=1	0.656182	0.463136
tr|A0A318TAL9|A0A318TAL9_9BRAD	9BRAD	3	Uncharacterized protein OS=Rhodopseudomonas faecalis OX=99655 GN=BJ122_11530 PE=4 SV=1	1.36402	0.0286366
tr|A0A318TBK0|A0A318TBK0_9BRAD	9BRAD	1	Uncharacterized protein OS=Rhodopseudomonas faecalis OX=99655 GN=BJ122_11564 PE=4 SV=1	1.07553	0.784017
tr|A0A318TAQ2|A0A318TAQ2_9BRAD	9BRAD	2	Uncharacterized protein OS=Rhodopseudomonas faecalis OX=99655 GN=BJ122_11572 PE=4 SV=1	1.88009	0.0526651
tr|A0A318TQG9|A0A318TQG9_9BRAD	9BRAD	2	Uncharacterized protein OS=Rhodopseudomonas faecalis OX=99655 GN=BJ122_11621 PE=4 SV=1	0.976955	0.939872
tr|A0A318TEH7|A0A318TEH7_9BRAD	9BRAD	2	Uncharacterized protein OS=Rhodopseudomonas faecalis OX=99655 GN=BJ122_12061 PE=4 SV=1	0.251226	0.000851088
tr|A0A318T9X5|A0A318T9X5_9BRAD	9BRAD	1	Uncharacterized protein OS=Rhodopseudomonas faecalis OX=99655 GN=BJ122_12228 PE=4 SV=1	2.3646	0.18719
tr|A0A318TBZ3|A0A318TBZ3_9BRAD	9BRAD	2	Uncharacterized protein OS=Rhodopseudomonas faecalis OX=99655 GN=BJ122_12327 PE=4 SV=1	1.59364	0.343705
tr|A0A318TD90|A0A318TD90_9BRAD	9BRAD	1	Uncharacterized protein OS=Rhodopseudomonas faecalis OX=99655 GN=BJ122_1241 PE=4 SV=1	2.43037	0.0285021
tr|A0A318T826|A0A318T826_9BRAD	9BRAD	1	Uncharacterized protein OS=Rhodopseudomonas faecalis OX=99655 GN=BJ122_12630 PE=4 SV=1	0.80582	0.667659
tr|A0A318T916|A0A318T916_9BRAD	9BRAD	4	Uncharacterized protein OS=Rhodopseudomonas faecalis OX=99655 GN=BJ122_12739 PE=4 SV=1	7.03546	0.0926707
tr|A0A318T8W4|A0A318T8W4_9BRAD	9BRAD	1	Uncharacterized protein OS=Rhodopseudomonas faecalis OX=99655 GN=BJ122_12747 PE=4 SV=1	4.69026	0.0287392
tr|A0A318T911|A0A318T911_9BRAD	9BRAD	3	Uncharacterized protein OS=Rhodopseudomonas faecalis OX=99655 GN=BJ122_12816 PE=4 SV=1	0.846575	0.751148
tr|A0A318TGP6|A0A318TGP6_9BRAD	9BRAD	1	Uncharacterized protein OS=Rhodopseudomonas faecalis OX=99655 GN=BJ122_13115 PE=4 SV=1	0.748965	0.676784
tr|A0A318TB31|A0A318TB31_9BRAD	9BRAD	1	Uncharacterized protein OS=Rhodopseudomonas faecalis OX=99655 GN=BJ122_1317 PE=4 SV=1	2.01569	0.00668193
tr|A0A318T8D1|A0A318T8D1_9BRAD	9BRAD	1	Uncharacterized protein OS=Rhodopseudomonas faecalis OX=99655 GN=BJ122_13217 PE=4 SV=1	1.09175	0.80488
tr|A0A318T8E7|A0A318T8E7_9BRAD	9BRAD	2	Uncharacterized protein OS=Rhodopseudomonas faecalis OX=99655 GN=BJ122_13312 PE=4 SV=1	1.19892	0.523619
tr|A0A318T7Z9|A0A318T7Z9_9BRAD	9BRAD	2	Uncharacterized protein OS=Rhodopseudomonas faecalis OX=99655 GN=BJ122_13915 PE=4 SV=1	0.595051	0.361247
tr|A0A318TMG1|A0A318TMG1_9BRAD	9BRAD	1	Uncharacterized protein OS=Rhodopseudomonas faecalis OX=99655 GN=BJ122_1403 PE=4 SV=1	1.12328	0.67897
tr|A0A318TAD2|A0A318TAD2_9BRAD	9BRAD	3	Uncharacterized protein OS=Rhodopseudomonas faecalis OX=99655 GN=BJ122_1602 PE=4 SV=1	1.89286	0.00206358
tr|A0A0N0KDB7|A0A0N0KDB7_9BRAD	9BRAD	1	Uncharacterized protein OS=Rhodopseudomonas sp. AAP120 OX=1523430 GN=IP86_26345 PE=4 SV=1	0.0831651	0.123258
tr|A0A318T7W7|A0A318T7W7_9BRAD	9BRAD	1	Uncharacterized protein YidB (DUF937 family) OS=Rhodopseudomonas faecalis OX=99655 GN=BJ122_12525 PE=4 SV=1	0.38959	0.190677
tr|A0A318TAQ9|A0A318TAQ9_9BRAD	9BRAD	2	Uncharacterized protein YjbJ (UPF0337 family) OS=Rhodopseudomonas faecalis OX=99655 GN=BJ122_11582 PE=3 SV=1	0.959217	0.954313
tr|A0A318THU0|A0A318THU0_9BRAD	9BRAD	2	Uncharacterized protein YjbJ (UPF0337 family) OS=Rhodopseudomonas faecalis OX=99655 GN=BJ122_1229 PE=3 SV=1	1.24469	0.351235
tr|A0A318TFS8|A0A318TFS8_9BRAD	9BRAD	3	Universal stress protein family protein OS=Rhodopseudomonas faecalis OX=99655 GN=BJ122_11558 PE=3 SV=1	0.362014	0.0195986
tr|A0A318TDD9|A0A318TDD9_9BRAD	9BRAD	6	Uroporphyrinogen decarboxylase OS=Rhodopseudomonas faecalis OX=99655 GN=hemE PE=3 SV=1	2.48651	0.0171245
tr|A0A318TDH0|A0A318TDH0_9BRAD	9BRAD	2	Uroporphyrinogen-III synthase OS=Rhodopseudomonas faecalis OX=99655 GN=BJ122_11622 PE=3 SV=1	1.15862	0.748777
tr|A0A318TRQ0|A0A318TRQ0_9BRAD	9BRAD	2	UTP--glucose-1-phosphate uridylyltransferase OS=Rhodopseudomonas faecalis OX=99655 GN=BJ122_103240 PE=3 SV=1	0.747301	0.0897154
tr|A0A318TDF8|A0A318TDF8_9BRAD	9BRAD	4	Valine--tRNA ligase OS=Rhodopseudomonas faecalis OX=99655 GN=valS PE=3 SV=1	0.367279	0.0320517
tr|A0A318TCI4|A0A318TCI4_9BRAD	9BRAD	1	Winged helix family two component transcriptional regulator OS=Rhodopseudomonas faecalis OX=99655 GN=BJ122_11286 PE=4 SV=1	0.2627	0.170502
tr|A0A318T6U8|A0A318T6U8_9BRAD	9BRAD	8	Xanthine dehydrogenase molybdenum binding subunit apoprotein OS=Rhodopseudomonas faecalis OX=99655 GN=BJ122_13620 PE=4 SV=1	0.875539	0.512907
tr|A0A318TPD6|A0A318TPD6_9BRAD	9BRAD	1	Xre family transcriptional regulator OS=Rhodopseudomonas faecalis OX=99655 GN=BJ122_12129 PE=4 SV=1	0.984957	0.976064

## Sheet: R. capsulatus
ID_PROT	species	# peptides	Name	0,8V/0V norm	p value
tr|A0A7H0XUY6|A0A7H0XUY6_RHOCA	RHOCA	1	Phosphoenolpyruvate carboxykinase (ATP) OS=Rhodobacter capsulatus OX=1061 GN=pckA PE=3 SV=1	1.68544	0.413517
tr|A0A7H0XTV9|A0A7H0XTV9_RHOCA	RHOCA	1	Pyruvate carboxylase OS=Rhodobacter capsulatus OX=1061 GN=H9N28_11845 PE=4 SV=1	2.12417	0.0599411
tr|A0A7H0Y0E2|A0A7H0Y0E2_RHOCA	RHOCA	2	Fructose-1,6-bisphosphatase class 1 OS=Rhodobacter capsulatus OX=1061 GN=fbp PE=3 SV=1	0.369467	0.256525
tr|A0A7H0Y0D8|A0A7H0Y0D8_RHOCA	RHOCA	1	Fructose-1,6-bisphosphate aldolase OS=Rhodobacter capsulatus OX=1061 GN=H9N28_06900 PE=3 SV=1	1.36002	0.710577
tr|A0A7H0Y0R0|A0A7H0Y0R0_RHOCA	RHOCA	5	Fructose-bisphosphate aldolase class I OS=Rhodobacter capsulatus OX=1061 GN=H9N28_07605 PE=3 SV=1	1.48269	0.311043
tr|A0A1G7HQ19|A0A1G7HQ19_RHOCA	RHOCA	3	Enolase OS=Rhodobacter capsulatus OX=1061 GN=eno PE=3 SV=1	0.782937	0.362515
tr|A0A7H0Y1G6|A0A7H0Y1G6_RHOCA	RHOCA	3	Cytochrome c family protein OS=Rhodobacter capsulatus OX=1061 GN=H9N28_10375 PE=4 SV=1	0.872127	0.280033
tr|A0A4U1JPF3|A0A4U1JPF3_RHOCA	RHOCA	1	Cytochrome C OS=Rhodobacter capsulatus OX=1061 GN=FBT96_12140 PE=4 SV=1	0.956572	0.932491
tr|A0A7H0XUS3|A0A7H0XUS3_RHOCA	RHOCA	4	Cytochrome c1 OS=Rhodobacter capsulatus OX=1061 GN=H9N28_13620 PE=4 SV=1	1.29733	0.0234587
tr|A0A0Q0QW64|A0A0Q0QW64_RHOCA	RHOCA	1	Cytochrome c556 OS=Rhodobacter capsulatus OX=1061 GN=SAMN04244550_02505 PE=4 SV=1	10.497	0.0303869
tr|A0A0N8VFT4|A0A0N8VFT4_RHOCA	RHOCA	7	Photosynthetic reaction center H subunit OS=Rhodobacter capsulatus OX=1061 GN=SAMN04244550_01231 PE=4 SV=1	1.11244	0.610442
tr|A0A7H0XXE9|A0A7H0XXE9_RHOCA	RHOCA	5	Porin OS=Rhodobacter capsulatus OX=1061 GN=H9N28_01315 PE=4 SV=1	1.16815	0.707085
tr|A0A7H0XVR5|A0A7H0XVR5_RHOCA	RHOCA	1	Acetyl-CoA C-acetyltransferase OS=Rhodobacter capsulatus OX=1061 GN=H9N28_15470 PE=3 SV=1	0.651625	0.0387095
tr|A0A4U1JQT2|A0A4U1JQT2_RHOCA	RHOCA	3	Phasin OS=Rhodobacter capsulatus OX=1061 GN=FBT96_09725 PE=4 SV=1	0.620036	0.0680623
tr|A0A7H0XTN7|A0A7H0XTN7_RHOCA	RHOCA	6	Isocitrase OS=Rhodobacter capsulatus OX=1061 GN=H9N28_11425 PE=4 SV=1	0.707509	0.262339
tr|A0A4V5PP73|A0A4V5PP73_RHOCA	RHOCA	2	Malate dehydrogenase OS=Rhodobacter capsulatus OX=1061 GN=mdh PE=3 SV=1	1.10675	0.827052
tr|A0A1G7PCR9|A0A1G7PCR9_RHOCA	RHOCA	1	Malate synthase OS=Rhodobacter capsulatus OX=1061 GN=SAMN04244550_02939 PE=3 SV=1	0.278678	0.153875
tr|A0A7H0XYR5|A0A7H0XYR5_RHOCA	RHOCA	5	Succinate--CoA ligase [ADP-forming] subunit beta OS=Rhodobacter capsulatus OX=1061 GN=sucC PE=3 SV=1	0.718064	0.175302
tr|A0A1G7PDP7|A0A1G7PDP7_RHOCA	RHOCA	2	2-methylcitrate dehydratase OS=Rhodobacter capsulatus OX=1061 GN=SAMN04244550_02949 PE=3 SV=1	0.989368	0.981608
tr|A0A7H0XX24|A0A7H0XX24_RHOCA	RHOCA	1	3'(2'),5'-bisphosphate nucleotidase CysQ OS=Rhodobacter capsulatus OX=1061 GN=cysQ PE=3 SV=1	1.4791	0.244734
tr|A0A7H0Y1I7|A0A7H0Y1I7_RHOCA	RHOCA	6	30S ribosomal protein S1 OS=Rhodobacter capsulatus OX=1061 GN=rpsA PE=3 SV=1	2.51703	0.0195401
tr|A0A0Q0VIT1|A0A0Q0VIT1_RHOCA	RHOCA	1	30S ribosomal protein S2 OS=Rhodobacter capsulatus OX=1061 GN=rpsB PE=3 SV=1	0.903651	0.857414
tr|A0A0Q0WBR2|A0A0Q0WBR2_RHOCA	RHOCA	3	30S ribosomal protein S4 OS=Rhodobacter capsulatus OX=1061 GN=rpsD PE=3 SV=1	1.41613	0.0655656
tr|A0A0Q0QM60|A0A0Q0QM60_RHOCA	RHOCA	1	30S ribosomal protein S6 OS=Rhodobacter capsulatus OX=1061 GN=rpsF PE=3 SV=1	1.63065	0.114391
tr|A0A7H0XVB3|A0A7H0XVB3_RHOCA	RHOCA	1	3-hydroxy-5-phosphonooxypentane-2,4-dione thiolase OS=Rhodobacter capsulatus OX=1061 GN=lsrF PE=4 SV=1	1.12425	0.787754
tr|A0A7H0XWY1|A0A7H0XWY1_RHOCA	RHOCA	1	3-isopropylmalate dehydratase large subunit OS=Rhodobacter capsulatus OX=1061 GN=leuC PE=3 SV=1	0.637822	0.349819
tr|A0A7H0XXK9|A0A7H0XXK9_RHOCA	RHOCA	3	50S ribosomal protein L15 OS=Rhodobacter capsulatus OX=1061 GN=rplO PE=3 SV=1	1.92582	0.0874989
tr|A0A0Q0V973|A0A0Q0V973_RHOCA	RHOCA	2	50S ribosomal protein L16 OS=Rhodobacter capsulatus OX=1061 GN=rplP PE=3 SV=1	1.77347	0.15517
tr|A0A4U1JNK5|A0A4U1JNK5_RHOCA	RHOCA	1	50S ribosomal protein L18 OS=Rhodobacter capsulatus OX=1061 GN=rplR PE=3 SV=1	1.41596	0.0631222
tr|A0A4V5PNY6|A0A4V5PNY6_RHOCA	RHOCA	2	50S ribosomal protein L23 OS=Rhodobacter capsulatus OX=1061 GN=rplW PE=3 SV=1	0.701499	0.155951
tr|A0A0Q0UF27|A0A0Q0UF27_RHOCA	RHOCA	1	50S ribosomal protein L28 OS=Rhodobacter capsulatus OX=1061 GN=rpmB PE=3 SV=1	0.176408	0.00198171
tr|A0A0N8VEZ1|A0A0N8VEZ1_RHOCA	RHOCA	2	50S ribosomal protein L3 OS=Rhodobacter capsulatus OX=1061 GN=rplC PE=3 SV=1	2.96322	0.00768148
tr|A0A1G7FVM3|A0A1G7FVM3_RHOCA	RHOCA	2	50S ribosomal protein L6 OS=Rhodobacter capsulatus OX=1061 GN=rplF PE=3 SV=1	0.26826	0.0263382
tr|A0A0Q0W7Q2|A0A0Q0W7Q2_RHOCA	RHOCA	1	50S ribosomal protein L7/L12 OS=Rhodobacter capsulatus OX=1061 GN=rplL PE=3 SV=1	1.7345	0.337414
tr|A0A0Q0QY72|A0A0Q0QY72_RHOCA	RHOCA	1	5-aminolevulinate synthase OS=Rhodobacter capsulatus OX=1061 GN=SAMN04244550_03519 PE=3 SV=1	0.833998	0.689226
tr|A0A4U1JWS3|A0A4U1JWS3_RHOCA	RHOCA	4	60 kDa chaperonin OS=Rhodobacter capsulatus OX=1061 GN=groL PE=3 SV=1	1.93797	0.11445
tr|A0A7H0Y0F8|A0A7H0Y0F8_RHOCA	RHOCA	4	ABC transporter substrate-binding protein OS=Rhodobacter capsulatus OX=1061 GN=H9N28_07010 PE=4 SV=1	2.10557	0.131848
tr|A0A7H0Y1G8|A0A7H0Y1G8_RHOCA	RHOCA	1	ABC transporter substrate-binding protein OS=Rhodobacter capsulatus OX=1061 GN=H9N28_10480 PE=4 SV=1	0.293536	0.0224786
tr|A0A7H0XTG4|A0A7H0XTG4_RHOCA	RHOCA	1	ABC transporter substrate-binding protein OS=Rhodobacter capsulatus OX=1061 GN=H9N28_11000 PE=3 SV=1	1.9734	0.0169285
tr|A0A7H0XVR6|A0A7H0XVR6_RHOCA	RHOCA	3	Acetoacetyl-CoA reductase OS=Rhodobacter capsulatus OX=1061 GN=phbB PE=3 SV=1	0.734005	0.0955259
tr|A0A7H0XZN9|A0A7H0XZN9_RHOCA	RHOCA	2	Acetolactate synthase OS=Rhodobacter capsulatus OX=1061 GN=H9N28_05540 PE=3 SV=1	0.693204	0.471468
tr|A0A7H0XV08|A0A7H0XV08_RHOCA	RHOCA	3	Acetyl-coenzyme A synthetase OS=Rhodobacter capsulatus OX=1061 GN=acs PE=3 SV=1	0.990339	0.975016
tr|A0A7H0XS63|A0A7H0XS63_RHOCA	RHOCA	1	Aconitate hydratase OS=Rhodobacter capsulatus OX=1061 GN=acnA PE=3 SV=1	0.163987	0.0509061
tr|A0A0Q0VD10|A0A0Q0VD10_RHOCA	RHOCA	4	Adenosylhomocysteinase OS=Rhodobacter capsulatus OX=1061 GN=ahcY PE=3 SV=1	1.71677	0.0479529
tr|A0A7H0XXL1|A0A7H0XXL1_RHOCA	RHOCA	1	Adenylate kinase OS=Rhodobacter capsulatus OX=1061 GN=adk PE=3 SV=1	1.61477	0.349363
tr|A0A4U1JLV9|A0A4U1JLV9_RHOCA	RHOCA	1	Adenylosuccinate synthetase OS=Rhodobacter capsulatus OX=1061 GN=purA PE=3 SV=1	2.67969	0.00438319
tr|A0A1G7FDY8|A0A1G7FDY8_RHOCA	RHOCA	1	Alanine dehydrogenase OS=Rhodobacter capsulatus OX=1061 GN=SAMN04244550_00953 PE=3 SV=1	3.77927	0.0173484
tr|A0A7H0XXM3|A0A7H0XXM3_RHOCA	RHOCA	5	Amino acid ABC transporter substrate-binding protein OS=Rhodobacter capsulatus OX=1061 GN=H9N28_01700 PE=3 SV=1	1.37525	0.422778
tr|A0A0Q0QTT8|A0A0Q0QTT8_RHOCA	RHOCA	1	Anaerobic Mg-protoporphyrin IX monomethyl ester oxidative cyclase OS=Rhodobacter capsulatus OX=1061 GN=SAMN04244550_01241 PE=4 SV=1	0.841935	0.731697
tr|A0A7H0Y186|A0A7H0Y186_RHOCA	RHOCA	2	Arginine biosynthesis bifunctional protein ArgJ OS=Rhodobacter capsulatus OX=1061 GN=argJ PE=3 SV=1	0.703497	0.461789
tr|A0A7H0XXA1|A0A7H0XXA1_RHOCA	RHOCA	2	Argininosuccinate synthase OS=Rhodobacter capsulatus OX=1061 GN=argG PE=3 SV=1	1.03378	0.878094
tr|A0A7H0XWB2|A0A7H0XWB2_RHOCA	RHOCA	1	Aspartate/tyrosine/aromatic aminotransferase OS=Rhodobacter capsulatus OX=1061 GN=H9N28_16545 PE=3 SV=1	0.729898	0.721654
tr|A0A4U1JMS5|A0A4U1JMS5_RHOCA	RHOCA	1	Aspartate--tRNA(Asp/Asn) ligase OS=Rhodobacter capsulatus OX=1061 GN=aspS PE=3 SV=1	0.648555	0.397236
tr|A0A7H0XV71|A0A7H0XV71_RHOCA	RHOCA	1	ATP synthase epsilon chain OS=Rhodobacter capsulatus OX=1061 GN=atpC PE=3 SV=1	1.80007	0.0137657
tr|A0A0Q0QMK5|A0A0Q0QMK5_RHOCA	RHOCA	3	ATP synthase gamma chain OS=Rhodobacter capsulatus OX=1061 GN=atpG PE=3 SV=1	2.07379	0.0579369
tr|A0A0Q0QUZ8|A0A0Q0QUZ8_RHOCA	RHOCA	1	ATP synthase subunit beta OS=Rhodobacter capsulatus OX=1061 GN=atpD PE=3 SV=1	5.16024	0.0373615
tr|A0A7H0XV75|A0A7H0XV75_RHOCA	RHOCA	2	ATP synthase subunit delta OS=Rhodobacter capsulatus OX=1061 GN=atpH PE=3 SV=1	1.99276	0.0551069
tr|A0A0Q0UCL4|A0A0Q0UCL4_RHOCA	RHOCA	1	ATP-dependent zinc metalloprotease FtsH OS=Rhodobacter capsulatus OX=1061 GN=ftsH PE=3 SV=1	0.853416	0.81935
tr|A0A0N8VEF9|A0A0N8VEF9_RHOCA	RHOCA	2	Bacterioferritin OS=Rhodobacter capsulatus OX=1061 GN=SAMN04244550_01805 PE=3 SV=1	0.94739	0.836504
tr|A0A7H0XUH9|A0A7H0XUH9_RHOCA	RHOCA	1	Beta-ketoacyl-ACP synthase I OS=Rhodobacter capsulatus OX=1061 GN=fabB PE=3 SV=1	0.892454	0.826463
tr|A0A7H0XXG1|A0A7H0XXG1_RHOCA	RHOCA	1	Bifunctional purine biosynthesis protein PurH OS=Rhodobacter capsulatus OX=1061 GN=purH PE=3 SV=1	0.185564	0.083536
tr|A0A7H0XYX8|A0A7H0XYX8_RHOCA	RHOCA	4	BMP family ABC transporter substrate-binding protein OS=Rhodobacter capsulatus OX=1061 GN=H9N28_04130 PE=4 SV=1	1.85737	0.015992
tr|A0A7H0XVW3|A0A7H0XVW3_RHOCA	RHOCA	3	BMP family ABC transporter substrate-binding protein OS=Rhodobacter capsulatus OX=1061 GN=H9N28_15735 PE=3 SV=1	0.59109	0.0832199
tr|A0A1G7KLF3|A0A1G7KLF3_RHOCA	RHOCA	1	Branched-chain-amino-acid aminotransferase OS=Rhodobacter capsulatus OX=1061 GN=ilvE PE=3 SV=1	0.203484	0.165211
tr|A0A0Q0VHT0|A0A0Q0VHT0_RHOCA	RHOCA	2	Chaperone protein DnaK OS=Rhodobacter capsulatus OX=1061 GN=dnaK PE=2 SV=1	2.21999	0.00197841
tr|A0A0Q0WES2|A0A0Q0WES2_RHOCA	RHOCA	2	Citrate synthase OS=Rhodobacter capsulatus OX=1061 GN=SAMN04244550_00335 PE=3 SV=1	1.02819	0.960669
tr|A0A7H0XX61|A0A7H0XX61_RHOCA	RHOCA	1	Complex I NDUFA9 subunit family protein OS=Rhodobacter capsulatus OX=1061 GN=H9N28_00850 PE=4 SV=1	1.34934	0.499634
tr|A0A0Q0QKD4|A0A0Q0QKD4_RHOCA	RHOCA	1	Crotonyl-CoA carboxylase/reductase OS=Rhodobacter capsulatus OX=1061 GN=SAMN04244550_00023 PE=4 SV=1	0.518929	0.259405
tr|A0A7H0XWH4|A0A7H0XWH4_RHOCA	RHOCA	4	D-3-phosphoglycerate dehydrogenase OS=Rhodobacter capsulatus OX=1061 GN=H9N28_16875 PE=3 SV=1	0.870323	0.707768
tr|A0A4V5PRB7|A0A4V5PRB7_RHOCA	RHOCA	1	Dihydrolipoyl dehydrogenase OS=Rhodobacter capsulatus OX=1061 GN=lpdA PE=3 SV=1	0.244679	0.310856
tr|A0A7H0XYS0|A0A7H0XYS0_RHOCA	RHOCA	2	Dihydrolipoyllysine-residue succinyltransferase component of 2-oxoglutarate dehydrogenase complex OS=Rhodobacter capsulatus OX=1061 GN=odhB PE=3 SV=1	0.792951	0.640011
tr|A0A0Q0QK62|A0A0Q0QK62_RHOCA	RHOCA	3	DNA-binding protein H-NS OS=Rhodobacter capsulatus OX=1061 GN=SAMN04244550_00764 PE=3 SV=1	0.775349	0.274324
tr|A0A7H0XXH9|A0A7H0XXH9_RHOCA	RHOCA	4	DNA-directed RNA polymerase subunit beta OS=Rhodobacter capsulatus OX=1061 GN=rpoB PE=3 SV=1	0.631033	0.267919
tr|A0A4U1JS31|A0A4U1JS31_RHOCA	RHOCA	2	DNA-directed RNA polymerase subunit beta' OS=Rhodobacter capsulatus OX=1061 GN=rpoC PE=3 SV=1	0.39078	0.000490012
tr|A0A0Q0UJY1|A0A0Q0UJY1_RHOCA	RHOCA	1	DNA-directed RNA polymerase subunit omega OS=Rhodobacter capsulatus OX=1061 GN=rpoZ PE=3 SV=1	1.29622	0.55166
tr|A0A7H0XXB9|A0A7H0XXB9_RHOCA	RHOCA	2	DsbA family protein OS=Rhodobacter capsulatus OX=1061 GN=H9N28_01165 PE=4 SV=1	0.514107	0.442902
tr|A0A7H0Y055|A0A7H0Y055_RHOCA	RHOCA	1	DsbA family protein OS=Rhodobacter capsulatus OX=1061 GN=H9N28_06465 PE=4 SV=1	0.603345	0.263319
tr|A0A7H0Y1L2|A0A7H0Y1L2_RHOCA	RHOCA	1	DUF1611 domain-containing protein OS=Rhodobacter capsulatus OX=1061 GN=H9N28_15395 PE=4 SV=1	0.889329	0.82194
tr|A0A7H0XWV4|A0A7H0XWV4_RHOCA	RHOCA	2	DUF2125 domain-containing protein OS=Rhodobacter capsulatus OX=1061 GN=H9N28_00245 PE=4 SV=1	1.72335	0.298593
tr|A0A7H0Y1H3|A0A7H0Y1H3_RHOCA	RHOCA	1	DUF4198 domain-containing protein OS=Rhodobacter capsulatus OX=1061 GN=H9N28_10975 PE=4 SV=1	1.29646	0.45128
tr|A0A1G7ECU3|A0A1G7ECU3_RHOCA	RHOCA	8	D-xylose transport system substrate-binding protein OS=Rhodobacter capsulatus OX=1061 GN=SAMN04244550_00736 PE=4 SV=1	2.26803	0.0448065
tr|A0A0Q0WGA1|A0A0Q0WGA1_RHOCA	RHOCA	2	Electron transfer flavoprotein beta subunit OS=Rhodobacter capsulatus OX=1061 GN=FBT96_00060 PE=3 SV=1	1.55119	0.216974
tr|A0A7H0XX43|A0A7H0XX43_RHOCA	RHOCA	2	Electron transfer flavoprotein subunit alpha/FixB family protein OS=Rhodobacter capsulatus OX=1061 GN=H9N28_00730 PE=3 SV=1	2.11695	0.146508
tr|A0A7H0XXI4|A0A7H0XXI4_RHOCA	RHOCA	3	Elongation factor G OS=Rhodobacter capsulatus OX=1061 GN=fusA PE=3 SV=1	1.36291	0.0408875
tr|A0A1G7JXI9|A0A1G7JXI9_RHOCA	RHOCA	2	Elongation factor G OS=Rhodobacter capsulatus OX=1061 GN=SAMN04244550_01997 PE=3 SV=1	1.60815	0.252481
tr|A0A7H0XX47|A0A7H0XX47_RHOCA	RHOCA	6	Elongation factor Tu OS=Rhodobacter capsulatus OX=1061 GN=tuf PE=3 SV=1	1.26701	0.588979
tr|A0A0Q0VIF7|A0A0Q0VIF7_RHOCA	RHOCA	2	Erythritol transport system substrate-binding protein OS=Rhodobacter capsulatus OX=1061 GN=SAMN04244550_02480 PE=4 SV=1	2.15854	0.0164639
tr|A0A7H0XUX7|A0A7H0XUX7_RHOCA	RHOCA	1	Fumarate hydratase class II OS=Rhodobacter capsulatus OX=1061 GN=fumC PE=3 SV=1	1.4327	0.548572
tr|A0A0Q0QM51|A0A0Q0QM51_RHOCA	RHOCA	2	Glutamine synthetase OS=Rhodobacter capsulatus OX=1061 GN=SAMN04244550_01569 PE=3 SV=1	3.24785	0.00687626
tr|A0A0Q0UDF3|A0A0Q0UDF3_RHOCA	RHOCA	6	Glyceraldehyde-3-phosphate dehydrogenase OS=Rhodobacter capsulatus OX=1061 GN=SAMN04244550_00528 PE=3 SV=1	0.771774	0.31525
tr|A0A0Q0UEJ4|A0A0Q0UEJ4_RHOCA	RHOCA	4	Glycine betaine/proline transport system substrate-binding protein OS=Rhodobacter capsulatus OX=1061 GN=SAMN04244550_01787 PE=4 SV=1	0.866138	0.464985
tr|A0A0N8VFD2|A0A0N8VFD2_RHOCA	RHOCA	1	HemY protein OS=Rhodobacter capsulatus OX=1061 GN=SAMN04244550_00697 PE=4 SV=1	0.680063	0.345015
tr|A0A7H0XW65|A0A7H0XW65_RHOCA	RHOCA	2	Homocysteine S-methyltransferase family protein OS=Rhodobacter capsulatus OX=1061 GN=H9N28_16270 PE=4 SV=1	0.529005	0.152455
tr|A0A7H0Y045|A0A7H0Y045_RHOCA	RHOCA	1	Inosine-5'-monophosphate dehydrogenase OS=Rhodobacter capsulatus OX=1061 GN=guaB PE=3 SV=1	1.05091	0.942619
tr|A0A0Q0WHM1|A0A0Q0WHM1_RHOCA	RHOCA	1	Integration host factor subunit beta OS=Rhodobacter capsulatus OX=1061 GN=ihfB PE=3 SV=1	1.58659	0.457203
tr|A0A7H0Y0H4|A0A7H0Y0H4_RHOCA	RHOCA	3	Invasion associated locus B family protein OS=Rhodobacter capsulatus OX=1061 GN=H9N28_07095 PE=4 SV=1	1.16816	0.57631
tr|A0A7H0Y0T8|A0A7H0Y0T8_RHOCA	RHOCA	1	Malonyl CoA-acyl carrier protein transacylase OS=Rhodobacter capsulatus OX=1061 GN=fabD PE=3 SV=1	0.32314	0.0141312
tr|A0A7H0XT69|A0A7H0XT69_RHOCA	RHOCA	1	Methyltransferase domain-containing protein OS=Rhodobacter capsulatus OX=1061 GN=H9N28_10465 PE=4 SV=1	0.327026	0.109323
tr|A0A7H0XYR1|A0A7H0XYR1_RHOCA	RHOCA	1	NAD(P) transhydrogenase subunit alpha OS=Rhodobacter capsulatus OX=1061 GN=H9N28_03775 PE=3 SV=1	1.06268	0.888641
tr|A0A0Q0QHC9|A0A0Q0QHC9_RHOCA	RHOCA	1	NAD(P)-dependent dehydrogenase, short-chain alcohol dehydrogenase family OS=Rhodobacter capsulatus OX=1061 GN=SAMN04244550_01019 PE=3 SV=1	3.6901	0.00437549
tr|A0A4U1JPV4|A0A4U1JPV4_RHOCA	RHOCA	2	NAD-dependent succinate-semialdehyde dehydrogenase OS=Rhodobacter capsulatus OX=1061 GN=FBT96_11435 PE=3 SV=1	1.8045	0.0227507
tr|A0A7H0XYW1|A0A7H0XYW1_RHOCA	RHOCA	3	Nickel-dependent hydrogenase large subunit OS=Rhodobacter capsulatus OX=1061 GN=H9N28_04040 PE=3 SV=1	0.209015	0.387178
tr|A0A0Q0VG84|A0A0Q0VG84_RHOCA	RHOCA	1	Nucleotide-binding universal stress protein, UspA family OS=Rhodobacter capsulatus OX=1061 GN=SAMN04244550_01282 PE=3 SV=1	2.11084	0.143621
tr|A0A0Q1A094|A0A0Q1A094_RHOCA	RHOCA	1	NYN domain-containing protein OS=Rhodobacter capsulatus OX=1061 GN=FBT96_00155 PE=4 SV=1	0.430034	0.131449
tr|A0A7H0XU39|A0A7H0XU39_RHOCA	RHOCA	3	OmpA family protein OS=Rhodobacter capsulatus OX=1061 GN=H9N28_12295 PE=4 SV=1	0.421724	0.00747965
tr|A0A0Q0QY99|A0A0Q0QY99_RHOCA	RHOCA	1	Orotidine 5'-phosphate decarboxylase OS=Rhodobacter capsulatus OX=1061 GN=pyrF PE=3 SV=1	0.433266	0.404695
tr|A0A7H0XZW6|A0A7H0XZW6_RHOCA	RHOCA	2	Outer membrane protein assembly factor BamA OS=Rhodobacter capsulatus OX=1061 GN=bamA PE=3 SV=1	0.896478	0.204041
tr|A0A4U1K2W5|A0A4U1K2W5_RHOCA	RHOCA	1	Parvulin-like PPIase OS=Rhodobacter capsulatus OX=1061 GN=FBT96_00760 PE=3 SV=1	0.208047	0.0442927
tr|A0A7H0XXB0|A0A7H0XXB0_RHOCA	RHOCA	1	Parvulin-like PPIase OS=Rhodobacter capsulatus OX=1061 GN=H9N28_01120 PE=3 SV=1	0.618139	0.484495
tr|A0A4U1JRP9|A0A4U1JRP9_RHOCA	RHOCA	2	Peptidoglycan-associated protein OS=Rhodobacter capsulatus OX=1061 GN=pal PE=3 SV=1	1.01204	0.966784
tr|A0A0Q0QM20|A0A0Q0QM20_RHOCA	RHOCA	1	Peptidyl-prolyl cis-trans isomerase OS=Rhodobacter capsulatus OX=1061 GN=SAMN04244550_01537 PE=3 SV=1	0.660173	0.128189
tr|A0A7H0XSU0|A0A7H0XSU0_RHOCA	RHOCA	2	Periplasmic serine endoprotease DegP-like OS=Rhodobacter capsulatus OX=1061 GN=H9N28_09760 PE=3 SV=1	1.36619	0.377847
tr|A0A0Q0QVZ0|A0A0Q0QVZ0_RHOCA	RHOCA	2	Phosphoglycerate kinase OS=Rhodobacter capsulatus OX=1061 GN=pgk PE=3 SV=1	0.883162	0.692269
tr|A0A4U1JNG4|A0A4U1JNG4_RHOCA	RHOCA	1	Phosphoribosylaminoimidazole-succinocarboxamide synthase OS=Rhodobacter capsulatus OX=1061 GN=purC PE=3 SV=1	1.37964	0.247521
tr|A0A0Q0WMJ9|A0A0Q0WMJ9_RHOCA	RHOCA	1	Phosphoribulokinase OS=Rhodobacter capsulatus OX=1061 GN=SAMN04244550_01411 PE=3 SV=1	0.33992	0.260855
tr|A0A0E2PGB4|A0A0E2PGB4_RHOCA	RHOCA	2	Phytoene dehydrogenase OS=Rhodobacter capsulatus Y262 OX=1415161 GN=U715_04590 PE=3 SV=1	2.3923	0.000766343
tr|A0A7H0Y188|A0A7H0Y188_RHOCA	RHOCA	9	Polyribonucleotide nucleotidyltransferase OS=Rhodobacter capsulatus OX=1061 GN=pnp PE=3 SV=1	0.879844	0.572562
tr|Q9AKR9|Q9AKR9_RHOCA	RHOCA	2	Porphobilinogen deaminase OS=Rhodobacter capsulatus OX=1061 GN=hemC PE=3 SV=1	1.11948	0.625119
tr|A0A0Q0UMD7|A0A0Q0UMD7_RHOCA	RHOCA	2	Predicted lipid-binding transport protein, Tim44 family OS=Rhodobacter capsulatus OX=1061 GN=SAMN04244550_00749 PE=4 SV=1	0.955408	0.863768
tr|A0A4U1JS52|A0A4U1JS52_RHOCA	RHOCA	1	Probable transaldolase OS=Rhodobacter capsulatus OX=1061 GN=fsa PE=3 SV=1	1.17582	0.663983
tr|A0A7H0XT06|A0A7H0XT06_RHOCA	RHOCA	2	Proline--tRNA ligase OS=Rhodobacter capsulatus OX=1061 GN=proS PE=3 SV=1	1.24146	0.454548
tr|A0A4U1JMT6|A0A4U1JMT6_RHOCA	RHOCA	3	Protein HflC OS=Rhodobacter capsulatus OX=1061 GN=FBT96_15505 PE=3 SV=1	0.27303	0.126332
tr|A0A7H0XST7|A0A7H0XST7_RHOCA	RHOCA	2	Protein HflK OS=Rhodobacter capsulatus OX=1061 GN=hflK PE=3 SV=1	0.752406	0.283173
tr|A0A1G7KVB9|A0A1G7KVB9_RHOCA	RHOCA	2	Putative hydroxymethylpyrimidine transport system substrate-binding protein OS=Rhodobacter capsulatus OX=1061 GN=SAMN04244550_02220 PE=4 SV=1	1.86359	0.315749
tr|A0A1G7N8A1|A0A1G7N8A1_RHOCA	RHOCA	4	Putative spermidine/putrescine transport system substrate-binding protein OS=Rhodobacter capsulatus OX=1061 GN=SAMN04244550_02690 PE=3 SV=1	1.04648	0.865153
tr|A0A0Q0QTW5|A0A0Q0QTW5_RHOCA	RHOCA	1	Putative spermidine/putrescine transport system substrate-binding protein OS=Rhodobacter capsulatus OX=1061 GN=SAMN04244550_02913 PE=4 SV=1	1.03128	0.936896
tr|Q8GEE6|Q8GEE6_RHOCA	RHOCA	1	Pyrophosphate phospho-hydrolase (Fragment) OS=Rhodobacter capsulatus OX=1061 PE=3 SV=1	0.349997	0.0587848
tr|A0A0N8VFH9|A0A0N8VFH9_RHOCA	RHOCA	1	Reaction center protein M chain OS=Rhodobacter capsulatus OX=1061 GN=SAMN04244550_01266 PE=3 SV=1	1.586	0.163088
tr|A0A0Q0VI98|A0A0Q0VI98_RHOCA	RHOCA	1	Ribose-phosphate pyrophosphokinase OS=Rhodobacter capsulatus OX=1061 GN=prs PE=3 SV=1	0.480029	0.116579
tr|A0A0Q0R3B3|A0A0Q0R3B3_RHOCA	RHOCA	1	Ribosome-recycling factor OS=Rhodobacter capsulatus OX=1061 GN=frr PE=3 SV=1	1.22749	0.445991
tr|A0A7H0Y090|A0A7H0Y090_RHOCA	RHOCA	1	Sec translocon accessory complex subunit YajC OS=Rhodobacter capsulatus OX=1061 GN=yajC PE=3 SV=1	1.50988	0.0910925
tr|A0A0Q0QNB7|A0A0Q0QNB7_RHOCA	RHOCA	3	Spermidine/putrescine transport system substrate-binding protein OS=Rhodobacter capsulatus OX=1061 GN=SAMN04244550_02550 PE=3 SV=1	1.95247	0.241878
tr|A0A0Q0QTT0|A0A0Q0QTT0_RHOCA	RHOCA	1	Spheroidene monooxygenase OS=Rhodobacter capsulatus OX=1061 GN=SAMN04244550_01250 PE=4 SV=1	0.609634	0.505205
tr|A0A7H0XYS7|A0A7H0XYS7_RHOCA	RHOCA	1	Succinate dehydrogenase flavoprotein subunit OS=Rhodobacter capsulatus OX=1061 GN=H9N28_03865 PE=3 SV=1	0.691635	0.508068
tr|A0A1G7MCK1|A0A1G7MCK1_RHOCA	RHOCA	2	Sulfide:quinone oxidoreductase OS=Rhodobacter capsulatus OX=1061 GN=SAMN04244550_02502 PE=4 SV=1	1.70503	0.243423
tr|A0A0N8VF37|A0A0N8VF37_RHOCA	RHOCA	2	Tat (Twin-arginine translocation) pathway signal sequence OS=Rhodobacter capsulatus OX=1061 GN=SAMN04244550_00281 PE=3 SV=1	0.691487	0.331928
tr|A0A7H0XW59|A0A7H0XW59_RHOCA	RHOCA	1	Tetratricopeptide repeat protein OS=Rhodobacter capsulatus OX=1061 GN=H9N28_16240 PE=4 SV=1	0.413961	0.142559
tr|A0A1G7MF17|A0A1G7MF17_RHOCA	RHOCA	3	Thiamine-binding periplasmic protein OS=Rhodobacter capsulatus OX=1061 GN=SAMN04244550_02521 PE=3 SV=1	0.637583	0.495373
tr|A0A7H0XV00|A0A7H0XV00_RHOCA	RHOCA	3	Thiamine-phosphate synthase OS=Rhodobacter capsulatus OX=1061 GN=thiE PE=3 SV=1	1.70406	0.0133962
tr|A0A0Q0UUU3|A0A0Q0UUU3_RHOCA	RHOCA	1	Thioredoxin peroxidase OS=Rhodobacter capsulatus OX=1061 GN=SAMN04244550_02053 PE=4 SV=1	0.697357	0.550658
tr|A0A7H0XW70|A0A7H0XW70_RHOCA	RHOCA	7	TonB-dependent receptor OS=Rhodobacter capsulatus OX=1061 GN=H9N28_16295 PE=3 SV=1	1.58416	0.178055
tr|A0A0N8VEN0|A0A0N8VEN0_RHOCA	RHOCA	1	Transcription antitermination protein NusB OS=Rhodobacter capsulatus OX=1061 GN=nusB PE=3 SV=1	1.33365	0.411245
tr|A0A7H0Y174|A0A7H0Y174_RHOCA	RHOCA	4	Transketolase OS=Rhodobacter capsulatus OX=1061 GN=tkt PE=3 SV=1	1.38009	0.0334702
tr|A0A7H0XXA7|A0A7H0XXA7_RHOCA	RHOCA	2	Translation initiation factor IF-2 OS=Rhodobacter capsulatus OX=1061 GN=infB PE=3 SV=1	3.37287	0.0158957
tr|A0A4U1JPG8|A0A4U1JPG8_RHOCA	RHOCA	1	Translation initiation factor IF-3 OS=Rhodobacter capsulatus OX=1061 GN=infC PE=3 SV=1	0.797495	0.618378
tr|A0A7H0XUS7|A0A7H0XUS7_RHOCA	RHOCA	1	Transporter substrate-binding domain-containing protein OS=Rhodobacter capsulatus OX=1061 GN=H9N28_13640 PE=4 SV=1	0.547435	0.0869099
tr|A0A0E2PUC4|A0A0E2PUC4_RHOCA	RHOCA	1	Trigger factor OS=Rhodobacter capsulatus Y262 OX=1415161 GN=tig PE=3 SV=1	0.22337	0.141285
tr|A0A1G7JJX4|A0A1G7JJX4_RHOCA	RHOCA	1	Triosephosphate isomerase OS=Rhodobacter capsulatus OX=1061 GN=tpiA PE=3 SV=1	1.20112	0.649418
tr|A0A1G7E9F0|A0A1G7E9F0_RHOCA	RHOCA	1	Uncharacterized conserved protein OS=Rhodobacter capsulatus OX=1061 GN=SAMN04244550_00696 PE=4 SV=1	3.69039	0.000194987
tr|A0A0Q0QMD6|A0A0Q0QMD6_RHOCA	RHOCA	1	Uncharacterized conserved protein YaaN involved in tellurite resistance OS=Rhodobacter capsulatus OX=1061 GN=SAMN04244550_02415 PE=3 SV=1	0.933774	0.799413
tr|A0A4U1JTI5|A0A4U1JTI5_RHOCA	RHOCA	1	Uncharacterized protein OS=Rhodobacter capsulatus OX=1061 GN=FBT96_05750 PE=4 SV=1	1.94177	0.287781
tr|A0A0Q0QSE7|A0A0Q0QSE7_RHOCA	RHOCA	1	Uncharacterized protein OS=Rhodobacter capsulatus OX=1061 GN=SAMN04244550_01793 PE=4 SV=1	1.23435	0.706751
tr|A0A1G7K0G2|A0A1G7K0G2_RHOCA	RHOCA	2	Uncharacterized protein OS=Rhodobacter capsulatus OX=1061 GN=SAMN04244550_02024 PE=4 SV=1	3.06968	0.0577887
tr|A0A1G7MG18|A0A1G7MG18_RHOCA	RHOCA	1	Uncharacterized protein OS=Rhodobacter capsulatus OX=1061 GN=SAMN04244550_02534 PE=4 SV=1	1.22086	0.688692
tr|A0A0Q0QUG3|A0A0Q0QUG3_RHOCA	RHOCA	4	Uncharacterized protein OS=Rhodobacter capsulatus OX=1061 GN=SAMN04244550_03118 PE=4 SV=1	3.45522	0.0116021
tr|A0A1G7RRD8|A0A1G7RRD8_RHOCA	RHOCA	4	Uncharacterized protein OS=Rhodobacter capsulatus OX=1061 GN=SAMN04244550_03476 PE=4 SV=1	2.92881	0.0279071
tr|A0A7H0XTY6|A0A7H0XTY6_RHOCA	RHOCA	2	Uroporphyrinogen decarboxylase OS=Rhodobacter capsulatus OX=1061 GN=hemE PE=3 SV=1	0.258258	0.190911
tr|A0A0Q0ZZ02|A0A0Q0ZZ02_RHOCA	RHOCA	1	UTP--glucose-1-phosphate uridylyltransferase OS=Rhodobacter capsulatus OX=1061 GN=SAMN04244550_00845 PE=3 SV=1	3.14934	0.0054861

## Sheet: Rhodobacter sp.
ID_PROT	species	# peptides	Name	0,8v/0v norm	p value
tr|A0A330H0F6|A0A330H0F6_9RHOB	9RHOB	3	Phosphoenolpyruvate carboxykinase (ATP) OS=Rhodobacter johrii OX=445629 GN=pckA PE=3 SV=1	0.97853	0.959771
tr|A0A318TZK7|A0A318TZK7_9RHOB	9RHOB	2	Pyruvate kinase OS=Rhodobacter viridis OX=1054202 GN=C8J30_10946 PE=3 SV=1	0.800543	0.394279
tr|A0A330HEN6|A0A330HEN6_9RHOB	9RHOB	1	Fructose-1,6-bisphosphatase class 1 OS=Rhodobacter johrii OX=445629 GN=fbp PE=3 SV=1	0.498362	0.303395
tr|A0A330H898|A0A330H898_9RHOB	9RHOB	2	Cytochrome C OS=Rhodobacter johrii OX=445629 GN=DDV93_16615 PE=4 SV=1	1.17963	0.343498
tr|A0A330H6E2|A0A330H6E2_9RHOB	9RHOB	2	Cytochrome c OS=Rhodobacter johrii OX=445629 GN=DDV93_20145 PE=4 SV=1	0.413934	0.00505973
tr|A0A330HLV6|A0A330HLV6_9RHOB	9RHOB	1	Cytochrome c1 OS=Rhodobacter johrii OX=445629 GN=DDV93_04785 PE=4 SV=1	0.19115	0.0790004
tr|A0A330HCS0|A0A330HCS0_9RHOB	9RHOB	1	Cytochrome-c oxidase, cbb3-type subunit II OS=Rhodobacter johrii OX=445629 GN=ccoO PE=4 SV=1	0.559018	0.0324869
tr|A0A330HBE3|A0A330HBE3_9RHOB	9RHOB	2	Ubiquinol-cytochrome c reductase iron-sulfur subunit OS=Rhodobacter johrii OX=445629 GN=petA PE=3 SV=1	0.397919	0.237486
tr|A0A6M1MLB4|A0A6M1MLB4_9RHOB	9RHOB	1	3-oxoacyl-[acyl-carrier-protein] synthase 2 OS=Rhodobacter sp. SGA-6-6 OX=2710882 GN=fabF PE=3 SV=1	0.475485	0.359915
tr|A0A330HC69|A0A330HC69_9RHOB	9RHOB	2	Succinate--CoA ligase [ADP-forming] subunit alpha OS=Rhodobacter johrii OX=445629 GN=sucD PE=3 SV=1	1.35369	0.0825344
tr|A0A1D9MAQ9|A0A1D9MAQ9_9RHOB	9RHOB	1	Enoyl-[acyl-carrier-protein] reductase [NADH] OS=Rhodobacter sp. LPB0142 OX=1850250 GN=LPB142_05320 PE=3 SV=1	2.74154	0.0105943
tr|A0A330H510|A0A330H510_9RHOB	9RHOB	1	(2Fe-2S)-binding protein OS=Rhodobacter johrii OX=445629 GN=DDV93_14170 PE=4 SV=1	1.85019	0.0791694
tr|A0A1D9MAE0|A0A1D9MAE0_9RHOB	9RHOB	1	10 kDa chaperonin OS=Rhodobacter sp. LPB0142 OX=1850250 GN=groS PE=3 SV=1	2.43815	0.0145081
tr|A0A3D3JBV5|A0A3D3JBV5_9RHOB	9RHOB	1	30S ribosomal protein S10 (Fragment) OS=Rhodobacter sp. OX=1062 GN=DIS71_06620 PE=3 SV=1	1.15578	0.765856
tr|A0A330HGX1|A0A330HGX1_9RHOB	9RHOB	2	30S ribosomal protein S13 OS=Rhodobacter johrii OX=445629 GN=rpsM PE=3 SV=1	0.534489	0.232773
tr|V7EIF3|V7EIF3_9RHOB	9RHOB	2	30S ribosomal protein S18 OS=Rhodobacter sp. CACIA14H1 OX=1408890 GN=rpsR PE=3 SV=1	0.562057	0.206168
tr|V7EJ15|V7EJ15_9RHOB	9RHOB	1	30S ribosomal protein S19 OS=Rhodobacter sp. CACIA14H1 OX=1408890 GN=rpsS PE=3 SV=1	0.629674	0.264362
tr|A0A1N7KX00|A0A1N7KX00_9RHOB	9RHOB	1	30S ribosomal protein S19 OS=Rhodobacter vinaykumarii OX=407234 GN=rpsS PE=3 SV=1	0.510379	0.223136
tr|A0A239CJ44|A0A239CJ44_9RHOB	9RHOB	1	30S ribosomal protein S2 OS=Rhodobacter megalophilus OX=418630 GN=rpsB PE=3 SV=1	2.27984	0.0771926
tr|A0A330HDJ2|A0A330HDJ2_9RHOB	9RHOB	1	30S ribosomal protein S3 OS=Rhodobacter johrii OX=445629 GN=rpsC PE=3 SV=1	1.39594	0.441479
tr|A0A330HLX9|A0A330HLX9_9RHOB	9RHOB	1	30S ribosomal protein S4 OS=Rhodobacter johrii OX=445629 GN=rpsD PE=3 SV=1	1.38487	0.244859
tr|C8S4Z8|C8S4Z8_9RHOB	9RHOB	1	30S ribosomal protein S5 OS=Rhodobacter sp. SW2 OX=371731 GN=rpsE PE=3 SV=1	0.665151	0.183679
tr|A0A318U2V8|A0A318U2V8_9RHOB	9RHOB	1	30S ribosomal protein S7 OS=Rhodobacter viridis OX=1054202 GN=rpsG PE=3 SV=1	1.18697	0.511757
tr|A0A330H4P3|A0A330H4P3_9RHOB	9RHOB	2	30S ribosomal protein S9 OS=Rhodobacter johrii OX=445629 GN=rpsI PE=3 SV=1	3.16156	0.00548572
tr|A0A330HJH5|A0A330HJH5_9RHOB	9RHOB	3	50S ribosomal protein L15 OS=Rhodobacter johrii OX=445629 GN=rplO PE=3 SV=1	1.30125	0.329993
tr|A0A330HDR3|A0A330HDR3_9RHOB	9RHOB	3	50S ribosomal protein L2 OS=Rhodobacter johrii OX=445629 GN=rplB PE=3 SV=1	0.486344	0.00738438
tr|A0A318U3C7|A0A318U3C7_9RHOB	9RHOB	3	50S ribosomal protein L2 OS=Rhodobacter viridis OX=1054202 GN=rplB PE=3 SV=1	2.22788	0.0171008
tr|A0A330HI07|A0A330HI07_9RHOB	9RHOB	2	50S ribosomal protein L25 OS=Rhodobacter johrii OX=445629 GN=rplY PE=3 SV=1	0.816724	0.60125
tr|A0A330HC49|A0A330HC49_9RHOB	9RHOB	1	50S ribosomal protein L27 OS=Rhodobacter johrii OX=445629 GN=rpmA PE=3 SV=1	0.741073	0.530133
tr|A0A348MNE4|A0A348MNE4_9RHOB	9RHOB	1	50S ribosomal protein L34 OS=Rhodobacter sp. OX=1062 GN=rpmH PE=3 SV=1	1.4188	0.601547
tr|A0A330HED1|A0A330HED1_9RHOB	9RHOB	1	50S ribosomal protein L6 OS=Rhodobacter johrii OX=445629 GN=rplF PE=3 SV=1	0.367262	0.12522
tr|A0A6B3RLD0|A0A6B3RLD0_9RHOB	9RHOB	1	50S ribosomal protein L7/L12 OS=Rhodobacter sp. ETT8 OX=2709381 GN=rplL PE=3 SV=1	3.87429	0.0960473
tr|A0A6M1MJS1|A0A6M1MJS1_9RHOB	9RHOB	1	50S ribosomal protein L7/L12 OS=Rhodobacter sp. SGA-6-6 OX=2710882 GN=rplL PE=3 SV=1	0.341424	0.264668
tr|A0A330HBG0|A0A330HBG0_9RHOB	9RHOB	5	50S ribosomal protein L9 OS=Rhodobacter johrii OX=445629 GN=rplI PE=3 SV=1	0.83377	0.402906
tr|A0A330H2S6|A0A330H2S6_9RHOB	9RHOB	11	5-methyltetrahydropteroyltriglutamate--homocysteine methyltransferase OS=Rhodobacter johrii OX=445629 GN=metE PE=3 SV=1	0.729552	0.0108087
tr|A0A330HFD5|A0A330HFD5_9RHOB	9RHOB	3	ABC transporter substrate-binding protein OS=Rhodobacter johrii OX=445629 GN=DDV93_04365 PE=3 SV=1	0.501323	0.108917
tr|A0A330HD31|A0A330HD31_9RHOB	9RHOB	1	ABC transporter substrate-binding protein OS=Rhodobacter johrii OX=445629 GN=DDV93_07820 PE=3 SV=1	1.2123	0.679088
tr|A0A330H9L8|A0A330H9L8_9RHOB	9RHOB	5	ABC transporter substrate-binding protein OS=Rhodobacter johrii OX=445629 GN=DDV93_10405 PE=3 SV=1	0.5102	0.0470797
tr|A0A330HD67|A0A330HD67_9RHOB	9RHOB	3	ABC transporter substrate-binding protein OS=Rhodobacter johrii OX=445629 GN=DDV93_12205 PE=4 SV=1	0.59429	0.367798
tr|A0A330H561|A0A330H561_9RHOB	9RHOB	2	ABC transporter substrate-binding protein OS=Rhodobacter johrii OX=445629 GN=DDV93_15950 PE=4 SV=1	0.426933	0.0848542
tr|A0A330HGJ8|A0A330HGJ8_9RHOB	9RHOB	5	ABC transporter substrate-binding protein OS=Rhodobacter johrii OX=445629 GN=DDV93_16870 PE=4 SV=1	0.613809	0.0328852
tr|A0A330HH54|A0A330HH54_9RHOB	9RHOB	1	Acetolactate synthase OS=Rhodobacter johrii OX=445629 GN=DDV93_02710 PE=3 SV=1	0.696099	0.389373
tr|A0A330H5Q3|A0A330H5Q3_9RHOB	9RHOB	1	Amino acid ABC transporter OS=Rhodobacter johrii OX=445629 GN=DDV93_17005 PE=4 SV=1	0.660561	0.366344
tr|A0A330HGY0|A0A330HGY0_9RHOB	9RHOB	9	Amino acid ABC transporter substrate-binding protein OS=Rhodobacter johrii OX=445629 GN=DDV93_03645 PE=4 SV=1	1.17763	0.55986
tr|A0A330H7Q4|A0A330H7Q4_9RHOB	9RHOB	2	Antenna pigment protein alpha chain OS=Rhodobacter johrii OX=445629 GN=DDV93_17875 PE=3 SV=1	0.458275	0.162694
tr|A0A330HH35|A0A330HH35_9RHOB	9RHOB	2	Argininosuccinate synthase OS=Rhodobacter johrii OX=445629 GN=argG PE=3 SV=1	0.431572	0.062368
tr|A0A330HC46|A0A330HC46_9RHOB	9RHOB	1	Aromatic amino acid aminotransferase OS=Rhodobacter johrii OX=445629 GN=DDV93_07400 PE=3 SV=1	1.08602	0.834047
tr|A0A330HGA9|A0A330HGA9_9RHOB	9RHOB	2	ATP synthase subunit alpha OS=Rhodobacter johrii OX=445629 GN=atpA PE=3 SV=1	1.38078	0.071608
tr|A0A318TYK3|A0A318TYK3_9RHOB	9RHOB	3	ATP synthase subunit alpha OS=Rhodobacter viridis OX=1054202 GN=atpA PE=3 SV=1	2.28933	0.0991391
tr|A0A330HBV3|A0A330HBV3_9RHOB	9RHOB	1	ATP synthase subunit b OS=Rhodobacter johrii OX=445629 GN=atpF PE=3 SV=1	2.41169	0.0339033
tr|A0A330HJF7|A0A330HJF7_9RHOB	9RHOB	3	ATP synthase subunit beta OS=Rhodobacter johrii OX=445629 GN=atpD PE=3 SV=1	1.2818	0.153376
tr|A0A330HH37|A0A330HH37_9RHOB	9RHOB	2	ATP synthase subunit delta OS=Rhodobacter johrii OX=445629 GN=atpH PE=3 SV=1	1.30284	0.21267
tr|A0A318TUU4|A0A318TUU4_9RHOB	9RHOB	1	ATP-dependent Clp protease proteolytic subunit OS=Rhodobacter viridis OX=1054202 GN=clpP PE=3 SV=1	1.13614	0.757428
tr|A0A1N7KSS5|A0A1N7KSS5_9RHOB	9RHOB	2	Beta-methylmalyl-CoA/L-malyl-CoA lyase OS=Rhodobacter vinaykumarii OX=407234 GN=SAMN05421795_102114 PE=3 SV=1	1.11626	0.806419
tr|A0A330GZU8|A0A330GZU8_9RHOB	9RHOB	3	BMP family ABC transporter substrate-binding protein OS=Rhodobacter johrii OX=445629 GN=DDV93_22270 PE=3 SV=1	1.36017	0.277181
tr|A0A6M1MGG7|A0A6M1MGG7_9RHOB	9RHOB	1	BMP family ABC transporter substrate-binding protein OS=Rhodobacter sp. SGA-6-6 OX=2710882 GN=G5B31_00580 PE=3 SV=1	0.819845	0.5919
tr|A0A330HAS4|A0A330HAS4_9RHOB	9RHOB	2	Branched-chain amino acid ABC transporter substrate-binding protein OS=Rhodobacter johrii OX=445629 GN=DDV93_14405 PE=4 SV=1	1.85174	0.123877
tr|A0A330H968|A0A330H968_9RHOB	9RHOB	1	C4-dicarboxylate ABC transporter OS=Rhodobacter johrii OX=445629 GN=DDV93_09775 PE=3 SV=1	0.882533	0.703508
tr|A0A330HHK2|A0A330HHK2_9RHOB	9RHOB	1	C4-dicarboxylate ABC transporter substrate-binding protein OS=Rhodobacter johrii OX=445629 GN=DDV93_02950 PE=3 SV=1	1.14047	0.894064
tr|A0A330HBE7|A0A330HBE7_9RHOB	9RHOB	3	Chaperone protein DnaK OS=Rhodobacter johrii OX=445629 GN=dnaK PE=2 SV=1	0.830725	0.35241
tr|A0A330HGQ2|A0A330HGQ2_9RHOB	9RHOB	4	Choline ABC transporter substrate-binding protein OS=Rhodobacter johrii OX=445629 GN=DDV93_00440 PE=4 SV=1	0.759106	0.363227
tr|A0A330HF08|A0A330HF08_9RHOB	9RHOB	2	Cobalt transporter OS=Rhodobacter johrii OX=445629 GN=DDV93_10640 PE=4 SV=1	1.04379	0.889334
tr|A0A2T5JKG6|A0A2T5JKG6_9RHOB	9RHOB	1	Cobyric acid synthase OS=Rhodobacter azotoformans OX=43057 GN=cobQ PE=3 SV=1	0.313854	0.0516112
tr|A0A330H139|A0A330H139_9RHOB	9RHOB	2	Copper-binding protein OS=Rhodobacter johrii OX=445629 GN=DDV93_20740 PE=4 SV=1	0.558261	0.201072
tr|A0A239F133|A0A239F133_9RHOB	9RHOB	2	CRISPR system Cascade subunit CasC OS=Rhodobacter megalophilus OX=418630 GN=SAMN05421763_10212 PE=4 SV=1	1.52221	0.226536
tr|A0A330HB61|A0A330HB61_9RHOB	9RHOB	1	CsbD family protein OS=Rhodobacter johrii OX=445629 GN=DDV93_05415 PE=3 SV=1	2.02491	0.163864
tr|A0A330HF54|A0A330HF54_9RHOB	9RHOB	1	Cysteine synthase OS=Rhodobacter johrii OX=445629 GN=DDV93_06220 PE=4 SV=1	0.356289	0.121587
tr|A0A330HDT8|A0A330HDT8_9RHOB	9RHOB	1	D-3-phosphoglycerate dehydrogenase OS=Rhodobacter johrii OX=445629 GN=DDV93_04990 PE=3 SV=1	2.14283	0.0596027
tr|A0A330HG17|A0A330HG17_9RHOB	9RHOB	2	DUF1013 domain-containing protein OS=Rhodobacter johrii OX=445629 GN=DDV93_08320 PE=4 SV=1	2.33867	0.0991215
tr|A0A330HJ67|A0A330HJ67_9RHOB	9RHOB	1	DUF1523 family protein OS=Rhodobacter johrii OX=445629 GN=DDV93_03710 PE=4 SV=1	0.849816	0.767314
tr|A0A330H7D9|A0A330H7D9_9RHOB	9RHOB	1	DUF2383 domain-containing protein OS=Rhodobacter johrii OX=445629 GN=DDV93_12290 PE=4 SV=1	3.27472	0.100761
tr|A0A330H1P1|A0A330H1P1_9RHOB	9RHOB	1	DUF892 domain-containing protein OS=Rhodobacter johrii OX=445629 GN=DDV93_18645 PE=4 SV=1	1.2315	0.335616
tr|A0A330HH60|A0A330HH60_9RHOB	9RHOB	2	D-xylose ABC transporter substrate-binding protein OS=Rhodobacter johrii OX=445629 GN=xylF PE=4 SV=1	0.818598	0.638593
tr|A0A330H1B3|A0A330H1B3_9RHOB	9RHOB	1	Efflux transporter periplasmic adaptor subunit OS=Rhodobacter johrii OX=445629 GN=DDV93_20210 PE=3 SV=1	2.45006	0.273654
tr|A0A330H0G6|A0A330H0G6_9RHOB	9RHOB	1	Electron transfer flavoprotein subunit alpha/FixB family protein OS=Rhodobacter johrii OX=445629 GN=DDV93_21520 PE=3 SV=1	1.91138	0.250448
tr|A0A330H4M0|A0A330H4M0_9RHOB	9RHOB	2	Electron transfer flavoprotein subunit beta/FixA family protein OS=Rhodobacter johrii OX=445629 GN=DDV93_21525 PE=3 SV=1	0.654634	0.192487
tr|A0A330HJ86|A0A330HJ86_9RHOB	9RHOB	2	Electron transfer flavoprotein-ubiquinone oxidoreductase OS=Rhodobacter johrii OX=445629 GN=DDV93_03815 PE=4 SV=1	1.08572	0.810934
tr|A0A330H9H6|A0A330H9H6_9RHOB	9RHOB	3	Elongation factor Ts OS=Rhodobacter johrii OX=445629 GN=tsf PE=3 SV=1	1.65175	0.0450402
tr|A0A330HI42|A0A330HI42_9RHOB	9RHOB	1	Ferredoxin OS=Rhodobacter johrii OX=445629 GN=DDV93_01665 PE=4 SV=1	0.597766	0.325691
tr|A0A2T4JIH2|A0A2T4JIH2_9RHOB	9RHOB	1	Glutamyl-tRNA(Gln) amidotransferase subunit A OS=Rhodobacter veldkampii DSM 11550 OX=1185920 GN=gatA PE=3 SV=1	1.75732	0.114346
tr|A0A330HB80|A0A330HB80_9RHOB	9RHOB	1	Glutathione-dependent disulfide-bond oxidoreductase OS=Rhodobacter johrii OX=445629 GN=DDV93_12060 PE=4 SV=1	3.94414	0.00296389
tr|A0A330H595|A0A330H595_9RHOB	9RHOB	2	Glyceraldehyde-3-phosphate dehydrogenase OS=Rhodobacter johrii OX=445629 GN=gap PE=3 SV=1	1.27386	0.439375
tr|A0A330H2S2|A0A330H2S2_9RHOB	9RHOB	3	H-NS histone family protein OS=Rhodobacter johrii OX=445629 GN=DDV93_18080 PE=3 SV=1	0.533467	0.265559
tr|A0A330HG76|A0A330HG76_9RHOB	9RHOB	3	Hydroxyethylthiazole kinase OS=Rhodobacter johrii OX=445629 GN=thiM PE=3 SV=1	0.52947	0.0157379
tr|A0A2T5JKA4|A0A2T5JKA4_9RHOB	9RHOB	3	Iron complex transport system substrate-binding protein OS=Rhodobacter azotoformans OX=43057 GN=C8J28_1442 PE=4 SV=1	0.929476	0.709707
tr|A0A330HJG4|A0A330HJG4_9RHOB	9RHOB	1	Ketol-acid reductoisomerase (NADP(+)) OS=Rhodobacter johrii OX=445629 GN=ilvC PE=3 SV=1	0.366393	0.35209
tr|A0A330HEK0|A0A330HEK0_9RHOB	9RHOB	2	LprI domain-containing protein OS=Rhodobacter johrii OX=445629 GN=DDV93_10075 PE=4 SV=1	0.95358	0.855616
tr|A0A3G2TG17|A0A3G2TG17_9RHOB	9RHOB	1	Nitrogenase iron protein OS=Rhodobacter sp. OX=1062 GN=nifH PE=3 SV=1	1.19172	0.621252
tr|A0A330H0V3|A0A330H0V3_9RHOB	9RHOB	2	Nitrogenase molybdenum-iron protein beta chain OS=Rhodobacter johrii OX=445629 GN=nifK PE=3 SV=1	0.572776	0.269773
tr|A0A330HD17|A0A330HD17_9RHOB	9RHOB	1	OsmC family peroxiredoxin OS=Rhodobacter johrii OX=445629 GN=DDV93_09005 PE=4 SV=1	0.978982	0.875765
tr|A0A330H803|A0A330H803_9RHOB	9RHOB	1	Outer membrane protein assembly factor BamA OS=Rhodobacter johrii OX=445629 GN=bamA PE=3 SV=1	0.508145	0.426578
tr|A0A330HBZ7|A0A330HBZ7_9RHOB	9RHOB	4	Parvulin-like PPIase OS=Rhodobacter johrii OX=445629 GN=DDV93_05920 PE=3 SV=1	0.859048	0.493606
tr|A0A330H296|A0A330H296_9RHOB	9RHOB	2	Peptide ABC transporter substrate-binding protein OS=Rhodobacter johrii OX=445629 GN=DDV93_18275 PE=3 SV=1	0.873283	0.633093
tr|A0A330HGS6|A0A330HGS6_9RHOB	9RHOB	2	Peptidyl-prolyl cis-trans isomerase OS=Rhodobacter johrii OX=445629 GN=DDV93_01990 PE=3 SV=1	0.802283	0.518388
tr|A0A330HHJ8|A0A330HHJ8_9RHOB	9RHOB	2	Phosphoglycerate kinase OS=Rhodobacter johrii OX=445629 GN=pgk PE=3 SV=1	0.98382	0.949199
tr|A0A285SGD7|A0A285SGD7_9RHOB	9RHOB	2	Phosphomethylpyrimidine synthase OS=Rhodobacter maris OX=446682 GN=thiC PE=3 SV=1	2.09685	0.098667
tr|A0A330HG13|A0A330HG13_9RHOB	9RHOB	2	Polyamine ABC transporter substrate-binding protein OS=Rhodobacter johrii OX=445629 GN=DDV93_00245 PE=3 SV=1	0.585483	0.116822
tr|A0A330H6K0|A0A330H6K0_9RHOB	9RHOB	1	Polymer-forming cytoskeletal protein OS=Rhodobacter johrii OX=445629 GN=DDV93_19400 PE=4 SV=1	2.09506	0.000406651
tr|A0A330HHM5|A0A330HHM5_9RHOB	9RHOB	3	Polyribonucleotide nucleotidyltransferase OS=Rhodobacter johrii OX=445629 GN=pnp PE=3 SV=1	1.39537	0.244376
tr|A0A330HG46|A0A330HG46_9RHOB	9RHOB	2	Porphobilinogen deaminase OS=Rhodobacter johrii OX=445629 GN=hemC PE=3 SV=1	0.793224	0.223525
tr|A0A330H4Q1|A0A330H4Q1_9RHOB	9RHOB	1	Precorrin-8X methylmutase OS=Rhodobacter johrii OX=445629 GN=DDV93_13700 PE=3 SV=1	0.210426	0.130281
tr|A0A330HDW5|A0A330HDW5_9RHOB	9RHOB	1	Probable branched-chain-amino-acid aminotransferase OS=Rhodobacter johrii OX=445629 GN=DDV93_03755 PE=3 SV=1	0.46857	0.0726253
tr|A0A330H531|A0A330H531_9RHOB	9RHOB	2	Probable cytosol aminopeptidase OS=Rhodobacter johrii OX=445629 GN=pepA PE=3 SV=1	0.524749	0.0451806
tr|Q8GIC2|Q8GIC2_9RHOB	9RHOB	2	Reaction center protein M chain (Fragment) OS=Rhodobacter azotoformans OX=43057 GN=pufM PE=3 SV=1	0.42094	0.0932446
tr|A0A285SYI8|A0A285SYI8_9RHOB	9RHOB	1	Ribulose-phosphate 3-epimerase OS=Rhodobacter maris OX=446682 GN=rpe PE=3 SV=1	0.796528	0.356074
tr|A0A330HF34|A0A330HF34_9RHOB	9RHOB	1	RidA family protein OS=Rhodobacter johrii OX=445629 GN=DDV93_07360 PE=4 SV=1	0.974521	0.944542
tr|A0A330HF56|A0A330HF56_9RHOB	9RHOB	1	Single-stranded DNA-binding protein OS=Rhodobacter johrii OX=445629 GN=DDV93_03895 PE=3 SV=1	0.42589	0.383098
tr|A0A330HBR9|A0A330HBR9_9RHOB	9RHOB	4	Spheroidene monooxygenase OS=Rhodobacter johrii OX=445629 GN=DDV93_16490 PE=4 SV=1	0.618019	0.188014
tr|A0A330HD18|A0A330HD18_9RHOB	9RHOB	1	Sugar ABC transporter substrate-binding protein OS=Rhodobacter johrii OX=445629 GN=DDV93_06840 PE=4 SV=1	1.90145	0.0771532
tr|A0A330HBW9|A0A330HBW9_9RHOB	9RHOB	3	Thiamine-binding periplasmic protein OS=Rhodobacter johrii OX=445629 GN=DDV93_04800 PE=3 SV=1	1.05896	0.84665
tr|A0A330HIE6|A0A330HIE6_9RHOB	9RHOB	1	Tol-Pal system protein TolB OS=Rhodobacter johrii OX=445629 GN=tolB PE=3 SV=1	0.840491	0.634852
tr|A0A330H776|A0A330H776_9RHOB	9RHOB	1	Transporter OS=Rhodobacter johrii OX=445629 GN=DDV93_12850 PE=4 SV=1	0.711157	0.584718
tr|A0A330H5C9|A0A330H5C9_9RHOB	9RHOB	1	Transporter OS=Rhodobacter johrii OX=445629 GN=DDV93_16380 PE=3 SV=1	0.3624	0.43472
tr|A0A6M1MI60|A0A6M1MI60_9RHOB	9RHOB	1	Transporter OS=Rhodobacter sp. SGA-6-6 OX=2710882 GN=G5B31_08065 PE=4 SV=1	2.64945	0.0258837
tr|A0A6M1TP81|A0A6M1TP81_9RHOB	9RHOB	1	TRAP transporter substrate-binding protein OS=Rhodobacter sp. HX-7-19 OX=2583234 GN=G5V65_02035 PE=3 SV=1	1.35066	0.408262
tr|A0A318U493|A0A318U493_9RHOB	9RHOB	3	Two-component system response regulator RegA OS=Rhodobacter viridis OX=1054202 GN=C8J30_102212 PE=4 SV=1	0.570372	0.312614
tr|A0A330HIU7|A0A330HIU7_9RHOB	9RHOB	1	UDP-glucose 6-dehydrogenase OS=Rhodobacter johrii OX=445629 GN=DDV93_08680 PE=3 SV=1	0.216253	0.102567
tr|A0A330HJL9|A0A330HJL9_9RHOB	9RHOB	2	Uncharacterized protein OS=Rhodobacter johrii OX=445629 GN=DDV93_01435 PE=4 SV=1	0.496916	0.197737
tr|A0A330HGN4|A0A330HGN4_9RHOB	9RHOB	1	Uncharacterized protein OS=Rhodobacter johrii OX=445629 GN=DDV93_01450 PE=4 SV=1	0.358278	0.142053
tr|A0A330HGQ3|A0A330HGQ3_9RHOB	9RHOB	7	Uncharacterized protein OS=Rhodobacter johrii OX=445629 GN=DDV93_01555 PE=3 SV=1	1.00427	0.98331
tr|A0A330HEQ6|A0A330HEQ6_9RHOB	9RHOB	1	Uncharacterized protein OS=Rhodobacter johrii OX=445629 GN=DDV93_10375 PE=4 SV=1	0.90413	0.848022
tr|A0A330H2T4|A0A330H2T4_9RHOB	9RHOB	1	Uncharacterized protein OS=Rhodobacter johrii OX=445629 GN=DDV93_18135 PE=4 SV=1	1.37338	0.201554
tr|A0A330HIC0|A0A330HIC0_9RHOB	9RHOB	4	Universal stress protein OS=Rhodobacter johrii OX=445629 GN=DDV93_08445 PE=3 SV=1	1.24278	0.274861
tr|A0A330H1T2|A0A330H1T2_9RHOB	9RHOB	1	Universal stress protein OS=Rhodobacter johrii OX=445629 GN=DDV93_18620 PE=3 SV=1	0.750289	0.498324
tr|A0A318U339|A0A318U339_9RHOB	9RHOB	1	Uridylate kinase OS=Rhodobacter viridis OX=1054202 GN=pyrH PE=3 SV=1	0.453353	0.155831

## Sheet: W. succinogenes 
ID_PROT	species	# peptides	Name	0,8v/0,v norm	p value
sp|P17596|FRDB_WOLSU	WOLSU	10	Fumarate reductase iron-sulfur subunit OS=Wolinella succinogenes (strain ATCC 29543 / DSM 1740 / LMG 7466 / NCTC 11488 / FDC 602W) OX=273121 GN=frdB PE=1 SV=1	1.11219	0.623711
sp|P17412|FRDA_WOLSU	WOLSU	23	Fumarate reductase flavoprotein subunit OS=Wolinella succinogenes (strain ATCC 29543 / DSM 1740 / LMG 7466 / NCTC 11488 / FDC 602W) OX=273121 GN=frdA PE=1 SV=3	1.03454	0.838097
sp|P17413|FRDC_WOLSU	WOLSU	2	Fumarate reductase cytochrome b subunit OS=Wolinella succinogenes (strain ATCC 29543 / DSM 1740 / LMG 7466 / NCTC 11488 / FDC 602W) OX=273121 GN=frdC PE=1 SV=1	0.750527	0.134762
tr|Q7M9W0|Q7M9W0_WOLSU	WOLSU	2	3-oxoacyl-[acyl-carrier-protein] reductase OS=Wolinella succinogenes (strain ATCC 29543 / DSM 1740 / LMG 7466 / NCTC 11488 / FDC 602W) OX=273121 GN=FABG PE=3 SV=1	2.20824	0.0572464
sp|Q7M8F0|RL15_WOLSU	WOLSU	1	50S ribosomal protein L15 OS=Wolinella succinogenes (strain ATCC 29543 / DSM 1740 / LMG 7466 / NCTC 11488 / FDC 602W) OX=273121 GN=rplO PE=3 SV=1	4.37911	0.0755749
tr|Q7MSF5|Q7MSF5_WOLSU	WOLSU	1	Uncharacterized protein OS=Wolinella succinogenes (strain ATCC 29543 / DSM 1740 / LMG 7466 / NCTC 11488 / FDC 602W) OX=273121 GN=ATPF' PE=3 SV=1	4.09219	0.328833
tr|Q7M7S1|Q7M7S1_WOLSU	WOLSU	2	N5-carboxyaminoimidazole ribonucleotide mutase OS=Wolinella succinogenes (strain ATCC 29543 / DSM 1740 / LMG 7466 / NCTC 11488 / FDC 602W) OX=273121 GN=PURE PE=3 SV=1	3.01643	0.0049276
tr|Q7MSV2|Q7MSV2_WOLSU	WOLSU	1	DUF4405 domain-containing protein OS=Wolinella succinogenes (strain ATCC 29543 / DSM 1740 / LMG 7466 / NCTC 11488 / FDC 602W) OX=273121 GN=CYTB PE=4 SV=1	2.93731	0.0146402
tr|Q7M8U9|Q7M8U9_WOLSU	WOLSU	1	Nitrogenase molybdenum-iron protein beta chain OS=Wolinella succinogenes (strain ATCC 29543 / DSM 1740 / LMG 7466 / NCTC 11488 / FDC 602W) OX=273121 GN=NIFK PE=3 SV=1	2.6605	0.462917
sp|Q7M8E8|RL18_WOLSU	WOLSU	1	50S ribosomal protein L18 OS=Wolinella succinogenes (strain ATCC 29543 / DSM 1740 / LMG 7466 / NCTC 11488 / FDC 602W) OX=273121 GN=rplR PE=3 SV=1	2.65992	0.144156
tr|Q7MAS8|Q7MAS8_WOLSU	WOLSU	1	PUTATIVE UDP-GLUCOSE 6-DEHYDROGENASE OS=Wolinella succinogenes (strain ATCC 29543 / DSM 1740 / LMG 7466 / NCTC 11488 / FDC 602W) OX=273121 GN=WBGT PE=3 SV=1	2.59188	0.142321
tr|Q7M8C0|Q7M8C0_WOLSU	WOLSU	1	Alkyl hydroperoxide reductase C OS=Wolinella succinogenes (strain ATCC 29543 / DSM 1740 / LMG 7466 / NCTC 11488 / FDC 602W) OX=273121 GN=AHPC1 PE=3 SV=1	2.44063	0.100219
tr|Q7MSV1|Q7MSV1_WOLSU	WOLSU	1	UPF0234 protein WS0081 OS=Wolinella succinogenes (strain ATCC 29543 / DSM 1740 / LMG 7466 / NCTC 11488 / FDC 602W) OX=273121 GN=WS0081 PE=3 SV=1	2.23138	0.0664135
tr|Q7M998|Q7M998_WOLSU	WOLSU	1	Biotin carboxylase OS=Wolinella succinogenes (strain ATCC 29543 / DSM 1740 / LMG 7466 / NCTC 11488 / FDC 602W) OX=273121 GN=WS1074 PE=4 SV=1	2.20516	0.185727
tr|Q7M958|Q7M958_WOLSU	WOLSU	4	Cysteine synthase OS=Wolinella succinogenes (strain ATCC 29543 / DSM 1740 / LMG 7466 / NCTC 11488 / FDC 602W) OX=273121 GN=WS1188 PE=3 SV=1	2.09285	0.000910038
tr|Q7M9W2|Q7M9W2_WOLSU	WOLSU	1	3-oxoacyl-[acyl-carrier-protein] synthase 2 OS=Wolinella succinogenes (strain ATCC 29543 / DSM 1740 / LMG 7466 / NCTC 11488 / FDC 602W) OX=273121 GN=FABB PE=3 SV=1	2.07338	0.120403
tr|Q7M8S4|Q7M8S4_WOLSU	WOLSU	2	Phospho-2-dehydro-3-deoxyheptonate aldolase OS=Wolinella succinogenes (strain ATCC 29543 / DSM 1740 / LMG 7466 / NCTC 11488 / FDC 602W) OX=273121 GN=WS1452 PE=3 SV=1	1.99255	0.264503
tr|Q7MA83|Q7MA83_WOLSU	WOLSU	2	Adenylosuccinate lyase OS=Wolinella succinogenes (strain ATCC 29543 / DSM 1740 / LMG 7466 / NCTC 11488 / FDC 602W) OX=273121 GN=PURB PE=3 SV=1	1.98587	0.0614345
sp|Q7M8E1|RL16_WOLSU	WOLSU	2	50S ribosomal protein L16 OS=Wolinella succinogenes (strain ATCC 29543 / DSM 1740 / LMG 7466 / NCTC 11488 / FDC 602W) OX=273121 GN=rplP PE=3 SV=1	1.8946	0.0403201
tr|Q7M7R6|Q7M7R6_WOLSU	WOLSU	1	PYRUVATE FERREDOXIN OXIDOREDUCTASE, BETA SUBUNIT OS=Wolinella succinogenes (strain ATCC 29543 / DSM 1740 / LMG 7466 / NCTC 11488 / FDC 602W) OX=273121 GN=WS2128 PE=4 SV=1	1.88006	0.0994093
tr|Q7MRV1|Q7MRV1_WOLSU	WOLSU	5	Uncharacterized protein OS=Wolinella succinogenes (strain ATCC 29543 / DSM 1740 / LMG 7466 / NCTC 11488 / FDC 602W) OX=273121 GN=WS1019 PE=3 SV=1	1.84554	0.112953
sp|Q7MA58|RL10_WOLSU	WOLSU	2	50S ribosomal protein L10 OS=Wolinella succinogenes (strain ATCC 29543 / DSM 1740 / LMG 7466 / NCTC 11488 / FDC 602W) OX=273121 GN=rplJ PE=3 SV=1	1.84248	0.0529052
tr|Q7M8X7|Q7M8X7_WOLSU	WOLSU	2	PUTATIVE PERIPLASMIC PROTEIN OS=Wolinella succinogenes (strain ATCC 29543 / DSM 1740 / LMG 7466 / NCTC 11488 / FDC 602W) OX=273121 GN=WS1329 PE=4 SV=1	1.79002	0.116331
tr|Q7MA61|Q7MA61_WOLSU	WOLSU	2	Transcription termination/antitermination protein NusG OS=Wolinella succinogenes (strain ATCC 29543 / DSM 1740 / LMG 7466 / NCTC 11488 / FDC 602W) OX=273121 GN=NUSG PE=3 SV=1	1.78299	0.0587551
tr|Q7MAS5|Q7MAS5_WOLSU	WOLSU	2	Cell shape-determining protein MreB OS=Wolinella succinogenes (strain ATCC 29543 / DSM 1740 / LMG 7466 / NCTC 11488 / FDC 602W) OX=273121 GN=MREB PE=3 SV=1	1.76843	0.191782
tr|Q7MA31|Q7MA31_WOLSU	WOLSU	1	TRANSLATION INITIATION INHIBITOR OS=Wolinella succinogenes (strain ATCC 29543 / DSM 1740 / LMG 7466 / NCTC 11488 / FDC 602W) OX=273121 GN=WS0502 PE=3 SV=1	1.76376	0.0647007
sp|Q7M9S1|TRPB1_WOLSU	WOLSU	1	Tryptophan synthase beta chain 1 OS=Wolinella succinogenes (strain ATCC 29543 / DSM 1740 / LMG 7466 / NCTC 11488 / FDC 602W) OX=273121 GN=trpB1 PE=3 SV=1	1.75262	0.174729
tr|Q7MAG5|Q7MAG5_WOLSU	WOLSU	6	5-methyltetrahydropteroyltriglutamate--homocysteine methyltransferase OS=Wolinella succinogenes (strain ATCC 29543 / DSM 1740 / LMG 7466 / NCTC 11488 / FDC 602W) OX=273121 GN=metE PE=3 SV=1	1.73408	0.0205811
sp|Q7MSF4|ATPE_WOLSU	WOLSU	2	ATP synthase epsilon chain OS=Wolinella succinogenes (strain ATCC 29543 / DSM 1740 / LMG 7466 / NCTC 11488 / FDC 602W) OX=273121 GN=atpC PE=3 SV=1	1.73325	0.101719
tr|Q7MAE1|Q7MAE1_WOLSU	WOLSU	1	Aminotransferase OS=Wolinella succinogenes (strain ATCC 29543 / DSM 1740 / LMG 7466 / NCTC 11488 / FDC 602W) OX=273121 GN=ASPB PE=3 SV=1	1.73244	0.342821
sp|P31883|MBHL_WOLSU	WOLSU	19	Quinone-reactive Ni/Fe-hydrogenase large chain OS=Wolinella succinogenes (strain ATCC 29543 / DSM 1740 / LMG 7466 / NCTC 11488 / FDC 602W) OX=273121 GN=hydB PE=1 SV=3	1.71811	0.00525618
tr|Q7M843|Q7M843_WOLSU	WOLSU	4	Inosine-5'-monophosphate dehydrogenase OS=Wolinella succinogenes (strain ATCC 29543 / DSM 1740 / LMG 7466 / NCTC 11488 / FDC 602W) OX=273121 GN=GUAB PE=3 SV=1	1.68435	0.171909
sp|Q7M8I1|AROQ_WOLSU	WOLSU	1	3-dehydroquinate dehydratase OS=Wolinella succinogenes (strain ATCC 29543 / DSM 1740 / LMG 7466 / NCTC 11488 / FDC 602W) OX=273121 GN=aroQ PE=3 SV=1	1.66429	0.462223
tr|Q7M8R4|Q7M8R4_WOLSU	WOLSU	8	ABC TRANSPORT SYSTEM PERIPLASMIC BINDING PROTEIN OS=Wolinella succinogenes (strain ATCC 29543 / DSM 1740 / LMG 7466 / NCTC 11488 / FDC 602W) OX=273121 GN=LIVK PE=4 SV=1	1.65936	0.0598413
tr|Q7M9G6|Q7M9G6_WOLSU	WOLSU	3	METHYL-ACC. CHEMOTAXIS SIGNAL TRANSDUCTION OS=Wolinella succinogenes (strain ATCC 29543 / DSM 1740 / LMG 7466 / NCTC 11488 / FDC 602W) OX=273121 GN=WS0939 PE=4 SV=1	1.65139	0.36892
sp|P42470|ATPB_WOLSU	WOLSU	15	ATP synthase subunit beta OS=Wolinella succinogenes (strain ATCC 29543 / DSM 1740 / LMG 7466 / NCTC 11488 / FDC 602W) OX=273121 GN=atpD PE=3 SV=1	1.6353	0.00936701
tr|Q7M9W8|Q7M9W8_WOLSU	WOLSU	2	RESPONSE REGULATOR OS=Wolinella succinogenes (strain ATCC 29543 / DSM 1740 / LMG 7466 / NCTC 11488 / FDC 602W) OX=273121 GN=CHEY PE=4 SV=1	1.63002	0.0316625
tr|Q7MS77|Q7MS77_WOLSU	WOLSU	1	Uncharacterized protein OS=Wolinella succinogenes (strain ATCC 29543 / DSM 1740 / LMG 7466 / NCTC 11488 / FDC 602W) OX=273121 GN=WS0688 PE=4 SV=1	1.62794	0.0546901
tr|Q7M9M8|Q7M9M8_WOLSU	WOLSU	2	Transcription termination factor Rho OS=Wolinella succinogenes (strain ATCC 29543 / DSM 1740 / LMG 7466 / NCTC 11488 / FDC 602W) OX=273121 GN=RHO PE=3 SV=1	1.59464	0.365575
tr|Q7MSI5|Q7MSI5_WOLSU	WOLSU	2	Uncharacterized protein OS=Wolinella succinogenes (strain ATCC 29543 / DSM 1740 / LMG 7466 / NCTC 11488 / FDC 602W) OX=273121 GN=WS0406 PE=4 SV=1	1.57822	0.277419
sp|Q7M7R1|RS9_WOLSU	WOLSU	3	30S ribosomal protein S9 OS=Wolinella succinogenes (strain ATCC 29543 / DSM 1740 / LMG 7466 / NCTC 11488 / FDC 602W) OX=273121 GN=rpsI PE=3 SV=1	1.57372	0.140531
sp|Q7MA20|ATPA_WOLSU	WOLSU	13	ATP synthase subunit alpha OS=Wolinella succinogenes (strain ATCC 29543 / DSM 1740 / LMG 7466 / NCTC 11488 / FDC 602W) OX=273121 GN=atpA PE=3 SV=1	1.55857	0.00500187
tr|Q7M7S7|Q7M7S7_WOLSU	WOLSU	1	Threonine synthase OS=Wolinella succinogenes (strain ATCC 29543 / DSM 1740 / LMG 7466 / NCTC 11488 / FDC 602W) OX=273121 GN=THRC PE=3 SV=1	1.53882	0.256529
sp|P60106|RL11_WOLSU	WOLSU	2	50S ribosomal protein L11 OS=Wolinella succinogenes (strain ATCC 29543 / DSM 1740 / LMG 7466 / NCTC 11488 / FDC 602W) OX=273121 GN=rplK PE=3 SV=1	1.52039	0.066091
sp|Q7M9C1|PGK_WOLSU	WOLSU	2	Phosphoglycerate kinase OS=Wolinella succinogenes (strain ATCC 29543 / DSM 1740 / LMG 7466 / NCTC 11488 / FDC 602W) OX=273121 GN=pgk PE=3 SV=1	1.50457	0.201916
sp|Q7M8Z5|RL9_WOLSU	WOLSU	2	50S ribosomal protein L9 OS=Wolinella succinogenes (strain ATCC 29543 / DSM 1740 / LMG 7466 / NCTC 11488 / FDC 602W) OX=273121 GN=rplI PE=3 SV=1	1.49439	0.184182
tr|Q7M8Q7|Q7M8Q7_WOLSU	WOLSU	7	ATP-DEPENDENT RNA HELICASE, DEAD-BOX FAMILY DEAD OS=Wolinella succinogenes (strain ATCC 29543 / DSM 1740 / LMG 7466 / NCTC 11488 / FDC 602W) OX=273121 GN=WS1482 PE=4 SV=1	1.47814	0.0443271
sp|Q7MA30|RL21_WOLSU	WOLSU	3	50S ribosomal protein L21 OS=Wolinella succinogenes (strain ATCC 29543 / DSM 1740 / LMG 7466 / NCTC 11488 / FDC 602W) OX=273121 GN=rplU PE=3 SV=1	1.47256	0.164631
tr|Q7M7R3|Q7M7R3_WOLSU	WOLSU	1	PYRUVATE:FERREDOXIN OXIDOREDUCTASE GAMMA SUBUNIT OS=Wolinella succinogenes (strain ATCC 29543 / DSM 1740 / LMG 7466 / NCTC 11488 / FDC 602W) OX=273121 GN=WS2132 PE=4 SV=1	1.44817	0.167922
tr|Q7MS65|Q7MS65_WOLSU	WOLSU	1	Asparaginase domain-containing protein OS=Wolinella succinogenes (strain ATCC 29543 / DSM 1740 / LMG 7466 / NCTC 11488 / FDC 602W) OX=273121 GN=WS0724 PE=4 SV=1	1.43482	0.275604
tr|Q7MQW8|Q7MQW8_WOLSU	WOLSU	1	Uncharacterized protein OS=Wolinella succinogenes (strain ATCC 29543 / DSM 1740 / LMG 7466 / NCTC 11488 / FDC 602W) OX=273121 GN=WS1946 PE=4 SV=1	1.42032	0.148358
sp|Q7M9X5|PUR7_WOLSU	WOLSU	4	Phosphoribosylaminoimidazole-succinocarboxamide synthase OS=Wolinella succinogenes (strain ATCC 29543 / DSM 1740 / LMG 7466 / NCTC 11488 / FDC 602W) OX=273121 GN=purC PE=3 SV=1	1.41505	0.0444165
sp|Q7M9L7|RL20_WOLSU	WOLSU	2	50S ribosomal protein L20 OS=Wolinella succinogenes (strain ATCC 29543 / DSM 1740 / LMG 7466 / NCTC 11488 / FDC 602W) OX=273121 GN=rplT PE=3 SV=1	1.40564	0.165717
tr|Q7M9P1|Q7M9P1_WOLSU	WOLSU	3	2,3,4,5-tetrahydropyridine-2,6-dicarboxylate N-succinyltransferase OS=Wolinella succinogenes (strain ATCC 29543 / DSM 1740 / LMG 7466 / NCTC 11488 / FDC 602W) OX=273121 GN=DAPD PE=3 SV=1	1.39806	0.0583085
tr|Q7MR22|Q7MR22_WOLSU	WOLSU	1	Uncharacterized protein OS=Wolinella succinogenes (strain ATCC 29543 / DSM 1740 / LMG 7466 / NCTC 11488 / FDC 602W) OX=273121 GN=WS1780 PE=4 SV=1	1.39244	0.490504
sp|Q7M8E0|RS3_WOLSU	WOLSU	4	30S ribosomal protein S3 OS=Wolinella succinogenes (strain ATCC 29543 / DSM 1740 / LMG 7466 / NCTC 11488 / FDC 602W) OX=273121 GN=rpsC PE=3 SV=1	1.38968	0.000915992
sp|Q7M7U7|RL25_WOLSU	WOLSU	6	50S ribosomal protein L25 OS=Wolinella succinogenes (strain ATCC 29543 / DSM 1740 / LMG 7466 / NCTC 11488 / FDC 602W) OX=273121 GN=rplY PE=3 SV=1	1.38762	0.0183747
tr|Q7MS92|Q7MS92_WOLSU	WOLSU	2	Uncharacterized protein OS=Wolinella succinogenes (strain ATCC 29543 / DSM 1740 / LMG 7466 / NCTC 11488 / FDC 602W) OX=273121 GN=WS0663 PE=4 SV=1	1.38241	0.203084
tr|Q7MST6|Q7MST6_WOLSU	WOLSU	2	Uncharacterized protein OS=Wolinella succinogenes (strain ATCC 29543 / DSM 1740 / LMG 7466 / NCTC 11488 / FDC 602W) OX=273121 GN=WS0149 PE=4 SV=1	1.37364	0.281354
tr|Q7M864|Q7M864_WOLSU	WOLSU	4	Superoxide dismutase OS=Wolinella succinogenes (strain ATCC 29543 / DSM 1740 / LMG 7466 / NCTC 11488 / FDC 602W) OX=273121 GN=WS1846 PE=3 SV=1	1.36807	0.19419
tr|Q7M8S3|Q7M8S3_WOLSU	WOLSU	4	Citrate synthase OS=Wolinella succinogenes (strain ATCC 29543 / DSM 1740 / LMG 7466 / NCTC 11488 / FDC 602W) OX=273121 GN=GLTA PE=3 SV=1	1.35369	0.276397
tr|Q7MSV9|Q7MSV9_WOLSU	WOLSU	1	Ribonuclease J OS=Wolinella succinogenes (strain ATCC 29543 / DSM 1740 / LMG 7466 / NCTC 11488 / FDC 602W) OX=273121 GN=rnj PE=3 SV=1	1.35089	0.349997
tr|Q7M9U5|Q7M9U5_WOLSU	WOLSU	3	Aspartate ammonia-lyase OS=Wolinella succinogenes (strain ATCC 29543 / DSM 1740 / LMG 7466 / NCTC 11488 / FDC 602W) OX=273121 GN=ASPA PE=3 SV=1	1.34019	0.35357
sp|Q7M8E7|RL6_WOLSU	WOLSU	4	50S ribosomal protein L6 OS=Wolinella succinogenes (strain ATCC 29543 / DSM 1740 / LMG 7466 / NCTC 11488 / FDC 602W) OX=273121 GN=rplF PE=3 SV=1	1.33349	0.280905
sp|Q7MAE3|CH60_WOLSU	WOLSU	17	60 kDa chaperonin OS=Wolinella succinogenes (strain ATCC 29543 / DSM 1740 / LMG 7466 / NCTC 11488 / FDC 602W) OX=273121 GN=groL PE=3 SV=1	1.32309	0.101741
tr|Q7M7M6|Q7M7M6_WOLSU	WOLSU	2	Cysteine desulfurase OS=Wolinella succinogenes (strain ATCC 29543 / DSM 1740 / LMG 7466 / NCTC 11488 / FDC 602W) OX=273121 GN=WS2206 PE=3 SV=1	1.32196	0.351557
tr|Q7M7U3|Q7M7U3_WOLSU	WOLSU	5	Histidine kinase OS=Wolinella succinogenes (strain ATCC 29543 / DSM 1740 / LMG 7466 / NCTC 11488 / FDC 602W) OX=273121 GN=CHEA PE=4 SV=1	1.31902	0.198385
sp|Q7M9L5|PURL_WOLSU	WOLSU	3	Phosphoribosylformylglycinamidine synthase subunit PurL OS=Wolinella succinogenes (strain ATCC 29543 / DSM 1740 / LMG 7466 / NCTC 11488 / FDC 602W) OX=273121 GN=purL PE=3 SV=1	1.31439	0.224325
tr|Q7M9C6|Q7M9C6_WOLSU	WOLSU	2	O-ACETYLHOMOSERINE SULFHYDRYLASE OS=Wolinella succinogenes (strain ATCC 29543 / DSM 1740 / LMG 7466 / NCTC 11488 / FDC 602W) OX=273121 GN=WS1015 PE=3 SV=1	1.31321	0.534305
sp|P27273|FDHB_WOLSU	WOLSU	8	Formate dehydrogenase iron-sulfur subunit OS=Wolinella succinogenes (strain ATCC 29543 / DSM 1740 / LMG 7466 / NCTC 11488 / FDC 602W) OX=273121 GN=fdhB1 PE=1 SV=1	1.28071	0.248714
sp|Q7M8F8|RL17_WOLSU	WOLSU	3	50S ribosomal protein L17 OS=Wolinella succinogenes (strain ATCC 29543 / DSM 1740 / LMG 7466 / NCTC 11488 / FDC 602W) OX=273121 GN=rplQ PE=3 SV=1	1.27664	0.3533
sp|Q7MA57|RL7_WOLSU	WOLSU	2	50S ribosomal protein L7/L12 OS=Wolinella succinogenes (strain ATCC 29543 / DSM 1740 / LMG 7466 / NCTC 11488 / FDC 602W) OX=273121 GN=rplL PE=3 SV=1	1.25865	0.610483
tr|Q7MAK7|Q7MAK7_WOLSU	WOLSU	6	Cbb3-type cytochrome c oxidase subunit OS=Wolinella succinogenes (strain ATCC 29543 / DSM 1740 / LMG 7466 / NCTC 11488 / FDC 602W) OX=273121 GN=CCOP PE=3 SV=1	1.2524	0.25541
tr|Q7MS49|Q7MS49_WOLSU	WOLSU	5	Uncharacterized protein OS=Wolinella succinogenes (strain ATCC 29543 / DSM 1740 / LMG 7466 / NCTC 11488 / FDC 602W) OX=273121 GN=WS0773 PE=4 SV=1	1.2491	0.259106
sp|P50286|ASPG_WOLSU	WOLSU	6	L-asparaginase OS=Wolinella succinogenes (strain ATCC 29543 / DSM 1740 / LMG 7466 / NCTC 11488 / FDC 602W) OX=273121 GN=ansA PE=1 SV=2	1.24361	0.420097
tr|Q7M9S3|Q7M9S3_WOLSU	WOLSU	3	Indolepyruvate oxidoreductase subunit IorA OS=Wolinella succinogenes (strain ATCC 29543 / DSM 1740 / LMG 7466 / NCTC 11488 / FDC 602W) OX=273121 GN=WS0714 PE=4 SV=1	1.20891	0.223615
tr|Q7M7Q2|Q7M7Q2_WOLSU	WOLSU	2	Ubiquinol-cytochrome c reductase iron-sulfur subunit OS=Wolinella succinogenes (strain ATCC 29543 / DSM 1740 / LMG 7466 / NCTC 11488 / FDC 602W) OX=273121 GN=PETA PE=3 SV=1	1.20444	0.460457
sp|Q7M8F5|RS11_WOLSU	WOLSU	1	30S ribosomal protein S11 OS=Wolinella succinogenes (strain ATCC 29543 / DSM 1740 / LMG 7466 / NCTC 11488 / FDC 602W) OX=273121 GN=rpsK PE=3 SV=1	1.2026	0.635685
sp|Q7M8E9|RS5_WOLSU	WOLSU	3	30S ribosomal protein S5 OS=Wolinella succinogenes (strain ATCC 29543 / DSM 1740 / LMG 7466 / NCTC 11488 / FDC 602W) OX=273121 GN=rpsE PE=3 SV=1	1.2021	0.380472
tr|Q7MSS3|Q7MSS3_WOLSU	WOLSU	1	Polyphosphate kinase OS=Wolinella succinogenes (strain ATCC 29543 / DSM 1740 / LMG 7466 / NCTC 11488 / FDC 602W) OX=273121 GN=WS0175 PE=3 SV=1	1.19661	0.428581
tr|Q7MS39|Q7MS39_WOLSU	WOLSU	1	Uncharacterized protein OS=Wolinella succinogenes (strain ATCC 29543 / DSM 1740 / LMG 7466 / NCTC 11488 / FDC 602W) OX=273121 GN=WS0802 PE=4 SV=1	1.1966	0.664848
tr|Q7M866|Q7M866_WOLSU	WOLSU	7	ALDEHYDE FERREDOXIN OXIDOREDUCTASE OS=Wolinella succinogenes (strain ATCC 29543 / DSM 1740 / LMG 7466 / NCTC 11488 / FDC 602W) OX=273121 GN=WS1844 PE=3 SV=1	1.19456	0.106375
tr|Q7M9Z6|Q7M9Z6_WOLSU	WOLSU	5	PUTATIVE TRANSCARBOXYLASE SUBUNIT OS=Wolinella succinogenes (strain ATCC 29543 / DSM 1740 / LMG 7466 / NCTC 11488 / FDC 602W) OX=273121 GN=WS0565 PE=4 SV=1	1.19137	0.20161
tr|Q7MRU7|Q7MRU7_WOLSU	WOLSU	3	CoA_binding domain-containing protein OS=Wolinella succinogenes (strain ATCC 29543 / DSM 1740 / LMG 7466 / NCTC 11488 / FDC 602W) OX=273121 GN=WS1029 PE=4 SV=1	1.19114	0.559886
tr|Q7MA62|Q7MA62_WOLSU	WOLSU	2	Amidophosphoribosyltransferase OS=Wolinella succinogenes (strain ATCC 29543 / DSM 1740 / LMG 7466 / NCTC 11488 / FDC 602W) OX=273121 GN=PURF PE=3 SV=1	1.18875	0.417824
tr|Q7M7U4|Q7M7U4_WOLSU	WOLSU	3	PURINE-BINDING CHEMOTAXIS PROTEIN CHEW OS=Wolinella succinogenes (strain ATCC 29543 / DSM 1740 / LMG 7466 / NCTC 11488 / FDC 602W) OX=273121 GN=WS2082 PE=4 SV=1	1.18176	0.527419
tr|Q7M8L0|Q7M8L0_WOLSU	WOLSU	1	Superoxide dismutase OS=Wolinella succinogenes (strain ATCC 29543 / DSM 1740 / LMG 7466 / NCTC 11488 / FDC 602W) OX=273121 GN=SODB PE=3 SV=1	1.18104	0.658651
tr|Q7MAV2|Q7MAV2_WOLSU	WOLSU	4	Beta sliding clamp OS=Wolinella succinogenes (strain ATCC 29543 / DSM 1740 / LMG 7466 / NCTC 11488 / FDC 602W) OX=273121 GN=DNAN PE=3 SV=1	1.17386	0.387111
sp|Q7M9X4|CLPB_WOLSU	WOLSU	10	Chaperone protein ClpB OS=Wolinella succinogenes (strain ATCC 29543 / DSM 1740 / LMG 7466 / NCTC 11488 / FDC 602W) OX=273121 GN=clpB PE=3 SV=1	1.16713	0.516011
tr|Q7MA64|Q7MA64_WOLSU	WOLSU	2	Thioredoxin reductase OS=Wolinella succinogenes (strain ATCC 29543 / DSM 1740 / LMG 7466 / NCTC 11488 / FDC 602W) OX=273121 GN=TRXB PE=3 SV=1	1.16671	0.5392
sp|Q7M8F6|RS4_WOLSU	WOLSU	8	30S ribosomal protein S4 OS=Wolinella succinogenes (strain ATCC 29543 / DSM 1740 / LMG 7466 / NCTC 11488 / FDC 602W) OX=273121 GN=rpsD PE=3 SV=1	1.16222	0.458465
sp|P31076|PSRB_WOLSU	WOLSU	1	Polysulfide reductase chain B OS=Wolinella succinogenes (strain ATCC 29543 / DSM 1740 / LMG 7466 / NCTC 11488 / FDC 602W) OX=273121 GN=psrB PE=4 SV=1	1.16057	0.651357
sp|Q7M8E6|RS8_WOLSU	WOLSU	2	30S ribosomal protein S8 OS=Wolinella succinogenes (strain ATCC 29543 / DSM 1740 / LMG 7466 / NCTC 11488 / FDC 602W) OX=273121 GN=rpsH PE=3 SV=1	1.15598	0.261306
tr|Q7MAB5|Q7MAB5_WOLSU	WOLSU	1	PUTATIVE PROCESSING PROTEASE OS=Wolinella succinogenes (strain ATCC 29543 / DSM 1740 / LMG 7466 / NCTC 11488 / FDC 602W) OX=273121 GN=WS0352 PE=3 SV=1	1.15472	0.632604
tr|Q7M8X4|Q7M8X4_WOLSU	WOLSU	2	PUTATIVE SIGNAL-TRANSDUCTION SENSOR PROTEIN OS=Wolinella succinogenes (strain ATCC 29543 / DSM 1740 / LMG 7466 / NCTC 11488 / FDC 602W) OX=273121 GN=WS1338 PE=4 SV=1	1.15458	0.633383
tr|Q7MAL2|Q7MAL2_WOLSU	WOLSU	10	MALIC ENZYME OS=Wolinella succinogenes (strain ATCC 29543 / DSM 1740 / LMG 7466 / NCTC 11488 / FDC 602W) OX=273121 GN=WS0171 PE=3 SV=1	1.15385	0.179724
sp|Q7M919|SECA_WOLSU	WOLSU	2	Protein translocase subunit SecA OS=Wolinella succinogenes (strain ATCC 29543 / DSM 1740 / LMG 7466 / NCTC 11488 / FDC 602W) OX=273121 GN=secA PE=3 SV=1	1.15287	0.270552
tr|Q79HP4|Q79HP4_WOLSU	WOLSU	5	SULFIDE DEHYDROGENASE OS=Wolinella succinogenes (strain ATCC 29543 / DSM 1740 / LMG 7466 / NCTC 11488 / FDC 602W) OX=273121 GN=SUD PE=4 SV=1	1.14838	0.647739
sp|Q7MA59|RL1_WOLSU	WOLSU	4	50S ribosomal protein L1 OS=Wolinella succinogenes (strain ATCC 29543 / DSM 1740 / LMG 7466 / NCTC 11488 / FDC 602W) OX=273121 GN=rplA PE=3 SV=1	1.14538	0.440582
sp|Q7MA55|RS12_WOLSU	WOLSU	2	30S ribosomal protein S12 OS=Wolinella succinogenes (strain ATCC 29543 / DSM 1740 / LMG 7466 / NCTC 11488 / FDC 602W) OX=273121 GN=rpsL PE=3 SV=1	1.14503	0.280955
sp|Q7M8H6|UPP_WOLSU	WOLSU	1	Uracil phosphoribosyltransferase OS=Wolinella succinogenes (strain ATCC 29543 / DSM 1740 / LMG 7466 / NCTC 11488 / FDC 602W) OX=273121 GN=upp PE=3 SV=1	1.14462	0.69004
sp|Q7MSR8|TATA_WOLSU	WOLSU	1	Sec-independent protein translocase protein TatA OS=Wolinella succinogenes (strain ATCC 29543 / DSM 1740 / LMG 7466 / NCTC 11488 / FDC 602W) OX=273121 GN=tatA PE=3 SV=1	1.14283	0.485498
sp|P31884|MBHS_WOLSU	WOLSU	9	Quinone-reactive Ni/Fe-hydrogenase small chain OS=Wolinella succinogenes (strain ATCC 29543 / DSM 1740 / LMG 7466 / NCTC 11488 / FDC 602W) OX=273121 GN=hydA PE=1 SV=2	1.13293	0.516909
sp|Q7MA19|ATPG_WOLSU	WOLSU	5	ATP synthase gamma chain OS=Wolinella succinogenes (strain ATCC 29543 / DSM 1740 / LMG 7466 / NCTC 11488 / FDC 602W) OX=273121 GN=atpG PE=3 SV=1	1.13216	0.555825
sp|Q7M7P6|ASSY_WOLSU	WOLSU	7	Argininosuccinate synthase OS=Wolinella succinogenes (strain ATCC 29543 / DSM 1740 / LMG 7466 / NCTC 11488 / FDC 602W) OX=273121 GN=argG PE=3 SV=1	1.12992	0.45173
tr|Q7M9W6|Q7M9W6_WOLSU	WOLSU	1	ATP-dependent zinc metalloprotease FtsH OS=Wolinella succinogenes (strain ATCC 29543 / DSM 1740 / LMG 7466 / NCTC 11488 / FDC 602W) OX=273121 GN=FTSH PE=3 SV=1	1.12899	0.763734
sp|Q7M904|EFP_WOLSU	WOLSU	3	Elongation factor P OS=Wolinella succinogenes (strain ATCC 29543 / DSM 1740 / LMG 7466 / NCTC 11488 / FDC 602W) OX=273121 GN=efp PE=3 SV=1	1.11373	0.52645
sp|Q7MA53|EFG_WOLSU	WOLSU	21	Elongation factor G OS=Wolinella succinogenes (strain ATCC 29543 / DSM 1740 / LMG 7466 / NCTC 11488 / FDC 602W) OX=273121 GN=fusA PE=3 SV=1	1.10674	0.639996
tr|Q7MAA7|Q7MAA7_WOLSU	WOLSU	5	Aspartate-semialdehyde dehydrogenase OS=Wolinella succinogenes (strain ATCC 29543 / DSM 1740 / LMG 7466 / NCTC 11488 / FDC 602W) OX=273121 GN=asd PE=3 SV=1	1.10258	0.600542
tr|Q7M9L6|Q7M9L6_WOLSU	WOLSU	6	Phosphoenolpyruvate synthase OS=Wolinella succinogenes (strain ATCC 29543 / DSM 1740 / LMG 7466 / NCTC 11488 / FDC 602W) OX=273121 GN=WS0826 PE=3 SV=1	1.10068	0.645668
tr|Q7M8K8|Q7M8K8_WOLSU	WOLSU	3	NEUTROPHIL-ACTIVATING PROTEIN (NEUTROPHIL ACTIVATING PROTEIN NAPA)(FRAGMENT) OS=Wolinella succinogenes (strain ATCC 29543 / DSM 1740 / LMG 7466 / NCTC 11488 / FDC 602W) OX=273121 GN=NAPA PE=3 SV=1	1.10054	0.78762
sp|P42482|EFTU_WOLSU	WOLSU	21	Elongation factor Tu OS=Wolinella succinogenes (strain ATCC 29543 / DSM 1740 / LMG 7466 / NCTC 11488 / FDC 602W) OX=273121 GN=tuf PE=3 SV=2	1.09918	0.682141
sp|Q7M8E5|RL5_WOLSU	WOLSU	3	50S ribosomal protein L5 OS=Wolinella succinogenes (strain ATCC 29543 / DSM 1740 / LMG 7466 / NCTC 11488 / FDC 602W) OX=273121 GN=rplE PE=3 SV=1	1.08972	0.546011
sp|Q7M8E2|RS17_WOLSU	WOLSU	5	30S ribosomal protein S17 OS=Wolinella succinogenes (strain ATCC 29543 / DSM 1740 / LMG 7466 / NCTC 11488 / FDC 602W) OX=273121 GN=rpsQ PE=3 SV=1	1.08938	0.853606
tr|Q7MAJ6|Q7MAJ6_WOLSU	WOLSU	2	WBGX PROTEIN OS=Wolinella succinogenes (strain ATCC 29543 / DSM 1740 / LMG 7466 / NCTC 11488 / FDC 602W) OX=273121 GN=WBGX PE=3 SV=1	1.08477	0.588828
sp|Q7M7X5|IF2_WOLSU	WOLSU	1	Translation initiation factor IF-2 OS=Wolinella succinogenes (strain ATCC 29543 / DSM 1740 / LMG 7466 / NCTC 11488 / FDC 602W) OX=273121 GN=infB PE=3 SV=1	1.0834	0.86254
tr|Q7MRJ3|Q7MRJ3_WOLSU	WOLSU	5	SHSP domain-containing protein OS=Wolinella succinogenes (strain ATCC 29543 / DSM 1740 / LMG 7466 / NCTC 11488 / FDC 602W) OX=273121 GN=WS1299 PE=3 SV=1	1.08274	0.371476
sp|Q7MA35|DNAK_WOLSU	WOLSU	22	Chaperone protein DnaK OS=Wolinella succinogenes (strain ATCC 29543 / DSM 1740 / LMG 7466 / NCTC 11488 / FDC 602W) OX=273121 GN=dnaK PE=3 SV=1	1.08249	0.752809
tr|Q7MSU0|Q7MSU0_WOLSU	WOLSU	7	Lar_N domain-containing protein OS=Wolinella succinogenes (strain ATCC 29543 / DSM 1740 / LMG 7466 / NCTC 11488 / FDC 602W) OX=273121 GN=WS0140 PE=4 SV=1	1.08145	0.585278
tr|Q7M802|Q7M802_WOLSU	WOLSU	1	Lon protease OS=Wolinella succinogenes (strain ATCC 29543 / DSM 1740 / LMG 7466 / NCTC 11488 / FDC 602W) OX=273121 GN=lon PE=2 SV=1	1.07752	0.7629
sp|Q7M7Q9|ARGB_WOLSU	WOLSU	1	Acetylglutamate kinase OS=Wolinella succinogenes (strain ATCC 29543 / DSM 1740 / LMG 7466 / NCTC 11488 / FDC 602W) OX=273121 GN=argB PE=3 SV=1	1.0759	0.692814
sp|Q7M8D5|RL4_WOLSU	WOLSU	3	50S ribosomal protein L4 OS=Wolinella succinogenes (strain ATCC 29543 / DSM 1740 / LMG 7466 / NCTC 11488 / FDC 602W) OX=273121 GN=rplD PE=3 SV=1	1.07501	0.752345
tr|Q7MA13|Q7MA13_WOLSU	WOLSU	1	5'-methylthioadenosine/S-adenosylhomocysteine nucleosidase OS=Wolinella succinogenes (strain ATCC 29543 / DSM 1740 / LMG 7466 / NCTC 11488 / FDC 602W) OX=273121 GN=PFS PE=4 SV=1	1.06799	0.891239
tr|Q7M7R5|Q7M7R5_WOLSU	WOLSU	1	PYRUVATE SYNTHASE ALPHA SUBUNIT OS=Wolinella succinogenes (strain ATCC 29543 / DSM 1740 / LMG 7466 / NCTC 11488 / FDC 602W) OX=273121 GN=WS2130 PE=4 SV=1	1.06743	0.750502
sp|Q7M8F7|RPOA_WOLSU	WOLSU	7	DNA-directed RNA polymerase subunit alpha OS=Wolinella succinogenes (strain ATCC 29543 / DSM 1740 / LMG 7466 / NCTC 11488 / FDC 602W) OX=273121 GN=rpoA PE=3 SV=1	1.06425	0.667813
sp|Q7M825|MFRE_WOLSU	WOLSU	2	8-methylmenaquinol:fumarate reductase membrane anchor subunit OS=Wolinella succinogenes (strain ATCC 29543 / DSM 1740 / LMG 7466 / NCTC 11488 / FDC 602W) OX=273121 GN=sdhE PE=1 SV=1	1.06158	0.883493
tr|Q7MA94|Q7MA94_WOLSU	WOLSU	3	ALDEHYDE OXIDOREDUCTASE OS=Wolinella succinogenes (strain ATCC 29543 / DSM 1740 / LMG 7466 / NCTC 11488 / FDC 602W) OX=273121 GN=glnH PE=3 SV=1	1.05943	0.81106
sp|Q7MAN4|ILVD_WOLSU	WOLSU	1	Dihydroxy-acid dehydratase OS=Wolinella succinogenes (strain ATCC 29543 / DSM 1740 / LMG 7466 / NCTC 11488 / FDC 602W) OX=273121 GN=ilvD PE=3 SV=1	1.05802	0.880982
tr|Q7MSM9|Q7MSM9_WOLSU	WOLSU	16	LINOCIN M18 OS=Wolinella succinogenes (strain ATCC 29543 / DSM 1740 / LMG 7466 / NCTC 11488 / FDC 602W) OX=273121 GN=WS0287 PE=4 SV=1	1.05657	0.849702
sp|Q7MAR0|GLYA_WOLSU	WOLSU	3	Serine hydroxymethyltransferase OS=Wolinella succinogenes (strain ATCC 29543 / DSM 1740 / LMG 7466 / NCTC 11488 / FDC 602W) OX=273121 GN=glyA PE=3 SV=1	1.0549	0.696111
tr|Q7M7Q7|Q7M7Q7_WOLSU	WOLSU	1	Carbamoyl-phosphate synthase large chain OS=Wolinella succinogenes (strain ATCC 29543 / DSM 1740 / LMG 7466 / NCTC 11488 / FDC 602W) OX=273121 GN=CARB PE=3 SV=1	1.0476	0.939204
sp|Q7M9F6|THIG_WOLSU	WOLSU	1	Thiazole synthase OS=Wolinella succinogenes (strain ATCC 29543 / DSM 1740 / LMG 7466 / NCTC 11488 / FDC 602W) OX=273121 GN=thiG PE=3 SV=1	1.04546	0.932706
tr|Q7MR55|Q7MR55_WOLSU	WOLSU	6	Uncharacterized protein OS=Wolinella succinogenes (strain ATCC 29543 / DSM 1740 / LMG 7466 / NCTC 11488 / FDC 602W) OX=273121 GN=fliD PE=4 SV=1	1.04444	0.856146
tr|Q7M7R4|Q7M7R4_WOLSU	WOLSU	1	PYRUVATE FERREDOXIN OXIDOREDUCTASE, DELTA SUBUNIT OS=Wolinella succinogenes (strain ATCC 29543 / DSM 1740 / LMG 7466 / NCTC 11488 / FDC 602W) OX=273121 GN=WS2131 PE=4 SV=1	1.0393	0.88367
tr|Q7MR36|Q7MR36_WOLSU	WOLSU	5	Uncharacterized protein OS=Wolinella succinogenes (strain ATCC 29543 / DSM 1740 / LMG 7466 / NCTC 11488 / FDC 602W) OX=273121 GN=WS1756 PE=4 SV=1	1.03471	0.801097
tr|Q7M8Y4|Q7M8Y4_WOLSU	WOLSU	5	D-3-phosphoglycerate dehydrogenase OS=Wolinella succinogenes (strain ATCC 29543 / DSM 1740 / LMG 7466 / NCTC 11488 / FDC 602W) OX=273121 GN=SERA PE=3 SV=1	1.03102	0.859162
sp|Q7MAR1|SYK_WOLSU	WOLSU	1	Lysine--tRNA ligase OS=Wolinella succinogenes (strain ATCC 29543 / DSM 1740 / LMG 7466 / NCTC 11488 / FDC 602W) OX=273121 GN=lysS PE=3 SV=1	1.02855	0.939142
sp|Q7M8E3|RL14_WOLSU	WOLSU	1	50S ribosomal protein L14 OS=Wolinella succinogenes (strain ATCC 29543 / DSM 1740 / LMG 7466 / NCTC 11488 / FDC 602W) OX=273121 GN=rplN PE=3 SV=1	1.02777	0.937887
tr|Q7MQL2|Q7MQL2_WOLSU	WOLSU	3	YceI domain-containing protein OS=Wolinella succinogenes (strain ATCC 29543 / DSM 1740 / LMG 7466 / NCTC 11488 / FDC 602W) OX=273121 GN=WS2216 PE=4 SV=1	1.01697	0.919768
tr|Q7MRL4|Q7MRL4_WOLSU	WOLSU	3	Uncharacterized protein OS=Wolinella succinogenes (strain ATCC 29543 / DSM 1740 / LMG 7466 / NCTC 11488 / FDC 602W) OX=273121 GN=WS1240 PE=4 SV=1	1.01644	0.961107
tr|Q7MAV1|Q7MAV1_WOLSU	WOLSU	3	DNA gyrase subunit B OS=Wolinella succinogenes (strain ATCC 29543 / DSM 1740 / LMG 7466 / NCTC 11488 / FDC 602W) OX=273121 GN=gyrB PE=3 SV=1	1.01517	0.888013
sp|Q7M8Y8|SYFB_WOLSU	WOLSU	1	Phenylalanine--tRNA ligase beta subunit OS=Wolinella succinogenes (strain ATCC 29543 / DSM 1740 / LMG 7466 / NCTC 11488 / FDC 602W) OX=273121 GN=pheT PE=3 SV=1	1.00685	0.966407
tr|Q7MQQ1|Q7MQQ1_WOLSU	WOLSU	1	Uncharacterized protein OS=Wolinella succinogenes (strain ATCC 29543 / DSM 1740 / LMG 7466 / NCTC 11488 / FDC 602W) OX=273121 GN=WS2104 PE=4 SV=1	1.005	0.987935
sp|Q7MAS2|FABZ_WOLSU	WOLSU	2	3-hydroxyacyl-[acyl-carrier-protein] dehydratase FabZ OS=Wolinella succinogenes (strain ATCC 29543 / DSM 1740 / LMG 7466 / NCTC 11488 / FDC 602W) OX=273121 GN=fabZ PE=3 SV=1	1.00371	0.988376
tr|Q7M8K4|Q7M8K4_WOLSU	WOLSU	4	Thiol peroxidase OS=Wolinella succinogenes (strain ATCC 29543 / DSM 1740 / LMG 7466 / NCTC 11488 / FDC 602W) OX=273121 GN=tpx PE=3 SV=1	1.00053	0.997125
tr|Q7M7Q8|Q7M7Q8_WOLSU	WOLSU	1	PUTATIVE D-2-HYDROXYACID DEHYDROGENASE OS=Wolinella succinogenes (strain ATCC 29543 / DSM 1740 / LMG 7466 / NCTC 11488 / FDC 602W) OX=273121 GN=WS2143 PE=3 SV=1	1.00009	0.999661
sp|P31075|PSRA_WOLSU	WOLSU	10	Polysulfide reductase chain A OS=Wolinella succinogenes (strain ATCC 29543 / DSM 1740 / LMG 7466 / NCTC 11488 / FDC 602W) OX=273121 GN=psrA PE=1 SV=1	0.997978	0.986615
tr|Q7MQN0|Q7MQN0_WOLSU	WOLSU	1	Ribosom_S30AE_C domain-containing protein OS=Wolinella succinogenes (strain ATCC 29543 / DSM 1740 / LMG 7466 / NCTC 11488 / FDC 602W) OX=273121 GN=WS2170 PE=4 SV=1	0.993521	0.988746
sp|Q7MAE2|CH10_WOLSU	WOLSU	2	10 kDa chaperonin OS=Wolinella succinogenes (strain ATCC 29543 / DSM 1740 / LMG 7466 / NCTC 11488 / FDC 602W) OX=273121 GN=groS PE=3 SV=1	0.991958	0.989035
sp|Q7M851|ILVC_WOLSU	WOLSU	8	Ketol-acid reductoisomerase (NADP(+)) OS=Wolinella succinogenes (strain ATCC 29543 / DSM 1740 / LMG 7466 / NCTC 11488 / FDC 602W) OX=273121 GN=ilvC PE=3 SV=1	0.991528	0.924003
tr|Q7M7L0|Q7M7L0_WOLSU	WOLSU	27	FORMATE DEHYDROGENASE OS=Wolinella succinogenes (strain ATCC 29543 / DSM 1740 / LMG 7466 / NCTC 11488 / FDC 602W) OX=273121 GN=FDHA PE=4 SV=2	0.989225	0.943923
tr|Q7M7L8|Q7M7L8_WOLSU	WOLSU	1	DHOdehase OS=Wolinella succinogenes (strain ATCC 29543 / DSM 1740 / LMG 7466 / NCTC 11488 / FDC 602W) OX=273121 GN=PYRD PE=3 SV=1	0.987656	0.953184
tr|Q7MRG7|Q7MRG7_WOLSU	WOLSU	1	Uncharacterized protein OS=Wolinella succinogenes (strain ATCC 29543 / DSM 1740 / LMG 7466 / NCTC 11488 / FDC 602W) OX=273121 GN=WS1377 PE=4 SV=1	0.984479	0.941917
tr|Q7M8V6|Q7M8V6_WOLSU	WOLSU	2	NON-HAEM IRON PROTEIN OS=Wolinella succinogenes (strain ATCC 29543 / DSM 1740 / LMG 7466 / NCTC 11488 / FDC 602W) OX=273121 GN=WS1374 PE=4 SV=1	0.979651	0.931784
tr|Q7MRI3|Q7MRI3_WOLSU	WOLSU	7	Rhodanese domain-containing protein OS=Wolinella succinogenes (strain ATCC 29543 / DSM 1740 / LMG 7466 / NCTC 11488 / FDC 602W) OX=273121 GN=WS1327 PE=4 SV=1	0.975947	0.855772
tr|Q7MS08|Q7MS08_WOLSU	WOLSU	1	Cytochrome c domain-containing protein OS=Wolinella succinogenes (strain ATCC 29543 / DSM 1740 / LMG 7466 / NCTC 11488 / FDC 602W) OX=273121 GN=WS0892 PE=4 SV=1	0.974851	0.923244
tr|Q7M7M7|Q7M7M7_WOLSU	WOLSU	2	Nitrogen fixation protein NifU OS=Wolinella succinogenes (strain ATCC 29543 / DSM 1740 / LMG 7466 / NCTC 11488 / FDC 602W) OX=273121 GN=WS2205 PE=3 SV=1	0.971929	0.899713
sp|Q7MA56|RPOBC_WOLSU	WOLSU	19	Bifunctional DNA-directed RNA polymerase subunit beta-beta' OS=Wolinella succinogenes (strain ATCC 29543 / DSM 1740 / LMG 7466 / NCTC 11488 / FDC 602W) OX=273121 GN=rpoBC PE=3 SV=1	0.965213	0.757809
tr|Q7M9C4|Q7M9C4_WOLSU	WOLSU	1	Glyceraldehyde-3-phosphate dehydrogenase OS=Wolinella succinogenes (strain ATCC 29543 / DSM 1740 / LMG 7466 / NCTC 11488 / FDC 602W) OX=273121 GN=GAP_2 PE=3 SV=1	0.945462	0.849726
tr|Q7MAK8|Q7MAK8_WOLSU	WOLSU	6	CB-TYPE CYTOCHROME C OXIDASE SUBUNIT II OS=Wolinella succinogenes (strain ATCC 29543 / DSM 1740 / LMG 7466 / NCTC 11488 / FDC 602W) OX=273121 GN=CCOO PE=4 SV=1	0.942841	0.618392
sp|Q7M8F4|RS13_WOLSU	WOLSU	4	30S ribosomal protein S13 OS=Wolinella succinogenes (strain ATCC 29543 / DSM 1740 / LMG 7466 / NCTC 11488 / FDC 602W) OX=273121 GN=rpsM PE=3 SV=1	0.941349	0.818692
tr|Q7MS17|Q7MS17_WOLSU	WOLSU	1	Sec-independent protein translocase protein TatB OS=Wolinella succinogenes (strain ATCC 29543 / DSM 1740 / LMG 7466 / NCTC 11488 / FDC 602W) OX=273121 GN=tatB PE=3 SV=1	0.941097	0.922659
tr|Q7MRW0|Q7MRW0_WOLSU	WOLSU	3	Uncharacterized protein OS=Wolinella succinogenes (strain ATCC 29543 / DSM 1740 / LMG 7466 / NCTC 11488 / FDC 602W) OX=273121 GN=WS1001 PE=3 SV=1	0.939237	0.874251
sp|Q7M7M4|TIG_WOLSU	WOLSU	9	Trigger factor OS=Wolinella succinogenes (strain ATCC 29543 / DSM 1740 / LMG 7466 / NCTC 11488 / FDC 602W) OX=273121 GN=tig PE=3 SV=1	0.938092	0.617699
sp|Q7M7Z2|METK_WOLSU	WOLSU	11	S-adenosylmethionine synthase OS=Wolinella succinogenes (strain ATCC 29543 / DSM 1740 / LMG 7466 / NCTC 11488 / FDC 602W) OX=273121 GN=metK PE=3 SV=1	0.932746	0.59994
sp|P59933|SSB_WOLSU	WOLSU	1	Single-stranded DNA-binding protein OS=Wolinella succinogenes (strain ATCC 29543 / DSM 1740 / LMG 7466 / NCTC 11488 / FDC 602W) OX=273121 GN=ssb PE=3 SV=1	0.930185	0.869949
tr|Q7M8X5|Q7M8X5_WOLSU	WOLSU	2	PUTATIVE MCP-DOMAIN SIGNAL TRANSDUCTION PROTEIN OS=Wolinella succinogenes (strain ATCC 29543 / DSM 1740 / LMG 7466 / NCTC 11488 / FDC 602W) OX=273121 GN=WS1337 PE=4 SV=1	0.927161	0.839339
sp|Q7MR59|FLIW1_WOLSU	WOLSU	1	Flagellar assembly factor FliW 1 OS=Wolinella succinogenes (strain ATCC 29543 / DSM 1740 / LMG 7466 / NCTC 11488 / FDC 602W) OX=273121 GN=fliW1 PE=3 SV=1	0.925178	0.572671
tr|Q7MS87|Q7MS87_WOLSU	WOLSU	1	Ribosomal silencing factor RsfS OS=Wolinella succinogenes (strain ATCC 29543 / DSM 1740 / LMG 7466 / NCTC 11488 / FDC 602W) OX=273121 GN=rsfS PE=3 SV=1	0.917283	0.629574
sp|Q7MAD8|RRF_WOLSU	WOLSU	2	Ribosome-recycling factor OS=Wolinella succinogenes (strain ATCC 29543 / DSM 1740 / LMG 7466 / NCTC 11488 / FDC 602W) OX=273121 GN=frr PE=3 SV=1	0.915814	0.774618
tr|Q7MR23|Q7MR23_WOLSU	WOLSU	8	Uncharacterized protein OS=Wolinella succinogenes (strain ATCC 29543 / DSM 1740 / LMG 7466 / NCTC 11488 / FDC 602W) OX=273121 GN=WS1779 PE=4 SV=1	0.914661	0.704692
sp|Q7MQV6|FLIW2_WOLSU	WOLSU	1	Flagellar assembly factor FliW 2 OS=Wolinella succinogenes (strain ATCC 29543 / DSM 1740 / LMG 7466 / NCTC 11488 / FDC 602W) OX=273121 GN=fliW2 PE=3 SV=1	0.907528	0.839721
tr|Q7MSR7|Q7MSR7_WOLSU	WOLSU	3	Uncharacterized protein OS=Wolinella succinogenes (strain ATCC 29543 / DSM 1740 / LMG 7466 / NCTC 11488 / FDC 602W) OX=273121 GN=WS0189 PE=4 SV=1	0.907438	0.663457
sp|Q7M8D6|RL23_WOLSU	WOLSU	1	50S ribosomal protein L23 OS=Wolinella succinogenes (strain ATCC 29543 / DSM 1740 / LMG 7466 / NCTC 11488 / FDC 602W) OX=273121 GN=rplW PE=3 SV=1	0.904747	0.864384
sp|Q7M8D4|RL3_WOLSU	WOLSU	2	50S ribosomal protein L3 OS=Wolinella succinogenes (strain ATCC 29543 / DSM 1740 / LMG 7466 / NCTC 11488 / FDC 602W) OX=273121 GN=rplC PE=3 SV=1	0.902928	0.72797
tr|Q7MAG8|Q7MAG8_WOLSU	WOLSU	3	PUTATIVE CHEMOTAXIS PROTEIN OS=Wolinella succinogenes (strain ATCC 29543 / DSM 1740 / LMG 7466 / NCTC 11488 / FDC 602W) OX=273121 GN=CHEV_1 PE=4 SV=1	0.896987	0.724649
tr|Q7MSR4|Q7MSR4_WOLSU	WOLSU	1	Rhodanese domain-containing protein OS=Wolinella succinogenes (strain ATCC 29543 / DSM 1740 / LMG 7466 / NCTC 11488 / FDC 602W) OX=273121 GN=flhB PE=4 SV=1	0.896939	0.815582
tr|Q7M8V9|Q7M8V9_WOLSU	WOLSU	13	PUTATIVE PERIPLASMIC PROTEIN OS=Wolinella succinogenes (strain ATCC 29543 / DSM 1740 / LMG 7466 / NCTC 11488 / FDC 602W) OX=273121 GN=WS1370 PE=1 SV=1	0.896761	0.389964
sp|Q7M7Z3|NDK_WOLSU	WOLSU	5	Nucleoside diphosphate kinase OS=Wolinella succinogenes (strain ATCC 29543 / DSM 1740 / LMG 7466 / NCTC 11488 / FDC 602W) OX=273121 GN=ndk PE=3 SV=1	0.895066	0.555768
sp|Q7MAK1|EFTS_WOLSU	WOLSU	8	Elongation factor Ts OS=Wolinella succinogenes (strain ATCC 29543 / DSM 1740 / LMG 7466 / NCTC 11488 / FDC 602W) OX=273121 GN=tsf PE=3 SV=1	0.88982	0.361322
tr|Q7MSG6|Q7MSG6_WOLSU	WOLSU	6	Thioredoxin OS=Wolinella succinogenes (strain ATCC 29543 / DSM 1740 / LMG 7466 / NCTC 11488 / FDC 602W) OX=273121 GN=TRXA PE=3 SV=1	0.887748	0.724611
sp|Q7MAK0|RS2_WOLSU	WOLSU	9	30S ribosomal protein S2 OS=Wolinella succinogenes (strain ATCC 29543 / DSM 1740 / LMG 7466 / NCTC 11488 / FDC 602W) OX=273121 GN=rpsB PE=3 SV=1	0.88027	0.565288
tr|Q7M9S7|Q7M9S7_WOLSU	WOLSU	7	MOLYBDOPTERIN OXIDOREDUCTASE, IRON-SULFUR BINDING SUBUNIT OS=Wolinella succinogenes (strain ATCC 29543 / DSM 1740 / LMG 7466 / NCTC 11488 / FDC 602W) OX=273121 GN=WS0708 PE=4 SV=1	0.878056	0.570307
tr|Q7M9R6|Q7M9R6_WOLSU	WOLSU	4	PUTATIVE FERREDOXIN OS=Wolinella succinogenes (strain ATCC 29543 / DSM 1740 / LMG 7466 / NCTC 11488 / FDC 602W) OX=273121 GN=WS0730 PE=4 SV=1	0.872248	0.181144
tr|Q7MSB3|Q7MSB3_WOLSU	WOLSU	4	PROTEASE OS=Wolinella succinogenes (strain ATCC 29543 / DSM 1740 / LMG 7466 / NCTC 11488 / FDC 602W) OX=273121 GN=WS0608 PE=3 SV=1	0.861629	0.69147
sp|Q7MA34|GRPE_WOLSU	WOLSU	1	Protein GrpE OS=Wolinella succinogenes (strain ATCC 29543 / DSM 1740 / LMG 7466 / NCTC 11488 / FDC 602W) OX=273121 GN=grpE PE=3 SV=1	0.851036	0.704809
tr|Q7M8Y5|Q7M8Y5_WOLSU	WOLSU	14	30S RIBOSOMAL PROTEIN S1 OS=Wolinella succinogenes (strain ATCC 29543 / DSM 1740 / LMG 7466 / NCTC 11488 / FDC 602W) OX=273121 GN=RPSA PE=4 SV=1	0.843057	0.162452
tr|Q7M9J3|Q7M9J3_WOLSU	WOLSU	2	TRANSCRIPTIONAL REGULATOR (LYSR FAMILY) OS=Wolinella succinogenes (strain ATCC 29543 / DSM 1740 / LMG 7466 / NCTC 11488 / FDC 602W) OX=273121 GN=LYSR1 PE=3 SV=1	0.838903	0.603199
sp|Q7M8E4|RL24_WOLSU	WOLSU	2	50S ribosomal protein L24 OS=Wolinella succinogenes (strain ATCC 29543 / DSM 1740 / LMG 7466 / NCTC 11488 / FDC 602W) OX=273121 GN=rplX PE=3 SV=2	0.837805	0.327202
tr|Q7MSU7|Q7MSU7_WOLSU	WOLSU	4	PHB domain-containing protein OS=Wolinella succinogenes (strain ATCC 29543 / DSM 1740 / LMG 7466 / NCTC 11488 / FDC 602W) OX=273121 GN=WS0091 PE=3 SV=1	0.828097	0.377108
sp|Q7M9I4|PNP_WOLSU	WOLSU	2	Polyribonucleotide nucleotidyltransferase OS=Wolinella succinogenes (strain ATCC 29543 / DSM 1740 / LMG 7466 / NCTC 11488 / FDC 602W) OX=273121 GN=pnp PE=3 SV=1	0.827858	0.502225
tr|Q7M8B9|Q7M8B9_WOLSU	WOLSU	4	PROTEIN DISULPHIDE ISOMERASE OS=Wolinella succinogenes (strain ATCC 29543 / DSM 1740 / LMG 7466 / NCTC 11488 / FDC 602W) OX=273121 GN=WS1747 PE=4 SV=1	0.823245	0.131254
tr|Q7MQP7|Q7MQP7_WOLSU	WOLSU	4	zf-RING_7 domain-containing protein OS=Wolinella succinogenes (strain ATCC 29543 / DSM 1740 / LMG 7466 / NCTC 11488 / FDC 602W) OX=273121 GN=WS2117 PE=3 SV=1	0.820871	0.660829
tr|Q7M814|Q7M814_WOLSU	WOLSU	1	Lipoprotein OS=Wolinella succinogenes (strain ATCC 29543 / DSM 1740 / LMG 7466 / NCTC 11488 / FDC 602W) OX=273121 GN=WS1945 PE=3 SV=1	0.820752	0.690158
tr|Q7M9R3|Q7M9R3_WOLSU	WOLSU	21	ORF7 PROTEIN OS=Wolinella succinogenes (strain ATCC 29543 / DSM 1740 / LMG 7466 / NCTC 11488 / FDC 602W) OX=273121 GN=WS0739 PE=3 SV=1	0.816301	0.359048
tr|Q7M8C7|Q7M8C7_WOLSU	WOLSU	3	Aspartokinase OS=Wolinella succinogenes (strain ATCC 29543 / DSM 1740 / LMG 7466 / NCTC 11488 / FDC 602W) OX=273121 GN=LYSC PE=3 SV=1	0.810125	0.579045
tr|Q7M9S6|Q7M9S6_WOLSU	WOLSU	28	THIOSULFATE REDUCTASE OS=Wolinella succinogenes (strain ATCC 29543 / DSM 1740 / LMG 7466 / NCTC 11488 / FDC 602W) OX=273121 GN=fdhA PE=3 SV=1	0.805652	0.307254
tr|Q7MSN6|Q7MSN6_WOLSU	WOLSU	1	PGBA_N domain-containing protein OS=Wolinella succinogenes (strain ATCC 29543 / DSM 1740 / LMG 7466 / NCTC 11488 / FDC 602W) OX=273121 GN=WS0266 PE=4 SV=1	0.801927	0.381865
tr|Q7MAA4|Q7MAA4_WOLSU	WOLSU	2	EXTRACELLULAR SOLUTE-BINDING PROTEIN, PUTATIVE OS=Wolinella succinogenes (strain ATCC 29543 / DSM 1740 / LMG 7466 / NCTC 11488 / FDC 602W) OX=273121 GN=WS0373 PE=3 SV=1	0.801194	0.582451
sp|P31875|CYBH_WOLSU	WOLSU	1	Quinone-reactive Ni/Fe-hydrogenase B-type cytochrome subunit OS=Wolinella succinogenes (strain ATCC 29543 / DSM 1740 / LMG 7466 / NCTC 11488 / FDC 602W) OX=273121 GN=hydC PE=1 SV=1	0.799738	0.544011
tr|Q7MAP0|Q7MAP0_WOLSU	WOLSU	12	FLAVOCYTOCHROME C FLAVIN SUBUNIT OS=Wolinella succinogenes (strain ATCC 29543 / DSM 1740 / LMG 7466 / NCTC 11488 / FDC 602W) OX=273121 GN=FCCA PE=3 SV=1	0.795836	0.203895
tr|Q7MR24|Q7MR24_WOLSU	WOLSU	2	HP0268 domain-containing protein OS=Wolinella succinogenes (strain ATCC 29543 / DSM 1740 / LMG 7466 / NCTC 11488 / FDC 602W) OX=273121 GN=WS1777 PE=4 SV=1	0.794173	0.669578
sp|Q7MQZ9|RS18_WOLSU	WOLSU	1	30S ribosomal protein S18 OS=Wolinella succinogenes (strain ATCC 29543 / DSM 1740 / LMG 7466 / NCTC 11488 / FDC 602W) OX=273121 GN=rpsR PE=3 SV=1	0.793462	0.596206
tr|Q7MAG0|Q7MAG0_WOLSU	WOLSU	2	BINDING COMPONENT OF ABC TRANSPORTER OS=Wolinella succinogenes (strain ATCC 29543 / DSM 1740 / LMG 7466 / NCTC 11488 / FDC 602W) OX=273121 GN=WS0279 PE=1 SV=1	0.791035	0.589769
tr|Q7M7R9|Q7M7R9_WOLSU	WOLSU	14	GLUTAMINE SYNTHETASE OS=Wolinella succinogenes (strain ATCC 29543 / DSM 1740 / LMG 7466 / NCTC 11488 / FDC 602W) OX=273121 GN=GLNA PE=3 SV=1	0.789263	0.0598573
tr|Q7MST0|Q7MST0_WOLSU	WOLSU	2	SurA_N domain-containing protein OS=Wolinella succinogenes (strain ATCC 29543 / DSM 1740 / LMG 7466 / NCTC 11488 / FDC 602W) OX=273121 GN=WS0160 PE=4 SV=1	0.785454	0.0946211
tr|Q7M876|Q7M876_WOLSU	WOLSU	3	PUTATIVE ACYL-CoA DEHYDROGENASE OS=Wolinella succinogenes (strain ATCC 29543 / DSM 1740 / LMG 7466 / NCTC 11488 / FDC 602W) OX=273121 GN=FADE16 PE=3 SV=1	0.783752	0.273044
tr|Q7MSF2|Q7MSF2_WOLSU	WOLSU	6	Peptidoglycan-associated protein OS=Wolinella succinogenes (strain ATCC 29543 / DSM 1740 / LMG 7466 / NCTC 11488 / FDC 602W) OX=273121 GN=OMP18 PE=3 SV=1	0.779036	0.544761
tr|Q7MAJ9|Q7MAJ9_WOLSU	WOLSU	1	Thioredoxin peroxidase OS=Wolinella succinogenes (strain ATCC 29543 / DSM 1740 / LMG 7466 / NCTC 11488 / FDC 602W) OX=273121 GN=BCP PE=4 SV=1	0.777758	0.66246
tr|Q7MAE4|Q7MAE4_WOLSU	WOLSU	2	TWO-COMPONENT REGULATOR OS=Wolinella succinogenes (strain ATCC 29543 / DSM 1740 / LMG 7466 / NCTC 11488 / FDC 602W) OX=273121 GN=WS0306 PE=4 SV=1	0.775494	0.457299
tr|Q7M8B0|Q7M8B0_WOLSU	WOLSU	7	50S ribosomal subunit assembly factor BipA OS=Wolinella succinogenes (strain ATCC 29543 / DSM 1740 / LMG 7466 / NCTC 11488 / FDC 602W) OX=273121 GN=TYPA PE=3 SV=1	0.771069	0.216908
sp|Q7M7L6|DAPA_WOLSU	WOLSU	3	4-hydroxy-tetrahydrodipicolinate synthase OS=Wolinella succinogenes (strain ATCC 29543 / DSM 1740 / LMG 7466 / NCTC 11488 / FDC 602W) OX=273121 GN=dapA PE=3 SV=1	0.768997	0.331812
tr|Q7MSN0|Q7MSN0_WOLSU	WOLSU	5	Uncharacterized protein OS=Wolinella succinogenes (strain ATCC 29543 / DSM 1740 / LMG 7466 / NCTC 11488 / FDC 602W) OX=273121 GN=WS0286 PE=4 SV=1	0.766636	0.135244
sp|Q7MAF0|RISB_WOLSU	WOLSU	2	6,7-dimethyl-8-ribityllumazine synthase OS=Wolinella succinogenes (strain ATCC 29543 / DSM 1740 / LMG 7466 / NCTC 11488 / FDC 602W) OX=273121 GN=ribH PE=3 SV=1	0.760497	0.10001
sp|Q7M8J0|KPRS_WOLSU	WOLSU	2	Ribose-phosphate pyrophosphokinase OS=Wolinella succinogenes (strain ATCC 29543 / DSM 1740 / LMG 7466 / NCTC 11488 / FDC 602W) OX=273121 GN=prs PE=3 SV=1	0.755616	0.428194
sp|Q7MA21|ATPD_WOLSU	WOLSU	1	ATP synthase subunit delta OS=Wolinella succinogenes (strain ATCC 29543 / DSM 1740 / LMG 7466 / NCTC 11488 / FDC 602W) OX=273121 GN=atpH PE=3 SV=1	0.755548	0.490628
tr|Q7M8S2|Q7M8S2_WOLSU	WOLSU	3	Isocitrate dehydrogenase [NADP] OS=Wolinella succinogenes (strain ATCC 29543 / DSM 1740 / LMG 7466 / NCTC 11488 / FDC 602W) OX=273121 GN=WS1454 PE=4 SV=1	0.75394	0.66289
tr|Q7MR11|Q7MR11_WOLSU	WOLSU	1	Uncharacterized protein OS=Wolinella succinogenes (strain ATCC 29543 / DSM 1740 / LMG 7466 / NCTC 11488 / FDC 602W) OX=273121 GN=WS1830 PE=4 SV=1	0.748086	0.765586
tr|Q7M8N4|Q7M8N4_WOLSU	WOLSU	14	L-TARTRATE DEHYDRATASE, SUBUNIT A OS=Wolinella succinogenes (strain ATCC 29543 / DSM 1740 / LMG 7466 / NCTC 11488 / FDC 602W) OX=273121 GN=WS1530 PE=3 SV=1	0.742235	0.0823975
tr|Q7MSA6|Q7MSA6_WOLSU	WOLSU	31	Uncharacterized protein OS=Wolinella succinogenes (strain ATCC 29543 / DSM 1740 / LMG 7466 / NCTC 11488 / FDC 602W) OX=273121 GN=WS0627 PE=4 SV=1	0.735904	0.261775
tr|Q7MAF8|Q7MAF8_WOLSU	WOLSU	2	PUTATIVE METHYL-ACCEPTING CHEMOTAXIS PROTEIN OS=Wolinella succinogenes (strain ATCC 29543 / DSM 1740 / LMG 7466 / NCTC 11488 / FDC 602W) OX=273121 GN=WS0281 PE=4 SV=1	0.73526	0.223996
tr|Q7MAU2|Q7MAU2_WOLSU	WOLSU	1	ASPARTATE AMINOTRANSFERASE OS=Wolinella succinogenes (strain ATCC 29543 / DSM 1740 / LMG 7466 / NCTC 11488 / FDC 602W) OX=273121 GN=WS0024 PE=3 SV=1	0.732898	0.161541
sp|Q7M8I0|PURT_WOLSU	WOLSU	1	Formate-dependent phosphoribosylglycinamide formyltransferase OS=Wolinella succinogenes (strain ATCC 29543 / DSM 1740 / LMG 7466 / NCTC 11488 / FDC 602W) OX=273121 GN=purT PE=3 SV=1	0.732162	0.293101
tr|Q7MRQ7|Q7MRQ7_WOLSU	WOLSU	1	ORF2 OS=Wolinella succinogenes (strain ATCC 29543 / DSM 1740 / LMG 7466 / NCTC 11488 / FDC 602W) OX=273121 GN=WS1127 PE=4 SV=1	0.731329	0.54432
tr|Q79HP6|Q79HP6_WOLSU	WOLSU	27	Flagellin OS=Wolinella succinogenes (strain ATCC 29543 / DSM 1740 / LMG 7466 / NCTC 11488 / FDC 602W) OX=273121 GN=FLAG PE=3 SV=1	0.726845	0.433042
tr|Q7M9S4|Q7M9S4_WOLSU	WOLSU	1	FERREDOXIN OXIDOREDUCTASE OS=Wolinella succinogenes (strain ATCC 29543 / DSM 1740 / LMG 7466 / NCTC 11488 / FDC 602W) OX=273121 GN=WS0713 PE=4 SV=1	0.722387	0.401181
tr|Q7MAQ7|Q7MAQ7_WOLSU	WOLSU	2	Branched-chain-amino-acid aminotransferase OS=Wolinella succinogenes (strain ATCC 29543 / DSM 1740 / LMG 7466 / NCTC 11488 / FDC 602W) OX=273121 GN=ILVE PE=3 SV=1	0.721165	0.228113
tr|Q7M902|Q7M902_WOLSU	WOLSU	5	CELL BINDING FACTOR 2 MAJOR ANTIGEN PEB4A OS=Wolinella succinogenes (strain ATCC 29543 / DSM 1740 / LMG 7466 / NCTC 11488 / FDC 602W) OX=273121 GN=WS1281 PE=4 SV=1	0.714946	0.0833004
tr|Q7MS99|Q7MS99_WOLSU	WOLSU	7	Uncharacterized protein OS=Wolinella succinogenes (strain ATCC 29543 / DSM 1740 / LMG 7466 / NCTC 11488 / FDC 602W) OX=273121 GN=WS0645 PE=4 SV=1	0.709791	0.377556
tr|Q7M817|Q7M817_WOLSU	WOLSU	3	Iron-sulfur cluster carrier protein OS=Wolinella succinogenes (strain ATCC 29543 / DSM 1740 / LMG 7466 / NCTC 11488 / FDC 602W) OX=273121 GN=MRP PE=3 SV=1	0.706885	0.432956
sp|Q7M8Q0|ENO_WOLSU	WOLSU	4	Enolase OS=Wolinella succinogenes (strain ATCC 29543 / DSM 1740 / LMG 7466 / NCTC 11488 / FDC 602W) OX=273121 GN=eno PE=3 SV=1	0.706287	0.46149
tr|Q7MSG9|Q7MSG9_WOLSU	WOLSU	3	Uncharacterized protein OS=Wolinella succinogenes (strain ATCC 29543 / DSM 1740 / LMG 7466 / NCTC 11488 / FDC 602W) OX=273121 GN=WS0447 PE=4 SV=1	0.703613	0.497172
tr|Q7MA15|Q7MA15_WOLSU	WOLSU	2	Peptidyl-prolyl cis-trans isomerase OS=Wolinella succinogenes (strain ATCC 29543 / DSM 1740 / LMG 7466 / NCTC 11488 / FDC 602W) OX=273121 GN=SLYD PE=3 SV=1	0.703127	0.371387
sp|Q7M7V8|PURA_WOLSU	WOLSU	3	Adenylosuccinate synthetase OS=Wolinella succinogenes (strain ATCC 29543 / DSM 1740 / LMG 7466 / NCTC 11488 / FDC 602W) OX=273121 GN=purA PE=3 SV=1	0.683108	0.191409
tr|Q7MAQ5|Q7MAQ5_WOLSU	WOLSU	2	METHYL-ACCEPTING CHEMOTAXIS PROTEIN II OS=Wolinella succinogenes (strain ATCC 29543 / DSM 1740 / LMG 7466 / NCTC 11488 / FDC 602W) OX=273121 GN=WS0094 PE=4 SV=1	0.681993	0.188408
tr|Q7MS84|Q7MS84_WOLSU	WOLSU	1	RHH_1 domain-containing protein OS=Wolinella succinogenes (strain ATCC 29543 / DSM 1740 / LMG 7466 / NCTC 11488 / FDC 602W) OX=273121 GN=WS0673 PE=4 SV=1	0.676324	0.101147
tr|Q7MRG8|Q7MRG8_WOLSU	WOLSU	4	Uncharacterized protein OS=Wolinella succinogenes (strain ATCC 29543 / DSM 1740 / LMG 7466 / NCTC 11488 / FDC 602W) OX=273121 GN=WS1373 PE=4 SV=1	0.671489	0.139422
sp|Q7M886|LEU3_WOLSU	WOLSU	1	3-isopropylmalate dehydrogenase OS=Wolinella succinogenes (strain ATCC 29543 / DSM 1740 / LMG 7466 / NCTC 11488 / FDC 602W) OX=273121 GN=leuB PE=3 SV=1	0.665184	0.230839
sp|Q7MA54|RS7_WOLSU	WOLSU	2	30S ribosomal protein S7 OS=Wolinella succinogenes (strain ATCC 29543 / DSM 1740 / LMG 7466 / NCTC 11488 / FDC 602W) OX=273121 GN=rpsG PE=3 SV=1	0.659964	0.28436
sp|Q7M8A6|SYDND_WOLSU	WOLSU	1	Aspartate--tRNA(Asp/Asn) ligase OS=Wolinella succinogenes (strain ATCC 29543 / DSM 1740 / LMG 7466 / NCTC 11488 / FDC 602W) OX=273121 GN=aspS PE=3 SV=1	0.658477	0.213001
tr|Q7M823|Q7M823_WOLSU	WOLSU	5	Glutamate dehydrogenase OS=Wolinella succinogenes (strain ATCC 29543 / DSM 1740 / LMG 7466 / NCTC 11488 / FDC 602W) OX=273121 GN=gdhA PE=3 SV=1	0.658392	0.11926
tr|Q7M7L2|Q7M7L2_WOLSU	WOLSU	7	Periplasmic serine endoprotease DegP-like OS=Wolinella succinogenes (strain ATCC 29543 / DSM 1740 / LMG 7466 / NCTC 11488 / FDC 602W) OX=273121 GN=HTRA PE=3 SV=1	0.642735	0.0229154
tr|Q7M8B3|Q7M8B3_WOLSU	WOLSU	2	Flagellar hook protein FlgE OS=Wolinella succinogenes (strain ATCC 29543 / DSM 1740 / LMG 7466 / NCTC 11488 / FDC 602W) OX=273121 GN=FLGE PE=3 SV=1	0.64082	0.216145
tr|Q7M9D6|Q7M9D6_WOLSU	WOLSU	10	TONB-DEPENDENT RECEPTOR OS=Wolinella succinogenes (strain ATCC 29543 / DSM 1740 / LMG 7466 / NCTC 11488 / FDC 602W) OX=273121 GN=WS0993 PE=3 SV=1	0.629475	0.177861
sp|Q7M8A5|KAD_WOLSU	WOLSU	6	Adenylate kinase OS=Wolinella succinogenes (strain ATCC 29543 / DSM 1740 / LMG 7466 / NCTC 11488 / FDC 602W) OX=273121 GN=adk PE=3 SV=1	0.628282	0.336767
tr|Q7M7U2|Q7M7U2_WOLSU	WOLSU	3	CHEMOTAXIS PROTEIN EC 2.7.3 OS=Wolinella succinogenes (strain ATCC 29543 / DSM 1740 / LMG 7466 / NCTC 11488 / FDC 602W) OX=273121 GN=CHEV PE=4 SV=1	0.625088	0.053374
tr|Q7M8A9|Q7M8A9_WOLSU	WOLSU	1	Ribonucleoside-diphosphate reductase OS=Wolinella succinogenes (strain ATCC 29543 / DSM 1740 / LMG 7466 / NCTC 11488 / FDC 602W) OX=273121 GN=NRDA PE=3 SV=1	0.624754	0.308215
tr|Q7M903|Q7M903_WOLSU	WOLSU	4	FRUCTOSE-BISPHOSPHATE ALDOLASE OS=Wolinella succinogenes (strain ATCC 29543 / DSM 1740 / LMG 7466 / NCTC 11488 / FDC 602W) OX=273121 GN=WS1280 PE=4 SV=1	0.613964	0.240575
tr|Q7M9R9|Q7M9R9_WOLSU	WOLSU	1	PROTON/GLUTAMATE SYMPORTER OS=Wolinella succinogenes (strain ATCC 29543 / DSM 1740 / LMG 7466 / NCTC 11488 / FDC 602W) OX=273121 GN=WS0722 PE=4 SV=1	0.611706	0.381535
tr|Q7MSL5|Q7MSL5_WOLSU	WOLSU	2	Uncharacterized protein OS=Wolinella succinogenes (strain ATCC 29543 / DSM 1740 / LMG 7466 / NCTC 11488 / FDC 602W) OX=273121 GN=WS0331 PE=4 SV=1	0.601978	0.259751
sp|Q7M8C4|HTPG_WOLSU	WOLSU	1	Chaperone protein HtpG OS=Wolinella succinogenes (strain ATCC 29543 / DSM 1740 / LMG 7466 / NCTC 11488 / FDC 602W) OX=273121 GN=htpG PE=3 SV=1	0.595836	0.260294
tr|Q7MAM3|Q7MAM3_WOLSU	WOLSU	1	Flagellar hook-associated protein 2 OS=Wolinella succinogenes (strain ATCC 29543 / DSM 1740 / LMG 7466 / NCTC 11488 / FDC 602W) OX=273121 GN=fliD PE=3 SV=1	0.592745	0.121946
tr|Q7MSQ2|Q7MSQ2_WOLSU	WOLSU	2	PpiC domain-containing protein OS=Wolinella succinogenes (strain ATCC 29543 / DSM 1740 / LMG 7466 / NCTC 11488 / FDC 602W) OX=273121 GN=WS0233 PE=4 SV=1	0.59174	0.10205
tr|Q7M7N1|Q7M7N1_WOLSU	WOLSU	2	Flagellin OS=Wolinella succinogenes (strain ATCC 29543 / DSM 1740 / LMG 7466 / NCTC 11488 / FDC 602W) OX=273121 GN=FLAB PE=3 SV=1	0.591403	0.0166163
tr|Q7M850|Q7M850_WOLSU	WOLSU	1	Cell division inhibitor MinD OS=Wolinella succinogenes (strain ATCC 29543 / DSM 1740 / LMG 7466 / NCTC 11488 / FDC 602W) OX=273121 GN=MIND PE=3 SV=1	0.588985	0.134803
tr|Q7MAB6|Q7MAB6_WOLSU	WOLSU	3	Outer membrane protein assembly factor BamA OS=Wolinella succinogenes (strain ATCC 29543 / DSM 1740 / LMG 7466 / NCTC 11488 / FDC 602W) OX=273121 GN=bamA PE=3 SV=1	0.588092	0.0708564
tr|Q7MQP4|Q7MQP4_WOLSU	WOLSU	1	Uncharacterized protein OS=Wolinella succinogenes (strain ATCC 29543 / DSM 1740 / LMG 7466 / NCTC 11488 / FDC 602W) OX=273121 GN=WS2123 PE=4 SV=1	0.57446	0.277172
tr|Q7M7P5|Q7M7P5_WOLSU	WOLSU	1	Phosphoribosylformylglycinamidine cyclo-ligase OS=Wolinella succinogenes (strain ATCC 29543 / DSM 1740 / LMG 7466 / NCTC 11488 / FDC 602W) OX=273121 GN=PURM PE=3 SV=1	0.571223	0.103839
sp|Q9S1E5|NRFA_WOLSU	WOLSU	3	Cytochrome c-552 OS=Wolinella succinogenes (strain ATCC 29543 / DSM 1740 / LMG 7466 / NCTC 11488 / FDC 602W) OX=273121 GN=nrfA PE=1 SV=2	0.569585	0.378497
tr|Q7MSR2|Q7MSR2_WOLSU	WOLSU	4	CADF OS=Wolinella succinogenes (strain ATCC 29543 / DSM 1740 / LMG 7466 / NCTC 11488 / FDC 602W) OX=273121 GN=CADF PE=4 SV=1	0.569431	0.136863
sp|Q7M8U8|NIFH_WOLSU	WOLSU	2	Nitrogenase iron protein OS=Wolinella succinogenes (strain ATCC 29543 / DSM 1740 / LMG 7466 / NCTC 11488 / FDC 602W) OX=273121 GN=nifH PE=3 SV=1	0.566265	0.0272812
tr|Q7MAG1|Q7MAG1_WOLSU	WOLSU	2	BINDING PROTEIN COMPONENT ABC TRANSPORTER OS=Wolinella succinogenes (strain ATCC 29543 / DSM 1740 / LMG 7466 / NCTC 11488 / FDC 602W) OX=273121 GN=WS0278 PE=3 SV=1	0.56494	0.124486
sp|Q7MSD9|RS16_WOLSU	WOLSU	1	30S ribosomal protein S16 OS=Wolinella succinogenes (strain ATCC 29543 / DSM 1740 / LMG 7466 / NCTC 11488 / FDC 602W) OX=273121 GN=rpsP PE=3 SV=1	0.562261	0.279449
sp|Q7MQZ8|RS6_WOLSU	WOLSU	4	30S ribosomal protein S6 OS=Wolinella succinogenes (strain ATCC 29543 / DSM 1740 / LMG 7466 / NCTC 11488 / FDC 602W) OX=273121 GN=rpsF PE=3 SV=1	0.561627	0.218151
tr|Q7M9U2|Q7M9U2_WOLSU	WOLSU	1	GLYCERO-MANNOHEPTOSE-EPIMERASE OS=Wolinella succinogenes (strain ATCC 29543 / DSM 1740 / LMG 7466 / NCTC 11488 / FDC 602W) OX=273121 GN=GMHD PE=4 SV=1	0.55346	0.228064
sp|Q7M9L9|IF3_WOLSU	WOLSU	1	Translation initiation factor IF-3 OS=Wolinella succinogenes (strain ATCC 29543 / DSM 1740 / LMG 7466 / NCTC 11488 / FDC 602W) OX=273121 GN=infC PE=3 SV=1	0.552845	0.296544
tr|Q7MRG5|Q7MRG5_WOLSU	WOLSU	1	2Fe-2S ferredoxin-type domain-containing protein OS=Wolinella succinogenes (strain ATCC 29543 / DSM 1740 / LMG 7466 / NCTC 11488 / FDC 602W) OX=273121 GN=WS1382 PE=4 SV=1	0.525489	0.136319
tr|Q7M951|Q7M951_WOLSU	WOLSU	1	MOLYBDENUM COFACTOR BIOSYNTHESIS MOG OS=Wolinella succinogenes (strain ATCC 29543 / DSM 1740 / LMG 7466 / NCTC 11488 / FDC 602W) OX=273121 GN=MOG PE=4 SV=1	0.523904	0.270465
sp|Q7MSU1|Y139_WOLSU	WOLSU	1	Putative nickel insertion protein OS=Wolinella succinogenes (strain ATCC 29543 / DSM 1740 / LMG 7466 / NCTC 11488 / FDC 602W) OX=273121 GN=WS0139 PE=3 SV=1	0.514695	0.154997
sp|Q7M8D7|RL2_WOLSU	WOLSU	2	50S ribosomal protein L2 OS=Wolinella succinogenes (strain ATCC 29543 / DSM 1740 / LMG 7466 / NCTC 11488 / FDC 602W) OX=273121 GN=rplB PE=3 SV=1	0.514651	0.469999
sp|Q7M8D9|RL22_WOLSU	WOLSU	1	50S ribosomal protein L22 OS=Wolinella succinogenes (strain ATCC 29543 / DSM 1740 / LMG 7466 / NCTC 11488 / FDC 602W) OX=273121 GN=rplV PE=3 SV=1	0.51354	0.231313
sp|Q7M9J5|SYS_WOLSU	WOLSU	1	Serine--tRNA ligase OS=Wolinella succinogenes (strain ATCC 29543 / DSM 1740 / LMG 7466 / NCTC 11488 / FDC 602W) OX=273121 GN=serS PE=3 SV=1	0.510232	0.387193
tr|Q7MR06|Q7MR06_WOLSU	WOLSU	1	DsbG_N domain-containing protein OS=Wolinella succinogenes (strain ATCC 29543 / DSM 1740 / LMG 7466 / NCTC 11488 / FDC 602W) OX=273121 GN=WS1847 PE=4 SV=1	0.510086	0.14411
tr|Q7M9B6|Q7M9B6_WOLSU	WOLSU	2	OLIGOENDOPEPTIDASE F (PEPF) OS=Wolinella succinogenes (strain ATCC 29543 / DSM 1740 / LMG 7466 / NCTC 11488 / FDC 602W) OX=273121 GN=WS1038 PE=3 SV=1	0.508407	0.229819
tr|Q7MS72|Q7MS72_WOLSU	WOLSU	1	Cytochrome c domain-containing protein OS=Wolinella succinogenes (strain ATCC 29543 / DSM 1740 / LMG 7466 / NCTC 11488 / FDC 602W) OX=273121 GN=WS0700 PE=4 SV=1	0.508319	0.104984
tr|Q7M930|Q7M930_WOLSU	WOLSU	1	PUTATIVE TONB-DEPENDENT RECEPTOR OS=Wolinella succinogenes (strain ATCC 29543 / DSM 1740 / LMG 7466 / NCTC 11488 / FDC 602W) OX=273121 GN=WS1232 PE=3 SV=1	0.499893	0.451783
sp|Q7M9N2|GREA_WOLSU	WOLSU	1	Transcription elongation factor GreA OS=Wolinella succinogenes (strain ATCC 29543 / DSM 1740 / LMG 7466 / NCTC 11488 / FDC 602W) OX=273121 GN=greA PE=3 SV=1	0.498403	0.185635
tr|Q7MS73|Q7MS73_WOLSU	WOLSU	1	Uncharacterized protein OS=Wolinella succinogenes (strain ATCC 29543 / DSM 1740 / LMG 7466 / NCTC 11488 / FDC 602W) OX=273121 GN=WS0695 PE=4 SV=1	0.493337	0.106695
tr|Q79HR6|Q79HR6_WOLSU	WOLSU	1	Usp domain-containing protein OS=Wolinella succinogenes (strain ATCC 29543 / DSM 1740 / LMG 7466 / NCTC 11488 / FDC 602W) OX=273121 GN=WS0834 PE=3 SV=1	0.487609	0.0984905
tr|Q7M8P4|Q7M8P4_WOLSU	WOLSU	1	NAD(P)H-FLAVIN OXIDOREDUCTASE OS=Wolinella succinogenes (strain ATCC 29543 / DSM 1740 / LMG 7466 / NCTC 11488 / FDC 602W) OX=273121 GN=WS1508 PE=3 SV=1	0.48542	0.165845
tr|Q7MA32|Q7MA32_WOLSU	WOLSU	1	PUTATIVE DNA-BINDING PROTEIN II (HB) OS=Wolinella succinogenes (strain ATCC 29543 / DSM 1740 / LMG 7466 / NCTC 11488 / FDC 602W) OX=273121 GN=HU PE=3 SV=1	0.481541	0.386434
tr|Q7MAM5|Q7MAM5_WOLSU	WOLSU	1	PUTATIVE FIBRONECTIN DOMAIN-CONTAINING LIPOPROTEIN OS=Wolinella succinogenes (strain ATCC 29543 / DSM 1740 / LMG 7466 / NCTC 11488 / FDC 602W) OX=273121 GN=WS0144 PE=4 SV=1	0.466758	0.170295
tr|Q7M967|Q7M967_WOLSU	WOLSU	1	OLIGOPEPTIDE BINDING PROTEIN OS=Wolinella succinogenes (strain ATCC 29543 / DSM 1740 / LMG 7466 / NCTC 11488 / FDC 602W) OX=273121 GN=WS1160 PE=4 SV=1	0.451072	0.0839078
sp|Q7MA16|TOLB_WOLSU	WOLSU	5	Tol-Pal system protein TolB OS=Wolinella succinogenes (strain ATCC 29543 / DSM 1740 / LMG 7466 / NCTC 11488 / FDC 602W) OX=273121 GN=tolB PE=3 SV=1	0.444059	0.0408174
tr|Q7MAL8|Q7MAL8_WOLSU	WOLSU	1	PUTATIVE 2 OS=Wolinella succinogenes (strain ATCC 29543 / DSM 1740 / LMG 7466 / NCTC 11488 / FDC 602W) OX=273121 GN=cysE PE=3 SV=1	0.424512	0.197895
tr|Q7M8A3|Q7M8A3_WOLSU	WOLSU	6	Inorganic pyrophosphatase OS=Wolinella succinogenes (strain ATCC 29543 / DSM 1740 / LMG 7466 / NCTC 11488 / FDC 602W) OX=273121 GN=PPA PE=3 SV=1	0.421291	0.227272
sp|Q7M9W1|ACP_WOLSU	WOLSU	1	Acyl carrier protein OS=Wolinella succinogenes (strain ATCC 29543 / DSM 1740 / LMG 7466 / NCTC 11488 / FDC 602W) OX=273121 GN=acpP PE=3 SV=1	0.416699	0.00968851
tr|Q7M9Q9|Q7M9Q9_WOLSU	WOLSU	3	IMMUNOGENIC PROTEIN OS=Wolinella succinogenes (strain ATCC 29543 / DSM 1740 / LMG 7466 / NCTC 11488 / FDC 602W) OX=273121 GN=WS0748 PE=4 SV=1	0.415835	0.149048
tr|Q7M8N5|Q7M8N5_WOLSU	WOLSU	7	L-TARTRATE DEHYDRATASE, SUBUNIT B OS=Wolinella succinogenes (strain ATCC 29543 / DSM 1740 / LMG 7466 / NCTC 11488 / FDC 602W) OX=273121 GN=accA PE=3 SV=1	0.41352	0.310534
tr|Q7M7V5|Q7M7V5_WOLSU	WOLSU	1	FLAA1 PROTEIN OS=Wolinella succinogenes (strain ATCC 29543 / DSM 1740 / LMG 7466 / NCTC 11488 / FDC 602W) OX=273121 GN=WS2061 PE=3 SV=1	0.411787	0.1945
tr|Q7MS62|Q7MS62_WOLSU	WOLSU	1	Uncharacterized protein OS=Wolinella succinogenes (strain ATCC 29543 / DSM 1740 / LMG 7466 / NCTC 11488 / FDC 602W) OX=273121 GN=WS0732 PE=4 SV=1	0.38269	0.179896
tr|Q7MAA9|Q7MAA9_WOLSU	WOLSU	1	DNA gyrase subunit A OS=Wolinella succinogenes (strain ATCC 29543 / DSM 1740 / LMG 7466 / NCTC 11488 / FDC 602W) OX=273121 GN=gyrA PE=3 SV=1	0.373097	0.179277
tr|Q7MQN1|Q7MQN1_WOLSU	WOLSU	1	Uncharacterized protein OS=Wolinella succinogenes (strain ATCC 29543 / DSM 1740 / LMG 7466 / NCTC 11488 / FDC 602W) OX=273121 GN=WS2167 PE=4 SV=1	0.360479	0.161802
sp|Q7MA03|RL19_WOLSU	WOLSU	2	50S ribosomal protein L19 OS=Wolinella succinogenes (strain ATCC 29543 / DSM 1740 / LMG 7466 / NCTC 11488 / FDC 602W) OX=273121 GN=rplS PE=3 SV=1	0.349315	0.203755
sp|Q7MSA5|RS21_WOLSU	WOLSU	1	30S ribosomal protein S21 OS=Wolinella succinogenes (strain ATCC 29543 / DSM 1740 / LMG 7466 / NCTC 11488 / FDC 602W) OX=273121 GN=rpsU PE=3 SV=1	0.311486	0.197581
sp|Q7MAC9|ARGJ_WOLSU	WOLSU	1	Arginine biosynthesis bifunctional protein ArgJ OS=Wolinella succinogenes (strain ATCC 29543 / DSM 1740 / LMG 7466 / NCTC 11488 / FDC 602W) OX=273121 GN=argJ PE=3 SV=1	0.309939	0.056786
tr|Q7MSE7|Q7MSE7_WOLSU	WOLSU	2	Uncharacterized protein OS=Wolinella succinogenes (strain ATCC 29543 / DSM 1740 / LMG 7466 / NCTC 11488 / FDC 602W) OX=273121 GN=WS0532 PE=4 SV=1	0.295369	0.0256507
tr|Q7M999|Q7M999_WOLSU	WOLSU	2	Biotin carboxyl carrier protein of acetyl-CoA carboxylase OS=Wolinella succinogenes (strain ATCC 29543 / DSM 1740 / LMG 7466 / NCTC 11488 / FDC 602W) OX=273121 GN=ACCB PE=4 SV=1	0.283458	0.0326595
sp|Q7MSH1|RL31_WOLSU	WOLSU	1	50S ribosomal protein L31 OS=Wolinella succinogenes (strain ATCC 29543 / DSM 1740 / LMG 7466 / NCTC 11488 / FDC 602W) OX=273121 GN=rpmE PE=3 SV=1	0.273791	0.112414
tr|Q7MR04|Q7MR04_WOLSU	WOLSU	3	Nitro_FeMo-Co domain-containing protein OS=Wolinella succinogenes (strain ATCC 29543 / DSM 1740 / LMG 7466 / NCTC 11488 / FDC 602W) OX=273121 GN=WS1855 PE=4 SV=1	0.233089	0.000115283
tr|Q7MQL9|Q7MQL9_WOLSU	WOLSU	1	Methyltransf_11 domain-containing protein OS=Wolinella succinogenes (strain ATCC 29543 / DSM 1740 / LMG 7466 / NCTC 11488 / FDC 602W) OX=273121 GN=WS2195 PE=4 SV=1	0.202339	0.362661
tr|Q7MSV3|Q7MSV3_WOLSU	WOLSU	2	Uncharacterized protein OS=Wolinella succinogenes (strain ATCC 29543 / DSM 1740 / LMG 7466 / NCTC 11488 / FDC 602W) OX=273121 GN=WS0076 PE=4 SV=1	0.0309783	0.0502676
