# Supplementary material for: Elucidating metabolic tuning of mixed purple phototrophic bacteria biofilms in photoheterotrophic conditions through microbial photo-electrosynthesis
Source: Research Square preprint supplement (doi:10.21203/rs.3.rs-2467581/v1), 2023-06-26
Supplement: Supplementary file 4 [file f99afb4b2527561a24516343.xlsx]

## Sheet: 0.4V vs. OC
ID_PROT	# peptides	Name	0,4V/0V	p value
tr|A0A318TK44|A0A318TK44_9BRAD	1	(R)-citramalate synthase OS=Rhodopseudomonas faecalis OX=99655 GN=BJ122_102312 PE=3 SV=1	0.475303	4.2744e-05
tr|A0A1D9MAE0|A0A1D9MAE0_9RHOB	1	10 kDa chaperonin OS=Rhodobacter sp. LPB0142 OX=1850250 GN=groS PE=3 SV=1	2.64987	3.01331e-05
tr|A0A3G6WLS2|A0A3G6WLS2_RHOSH	1	10 kDa chaperonin OS=Rhodobacter sphaeroides OX=1063 GN=groS PE=3 SV=1	5.62212	0.00171774
tr|A0A318U076|A0A318U076_9BRAD	3	10 kDa chaperonin OS=Rhodopseudomonas faecalis OX=99655 GN=groS PE=3 SV=1	3.34459	1.086e-05
tr|A0A318TUC7|A0A318TUC7_9BRAD	2	1-deoxy-D-xylulose 5-phosphate reductoisomerase OS=Rhodopseudomonas faecalis OX=99655 GN=dxr PE=3 SV=1	0.604114	0.0465621
tr|A0A318T6Z1|A0A318T6Z1_9BRAD	1	2,3,4,5-tetrahydropyridine-2,6-dicarboxylate N-succinyltransferase OS=Rhodopseudomonas faecalis OX=99655 GN=dapD PE=3 SV=1	1.91894	0.00192158
tr|Q7M9P1|Q7M9P1_WOLSU	1	2,3,4,5-tetrahydropyridine-2,6-dicarboxylate N-succinyltransferase OS=Wolinella succinogenes (strain ATCC 29543 / DSM 1740 / LMG 7466 / NCTC 11488 / FDC 602W) OX=273121 GN=DAPD PE=3 SV=1	1.73243	0.0176929
tr|A0A318TBU7|A0A318TBU7_9BRAD	1	2,3-bisphosphoglycerate-dependent phosphoglycerate mutase OS=Rhodopseudomonas faecalis OX=99655 GN=gpmA PE=3 SV=1	1.75529	0.000277067
tr|G2H893|G2H893_9DELT	1	2-amino-3,7-dideoxy-D-threo-hept-6-ulosonate synthase OS=Desulfovibrio sp. A2 OX=298701 GN=griI PE=3 SV=1	0.286062	1.23915e-05
tr|A0A318TEE2|A0A318TEE2_9BRAD	1	2Fe-2S ferredoxin OS=Rhodopseudomonas faecalis OX=99655 GN=BJ122_12021 PE=3 SV=1	2.65844	0.00125975
tr|Q7MRG5|Q7MRG5_WOLSU	1	2Fe-2S ferredoxin-type domain-containing protein OS=Wolinella succinogenes (strain ATCC 29543 / DSM 1740 / LMG 7466 / NCTC 11488 / FDC 602W) OX=273121 GN=WS1382 PE=4 SV=1	0.496502	0.0125088
tr|A0A318TKK7|A0A318TKK7_9BRAD	6	2-methylcitrate dehydratase OS=Rhodopseudomonas faecalis OX=99655 GN=BJ122_101150 PE=3 SV=1	1.54126	0.0484621
tr|A0A1H8UFK0|A0A1H8UFK0_9BRAD	1	2-methylcitrate dehydratase OS=Rhodopseudomonas pseudopalustris OX=1513892 GN=SAMN05444123_10714 PE=3 SV=1	3.01013	0.000577441
tr|A0A318TI19|A0A318TI19_9BRAD	2	2-oxoglutarate ferredoxin oxidoreductase alpha subunit OS=Rhodopseudomonas faecalis OX=99655 GN=BJ122_10329 PE=4 SV=1	2.14434	0.000494248
tr|A0A679IML6|A0A679IML6_9ENTE	1	2-oxoglutarate reductase OS=Enterococcus saigonensis OX=1805431 GN=EsVE80_05370 PE=3 SV=1	0.14379	0.000918558
tr|A0A3D1U597|A0A3D1U597_9DELT	2	30S ribosomal protein S1 OS=Desulfovibrio sp. OX=885 GN=DEV75_03170 PE=4 SV=1	0.635353	0.0108303
tr|I6SFZ9|I6SFZ9_ENTHA	1	30S ribosomal protein S1 OS=Enterococcus hirae (strain ATCC 9790 / DSM 20160 / JCM 8729 / LMG 6399 / NBRC 3181 / NCIMB 6459 / NCDO 1258) OX=768486 GN=rpsA PE=4 SV=1	0.421462	0.0263267
tr|A0A7H0Y1I7|A0A7H0Y1I7_RHOCA	6	30S ribosomal protein S1 OS=Rhodobacter capsulatus OX=1061 GN=rpsA PE=3 SV=1	2.83376	0.00057507
tr|Q9X4E1|Q9X4E1_RHOSH	2	30S ribosomal protein S1 OS=Rhodobacter sphaeroides OX=1063 GN=rpsA1 PE=3 SV=1	3.83451	6.48393e-05
tr|A0A318TBK3|A0A318TBK3_9BRAD	4	30S ribosomal protein S1 OS=Rhodopseudomonas faecalis OX=99655 GN=BJ122_11230 PE=3 SV=1	2.58511	4.40617e-05
tr|B3Q600|B3Q600_RHOPT	1	30S ribosomal protein S1 OS=Rhodopseudomonas palustris (strain TIE-1) OX=395960 GN=Rpal_0067 PE=3 SV=1	1.91762	0.0126145
tr|Q7M8Y5|Q7M8Y5_WOLSU	10	30S RIBOSOMAL PROTEIN S1 OS=Wolinella succinogenes (strain ATCC 29543 / DSM 1740 / LMG 7466 / NCTC 11488 / FDC 602W) OX=273121 GN=RPSA PE=4 SV=1	0.309528	1.89721e-05
tr|S4FEN1|S4FEN1_ENTFC	2	30S ribosomal protein S10 OS=Enterococcus faecium SD3B-2 OX=1244155 GN=rpsJ PE=3 SV=1	0.218946	0.00796179
tr|E6VBV5|E6VBV5_RHOPX	1	30S ribosomal protein S10 OS=Rhodopseudomonas palustris (strain DX-1) OX=652103 GN=rpsJ PE=3 SV=1	2.8549	2.25526e-05
tr|G2H2U6|G2H2U6_9DELT	1	30S ribosomal protein S11 OS=Desulfovibrio sp. A2 OX=298701 GN=rpsK PE=3 SV=1	0.530716	0.020328
tr|A0A318T8Y8|A0A318T8Y8_9BRAD	3	30S ribosomal protein S11 OS=Rhodopseudomonas faecalis OX=99655 GN=rpsK PE=3 SV=1	3.44951	4.75623e-06
tr|E6VBV1|E6VBV1_RHOPX	2	30S ribosomal protein S12 OS=Rhodopseudomonas palustris (strain DX-1) OX=652103 GN=rpsL PE=3 SV=1	4.17969	3.31081e-07
sp|Q7MA55|RS12_WOLSU	1	30S ribosomal protein S12 OS=Wolinella succinogenes (strain ATCC 29543 / DSM 1740 / LMG 7466 / NCTC 11488 / FDC 602W) OX=273121 GN=rpsL PE=3 SV=1	0.313331	0.0208133
tr|S0L387|S0L387_ENTAV	1	30S ribosomal protein S13 OS=Enterococcus avium ATCC 14025 OX=1140002 GN=rpsM PE=3 SV=1	0.439001	0.0419267
tr|A0A0N8VEY8|A0A0N8VEY8_RHOCA	1	30S ribosomal protein S13 OS=Rhodobacter capsulatus OX=1061 GN=rpsM PE=3 SV=1	4.94475	0.00105781
tr|A0A330HGX1|A0A330HGX1_9RHOB	2	30S ribosomal protein S13 OS=Rhodobacter johrii OX=445629 GN=rpsM PE=3 SV=1	2.01348	0.0115554
tr|A0A318TAH9|A0A318TAH9_9BRAD	2	30S ribosomal protein S13 OS=Rhodopseudomonas faecalis OX=99655 GN=rpsM PE=3 SV=1	2.70149	9.86805e-05
tr|A0A318TCE2|A0A318TCE2_9BRAD	1	30S ribosomal protein S15 OS=Rhodopseudomonas faecalis OX=99655 GN=rpsO PE=3 SV=1	5.36437	0.00020077
tr|D5AM62|D5AM62_RHOCB	1	30S ribosomal protein S16 OS=Rhodobacter capsulatus (strain ATCC BAA-309 / NBRC 16581 / SB1003) OX=272942 GN=rpsP PE=3 SV=1	4.43708	0.00454918
tr|A0A318TAJ2|A0A318TAJ2_9BRAD	2	30S ribosomal protein S16 OS=Rhodopseudomonas faecalis OX=99655 GN=rpsP PE=3 SV=1	1.56461	0.0225389
tr|A0A1L8RDN2|A0A1L8RDN2_9ENTE	1	30S ribosomal protein S17 OS=Enterococcus canis OX=214095 GN=rpsQ PE=3 SV=1	0.295471	0.000925376
tr|A0A318TAD8|A0A318TAD8_9BRAD	1	30S ribosomal protein S17 OS=Rhodopseudomonas faecalis OX=99655 GN=rpsQ PE=3 SV=1	2.68242	2.45029e-06
sp|Q7MQZ9|RS18_WOLSU	1	30S ribosomal protein S18 OS=Wolinella succinogenes (strain ATCC 29543 / DSM 1740 / LMG 7466 / NCTC 11488 / FDC 602W) OX=273121 GN=rpsR PE=3 SV=1	0.448145	0.0281191
tr|V7EJ15|V7EJ15_9RHOB	1	30S ribosomal protein S19 OS=Rhodobacter sp. CACIA14H1 OX=1408890 GN=rpsS PE=3 SV=1	1.79493	0.0246379
tr|A0A3G6WJN8|A0A3G6WJN8_RHOSH	1	30S ribosomal protein S19 OS=Rhodobacter sphaeroides OX=1063 GN=rpsS PE=3 SV=1	1.79493	0.0246379
tr|A0A318T9A5|A0A318T9A5_9BRAD	1	30S ribosomal protein S19 OS=Rhodopseudomonas faecalis OX=99655 GN=rpsS PE=3 SV=1	3.29199	2.57625e-05
tr|E6VBW0|E6VBW0_RHOPX	1	30S ribosomal protein S19 OS=Rhodopseudomonas palustris (strain DX-1) OX=652103 GN=rpsS PE=3 SV=1	1.9735	0.02723
tr|A0A239CJ44|A0A239CJ44_9RHOB	2	30S ribosomal protein S2 OS=Rhodobacter megalophilus OX=418630 GN=rpsB PE=3 SV=1	4.3375	0.000938849
tr|A0A318U0M4|A0A318U0M4_9BRAD	5	30S ribosomal protein S2 OS=Rhodopseudomonas faecalis OX=99655 GN=rpsB PE=3 SV=1	3.39681	3.88172e-07
sp|Q7MAK0|RS2_WOLSU	5	30S ribosomal protein S2 OS=Wolinella succinogenes (strain ATCC 29543 / DSM 1740 / LMG 7466 / NCTC 11488 / FDC 602W) OX=273121 GN=rpsB PE=3 SV=1	0.698909	0.0199769
tr|D5ATE7|D5ATE7_RHOCB	1	30S ribosomal protein S20 OS=Rhodobacter capsulatus (strain ATCC BAA-309 / NBRC 16581 / SB1003) OX=272942 GN=rpsT PE=3 SV=1	2.89339	0.00200268
tr|A0A318TN51|A0A318TN51_9BRAD	2	30S ribosomal protein S20 OS=Rhodopseudomonas faecalis OX=99655 GN=rpsT PE=3 SV=1	3.53906	0.000142861
tr|A0A0N1C4N5|A0A0N1C4N5_9BRAD	1	30S ribosomal protein S21 OS=Rhodopseudomonas sp. AAP120 OX=1523430 GN=rpsU PE=3 SV=1	2.48553	0.0002842
tr|S0K1G2|S0K1G2_9ENTE	1	30S ribosomal protein S3 OS=Enterococcus dispar ATCC 51266 OX=1139219 GN=rpsC PE=3 SV=1	0.250052	0.00485523
tr|S0JAM7|S0JAM7_9ENTE	1	30S ribosomal protein S3 OS=Enterococcus saccharolyticus subsp. saccharolyticus ATCC 43076 OX=1139996 GN=rpsC PE=3 SV=1	0.346976	0.0124881
tr|D5AM00|D5AM00_RHOCB	2	30S ribosomal protein S3 OS=Rhodobacter capsulatus (strain ATCC BAA-309 / NBRC 16581 / SB1003) OX=272942 GN=rpsC PE=3 SV=1	1.93796	0.0133416
tr|A0A330HDJ2|A0A330HDJ2_9RHOB	1	30S ribosomal protein S3 OS=Rhodobacter johrii OX=445629 GN=rpsC PE=3 SV=1	7.11791	0.000371774
tr|A0A318TPS2|A0A318TPS2_9BRAD	2	30S ribosomal protein S3 OS=Rhodopseudomonas faecalis OX=99655 GN=rpsC PE=3 SV=1	2.00521	0.00488977
sp|Q7M8E0|RS3_WOLSU	3	30S ribosomal protein S3 OS=Wolinella succinogenes (strain ATCC 29543 / DSM 1740 / LMG 7466 / NCTC 11488 / FDC 602W) OX=273121 GN=rpsC PE=3 SV=1	0.232372	0.000412763
tr|A0A4Q0MWI8|A0A4Q0MWI8_9DELT	1	30S ribosomal protein S4 OS=Desulfovibrio sp. DS-1 OX=2497683 GN=rpsD PE=3 SV=1	1.55129	0.0315035
tr|A0A0Q0WBR2|A0A0Q0WBR2_RHOCA	2	30S ribosomal protein S4 OS=Rhodobacter capsulatus OX=1061 GN=rpsD PE=3 SV=1	4.02664	0.00421976
tr|A0A330HLX9|A0A330HLX9_9RHOB	1	30S ribosomal protein S4 OS=Rhodobacter johrii OX=445629 GN=rpsD PE=3 SV=1	4.51738	6.73647e-05				oxidoreductase activity, acting on metal ions
tr|A0A318TLN4|A0A318TLN4_9BRAD	2	30S ribosomal protein S4 OS=Rhodopseudomonas faecalis OX=99655 GN=rpsD PE=3 SV=1	2.03703	0.00145491
tr|A0A519G145|A0A519G145_9BURK	1	30S ribosomal protein S4 OS=Rubrivivax sp. OX=50259 GN=rpsD PE=3 SV=1	0.57563	0.0498748
sp|Q7M8F6|RS4_WOLSU	6	30S ribosomal protein S4 OS=Wolinella succinogenes (strain ATCC 29543 / DSM 1740 / LMG 7466 / NCTC 11488 / FDC 602W) OX=273121 GN=rpsD PE=3 SV=1	0.381015	0.00102145
tr|A0A3G6WJH9|A0A3G6WJH9_RHOSH	3	30S ribosomal protein S5 OS=Rhodobacter sphaeroides OX=1063 GN=rpsE PE=3 SV=1	2.29604	0.0123218
tr|G2H722|G2H722_9DELT	1	30S ribosomal protein S6 OS=Desulfovibrio sp. A2 OX=298701 GN=rpsF PE=3 SV=1	0.457174	0.00281221
tr|A0A0Q0QM60|A0A0Q0QM60_RHOCA	1	30S ribosomal protein S6 OS=Rhodobacter capsulatus OX=1061 GN=rpsF PE=3 SV=1	5.94078	0.00415193
tr|A0A318THV6|A0A318THV6_9BRAD	5	30S ribosomal protein S6 OS=Rhodopseudomonas faecalis OX=99655 GN=rpsF PE=3 SV=1	2.94133	1.22508e-05
sp|Q7MQZ8|RS6_WOLSU	4	30S ribosomal protein S6 OS=Wolinella succinogenes (strain ATCC 29543 / DSM 1740 / LMG 7466 / NCTC 11488 / FDC 602W) OX=273121 GN=rpsF PE=3 SV=1	0.280884	0.00476022
tr|A0A318TCT3|A0A318TCT3_9BRAD	2	30S ribosomal protein S7 OS=Rhodopseudomonas faecalis OX=99655 GN=rpsG PE=3 SV=1	3.33577	2.80013e-06
tr|A0A330H4P3|A0A330H4P3_9RHOB	3	30S ribosomal protein S9 OS=Rhodobacter johrii OX=445629 GN=rpsI PE=3 SV=1	3.88343	7.40408e-05
tr|A0A318TL74|A0A318TL74_9BRAD	4	30S ribosomal protein S9 OS=Rhodopseudomonas faecalis OX=99655 GN=rpsI PE=3 SV=1	2.33206	0.000233289
sp|Q7M7R1|RS9_WOLSU	2	30S ribosomal protein S9 OS=Wolinella succinogenes (strain ATCC 29543 / DSM 1740 / LMG 7466 / NCTC 11488 / FDC 602W) OX=273121 GN=rpsI PE=3 SV=1	0.420134	0.00722908
tr|A0A7H0XVB3|A0A7H0XVB3_RHOCA	1	3-hydroxy-5-phosphonooxypentane-2,4-dione thiolase OS=Rhodobacter capsulatus OX=1061 GN=lsrF PE=4 SV=1	2.53474	0.0247652
sp|Q7MAS2|FABZ_WOLSU	1	3-hydroxyacyl-[acyl-carrier-protein] dehydratase FabZ OS=Wolinella succinogenes (strain ATCC 29543 / DSM 1740 / LMG 7466 / NCTC 11488 / FDC 602W) OX=273121 GN=fabZ PE=3 SV=1	0.256695	0.00297562
tr|A0A318TE73|A0A318TE73_9BRAD	1	3-isopropylmalate dehydratase small subunit OS=Rhodopseudomonas faecalis OX=99655 GN=leuD PE=3 SV=1	1.90666	0.00666193
tr|A0A318TBA6|A0A318TBA6_9BRAD	2	3-isopropylmalate dehydrogenase OS=Rhodopseudomonas faecalis OX=99655 GN=leuB PE=3 SV=1	1.46904	0.046828
tr|A0A318TNQ3|A0A318TNQ3_9BRAD	1	3-methylcrotonyl-CoA carboxylase beta subunit OS=Rhodopseudomonas faecalis OX=99655 GN=BJ122_1064 PE=4 SV=1	2.78628	3.48442e-05
tr|A0A318TD63|A0A318TD63_9BRAD	2	3-oxoacid CoA-transferase subunit A OS=Rhodopseudomonas faecalis OX=99655 GN=BJ122_11166 PE=4 SV=1	1.61296	0.0125955
tr|A0A318T932|A0A318T932_9BRAD	1	3-oxoacyl-[acyl-carrier protein] reductase OS=Rhodopseudomonas faecalis OX=99655 GN=BJ122_12527 PE=4 SV=1	4.96711	7.48539e-05
tr|A0A318TA66|A0A318TA66_9BRAD	3	3-oxoacyl-[acyl-carrier-protein] reductase /acetoacetyl-CoA reductase OS=Rhodopseudomonas faecalis OX=99655 GN=BJ122_12153 PE=3 SV=1	2.98324	2.0308e-05
tr|Q7M9W0|Q7M9W0_WOLSU	2	3-oxoacyl-[acyl-carrier-protein] reductase OS=Wolinella succinogenes (strain ATCC 29543 / DSM 1740 / LMG 7466 / NCTC 11488 / FDC 602W) OX=273121 GN=FABG PE=3 SV=1	0.758348	0.0231134
tr|A0A318T9K1|A0A318T9K1_9BRAD	2	3-oxoacyl-[acyl-carrier-protein] synthase I OS=Rhodopseudomonas faecalis OX=99655 GN=BJ122_12436 PE=3 SV=1	2.58681	0.000579762
tr|A0A318TML2|A0A318TML2_9BRAD	1	3-oxoacyl-[acyl-carrier-protein] synthase II OS=Rhodopseudomonas faecalis OX=99655 GN=BJ122_102326 PE=3 SV=1	1.74199	0.0251125
tr|B8DN84|B8DN84_DESVM	1	4Fe-4S ferredoxin iron-sulfur binding domain protein OS=Desulfovibrio vulgaris (strain Miyazaki F / DSM 19637) OX=883 GN=DvMF_0067 PE=4 SV=1	0.595364	0.0243265
tr|A0A318TJU8|A0A318TJU8_9BRAD	1	4-hydroxy-tetrahydrodipicolinate reductase OS=Rhodopseudomonas faecalis OX=99655 GN=dapB PE=3 SV=1	1.9149	0.00253651
sp|Q7M7L6|DAPA_WOLSU	3	4-hydroxy-tetrahydrodipicolinate synthase OS=Wolinella succinogenes (strain ATCC 29543 / DSM 1740 / LMG 7466 / NCTC 11488 / FDC 602W) OX=273121 GN=dapA PE=3 SV=1	0.568634	0.000493425
tr|A0A521IV92|A0A521IV92_9FIRM	1	50S ribosomal protein L1 OS=Firmicutes bacterium OX=1879010 GN=rplA PE=3 SV=1	0.279337	0.00177489
tr|A0A3G6WK13|A0A3G6WK13_RHOSH	3	50S ribosomal protein L1 OS=Rhodobacter sphaeroides OX=1063 GN=rplA PE=3 SV=1	1.79199	0.018393
tr|A0A318TPU3|A0A318TPU3_9BRAD	3	50S ribosomal protein L1 OS=Rhodopseudomonas faecalis OX=99655 GN=rplA PE=3 SV=1	1.56007	0.00307741
sp|Q7MA59|RL1_WOLSU	4	50S ribosomal protein L1 OS=Wolinella succinogenes (strain ATCC 29543 / DSM 1740 / LMG 7466 / NCTC 11488 / FDC 602W) OX=273121 GN=rplA PE=3 SV=1	0.402268	0.000587178
tr|D5ALY4|D5ALY4_RHOCB	1	50S ribosomal protein L10 OS=Rhodobacter capsulatus (strain ATCC BAA-309 / NBRC 16581 / SB1003) OX=272942 GN=rplJ PE=3 SV=1	2.08086	0.0422003
tr|A0A318TEP0|A0A318TEP0_9BRAD	2	50S ribosomal protein L10 OS=Rhodopseudomonas faecalis OX=99655 GN=rplJ PE=3 SV=1	3.21066	2.51715e-06
tr|G2H7E2|G2H7E2_9DELT	1	50S ribosomal protein L11 OS=Desulfovibrio sp. A2 OX=298701 GN=rplK PE=3 SV=1	1.69272	0.0261045
tr|A0A318TCU3|A0A318TCU3_9BRAD	1	50S ribosomal protein L11 OS=Rhodopseudomonas faecalis OX=99655 GN=rplK PE=3 SV=1	2.20818	0.000286753
tr|A0A679IS28|A0A679IS28_9ENTE	1	50S ribosomal protein L13 OS=Enterococcus saigonensis OX=1805431 GN=rplM PE=3 SV=1	0.245682	9.48016e-05
tr|D5AQ41|D5AQ41_RHOCB	2	50S ribosomal protein L13 OS=Rhodobacter capsulatus (strain ATCC BAA-309 / NBRC 16581 / SB1003) OX=272942 GN=rplM PE=3 SV=1	2.8744	0.0283953
tr|A0A318TJ08|A0A318TJ08_9BRAD	2	50S ribosomal protein L13 OS=Rhodopseudomonas faecalis OX=99655 GN=rplM PE=3 SV=1	3.446	9.41963e-08
sp|Q7M7R0|RL13_WOLSU	1	50S ribosomal protein L13 OS=Wolinella succinogenes (strain ATCC 29543 / DSM 1740 / LMG 7466 / NCTC 11488 / FDC 602W) OX=273121 GN=rplM PE=3 SV=1	0.216526	1.08935e-06
tr|D5AM05|D5AM05_RHOCB	1	50S ribosomal protein L14 OS=Rhodobacter capsulatus (strain ATCC BAA-309 / NBRC 16581 / SB1003) OX=272942 GN=rplN PE=3 SV=1	14.8959	0.000508562
tr|A0A318TIH5|A0A318TIH5_9BRAD	1	50S ribosomal protein L14 OS=Rhodopseudomonas faecalis OX=99655 GN=rplN PE=3 SV=1	5.81056	5.43255e-07
tr|A0A7H0XXK9|A0A7H0XXK9_RHOCA	2	50S ribosomal protein L15 OS=Rhodobacter capsulatus OX=1061 GN=rplO PE=3 SV=1	6.82002	0.0108454
tr|A0A330HJH5|A0A330HJH5_9RHOB	3	50S ribosomal protein L15 OS=Rhodobacter johrii OX=445629 GN=rplO PE=3 SV=1	2.58967	0.00354432
tr|A0A318TAC7|A0A318TAC7_9BRAD	5	50S ribosomal protein L15 OS=Rhodopseudomonas faecalis OX=99655 GN=rplO PE=3 SV=1	3.07117	1.2193e-07
tr|A0A0Q0V973|A0A0Q0V973_RHOCA	2	50S ribosomal protein L16 OS=Rhodobacter capsulatus OX=1061 GN=rplP PE=3 SV=1	2.22919	0.00786527
tr|A0A3G6WJH0|A0A3G6WJH0_RHOSH	1	50S ribosomal protein L16 OS=Rhodobacter sphaeroides OX=1063 GN=rplP PE=3 SV=1	0.475974	0.0430094
tr|A0A318TEL7|A0A318TEL7_9BRAD	3	50S ribosomal protein L16 OS=Rhodopseudomonas faecalis OX=99655 GN=rplP PE=3 SV=1	2.84484	0.00141634
sp|Q7M8E1|RL16_WOLSU	1	50S ribosomal protein L16 OS=Wolinella succinogenes (strain ATCC 29543 / DSM 1740 / LMG 7466 / NCTC 11488 / FDC 602W) OX=273121 GN=rplP PE=3 SV=1	0.377243	0.00814166
tr|G2H2U9|G2H2U9_9DELT	1	50S ribosomal protein L17 OS=Desulfovibrio sp. A2 OX=298701 GN=rplQ PE=3 SV=1	0.354866	0.0182773
tr|A0A318TCQ3|A0A318TCQ3_9BRAD	2	50S ribosomal protein L17 OS=Rhodopseudomonas faecalis OX=99655 GN=rplQ PE=3 SV=1	4.24417	4.33174e-05
sp|Q07KP3|RL17_RHOP5	1	50S ribosomal protein L17 OS=Rhodopseudomonas palustris (strain BisA53) OX=316055 GN=rplQ PE=3 SV=1	2.99199	4.58507e-07
sp|Q7M8F8|RL17_WOLSU	2	50S ribosomal protein L17 OS=Wolinella succinogenes (strain ATCC 29543 / DSM 1740 / LMG 7466 / NCTC 11488 / FDC 602W) OX=273121 GN=rplQ PE=3 SV=1	0.404395	0.0200083
tr|X5NWZ1|X5NWZ1_ENTFL	1	50S ribosomal protein L18 OS=Enterococcus faecalis CBRD01 OX=1400521 GN=rplR PE=3 SV=1	1.76266	0.0244741
tr|A0A318TPR3|A0A318TPR3_9BRAD	2	50S ribosomal protein L18 OS=Rhodopseudomonas faecalis OX=99655 GN=rplR PE=3 SV=1	2.3686	1.07692e-05
tr|A0A318TJT9|A0A318TJT9_9BRAD	1	50S ribosomal protein L19 OS=Rhodopseudomonas faecalis OX=99655 GN=rplS PE=3 SV=1	1.84318	0.000135174
tr|E6VJ05|E6VJ05_RHOPX	2	50S ribosomal protein L19 OS=Rhodopseudomonas palustris (strain DX-1) OX=652103 GN=rplS PE=3 SV=1	2.08319	0.00445457
tr|A0A413AQT4|A0A413AQT4_9ENTE	1	50S ribosomal protein L2 OS=Enterococcus asini OX=57732 GN=rplB PE=3 SV=1	0.203068	0.00135749
tr|A0A330HDR3|A0A330HDR3_9RHOB	3	50S ribosomal protein L2 OS=Rhodobacter johrii OX=445629 GN=rplB PE=3 SV=1	1.55996	0.0404355
tr|A0A318U3C7|A0A318U3C7_9RHOB	2	50S ribosomal protein L2 OS=Rhodobacter viridis OX=1054202 GN=rplB PE=3 SV=1	5.94766	0.000361664
tr|A0A318T909|A0A318T909_9BRAD	3	50S ribosomal protein L2 OS=Rhodopseudomonas faecalis OX=99655 GN=rplB PE=3 SV=1	2.96005	6.19039e-06
tr|A0A318TR50|A0A318TR50_9BRAD	3	50S ribosomal protein L20 OS=Rhodopseudomonas faecalis OX=99655 GN=rplT PE=3 SV=1	2.14284	0.0014283
tr|E6VF13|E6VF13_RHOPX	3	50S ribosomal protein L20 OS=Rhodopseudomonas palustris (strain DX-1) OX=652103 GN=rplT PE=3 SV=1	1.89366	0.0144231
sp|Q7M9L7|RL20_WOLSU	1	50S ribosomal protein L20 OS=Wolinella succinogenes (strain ATCC 29543 / DSM 1740 / LMG 7466 / NCTC 11488 / FDC 602W) OX=273121 GN=rplT PE=3 SV=1	0.328078	0.0128722
tr|G2H757|G2H757_9DELT	1	50S ribosomal protein L21 OS=Desulfovibrio sp. A2 OX=298701 GN=rplU PE=3 SV=1	1.71124	0.0466235
tr|A0A318T9L8|A0A318T9L8_9BRAD	3	50S ribosomal protein L21 OS=Rhodopseudomonas faecalis OX=99655 GN=rplU PE=3 SV=1	2.35924	2.17779e-06
sp|Q7MA30|RL21_WOLSU	3	50S ribosomal protein L21 OS=Wolinella succinogenes (strain ATCC 29543 / DSM 1740 / LMG 7466 / NCTC 11488 / FDC 602W) OX=273121 GN=rplU PE=3 SV=1	0.463388	0.00499364
tr|S0NPN7|S0NPN7_9ENTE	1	50S ribosomal protein L22 OS=Enterococcus saccharolyticus subsp. saccharolyticus ATCC 43076 OX=1139996 GN=rplV PE=3 SV=1	0.373504	0.0374417
tr|A0A318TCS1|A0A318TCS1_9BRAD	1	50S ribosomal protein L22 OS=Rhodopseudomonas faecalis OX=99655 GN=rplV PE=3 SV=1	4.42075	3.92773e-05
tr|A0A4V5PNY6|A0A4V5PNY6_RHOCA	1	50S ribosomal protein L23 OS=Rhodobacter capsulatus OX=1061 GN=rplW PE=3 SV=1	0.234384	0.00395371
tr|A0A3G6WJI4|A0A3G6WJI4_RHOSH	2	50S ribosomal protein L23 OS=Rhodobacter sphaeroides OX=1063 GN=rplW PE=3 SV=1	0.658506	0.031631
tr|A0A318TAK3|A0A318TAK3_9BRAD	1	50S ribosomal protein L23 OS=Rhodopseudomonas faecalis OX=99655 GN=rplW PE=3 SV=1	1.95932	0.00249446
sp|Q7M8D6|RL23_WOLSU	1	50S ribosomal protein L23 OS=Wolinella succinogenes (strain ATCC 29543 / DSM 1740 / LMG 7466 / NCTC 11488 / FDC 602W) OX=273121 GN=rplW PE=3 SV=1	0.227264	0.00860144
tr|A0A318TA80|A0A318TA80_9BRAD	3	50S ribosomal protein L24 OS=Rhodopseudomonas faecalis OX=99655 GN=rplX PE=3 SV=1	3.08288	1.52071e-05
sp|Q7M8E4|RL24_WOLSU	2	50S ribosomal protein L24 OS=Wolinella succinogenes (strain ATCC 29543 / DSM 1740 / LMG 7466 / NCTC 11488 / FDC 602W) OX=273121 GN=rplX PE=3 SV=2	0.423811	0.00378279
tr|A0A330HI07|A0A330HI07_9RHOB	1	50S ribosomal protein L25 OS=Rhodobacter johrii OX=445629 GN=rplY PE=3 SV=1	1.77923	0.0142205
tr|A0A318TCP8|A0A318TCP8_9BRAD	8	50S ribosomal protein L25 OS=Rhodopseudomonas faecalis OX=99655 GN=rplY PE=3 SV=1	3.04132	1.17774e-06
tr|E6VQL6|E6VQL6_RHOPX	2	50S ribosomal protein L25 OS=Rhodopseudomonas palustris (strain DX-1) OX=652103 GN=rplY PE=3 SV=1	5.94713	0.000206939
sp|Q7M7U7|RL25_WOLSU	5	50S ribosomal protein L25 OS=Wolinella succinogenes (strain ATCC 29543 / DSM 1740 / LMG 7466 / NCTC 11488 / FDC 602W) OX=273121 GN=rplY PE=3 SV=1	0.594608	0.00054162
tr|A0A318THV9|A0A318THV9_9BRAD	3	50S ribosomal protein L27 OS=Rhodopseudomonas faecalis OX=99655 GN=rpmA PE=3 SV=1	2.30707	0.00011368
tr|A0A318T941|A0A318T941_9BRAD	3	50S ribosomal protein L28 OS=Rhodopseudomonas faecalis OX=99655 GN=rpmB PE=3 SV=1	2.68785	0.000244947
tr|A0A318TCT5|A0A318TCT5_9BRAD	2	50S ribosomal protein L29 OS=Rhodopseudomonas faecalis OX=99655 GN=rpmC PE=3 SV=1	1.85966	0.0472694
tr|E6VBW4|E6VBW4_RHOPX	1	50S ribosomal protein L29 OS=Rhodopseudomonas palustris (strain DX-1) OX=652103 GN=rpmC PE=3 SV=1	2.78435	0.0401334
tr|A0A0N8VEZ1|A0A0N8VEZ1_RHOCA	2	50S ribosomal protein L3 OS=Rhodobacter capsulatus OX=1061 GN=rplC PE=3 SV=1	9.72728	0.0100791
tr|B9KL91|B9KL91_RHOSK	1	50S ribosomal protein L3 OS=Rhodobacter sphaeroides (strain KD131 / KCTC 12085) OX=557760 GN=rplC PE=3 SV=1	2.31301	0.0178538
tr|A0A318TII5|A0A318TII5_9BRAD	2	50S ribosomal protein L3 OS=Rhodopseudomonas faecalis OX=99655 GN=rplC PE=3 SV=1	3.88253	7.88502e-07
sp|Q7M8D4|RL3_WOLSU	1	50S ribosomal protein L3 OS=Wolinella succinogenes (strain ATCC 29543 / DSM 1740 / LMG 7466 / NCTC 11488 / FDC 602W) OX=273121 GN=rplC PE=3 SV=1	0.197478	0.00180107
tr|A0A318TIS1|A0A318TIS1_9BRAD	2	50S ribosomal protein L31 OS=Rhodopseudomonas faecalis OX=99655 GN=rpmE PE=3 SV=1	2.09515	0.0225384
tr|T0VJ73|T0VJ73_9ENTE	1	50S ribosomal protein L31 type B OS=Enterococcus sp. HSIEG1 OX=1316414 GN=rpmE2 PE=3 SV=1	0.211233	0.0163108
tr|E6VCT4|E6VCT4_RHOPX	1	50S ribosomal protein L33 OS=Rhodopseudomonas palustris (strain DX-1) OX=652103 GN=rpmG PE=3 SV=1	3.64191	0.00330147
tr|A0A4Q0MW69|A0A4Q0MW69_9DELT	1	50S ribosomal protein L4 OS=Desulfovibrio sp. DS-1 OX=2497683 GN=rplD PE=3 SV=1	1.81146	0.00423792
tr|A0A3G6WJG5|A0A3G6WJG5_RHOSH	2	50S ribosomal protein L4 OS=Rhodobacter sphaeroides OX=1063 GN=rplD PE=3 SV=1	3.61863	0.000197473
tr|E6VBV7|E6VBV7_RHOPX	1	50S ribosomal protein L4 OS=Rhodopseudomonas palustris (strain DX-1) OX=652103 GN=rplD PE=3 SV=1	4.27582	0.0137393
sp|Q7M8D5|RL4_WOLSU	1	50S ribosomal protein L4 OS=Wolinella succinogenes (strain ATCC 29543 / DSM 1740 / LMG 7466 / NCTC 11488 / FDC 602W) OX=273121 GN=rplD PE=3 SV=1	0.446166	0.0152595
tr|G2H2T4|G2H2T4_9DELT	1	50S ribosomal protein L5 OS=Desulfovibrio sp. A2 OX=298701 GN=rplE PE=3 SV=1	0.492439	0.0150986
tr|A0A3G6WJI7|A0A3G6WJI7_RHOSH	2	50S ribosomal protein L5 OS=Rhodobacter sphaeroides OX=1063 GN=rplE PE=3 SV=1	1.82019	0.0184833
tr|A0A318TAJ1|A0A318TAJ1_9BRAD	2	50S ribosomal protein L5 OS=Rhodopseudomonas faecalis OX=99655 GN=rplE PE=3 SV=1	3.42178	5.78277e-07
tr|A0A0D7EMC4|A0A0D7EMC4_RHOPL	2	50S ribosomal protein L5 OS=Rhodopseudomonas palustris OX=1076 GN=rplE PE=3 SV=1	0.342406	0.0328879
tr|A0A4Q0MWI0|A0A4Q0MWI0_9DELT	2	50S ribosomal protein L6 OS=Desulfovibrio sp. DS-1 OX=2497683 GN=rplF PE=3 SV=1	0.430738	0.00474433
tr|A0A1G7FVM3|A0A1G7FVM3_RHOCA	2	50S ribosomal protein L6 OS=Rhodobacter capsulatus OX=1061 GN=rplF PE=3 SV=1	0.313398	0.000211244
tr|A0A318TCR3|A0A318TCR3_9BRAD	3	50S ribosomal protein L6 OS=Rhodopseudomonas faecalis OX=99655 GN=rplF PE=3 SV=1	2.83317	2.86147e-05
sp|Q7M8E7|RL6_WOLSU	3	50S ribosomal protein L6 OS=Wolinella succinogenes (strain ATCC 29543 / DSM 1740 / LMG 7466 / NCTC 11488 / FDC 602W) OX=273121 GN=rplF PE=3 SV=1	0.507026	0.007104
tr|S0RG40|S0RG40_ENTAV	4	50S ribosomal protein L7/L12 OS=Enterococcus avium ATCC 14025 OX=1140002 GN=rplL PE=3 SV=1	0.265691	0.0198168
tr|A0A174TP49|A0A174TP49_9BACT	1	50S ribosomal protein L7/L12 OS=Parabacteroides distasonis OX=823 GN=rplL PE=3 SV=1	0.395341	0.0324711
sp|Q7MA57|RL7_WOLSU	2	50S ribosomal protein L7/L12 OS=Wolinella succinogenes (strain ATCC 29543 / DSM 1740 / LMG 7466 / NCTC 11488 / FDC 602W) OX=273121 GN=rplL PE=3 SV=1	0.448779	0.0311242
tr|A0A330HBG0|A0A330HBG0_9RHOB	5	50S ribosomal protein L9 OS=Rhodobacter johrii OX=445629 GN=rplI PE=3 SV=1	2.85894	0.000304313
tr|A0A318THJ9|A0A318THJ9_9BRAD	4	50S ribosomal protein L9 OS=Rhodopseudomonas faecalis OX=99655 GN=rplI PE=3 SV=1	2.473	3.23087e-05
sp|Q7M8Z5|RL9_WOLSU	2	50S ribosomal protein L9 OS=Wolinella succinogenes (strain ATCC 29543 / DSM 1740 / LMG 7466 / NCTC 11488 / FDC 602W) OX=273121 GN=rplI PE=3 SV=1	1.3949	0.00728213
tr|A0A318TU72|A0A318TU72_9BRAD	20	5-methyltetrahydropteroyltriglutamate--homocysteine methyltransferase OS=Rhodopseudomonas faecalis OX=99655 GN=metE PE=3 SV=1	2.82849	0.000137973
tr|A0A318TVV1|A0A318TVV1_9BRAD	1	6,7-dimethyl-8-ribityllumazine synthase OS=Rhodopseudomonas faecalis OX=99655 GN=ribH PE=3 SV=1	3.4006	0.000602398
sp|Q7MAF0|RISB_WOLSU	2	6,7-dimethyl-8-ribityllumazine synthase OS=Wolinella succinogenes (strain ATCC 29543 / DSM 1740 / LMG 7466 / NCTC 11488 / FDC 602W) OX=273121 GN=ribH PE=3 SV=1	0.628139	0.00612536
tr|A0A4Y3TG22|A0A4Y3TG22_DESDE	1	60 kDa chaperonin OS=Desulfovibrio desulfuricans OX=876 GN=groL PE=3 SV=1	0.474971	0.0141206
tr|A0A6P1ZMB9|A0A6P1ZMB9_9DELT	1	60 kDa chaperonin OS=Desulfovibrio marinus OX=370038 GN=groL PE=3 SV=1	2.72572	0.00635107
tr|A0A388SM30|A0A388SM30_9DELT	4	60 kDa chaperonin OS=Desulfovibrio sp. HK-II OX=2009266 GN=groL PE=3 SV=1	0.395337	0.000118011
tr|A0A4U1JWS3|A0A4U1JWS3_RHOCA	3	60 kDa chaperonin OS=Rhodobacter capsulatus OX=1061 GN=groL PE=3 SV=1	3.80318	0.00428453
tr|B9KPK0|B9KPK0_RHOSK	6	60 kDa chaperonin OS=Rhodobacter sphaeroides (strain KD131 / KCTC 12085) OX=557760 GN=groL PE=3 SV=1	6.01798	0.00122834
tr|A0A2S6NP97|A0A2S6NP97_RHOGL	2	60 kDa chaperonin OS=Rhodopila globiformis OX=1071 GN=groL PE=3 SV=1	3.05953	0.000376267
tr|A0A318TIB1|A0A318TIB1_9BRAD	6	60 kDa chaperonin OS=Rhodopseudomonas faecalis OX=99655 GN=groL PE=3 SV=1	3.10081	7.17385e-06
tr|A0A318TQK2|A0A318TQK2_9BRAD	3	60 kDa chaperonin OS=Rhodopseudomonas faecalis OX=99655 GN=groL PE=3 SV=1	1.96848	0.0247797
tr|E6VFE5|E6VFE5_RHOPX	2	60 kDa chaperonin OS=Rhodopseudomonas palustris (strain DX-1) OX=652103 GN=groL PE=3 SV=1	2.9329	0.00107706
tr|A0A1H8VUG6|A0A1H8VUG6_9BRAD	1	60 kDa chaperonin OS=Rhodopseudomonas pseudopalustris OX=1513892 GN=groL PE=3 SV=1	2.41769	0.000657811
tr|A0A4R2NXL8|A0A4R2NXL8_RHOAD	1	60 kDa chaperonin OS=Rhodovulum adriaticum OX=35804 GN=groL PE=3 SV=1	7.1209	1.19228e-05
tr|F3LMI8|F3LMI8_9BURK	5	60 kDa chaperonin OS=Rubrivivax benzoatilyticus JA2 = ATCC BAA-35 OX=987059 GN=groL PE=3 SV=1	0.736672	0.0415176
sp|Q7MAE3|CH60_WOLSU	12	60 kDa chaperonin OS=Wolinella succinogenes (strain ATCC 29543 / DSM 1740 / LMG 7466 / NCTC 11488 / FDC 602W) OX=273121 GN=groL PE=3 SV=1	0.589049	0.00943303
tr|B9KQ15|B9KQ15_RHOSK	6	ABC branched chain amino acid family transporter, periplasmic substrate binding protein OS=Rhodobacter sphaeroides (strain KD131 / KCTC 12085) OX=557760 GN=RSKD131_2690 PE=4 SV=1	2.16121	0.0267415
tr|Q3J1M8|Q3J1M8_RHOS4	2	ABC D-methionine uptake transporter, substrate-binding protein OS=Rhodobacter sphaeroides (strain ATCC 17023 / 2.4.1 / NCIB 8253 / DSM 158) OX=272943 GN=metQ PE=3 SV=1	1.72222	0.0145882
tr|U7U3L8|U7U3L8_ENTFC	1	ABC transporter ATP-binding protein OS=Enterococcus faecium 10/96A OX=1391465 GN=O991_00988 PE=4 SV=1	0.276142	0.00313797
tr|A0A4U1JU30|A0A4U1JU30_RHOCA	1	ABC transporter substrate-binding protein OS=Rhodobacter capsulatus OX=1061 GN=FBT96_05155 PE=4 SV=1	4.2095	0.000159364
tr|A0A7H0Y0F8|A0A7H0Y0F8_RHOCA	3	ABC transporter substrate-binding protein OS=Rhodobacter capsulatus OX=1061 GN=H9N28_07010 PE=4 SV=1	8.8948	0.00679226
tr|A0A330HD31|A0A330HD31_9RHOB	1	ABC transporter substrate-binding protein OS=Rhodobacter johrii OX=445629 GN=DDV93_07820 PE=3 SV=1	0.100852	0.002197
tr|A0A330H561|A0A330H561_9RHOB	1	ABC transporter substrate-binding protein OS=Rhodobacter johrii OX=445629 GN=DDV93_15950 PE=4 SV=1	2.06406	0.0136419
tr|B9KL66|B9KL66_RHOSK	3	ABC transporter, substrate-binding protein OS=Rhodobacter sphaeroides (strain KD131 / KCTC 12085) OX=557760 GN=RSKD131_2003 PE=4 SV=1	2.72088	0.00145169
tr|D5ATJ8|D5ATJ8_RHOCB	1	Acetolactate synthase OS=Rhodobacter capsulatus (strain ATCC BAA-309 / NBRC 16581 / SB1003) OX=272942 GN=ilvH PE=3 SV=1	0.554368	0.0432464
tr|A0A318T9I4|A0A318T9I4_9BRAD	2	Acetolactate synthase OS=Rhodopseudomonas faecalis OX=99655 GN=BJ122_1232 PE=3 SV=1	2.03958	2.19434e-05
tr|A0A318TBZ1|A0A318TBZ1_9BRAD	6	Acetolactate synthase OS=Rhodopseudomonas faecalis OX=99655 GN=BJ122_1233 PE=3 SV=1	1.66191	0.000735592
tr|B9KLT9|B9KLT9_RHOSK	1	Acetyl-CoA acetyltransferase OS=Rhodobacter sphaeroides (strain KD131 / KCTC 12085) OX=557760 GN=RSKD131_2104 PE=3 SV=1	4.63715	0.00125729
tr|A0A318T8N2|A0A318T8N2_9BRAD	2	Acetyl-CoA acetyltransferase OS=Rhodopseudomonas faecalis OX=99655 GN=BJ122_12152 PE=3 SV=1	6.59928	2.80026e-06
tr|A0A7H0XVR5|A0A7H0XVR5_RHOCA	1	Acetyl-CoA C-acetyltransferase OS=Rhodobacter capsulatus OX=1061 GN=H9N28_15470 PE=3 SV=1	6.51373	0.0134132
tr|A0A318T7Y9|A0A318T7Y9_9BRAD	1	Acetyl-coenzyme A carboxylase carboxyl transferase subunit alpha OS=Rhodopseudomonas faecalis OX=99655 GN=accA PE=3 SV=1	4.25146	1.17335e-06
tr|A0A318TJ62|A0A318TJ62_9BRAD	5	Acetyl-coenzyme A synthetase OS=Rhodopseudomonas faecalis OX=99655 GN=acsA PE=3 SV=1	1.83844	3.29048e-05
tr|A0A318T7D8|A0A318T7D8_9BRAD	3	Acetylornithine aminotransferase OS=Rhodopseudomonas faecalis OX=99655 GN=argD PE=3 SV=1	1.8594	0.000590836
tr|A0A7H0XS63|A0A7H0XS63_RHOCA	1	Aconitate hydratase OS=Rhodobacter capsulatus OX=1061 GN=acnA PE=3 SV=1	0.424299	0.0064333
tr|Q3J5I1|Q3J5I1_RHOS4	1	Aconitate hydratase OS=Rhodobacter sphaeroides (strain ATCC 17023 / 2.4.1 / NCIB 8253 / DSM 158) OX=272943 GN=RSP_1806 PE=3 SV=2	0.257046	0.00071134
tr|A0A318TJS6|A0A318TJS6_9BRAD	5	Aconitate hydratase OS=Rhodopseudomonas faecalis OX=99655 GN=BJ122_11440 PE=3 SV=1	1.40275	0.0368409
tr|A0A318TFG3|A0A318TFG3_9BRAD	1	Acyl carrier protein OS=Rhodopseudomonas faecalis OX=99655 GN=acpP PE=3 SV=1	3.00624	0.0207197
sp|Q7M9W1|ACP_WOLSU	1	Acyl carrier protein OS=Wolinella succinogenes (strain ATCC 29543 / DSM 1740 / LMG 7466 / NCTC 11488 / FDC 602W) OX=273121 GN=acpP PE=3 SV=1	0.215666	0.000682222
tr|A0A318TQH8|A0A318TQH8_9BRAD	1	Acyl-CoA dehydrogenase OS=Rhodopseudomonas faecalis OX=99655 GN=BJ122_11631 PE=3 SV=1	1.85855	0.0408099
sp|B8DR41|SAHH_DESVM	1	Adenosylhomocysteinase OS=Desulfovibrio vulgaris (strain Miyazaki F / DSM 19637) OX=883 GN=ahcY PE=3 SV=1	2.25276	0.0118104
tr|A0A318T8E0|A0A318T8E0_9BRAD	8	Adenosylhomocysteinase OS=Rhodopseudomonas faecalis OX=99655 GN=ahcY PE=3 SV=1	1.73855	3.05947e-06
tr|Q3J5Q1|Q3J5Q1_RHOS4	1	Adenylate kinase OS=Rhodobacter sphaeroides (strain ATCC 17023 / 2.4.1 / NCIB 8253 / DSM 158) OX=272943 GN=adk PE=3 SV=1	2.85112	5.16864e-05
tr|A0A318TA69|A0A318TA69_9BRAD	2	Adenylate kinase OS=Rhodopseudomonas faecalis OX=99655 GN=adk PE=3 SV=1	1.9394	0.000796547
tr|A0A318TJH8|A0A318TJH8_9BRAD	1	Adenylosuccinate lyase OS=Rhodopseudomonas faecalis OX=99655 GN=BJ122_1029 PE=3 SV=1	0.236783	0.00840159
tr|Q7MA83|Q7MA83_WOLSU	2	Adenylosuccinate lyase OS=Wolinella succinogenes (strain ATCC 29543 / DSM 1740 / LMG 7466 / NCTC 11488 / FDC 602W) OX=273121 GN=PURB PE=3 SV=1	0.69162	0.0406765
tr|A0A318TJF3|A0A318TJF3_9BRAD	1	Adenylosuccinate synthetase OS=Rhodopseudomonas faecalis OX=99655 GN=purA PE=3 SV=1	2.52669	0.0238472
sp|Q7M7V8|PURA_WOLSU	1	Adenylosuccinate synthetase OS=Wolinella succinogenes (strain ATCC 29543 / DSM 1740 / LMG 7466 / NCTC 11488 / FDC 602W) OX=273121 GN=purA PE=3 SV=1	0.256915	4.13638e-06
tr|A0A1G7FDY8|A0A1G7FDY8_RHOCA	1	Alanine dehydrogenase OS=Rhodobacter capsulatus OX=1061 GN=SAMN04244550_00953 PE=3 SV=1	2.23143	0.0206113
tr|B9KKJ6|B9KKJ6_RHOSK	2	Alanine--tRNA ligase OS=Rhodobacter sphaeroides (strain KD131 / KCTC 12085) OX=557760 GN=alaS PE=3 SV=1	0.302926	0.000924631
tr|A0A318TK87|A0A318TK87_9BRAD	3	Aldehyde dehydrogenase (NAD+) OS=Rhodopseudomonas faecalis OX=99655 GN=BJ122_10138 PE=4 SV=1	2.32374	0.000191577
tr|R2NKD2|R2NKD2_9ENTE	2	Aldehyde-alcohol dehydrogenase OS=Enterococcus malodoratus ATCC 43197 OX=1158601 GN=UAI_04082 PE=3 SV=1	0.120821	0.0218249
tr|A0A679IR42|A0A679IR42_9ENTE	2	Aldehyde-alcohol dehydrogenase OS=Enterococcus saigonensis OX=1805431 GN=aad PE=3 SV=1	0.135281	0.0165688
tr|A3QAW0|A3QAW0_SHELP	1	Aldo/keto reductase OS=Shewanella loihica (strain ATCC BAA-1088 / PV-4) OX=323850 GN=Shew_0736 PE=4 SV=1	0.346291	0.0198016
tr|A0A318TK42|A0A318TK42_9BRAD	3	Alkyl hydroperoxide reductase C OS=Rhodopseudomonas faecalis OX=99655 GN=BJ122_104157 PE=3 SV=1	2.53552	0.00127092
tr|Q7M8C0|Q7M8C0_WOLSU	1	Alkyl hydroperoxide reductase C OS=Wolinella succinogenes (strain ATCC 29543 / DSM 1740 / LMG 7466 / NCTC 11488 / FDC 602W) OX=273121 GN=AHPC1 PE=3 SV=1	4.68654	0.00332504
tr|A0A318TG50|A0A318TG50_9BRAD	1	Alpha-ketoglutarate dehydrogenase OS=Rhodopseudomonas faecalis OX=99655 GN=BJ122_11423 PE=3 SV=1	2.11936	0.00282729
tr|A0A330H5Q3|A0A330H5Q3_9RHOB	1	Amino acid ABC transporter OS=Rhodobacter johrii OX=445629 GN=DDV93_17005 PE=4 SV=1	2.22948	0.0102827
tr|A0A318TLN8|A0A318TLN8_9BRAD	9	Amino acid ABC transporter substrate-binding protein (PAAT family) OS=Rhodopseudomonas faecalis OX=99655 GN=BJ122_101318 PE=3 SV=1	2.04954	0.000655805
tr|A0A3D1U849|A0A3D1U849_9DELT	2	Amino acid ABC transporter substrate-binding protein OS=Desulfovibrio sp. OX=885 GN=DEV75_07820 PE=3 SV=1	0.598812	0.0253511
tr|A0A2T4J6W2|A0A2T4J6W2_RHOBL	2	Amino acid ABC transporter substrate-binding protein OS=Rhodobacter blasticus DSM 2131 OX=1188250 GN=C5F44_12630 PE=4 SV=1	1.61377	0.0328372
tr|A0A7H0XXM3|A0A7H0XXM3_RHOCA	4	Amino acid ABC transporter substrate-binding protein OS=Rhodobacter capsulatus OX=1061 GN=H9N28_01700 PE=3 SV=1	2.50922	0.0361369
tr|A0A330HGY0|A0A330HGY0_9RHOB	9	Amino acid ABC transporter substrate-binding protein OS=Rhodobacter johrii OX=445629 GN=DDV93_03645 PE=4 SV=1	2.15936	0.00140055
tr|A0A318TL13|A0A318TL13_9BRAD	1	Amino acid/amide ABC transporter ATP-binding protein 1 (HAAT family) OS=Rhodopseudomonas faecalis OX=99655 GN=BJ122_103171 PE=4 SV=1	0.209636	1.39651e-05
tr|A0A318TYT5|A0A318TYT5_9BRAD	1	Amino acid/amide ABC transporter substrate-binding protein (HAAT family) OS=Rhodopseudomonas faecalis OX=99655 GN=BJ122_10214 PE=3 SV=1	1.78242	0.000809529
tr|A0A318TIK0|A0A318TIK0_9BRAD	4	Amino acid/amide ABC transporter substrate-binding protein (HAAT family) OS=Rhodopseudomonas faecalis OX=99655 GN=BJ122_103168 PE=4 SV=1	3.75314	1.45526e-06
tr|A0A318TIY1|A0A318TIY1_9BRAD	6	Amino acid/amide ABC transporter substrate-binding protein (HAAT family) OS=Rhodopseudomonas faecalis OX=99655 GN=BJ122_10326 PE=3 SV=1	1.62185	0.00293544
tr|A0A318T9V8|A0A318T9V8_9BRAD	5	Amino acid/amide ABC transporter substrate-binding protein (HAAT family) OS=Rhodopseudomonas faecalis OX=99655 GN=BJ122_12272 PE=4 SV=1	2.90573	0.000280489
tr|A0A318T8Z8|A0A318T8Z8_9BRAD	5	Amino acid/amide ABC transporter substrate-binding protein (HAAT family) OS=Rhodopseudomonas faecalis OX=99655 GN=BJ122_12633 PE=4 SV=1	3.03926	4.3501e-05
tr|A0A318T788|A0A318T788_9BRAD	6	Amino acid/amide ABC transporter substrate-binding protein (HAAT family) OS=Rhodopseudomonas faecalis OX=99655 GN=BJ122_13317 PE=4 SV=1	1.59091	0.00993234
tr|A0A318TAN8|A0A318TAN8_9BRAD	9	Amino acid/amide ABC transporter substrate-binding protein (HAAT family) OS=Rhodopseudomonas faecalis OX=99655 GN=BJ122_1375 PE=4 SV=1	2.07821	0.00393177
tr|A0A063CRE9|A0A063CRE9_BACCE	1	Aminopeptidase P family protein OS=Bacillus cereus OX=1396 GN=pepQ PE=4 SV=1	7.10447	0.000825574
tr|A0A318TF62|A0A318TF62_9BRAD	1	Aminotransferase OS=Rhodopseudomonas faecalis OX=99655 GN=BJ122_10632 PE=3 SV=1	1.50194	0.00513897
tr|Q9ZEN8|Q9ZEN8_WOLSC	1	Anaerobic C4-dicarboxylate transporter OS=Wolinella succinogenes OX=844 GN=dcuB PE=3 SV=1	0.252583	0.00132978
tr|A0A318TC38|A0A318TC38_9BRAD	4	Anaerobic Mg-protoporphyrin IX monomethyl ester oxidative cyclase OS=Rhodopseudomonas faecalis OX=99655 GN=BJ122_1119 PE=4 SV=1	2.39468	2.21021e-05
tr|D5AMI4|D5AMI4_RHOCB	1	Antenna pigment protein beta chain OS=Rhodobacter capsulatus (strain ATCC BAA-309 / NBRC 16581 / SB1003) OX=272942 GN=pucB PE=3 SV=1	0.298434	0.00383224
sp|Q7MAC9|ARGJ_WOLSU	1	Arginine biosynthesis bifunctional protein ArgJ OS=Wolinella succinogenes (strain ATCC 29543 / DSM 1740 / LMG 7466 / NCTC 11488 / FDC 602W) OX=273121 GN=argJ PE=3 SV=1	0.252294	0.00461786
tr|A0A318TNQ5|A0A318TNQ5_9BRAD	1	Arginine--tRNA ligase OS=Rhodopseudomonas faecalis OX=99655 GN=argS PE=3 SV=1	3.00449	0.00443246
tr|A0A330HH35|A0A330HH35_9RHOB	1	Argininosuccinate synthase OS=Rhodobacter johrii OX=445629 GN=argG PE=3 SV=1	3.66028	0.00681979
tr|A0A318TA84|A0A318TA84_9BRAD	1	Argininosuccinate synthase OS=Rhodopseudomonas faecalis OX=99655 GN=argG PE=3 SV=1	1.62975	0.0111231
tr|A0A418VM34|A0A418VM34_RHOPL	1	Argininosuccinate synthase OS=Rhodopseudomonas palustris OX=1076 GN=argG PE=3 SV=1	2.16717	0.0220273
sp|Q7M7P6|ASSY_WOLSU	4	Argininosuccinate synthase OS=Wolinella succinogenes (strain ATCC 29543 / DSM 1740 / LMG 7466 / NCTC 11488 / FDC 602W) OX=273121 GN=argG PE=3 SV=1	0.58459	0.00989483
tr|A0A330HC46|A0A330HC46_9RHOB	1	Aromatic amino acid aminotransferase OS=Rhodobacter johrii OX=445629 GN=DDV93_07400 PE=3 SV=1	1.69276	0.0456638
tr|Q7MAU2|Q7MAU2_WOLSU	1	ASPARTATE AMINOTRANSFERASE OS=Wolinella succinogenes (strain ATCC 29543 / DSM 1740 / LMG 7466 / NCTC 11488 / FDC 602W) OX=273121 GN=WS0024 PE=3 SV=1	0.210075	2.40406e-05
tr|A0A318TEM7|A0A318TEM7_9BRAD	2	Aspartate--tRNA(Asp/Asn) ligase OS=Rhodopseudomonas faecalis OX=99655 GN=aspS PE=3 SV=1	1.76928	0.0105126
sp|Q7M8A6|SYDND_WOLSU	2	Aspartate--tRNA(Asp/Asn) ligase OS=Wolinella succinogenes (strain ATCC 29543 / DSM 1740 / LMG 7466 / NCTC 11488 / FDC 602W) OX=273121 GN=aspS PE=3 SV=1	0.570175	0.00337413
tr|A0A318T8P0|A0A318T8P0_9BRAD	4	Aspartokinase OS=Rhodopseudomonas faecalis OX=99655 GN=BJ122_12162 PE=3 SV=1	0.637604	0.00666474
tr|A0A7H0XV71|A0A7H0XV71_RHOCA	2	ATP synthase epsilon chain OS=Rhodobacter capsulatus OX=1061 GN=atpC PE=3 SV=1	2.75244	0.00617817
tr|A0A318T9D8|A0A318T9D8_9BRAD	2	ATP synthase epsilon chain OS=Rhodopseudomonas faecalis OX=99655 GN=atpC PE=3 SV=1	3.83229	1.97548e-06
sp|Q7MSF4|ATPE_WOLSU	1	ATP synthase epsilon chain OS=Wolinella succinogenes (strain ATCC 29543 / DSM 1740 / LMG 7466 / NCTC 11488 / FDC 602W) OX=273121 GN=atpC PE=3 SV=1	0.429791	0.0111235
tr|A0A318T966|A0A318T966_9BRAD	6	ATP synthase gamma chain OS=Rhodopseudomonas faecalis OX=99655 GN=atpG PE=3 SV=1	2.09512	0.000164352
sp|Q7MA19|ATPG_WOLSU	5	ATP synthase gamma chain OS=Wolinella succinogenes (strain ATCC 29543 / DSM 1740 / LMG 7466 / NCTC 11488 / FDC 602W) OX=273121 GN=atpG PE=3 SV=1	0.696547	0.0154496
tr|A0A330HGA9|A0A330HGA9_9RHOB	2	ATP synthase subunit alpha OS=Rhodobacter johrii OX=445629 GN=atpA PE=3 SV=1	2.40291	0.000316804
tr|A0A318TYK3|A0A318TYK3_9RHOB	2	ATP synthase subunit alpha OS=Rhodobacter viridis OX=1054202 GN=atpA PE=3 SV=1	3.07755	0.0135695
tr|A0A318T9I3|A0A318T9I3_9BRAD	5	ATP synthase subunit alpha OS=Rhodopseudomonas faecalis OX=99655 GN=atpA PE=3 SV=1	2.047	0.000114274
sp|Q7MA20|ATPA_WOLSU	11	ATP synthase subunit alpha OS=Wolinella succinogenes (strain ATCC 29543 / DSM 1740 / LMG 7466 / NCTC 11488 / FDC 602W) OX=273121 GN=atpA PE=3 SV=1	0.477381	0.00408094
tr|A0A330HBV3|A0A330HBV3_9RHOB	1	ATP synthase subunit b OS=Rhodobacter johrii OX=445629 GN=atpF PE=3 SV=1	1.60211	0.0433506
tr|E6VBR5|E6VBR5_RHOPX	1	ATP synthase subunit b OS=Rhodopseudomonas palustris (strain DX-1) OX=652103 GN=atpF PE=3 SV=1	0.507078	0.00882788
tr|A0A0Q0QUZ8|A0A0Q0QUZ8_RHOCA	1	ATP synthase subunit beta OS=Rhodobacter capsulatus OX=1061 GN=atpD PE=3 SV=1	5.10394	0.0207585
tr|A0A330HJF7|A0A330HJF7_9RHOB	4	ATP synthase subunit beta OS=Rhodobacter johrii OX=445629 GN=atpD PE=3 SV=1	4.40118	0.000199766
tr|A0A318THG8|A0A318THG8_9BRAD	6	ATP synthase subunit beta OS=Rhodopseudomonas faecalis OX=99655 GN=atpD PE=3 SV=1	2.26838	0.00050771
sp|P42470|ATPB_WOLSU	13	ATP synthase subunit beta OS=Wolinella succinogenes (strain ATCC 29543 / DSM 1740 / LMG 7466 / NCTC 11488 / FDC 602W) OX=273121 GN=atpD PE=3 SV=1	0.441327	0.00770886
tr|A0A7H0XV75|A0A7H0XV75_RHOCA	1	ATP synthase subunit delta OS=Rhodobacter capsulatus OX=1061 GN=atpH PE=3 SV=1	4.51974	0.00194408
tr|A0A318TKZ0|A0A318TKZ0_9BRAD	5	ATP-dependent Clp protease ATP-binding subunit ClpX OS=Rhodopseudomonas faecalis OX=99655 GN=clpX PE=3 SV=1	1.41355	0.0100278
tr|A0A318T7X4|A0A318T7X4_9BRAD	1	ATP-dependent RNA helicase SUPV3L1/SUV3 OS=Rhodopseudomonas faecalis OX=99655 GN=BJ122_12535 PE=4 SV=1	2.69702	0.000178767
tr|S4D1G9|S4D1G9_ENTFL	2	ATP-dependent zinc metalloprotease FtsH OS=Enterococcus faecalis 13-SD-W-01 OX=1260356 GN=ftsH PE=3 SV=1	0.373969	0.0099906
tr|B6WS60|B6WS60_9DELT	1	Auxiliary transport protein, membrane fusion protein (MFP) family protein OS=Desulfovibrio piger ATCC 29098 OX=411464 GN=DESPIG_00906 PE=4 SV=1	0.612004	0.0155537
tr|G2H980|G2H980_9DELT	1	Bacterial DNA-binding family protein OS=Desulfovibrio sp. A2 OX=298701 GN=DA2_2325 PE=3 SV=1	0.337749	0.0156571
tr|Q3IWY8|Q3IWY8_RHOS4	3	Bacterioferritin OS=Rhodobacter sphaeroides (strain ATCC 17023 / 2.4.1 / NCIB 8253 / DSM 158) OX=272943 GN=bfr PE=3 SV=1	4.99548	0.00188974
tr|S4AQW0|S4AQW0_ENTCA	1	Band_7_1 domain-containing protein OS=Enterococcus casseliflavus 14-MB-W-14 OX=1259825 GN=D932_03488 PE=4 SV=1	2.56058	0.00582322
tr|R2PPM6|R2PPM6_9ENTE	1	Basic membrane lipopprotein OS=Enterococcus asini ATCC 700915 OX=1158606 GN=UAS_02165 PE=3 SV=1	0.477289	0.0262246
tr|F3LMB1|F3LMB1_9BURK	1	Basic membrane lipoprotein OS=Rubrivivax benzoatilyticus JA2 = ATCC BAA-35 OX=987059 GN=RBXJA2T_04088 PE=4 SV=1	0.449505	0.0311656
tr|A0A318T7H8|A0A318T7H8_9BRAD	1	Beta sliding clamp OS=Rhodopseudomonas faecalis OX=99655 GN=BJ122_1298 PE=3 SV=1	0.551103	5.72428e-05
sp|Q7MA56|RPOBC_WOLSU	13	Bifunctional DNA-directed RNA polymerase subunit beta-beta' OS=Wolinella succinogenes (strain ATCC 29543 / DSM 1740 / LMG 7466 / NCTC 11488 / FDC 602W) OX=273121 GN=rpoBC PE=3 SV=1	0.622341	0.00433844
tr|A0A318TQC0|A0A318TQC0_9BRAD	1	Bifunctional enzyme IspD/IspF OS=Rhodopseudomonas faecalis OX=99655 GN=ispDF PE=3 SV=1	0.408176	0.00102319
tr|A0A318T8L9|A0A318T8L9_9BRAD	3	Bifunctional purine biosynthesis protein PurH OS=Rhodopseudomonas faecalis OX=99655 GN=purH PE=3 SV=1	1.38773	0.00293772
tr|Q7M999|Q7M999_WOLSU	2	Biotin carboxyl carrier protein of acetyl-CoA carboxylase OS=Wolinella succinogenes (strain ATCC 29543 / DSM 1740 / LMG 7466 / NCTC 11488 / FDC 602W) OX=273121 GN=ACCB PE=4 SV=1	0.209424	0.0120354
tr|A0A318TF40|A0A318TF40_9BRAD	1	Biotin carboxylase OS=Rhodopseudomonas faecalis OX=99655 GN=BJ122_10673 PE=4 SV=1	0.594378	8.43599e-05
tr|A0A679IAY9|A0A679IAY9_9ENTE	2	BMP family ABC transporter substrate-binding protein OS=Enterococcus saigonensis OX=1805431 GN=EsVE80_23310 PE=3 SV=1	0.168489	0.000228176
tr|A0A7H0XYX8|A0A7H0XYX8_RHOCA	2	BMP family ABC transporter substrate-binding protein OS=Rhodobacter capsulatus OX=1061 GN=H9N28_04130 PE=4 SV=1	9.70693	0.00442694
tr|A0A330GZU8|A0A330GZU8_9RHOB	2	BMP family ABC transporter substrate-binding protein OS=Rhodobacter johrii OX=445629 GN=DDV93_22270 PE=3 SV=1	2.94945	0.000246885
tr|A0A330HAS4|A0A330HAS4_9RHOB	2	Branched-chain amino acid ABC transporter substrate-binding protein OS=Rhodobacter johrii OX=445629 GN=DDV93_14405 PE=4 SV=1	2.13967	0.00400453
tr|Q7MAQ7|Q7MAQ7_WOLSU	2	Branched-chain-amino-acid aminotransferase OS=Wolinella succinogenes (strain ATCC 29543 / DSM 1740 / LMG 7466 / NCTC 11488 / FDC 602W) OX=273121 GN=ILVE PE=3 SV=1	0.400348	0.000972127
tr|A0A318TKC9|A0A318TKC9_9BRAD	11	C4-dicarboxylate-binding protein DctP OS=Rhodopseudomonas faecalis OX=99655 GN=BJ122_1018 PE=3 SV=1	1.95947	4.34592e-06
tr|Q7MSR2|Q7MSR2_WOLSU	3	CADF OS=Wolinella succinogenes (strain ATCC 29543 / DSM 1740 / LMG 7466 / NCTC 11488 / FDC 602W) OX=273121 GN=CADF PE=4 SV=1	0.463916	0.0186558
tr|A0A388SFP1|A0A388SFP1_9DELT	1	Catalase OS=Desulfovibrio sp. HK-II OX=2009266 GN=RVX_0149 PE=3 SV=1	1.58105	0.0164793
tr|A0A318THI8|A0A318THI8_9BRAD	3	Catalase-peroxidase OS=Rhodopseudomonas faecalis OX=99655 GN=katG PE=3 SV=1	1.63969	0.0153744
tr|Q7M902|Q7M902_WOLSU	4	CELL BINDING FACTOR 2 MAJOR ANTIGEN PEB4A OS=Wolinella succinogenes (strain ATCC 29543 / DSM 1740 / LMG 7466 / NCTC 11488 / FDC 602W) OX=273121 GN=WS1281 PE=4 SV=1	0.312772	0.000120199
tr|Q07IN9|Q07IN9_RHOP5	1	Cell cycle transcriptional regulator CtrA / two component transcriptional regulator, winged helix family OS=Rhodopseudomonas palustris (strain BisA53) OX=316055 GN=RPE_4270 PE=4 SV=1	2.37887	0.0176561
tr|A0A318TGK4|A0A318TGK4_9BRAD	1	Cell division coordinator CpoB OS=Rhodopseudomonas faecalis OX=99655 GN=cpoB PE=3 SV=1	0.343233	0.000720582
tr|A0A1L8QRZ3|A0A1L8QRZ3_9ENTE	1	Cell division protein FtsZ OS=Enterococcus aquimarinus OX=328396 GN=ftsZ PE=3 SV=1	0.341149	0.0345122
tr|Q7MAS5|Q7MAS5_WOLSU	1	Cell shape-determining protein MreB OS=Wolinella succinogenes (strain ATCC 29543 / DSM 1740 / LMG 7466 / NCTC 11488 / FDC 602W) OX=273121 GN=MREB PE=3 SV=1	0.427203	0.0494157
tr|A0A318TC87|A0A318TC87_9BRAD	1	Chaperone protein ClpB OS=Rhodopseudomonas faecalis OX=99655 GN=clpB PE=3 SV=1	4.52455	9.56273e-07
tr|A0A3D1U5G3|A0A3D1U5G3_9DELT	1	Chaperone protein DnaK OS=Desulfovibrio sp. OX=885 GN=dnaK PE=2 SV=1	0.379627	0.00349259
tr|A0A318TB09|A0A318TB09_9BRAD	2	Chaperone protein DnaK OS=Rhodopseudomonas faecalis OX=99655 GN=dnaK PE=2 SV=1	2.22304	0.000518808
sp|Q7MA35|DNAK_WOLSU	15	Chaperone protein DnaK OS=Wolinella succinogenes (strain ATCC 29543 / DSM 1740 / LMG 7466 / NCTC 11488 / FDC 602W) OX=273121 GN=dnaK PE=3 SV=1	0.504448	0.014175
tr|A0A318TFZ6|A0A318TFZ6_9BRAD	3	Chlorophyllide reductase iron protein subunit X OS=Rhodopseudomonas faecalis OX=99655 GN=BJ122_110114 PE=3 SV=1	1.2997	0.0130086
tr|A0A318TC70|A0A318TC70_9BRAD	1	Chromosome partitioning protein OS=Rhodopseudomonas faecalis OX=99655 GN=BJ122_11139 PE=4 SV=1	0.277602	0.0340629
tr|A0A318TBQ4|A0A318TBQ4_9BRAD	1	Chromosome segregation DNA-binding protein OS=Rhodopseudomonas faecalis OX=99655 GN=BJ122_11293 PE=3 SV=1	3.37787	0.000352056
tr|A0A0Q0WES2|A0A0Q0WES2_RHOCA	2	Citrate synthase OS=Rhodobacter capsulatus OX=1061 GN=SAMN04244550_00335 PE=3 SV=1	1.79196	0.0035635
tr|A0A318TKR2|A0A318TKR2_9BRAD	3	Citrate synthase OS=Rhodopseudomonas faecalis OX=99655 GN=BJ122_101151 PE=3 SV=1	1.95371	0.000720525
tr|A0A318TLX9|A0A318TLX9_9BRAD	4	Citrate synthase OS=Rhodopseudomonas faecalis OX=99655 GN=BJ122_101226 PE=3 SV=1	1.55194	0.00317569
tr|A0A318TB74|A0A318TB74_9BRAD	1	Citronellol/citronellal dehydrogenase OS=Rhodopseudomonas faecalis OX=99655 GN=BJ122_12927 PE=4 SV=1	0.473702	0.0495119
tr|Q7MRU7|Q7MRU7_WOLSU	2	CoA_binding domain-containing protein OS=Wolinella succinogenes (strain ATCC 29543 / DSM 1740 / LMG 7466 / NCTC 11488 / FDC 602W) OX=273121 GN=WS1029 PE=4 SV=1	0.767109	0.0310583
tr|A0A330HF08|A0A330HF08_9RHOB	2	Cobalt transporter OS=Rhodobacter johrii OX=445629 GN=DDV93_10640 PE=4 SV=1	1.9008	0.014633
tr|A0A520BYJ3|A0A520BYJ3_9BURK	1	Cold shock domain-containing protein OS=Rubrivivax sp. OX=50259 GN=EOP35_06965 PE=4 SV=1	2.32962	0.00259892
tr|S0JP26|S0JP26_9ENTE	1	Cold shock-like protein CspD OS=Enterococcus saccharolyticus subsp. saccharolyticus ATCC 43076 OX=1139996 GN=OMQ_00955 PE=4 SV=1	0.54342	0.0230841
tr|D5AR60|D5AR60_RHOCB	1	Cold shock-like protein CspD OS=Rhodobacter capsulatus (strain ATCC BAA-309 / NBRC 16581 / SB1003) OX=272942 GN=cspD PE=4 SV=1	5.71543	0.031257
tr|S1P2J3|S1P2J3_9ENTE	2	Cold shock-like protein CspLA OS=Enterococcus dispar ATCC 51266 OX=1139219 GN=OMK_01225 PE=4 SV=1	0.54808	0.00346434
tr|A0A242KE91|A0A242KE91_9ENTE	1	Cold shock-like protein CspLA OS=Enterococcus sp. 9E7_DIV0242 OX=1834193 GN=A5888_001089 PE=4 SV=1	0.301944	0.0096886
tr|Q3J0X3|Q3J0X3_RHOS4	1	Cold-shock DNA-binding protein family OS=Rhodobacter sphaeroides (strain ATCC 17023 / 2.4.1 / NCIB 8253 / DSM 158) OX=272943 GN=RSP_0386 PE=4 SV=1	5.97866	0.00981881
tr|Q3J0B8|Q3J0B8_RHOS4	1	Cold-shock DNA-binding protein family OS=Rhodobacter sphaeroides (strain ATCC 17023 / 2.4.1 / NCIB 8253 / DSM 158) OX=272943 GN=RSP_0591 PE=4 SV=1	3.04004	0.0479244
tr|Q21AW7|Q21AW7_RHOPB	1	Cold-shock DNA-binding protein family OS=Rhodopseudomonas palustris (strain BisB18) OX=316056 GN=RPC_0899 PE=4 SV=1	3.42684	0.0143866
tr|A0A318TND8|A0A318TND8_9BRAD	1	CreA protein OS=Rhodopseudomonas faecalis OX=99655 GN=BJ122_101129 PE=4 SV=1	1.80407	0.0027027
tr|A0A239F133|A0A239F133_9RHOB	1	CRISPR system Cascade subunit CasC OS=Rhodobacter megalophilus OX=418630 GN=SAMN05421763_10212 PE=4 SV=1	3.32183	1.97996e-05
tr|A0A318T9R4|A0A318T9R4_9BRAD	1	CRISPR-associated Csd1 family protein OS=Rhodopseudomonas faecalis OX=99655 GN=BJ122_12220 PE=4 SV=1	0.298556	0.0270088
tr|A0A318TC69|A0A318TC69_9BRAD	3	CRISPR-associated Csd2 family protein OS=Rhodopseudomonas faecalis OX=99655 GN=BJ122_12221 PE=4 SV=1	1.98425	0.00415716
tr|B3QKU2|B3QKU2_RHOPT	1	CsbD family protein OS=Rhodopseudomonas palustris (strain TIE-1) OX=395960 GN=Rpal_4698 PE=3 SV=1	4.59504	0.00819682
tr|A0A318TCV3|A0A318TCV3_9BRAD	1	CubicO group peptidase (Beta-lactamase class C family) OS=Rhodopseudomonas faecalis OX=99655 GN=BJ122_11954 PE=4 SV=1	0.202858	0.00305611
tr|A0A318TE38|A0A318TE38_9BRAD	5	CubicO group peptidase (Beta-lactamase class C family) OS=Rhodopseudomonas faecalis OX=99655 GN=BJ122_1216 PE=4 SV=1	1.47594	0.0399297
tr|A0A5B8R4Q4|A0A5B8R4Q4_9GAMM	1	Cupin domain-containing protein OS=Shewanella decolorationis OX=256839 GN=D0436_23145 PE=4 SV=1	1.80887	0.0174463
tr|V5XLS6|V5XLS6_ENTMU	1	Cystathionine gamma-synthase OS=Enterococcus mundtii QU 25 OX=1300150 GN=metC PE=3 SV=1	3.20123	0.0290379
tr|A0A318TIA3|A0A318TIA3_9BRAD	2	Cytochrome b OS=Rhodopseudomonas faecalis OX=99655 GN=BJ122_10357 PE=3 SV=1	3.00562	0.000212615
tr|A0A330H898|A0A330H898_9RHOB	2	Cytochrome C OS=Rhodobacter johrii OX=445629 GN=DDV93_16615 PE=4 SV=1	1.6542	0.0246787
tr|A0A318TD31|A0A318TD31_9BRAD	6	Cytochrome c OS=Rhodopseudomonas faecalis OX=99655 GN=BJ122_110128 PE=4 SV=1	4.28558	4.16734e-06
tr|F3LR89|F3LR89_9BURK	1	Cytochrome c prime OS=Rubrivivax benzoatilyticus JA2 = ATCC BAA-35 OX=987059 GN=RBXJA2T_11046 PE=4 SV=1	0.491412	0.0470246
tr|A0A7H0XUS3|A0A7H0XUS3_RHOCA	3	Cytochrome c1 OS=Rhodobacter capsulatus OX=1061 GN=H9N28_13620 PE=4 SV=1	3.14077	0.00011957
tr|A0A330HLV6|A0A330HLV6_9RHOB	1	Cytochrome c1 OS=Rhodobacter johrii OX=445629 GN=DDV93_04785 PE=4 SV=1	2.02811	0.0399269
sp|Q9S1E5|NRFA_WOLSU	2	Cytochrome c-552 OS=Wolinella succinogenes (strain ATCC 29543 / DSM 1740 / LMG 7466 / NCTC 11488 / FDC 602W) OX=273121 GN=nrfA PE=1 SV=2	0.369072	0.0386247
tr|A0A0Q0QW64|A0A0Q0QW64_RHOCA	1	Cytochrome c556 OS=Rhodobacter capsulatus OX=1061 GN=SAMN04244550_02505 PE=4 SV=1	10.9932	0.00235376
tr|A0A4Q0MR65|A0A4Q0MR65_9DELT	2	Cytochrome-c3 hydrogenase OS=Desulfovibrio sp. DS-1 OX=2497683 GN=EKK70_11720 PE=3 SV=1	0.517086	0.00664202
tr|A0A318T9W3|A0A318T9W3_9BRAD	8	Cytochrome-dependent sulfide dehydrogenase (Flavoprotein) OS=Rhodopseudomonas faecalis OX=99655 GN=BJ122_11654 PE=4 SV=1	2.16956	0.000149853
tr|A0A330HDT8|A0A330HDT8_9RHOB	2	D-3-phosphoglycerate dehydrogenase OS=Rhodobacter johrii OX=445629 GN=DDV93_04990 PE=3 SV=1	2.67847	0.00525172
tr|A0A318TJE5|A0A318TJE5_9BRAD	5	D-3-phosphoglycerate dehydrogenase OS=Rhodopseudomonas faecalis OX=99655 GN=BJ122_11514 PE=3 SV=1	1.97295	0.000272733
tr|Q7M8Y4|Q7M8Y4_WOLSU	3	D-3-phosphoglycerate dehydrogenase OS=Wolinella succinogenes (strain ATCC 29543 / DSM 1740 / LMG 7466 / NCTC 11488 / FDC 602W) OX=273121 GN=SERA PE=3 SV=1	0.620627	0.00442697
tr|A0A3S0IQ96|A0A3S0IQ96_9GAMM	1	DctA-YdbH domain-containing protein OS=Shewanella canadensis OX=271096 GN=EKG38_07140 PE=4 SV=1	3.04799	0.00563769
tr|A0A3G6WR91|A0A3G6WR91_RHOSH	7	DctP family TRAP transporter solute-binding subunit OS=Rhodobacter sphaeroides OX=1063 GN=EBL86_13825 PE=3 SV=1	2.57004	0.00222325
tr|A0A318TPG9|A0A318TPG9_9BRAD	7	Delta-aminolevulinic acid dehydratase OS=Rhodopseudomonas faecalis OX=99655 GN=BJ122_10562 PE=3 SV=1	2.00427	0.000302035
tr|A0A7C9NSZ0|A0A7C9NSZ0_RHOSU	1	Delta-aminolevulinic acid dehydratase OS=Rhodovulum sulfidophilum OX=35806 GN=hemB PE=3 SV=1	3.60173	3.83184e-07
tr|A0A4Q0MS37|A0A4Q0MS37_9DELT	2	Desulfoferrodoxin OS=Desulfovibrio sp. DS-1 OX=2497683 GN=EKK70_13915 PE=3 SV=1	0.245408	0.0187464
tr|Q7M7L8|Q7M7L8_WOLSU	1	DHOdehase OS=Wolinella succinogenes (strain ATCC 29543 / DSM 1740 / LMG 7466 / NCTC 11488 / FDC 602W) OX=273121 GN=PYRD PE=3 SV=1	2.52607	0.00495612
tr|B9KNB0|B9KNB0_RHOSK	1	Dihydrolipoyllysine-residue succinyltransferase component of 2-oxoglutarate dehydrogenase complex OS=Rhodobacter sphaeroides (strain KD131 / KCTC 12085) OX=557760 GN=RSKD131_2356 PE=3 SV=1	7.39662	0.00167909
sp|Q7MAN4|ILVD_WOLSU	1	Dihydroxy-acid dehydratase OS=Wolinella succinogenes (strain ATCC 29543 / DSM 1740 / LMG 7466 / NCTC 11488 / FDC 602W) OX=273121 GN=ilvD PE=3 SV=1	0.43473	0.0207644
tr|O86965|O86965_9DELT	1	Dissimilatory sulfite reductase beta subunit (Fragment) OS=Desulfovibrio sp. PT-2 OX=77909 GN=dsrB PE=4 SV=2	2.51724	0.000465776
tr|A0A318TG34|A0A318TG34_9BRAD	3	D-methionine transport system substrate-binding protein OS=Rhodopseudomonas faecalis OX=99655 GN=BJ122_105149 PE=3 SV=1	4.22873	0.000660506
tr|Q7MAV1|Q7MAV1_WOLSU	1	DNA gyrase subunit B OS=Wolinella succinogenes (strain ATCC 29543 / DSM 1740 / LMG 7466 / NCTC 11488 / FDC 602W) OX=273121 GN=gyrB PE=3 SV=1	0.241801	0.000155998
tr|A0A0Q0QK62|A0A0Q0QK62_RHOCA	2	DNA-binding protein H-NS OS=Rhodobacter capsulatus OX=1061 GN=SAMN04244550_00764 PE=3 SV=1	0.439363	2.88498e-06
tr|Q3IY17|Q3IY17_RHOS4	1	DNA-binding protein HU, form N OS=Rhodobacter sphaeroides (strain ATCC 17023 / 2.4.1 / NCIB 8253 / DSM 158) OX=272943 GN=RSP_1388 PE=3 SV=1	3.16484	0.0171478
tr|A0A318TNI3|A0A318TNI3_9BRAD	2	DNA-binding protein HU-beta OS=Rhodopseudomonas faecalis OX=99655 GN=BJ122_101182 PE=3 SV=1	3.88138	1.75636e-06
tr|A0A418VE41|A0A418VE41_RHOPL	1	DNA-binding response regulator OS=Rhodopseudomonas palustris OX=1076 GN=D4Q52_12895 PE=4 SV=1	0.30223	0.0354327
tr|A0A3G6WJQ7|A0A3G6WJQ7_RHOSH	1	DNA-directed RNA polymerase subunit alpha OS=Rhodobacter sphaeroides OX=1063 GN=rpoA PE=3 SV=1	0.363069	0.0319661
tr|A0A318T985|A0A318T985_9BRAD	2	DNA-directed RNA polymerase subunit alpha OS=Rhodopseudomonas faecalis OX=99655 GN=rpoA PE=3 SV=1	3.43984	2.18863e-07
tr|E6VBY0|E6VBY0_RHOPX	1	DNA-directed RNA polymerase subunit alpha OS=Rhodopseudomonas palustris (strain DX-1) OX=652103 GN=rpoA PE=3 SV=1	1.9164	0.0304201
sp|Q7M8F7|RPOA_WOLSU	7	DNA-directed RNA polymerase subunit alpha OS=Wolinella succinogenes (strain ATCC 29543 / DSM 1740 / LMG 7466 / NCTC 11488 / FDC 602W) OX=273121 GN=rpoA PE=3 SV=1	0.461946	0.000269481
tr|A0A7H0XXH9|A0A7H0XXH9_RHOCA	3	DNA-directed RNA polymerase subunit beta OS=Rhodobacter capsulatus OX=1061 GN=rpoB PE=3 SV=1	0.344146	0.0030648
tr|A0A318TAF9|A0A318TAF9_9BRAD	16	DNA-directed RNA polymerase subunit beta OS=Rhodopseudomonas faecalis OX=99655 GN=rpoB PE=3 SV=1	1.90641	5.79382e-05
tr|A0A318TIJ5|A0A318TIJ5_9BRAD	12	DNA-directed RNA polymerase subunit beta' OS=Rhodopseudomonas faecalis OX=99655 GN=rpoC PE=3 SV=1	1.68964	2.10528e-05
tr|E6VBU2|E6VBU2_RHOPX	1	DNA-directed RNA polymerase subunit beta' OS=Rhodopseudomonas palustris (strain DX-1) OX=652103 GN=rpoC PE=3 SV=1	2.68503	0.000973961
tr|A0A318TIX4|A0A318TIX4_9BRAD	2	DNA-directed RNA polymerase subunit omega OS=Rhodopseudomonas faecalis OX=99655 GN=rpoZ PE=3 SV=1	2.50444	0.000513476
tr|A0A7H0Y055|A0A7H0Y055_RHOCA	1	DsbA family protein OS=Rhodobacter capsulatus OX=1061 GN=H9N28_06465 PE=4 SV=1	0.311836	0.000579345
tr|A0A318TCL3|A0A318TCL3_9BRAD	2	dTDP-4-amino-4,6-dideoxygalactose transaminase OS=Rhodopseudomonas faecalis OX=99655 GN=BJ122_12043 PE=3 SV=1	2.23229	0.0217562
tr|Q3HKP3|Q3HKP3_RHOS4	1	dTDP-4-dehydrorhamnose 3,5-epimerase OS=Rhodobacter sphaeroides (strain ATCC 17023 / 2.4.1 / NCIB 8253 / DSM 158) OX=272943 GN=rfbC PE=3 SV=1	0.563996	0.0190104
tr|A0A330HG17|A0A330HG17_9RHOB	2	DUF1013 domain-containing protein OS=Rhodobacter johrii OX=445629 GN=DDV93_08320 PE=4 SV=1	4.18378	0.00693123
tr|A0A318TKA6|A0A318TKA6_9BRAD	3	DUF2059 domain-containing protein OS=Rhodopseudomonas faecalis OX=99655 GN=BJ122_102300 PE=4 SV=1	2.20733	0.0261637
tr|A0A4Q0MT32|A0A4Q0MT32_9DELT	2	DUF4198 domain-containing protein OS=Desulfovibrio sp. DS-1 OX=2497683 GN=EKK70_12615 PE=4 SV=1	0.621684	0.00891722
tr|A0A7H0Y1H3|A0A7H0Y1H3_RHOCA	1	DUF4198 domain-containing protein OS=Rhodobacter capsulatus OX=1061 GN=H9N28_10975 PE=4 SV=1	3.01583	0.00340748
tr|A0A330H1P1|A0A330H1P1_9RHOB	1	DUF892 domain-containing protein OS=Rhodobacter johrii OX=445629 GN=DDV93_18645 PE=4 SV=1	2.29593	0.00338173
tr|A0A330HH60|A0A330HH60_9RHOB	2	D-xylose ABC transporter substrate-binding protein OS=Rhodobacter johrii OX=445629 GN=xylF PE=4 SV=1	1.75694	0.0136073
tr|A0A1G7ECU3|A0A1G7ECU3_RHOCA	6	D-xylose transport system substrate-binding protein OS=Rhodobacter capsulatus OX=1061 GN=SAMN04244550_00736 PE=4 SV=1	3.84016	0.00508837
tr|A0A318TEB0|A0A318TEB0_9BRAD	1	Effector-binding domain-containing protein OS=Rhodopseudomonas faecalis OX=99655 GN=BJ122_11452 PE=4 SV=1	1.61972	0.0241159
tr|A0A318T8U6|A0A318T8U6_9BRAD	3	Electron transfer flavoprotein alpha subunit apoprotein OS=Rhodopseudomonas faecalis OX=99655 GN=BJ122_12829 PE=3 SV=1	3.17014	2.97892e-07
tr|A0A318TGZ8|A0A318TGZ8_9BRAD	8	Electron transfer flavoprotein beta subunit OS=Rhodopseudomonas faecalis OX=99655 GN=BJ122_12828 PE=3 SV=1	2.30075	8.03296e-05
tr|A0A330H4M0|A0A330H4M0_9RHOB	2	Electron transfer flavoprotein subunit beta/FixA family protein OS=Rhodobacter johrii OX=445629 GN=DDV93_21525 PE=3 SV=1	1.30999	0.0413498
tr|A0A318TGV4|A0A318TGV4_9BRAD	2	Electron transfer flavoprotein-ubiquinone oxidoreductase OS=Rhodopseudomonas faecalis OX=99655 GN=BJ122_10479 PE=4 SV=1	1.60009	0.00742843
tr|A0A6G5QP98|A0A6G5QP98_CAMRE	1	Elongation factor G OS=Campylobacter rectus OX=203 GN=fusA PE=3 SV=1	0.464832	0.0449183
tr|A0A4Q0MW04|A0A4Q0MW04_9DELT	2	Elongation factor G OS=Desulfovibrio sp. DS-1 OX=2497683 GN=fusA PE=3 SV=1	2.05247	0.0419755
tr|A0A200J221|A0A200J221_9ENTE	1	Elongation factor G OS=Enterococcus sp. 9D6_DIV0238 OX=1834192 GN=fusA PE=3 SV=1	2.53724	0.000363104
tr|A0A7H0XXI4|A0A7H0XXI4_RHOCA	4	Elongation factor G OS=Rhodobacter capsulatus OX=1061 GN=fusA PE=3 SV=1	2.26269	0.00418911
tr|A0A1G7JXI9|A0A1G7JXI9_RHOCA	1	Elongation factor G OS=Rhodobacter capsulatus OX=1061 GN=SAMN04244550_01997 PE=3 SV=1	4.10981	0.00657988
tr|A0A3G6WK17|A0A3G6WK17_RHOSH	6	Elongation factor G OS=Rhodobacter sphaeroides OX=1063 GN=fusA PE=3 SV=1	1.42324	0.0207395
tr|A0A318TGQ5|A0A318TGQ5_9BRAD	6	Elongation factor G OS=Rhodopseudomonas faecalis OX=99655 GN=BJ122_13125 PE=3 SV=1	2.05193	3.05805e-05
tr|A0A318TPT2|A0A318TPT2_9BRAD	12	Elongation factor G OS=Rhodopseudomonas faecalis OX=99655 GN=fusA PE=3 SV=1	1.87412	0.000763777
tr|A0A2R4GWR8|A0A2R4GWR8_RHOPL	1	Elongation factor G OS=Rhodopseudomonas palustris OX=1076 GN=fusA PE=3 SV=1	6.88847	0.0192554
sp|Q7MA53|EFG_WOLSU	16	Elongation factor G OS=Wolinella succinogenes (strain ATCC 29543 / DSM 1740 / LMG 7466 / NCTC 11488 / FDC 602W) OX=273121 GN=fusA PE=3 SV=1	0.334524	0.000157257
tr|A0A318TEY1|A0A318TEY1_9BRAD	3	Elongation factor P OS=Rhodopseudomonas faecalis OX=99655 GN=efp PE=3 SV=1	2.34906	1.41226e-06
sp|Q7M904|EFP_WOLSU	3	Elongation factor P OS=Wolinella succinogenes (strain ATCC 29543 / DSM 1740 / LMG 7466 / NCTC 11488 / FDC 602W) OX=273121 GN=efp PE=3 SV=1	0.644261	0.015339
tr|A0A330H9H6|A0A330H9H6_9RHOB	2	Elongation factor Ts OS=Rhodobacter johrii OX=445629 GN=tsf PE=3 SV=1	2.14569	0.000336199
tr|A0A318TNL6|A0A318TNL6_9BRAD	7	Elongation factor Ts OS=Rhodopseudomonas faecalis OX=99655 GN=tsf PE=3 SV=1	2.11937	0.000712844
sp|Q7MAK1|EFTS_WOLSU	3	Elongation factor Ts OS=Wolinella succinogenes (strain ATCC 29543 / DSM 1740 / LMG 7466 / NCTC 11488 / FDC 602W) OX=273121 GN=tsf PE=3 SV=1	0.212267	2.4868e-05
sp|C6C171|EFTU_DESAD	1	Elongation factor Tu OS=Desulfovibrio salexigens (strain ATCC 14822 / DSM 2638 / NCIB 8403 / VKM B-1763) OX=526222 GN=tuf PE=3 SV=1	0.182159	0.00477121
tr|A0A4Q0MSF6|A0A4Q0MSF6_9DELT	5	Elongation factor Tu OS=Desulfovibrio sp. DS-1 OX=2497683 GN=tuf PE=3 SV=1	0.599087	0.00075713
tr|R2RUG5|R2RUG5_9ENTE	3	Elongation factor Tu OS=Enterococcus raffinosus ATCC 49464 OX=1158602 GN=tuf PE=3 SV=1	0.567709	0.014846
tr|A0A173UAH1|A0A173UAH1_9BACT	1	Elongation factor Tu OS=Parabacteroides distasonis OX=823 GN=tuf PE=3 SV=1	0.330287	0.015141
tr|A0A7H0XX47|A0A7H0XX47_RHOCA	6	Elongation factor Tu OS=Rhodobacter capsulatus OX=1061 GN=tuf PE=3 SV=1	2.68063	0.00752054
tr|B9KL89|B9KL89_RHOSK	4	Elongation factor Tu OS=Rhodobacter sphaeroides (strain KD131 / KCTC 12085) OX=557760 GN=tuf PE=3 SV=1	5.83689	0.000664616
tr|A0A318TPV2|A0A318TPV2_9BRAD	6	Elongation factor Tu OS=Rhodopseudomonas faecalis OX=99655 GN=tuf PE=3 SV=1	3.03064	6.53358e-06
tr|E6VBT0|E6VBT0_RHOPX	2	Elongation factor Tu OS=Rhodopseudomonas palustris (strain DX-1) OX=652103 GN=tuf PE=3 SV=1	7.1927	0.00149637
tr|A0A4R2F7E0|A0A4R2F7E0_9GAMM	1	Elongation factor Tu OS=Shewanella fodinae OX=552357 GN=tuf PE=3 SV=1	3.20967	9.77649e-05
sp|P42482|EFTU_WOLSU	17	Elongation factor Tu OS=Wolinella succinogenes (strain ATCC 29543 / DSM 1740 / LMG 7466 / NCTC 11488 / FDC 602W) OX=273121 GN=tuf PE=3 SV=2	0.486028	0.00371319
tr|A0A318THF6|A0A318THF6_9BRAD	1	Enamine deaminase RidA (YjgF/YER057c/UK114 family) OS=Rhodopseudomonas faecalis OX=99655 GN=BJ122_10761 PE=4 SV=1	0.528785	0.0214466
tr|A0A3D1UAV7|A0A3D1UAV7_9DELT	1	Enolase OS=Desulfovibrio sp. OX=885 GN=eno PE=3 SV=1	4.02912	0.0105637
tr|A0A679ID81|A0A679ID81_9ENTE	4	Enolase OS=Enterococcus saigonensis OX=1805431 GN=eno PE=3 SV=1	0.453798	0.0297908
tr|A0A510WA87|A0A510WA87_ENTTH	1	Enolase OS=Enterococcus thailandicus OX=417368 GN=eno PE=3 SV=1	0.130778	0.00562324
tr|A0A318TM06|A0A318TM06_9BRAD	2	Enolase OS=Rhodopseudomonas faecalis OX=99655 GN=eno PE=3 SV=1	2.74506	4.35477e-06
sp|Q07ND9|ENO_RHOP5	1	Enolase OS=Rhodopseudomonas palustris (strain BisA53) OX=316055 GN=eno PE=3 SV=1	2.90217	0.000131344
tr|A0A6L5NSN4|A0A6L5NSN4_9GAMM	1	Enolase OS=Shewanella sp. XMDDZSB0408 OX=2664453 GN=eno PE=3 SV=1	2.82696	0.00820538
tr|A0A318U0E2|A0A318U0E2_9BRAD	1	Enoyl-CoA hydratase OS=Rhodopseudomonas faecalis OX=99655 GN=BJ122_101118 PE=4 SV=1	0.457665	0.0466404
tr|A0A318TLU6|A0A318TLU6_9BRAD	1	Enoyl-CoA hydratase OS=Rhodopseudomonas faecalis OX=99655 GN=BJ122_10262 PE=3 SV=1	2.09156	0.0181948
tr|Q07QY2|Q07QY2_RHOP5	1	Enoyl-CoA hydratase OS=Rhodopseudomonas palustris (strain BisA53) OX=316055 GN=RPE_1703 PE=3 SV=1	2.2421	0.0035795
tr|A0A0Q0VIF7|A0A0Q0VIF7_RHOCA	2	Erythritol transport system substrate-binding protein OS=Rhodobacter capsulatus OX=1061 GN=SAMN04244550_02480 PE=4 SV=1	2.82739	0.000172064
tr|B8DNY4|B8DNY4_DESVM	1	Extracellular solute-binding protein family 3 OS=Desulfovibrio vulgaris (strain Miyazaki F / DSM 19637) OX=883 GN=DvMF_0860 PE=4 SV=1	0.54385	0.0273276
tr|B8DNE6|B8DNE6_DESVM	1	Extracellular solute-binding protein family 3 OS=Desulfovibrio vulgaris (strain Miyazaki F / DSM 19637) OX=883 GN=DvMF_3152 PE=3 SV=1	0.38849	0.0138399
tr|F3LTX3|F3LTX3_9BURK	1	Extracellular solute-binding protein OS=Rubrivivax benzoatilyticus JA2 = ATCC BAA-35 OX=987059 GN=RBXJA2T_15748 PE=4 SV=1	2.18016	0.0016045
tr|Q7MAA4|Q7MAA4_WOLSU	2	EXTRACELLULAR SOLUTE-BINDING PROTEIN, PUTATIVE OS=Wolinella succinogenes (strain ATCC 29543 / DSM 1740 / LMG 7466 / NCTC 11488 / FDC 602W) OX=273121 GN=WS0373 PE=3 SV=1	0.679021	0.0379281
tr|B8DMG2|B8DMG2_DESVM	3	FAD linked oxidase domain protein OS=Desulfovibrio vulgaris (strain Miyazaki F / DSM 19637) OX=883 GN=DvMF_1862 PE=4 SV=1	0.38995	0.00405858
tr|A0A242A416|A0A242A416_9ENTE	1	FAD_binding_2 domain-containing protein OS=Enterococcus sp. 8G7_MSG3316 OX=1834191 GN=A5886_000852 PE=3 SV=1	0.135927	0.00644725
tr|A0A318TI42|A0A318TI42_9BRAD	2	Farnesyl-diphosphate synthase OS=Rhodopseudomonas faecalis OX=99655 GN=BJ122_12145 PE=3 SV=1	2.34828	0.0235686
tr|A0A318TSQ0|A0A318TSQ0_9BRAD	1	Ferritin-like metal-binding protein YciE OS=Rhodopseudomonas faecalis OX=99655 GN=BJ122_102100 PE=4 SV=1	4.24853	1.98592e-06
tr|A0A318TPC7|A0A318TPC7_9BRAD	2	Fe-S cluster biogenesis protein NfuA OS=Rhodopseudomonas faecalis OX=99655 GN=BJ122_12119 PE=4 SV=1	2.42484	1.20641e-05
tr|A0A318T9A3|A0A318T9A3_9BRAD	1	Fis family two component transcriptional regulator OS=Rhodopseudomonas faecalis OX=99655 GN=BJ122_12457 PE=4 SV=1	4.47585	1.10494e-07
tr|Q7M8B3|Q7M8B3_WOLSU	1	Flagellar hook protein FlgE OS=Wolinella succinogenes (strain ATCC 29543 / DSM 1740 / LMG 7466 / NCTC 11488 / FDC 602W) OX=273121 GN=FLGE PE=3 SV=1	0.452286	0.0107965
tr|A0A418VKE1|A0A418VKE1_RHOPL	1	Flagellin OS=Rhodopseudomonas palustris OX=1076 GN=D4Q52_05540 PE=3 SV=1	3.02166	0.0143295
tr|F3LSR5|F3LSR5_9BURK	1	Flagellin OS=Rubrivivax benzoatilyticus JA2 = ATCC BAA-35 OX=987059 GN=RBXJA2T_13684 PE=3 SV=1	0.521408	0.0368322
tr|A0A4R2FGP0|A0A4R2FGP0_9GAMM	1	Flagellin OS=Shewanella fodinae OX=552357 GN=EDC91_10850 PE=3 SV=1	1.61622	0.000277516
tr|Q79HP6|Q79HP6_WOLSU	22	Flagellin OS=Wolinella succinogenes (strain ATCC 29543 / DSM 1740 / LMG 7466 / NCTC 11488 / FDC 602W) OX=273121 GN=FLAG PE=3 SV=1	0.365442	0.00290889
tr|A0A318TEC1|A0A318TEC1_9BRAD	8	Flagellin-like hook-associated protein FlgL (Fragment) OS=Rhodopseudomonas faecalis OX=99655 GN=BJ122_1201 PE=4 SV=1	1.75298	0.000519631
tr|F0ENX0|F0ENX0_ENTCA	1	Flavin reductase OS=Enterococcus casseliflavus ATCC 12755 OX=888066 GN=HMPREF9087_3112 PE=4 SV=1	0.138988	0.00993687
tr|Q7MAP0|Q7MAP0_WOLSU	13	FLAVOCYTOCHROME C FLAVIN SUBUNIT OS=Wolinella succinogenes (strain ATCC 29543 / DSM 1740 / LMG 7466 / NCTC 11488 / FDC 602W) OX=273121 GN=FCCA PE=3 SV=1	1.91014	0.0227542
tr|A0A679IRP9|A0A679IRP9_9ENTE	1	Formate acetyltransferase OS=Enterococcus saigonensis OX=1805431 GN=pflB_2 PE=3 SV=1	0.198538	0.00607283
tr|Q21AE2|Q21AE2_RHOPB	1	Formate C-acetyltransferase OS=Rhodopseudomonas palustris (strain BisB18) OX=316056 GN=RPC_1080 PE=3 SV=1	2.25862	0.038836
sp|P27273|FDHB_WOLSU	4	Formate dehydrogenase iron-sulfur subunit OS=Wolinella succinogenes (strain ATCC 29543 / DSM 1740 / LMG 7466 / NCTC 11488 / FDC 602W) OX=273121 GN=fdhB1 PE=1 SV=1	0.166428	0.000248553
tr|Q7M7L0|Q7M7L0_WOLSU	16	FORMATE DEHYDROGENASE OS=Wolinella succinogenes (strain ATCC 29543 / DSM 1740 / LMG 7466 / NCTC 11488 / FDC 602W) OX=273121 GN=FDHA PE=4 SV=2	0.368015	0.000144283
sp|Q7M8I0|PURT_WOLSU	1	Formate-dependent phosphoribosylglycinamide formyltransferase OS=Wolinella succinogenes (strain ATCC 29543 / DSM 1740 / LMG 7466 / NCTC 11488 / FDC 602W) OX=273121 GN=purT PE=3 SV=1	0.230018	0.000113245
tr|T0VJR3|T0VJR3_9ENTE	1	Formate--tetrahydrofolate ligase OS=Enterococcus sp. HSIEG1 OX=1316414 GN=fhs PE=3 SV=1	0.192597	4.66835e-06
tr|Q3J0V6|Q3J0V6_RHOS4	1	Fructose-1,6-bisphosphatase OS=Rhodobacter sphaeroides (strain ATCC 17023 / 2.4.1 / NCIB 8253 / DSM 158) OX=272943 GN=RSP_0404 PE=3 SV=1	1.88986	0.0240617
tr|A0A318TV31|A0A318TV31_9BRAD	2	Fructose-1,6-bisphosphatase OS=Rhodopseudomonas faecalis OX=99655 GN=BJ122_10630 PE=3 SV=1	2.81855	0.000293445
tr|Q3IX56|Q3IX56_RHOS4	1	Fructose-1,6-bisphosphate aldolase OS=Rhodobacter sphaeroides (strain ATCC 17023 / 2.4.1 / NCIB 8253 / DSM 158) OX=272943 GN=cfxB PE=3 SV=1	0.384854	0.0113214
tr|E6VEW1|E6VEW1_RHOPX	1	Fructose-1,6-bisphosphate aldolase OS=Rhodopseudomonas palustris (strain DX-1) OX=652103 GN=Rpdx1_4820 PE=3 SV=1	0.391235	0.0166752
tr|Q3J3I7|Q3J3I7_RHOS4	3	Fructose-bisphosphate aldolase OS=Rhodobacter sphaeroides (strain ATCC 17023 / 2.4.1 / NCIB 8253 / DSM 158) OX=272943 GN=fbaB PE=4 SV=1	3.92208	0.000151024
tr|Q7M903|Q7M903_WOLSU	4	FRUCTOSE-BISPHOSPHATE ALDOLASE OS=Wolinella succinogenes (strain ATCC 29543 / DSM 1740 / LMG 7466 / NCTC 11488 / FDC 602W) OX=273121 GN=WS1280 PE=4 SV=1	0.492476	0.0157622
tr|Q9ZEP0|Q9ZEP0_WOLSC	7	Fumarate hydratase B, alpha subunit OS=Wolinella succinogenes OX=844 GN=fumB alpha PE=3 SV=1	0.336759	0.00277481
tr|Q9ZEN9|Q9ZEN9_WOLSC	3	Fumarate hydratase B, beta subunit OS=Wolinella succinogenes OX=844 GN=fumB beta PE=3 SV=1	0.291582	0.000271139
tr|A0A318T8V3|A0A318T8V3_9BRAD	1	Fumarate hydratase class I OS=Rhodopseudomonas faecalis OX=99655 GN=BJ122_12737 PE=3 SV=1	2.10079	0.0280776
sp|P17413|FRDC_WOLSU	1	Fumarate reductase cytochrome b subunit OS=Wolinella succinogenes (strain ATCC 29543 / DSM 1740 / LMG 7466 / NCTC 11488 / FDC 602W) OX=273121 GN=frdC PE=1 SV=1	0.255654	0.00880864
sp|P17412|FRDA_WOLSU	11	Fumarate reductase flavoprotein subunit OS=Wolinella succinogenes (strain ATCC 29543 / DSM 1740 / LMG 7466 / NCTC 11488 / FDC 602W) OX=273121 GN=frdA PE=1 SV=3	0.425409	0.000374963
sp|P17596|FRDB_WOLSU	8	Fumarate reductase iron-sulfur subunit OS=Wolinella succinogenes (strain ATCC 29543 / DSM 1740 / LMG 7466 / NCTC 11488 / FDC 602W) OX=273121 GN=frdB PE=1 SV=1	0.337529	0.000411356
tr|G2H8V8|G2H8V8_9DELT	1	GlnH OS=Desulfovibrio sp. A2 OX=298701 GN=glnH PE=3 SV=1	0.500149	0.036467
tr|A0A679I8U6|A0A679I8U6_9ENTE	1	Glucose-1-phosphate adenylyltransferase OS=Enterococcus saigonensis OX=1805431 GN=glgC_2 PE=3 SV=1	0.536209	0.0158726
tr|A0A318TIG4|A0A318TIG4_9BRAD	5	Glutamate dehydrogenase OS=Rhodopseudomonas faecalis OX=99655 GN=BJ122_103181 PE=3 SV=1	1.54739	0.0133431
tr|Q7M823|Q7M823_WOLSU	2	Glutamate dehydrogenase OS=Wolinella succinogenes (strain ATCC 29543 / DSM 1740 / LMG 7466 / NCTC 11488 / FDC 602W) OX=273121 GN=gdhA PE=3 SV=1	0.439695	0.00195882
tr|A0A318TLG0|A0A318TLG0_9BRAD	1	Glutamate--tRNA ligase OS=Rhodopseudomonas faecalis OX=99655 GN=gltX PE=3 SV=1	0.428014	0.0159044
tr|E6LHG5|E6LHG5_ENTI1	1	Glutamine synthetase OS=Enterococcus italicus (strain DSM 15952 / LMG 22039 / TP 1.5) OX=888064 GN=glnA PE=3 SV=1	0.0621158	0.000960522
tr|A0A0Q0QM51|A0A0Q0QM51_RHOCA	1	Glutamine synthetase OS=Rhodobacter capsulatus OX=1061 GN=SAMN04244550_01569 PE=3 SV=1	2.48849	0.0473595
tr|A0A318TNH2|A0A318TNH2_9BRAD	8	Glutamine synthetase OS=Rhodopseudomonas faecalis OX=99655 GN=BJ122_101170 PE=3 SV=1	2.02234	0.000704832
tr|Q7M7R9|Q7M7R9_WOLSU	8	GLUTAMINE SYNTHETASE OS=Wolinella succinogenes (strain ATCC 29543 / DSM 1740 / LMG 7466 / NCTC 11488 / FDC 602W) OX=273121 GN=GLNA PE=3 SV=1	0.473923	0.00358291
tr|Q3J3H1|Q3J3H1_RHOS4	1	Glutamine--fructose-6-phosphate aminotransferase [isomerizing] OS=Rhodobacter sphaeroides (strain ATCC 17023 / 2.4.1 / NCIB 8253 / DSM 158) OX=272943 GN=glmS PE=3 SV=1	0.268308	0.000571023
tr|Q3IYQ4|Q3IYQ4_RHOS4	1	Glutamine-pyruvate aminotransferase OS=Rhodobacter sphaeroides (strain ATCC 17023 / 2.4.1 / NCIB 8253 / DSM 158) OX=272943 GN=gltB PE=3 SV=1	3.96862	0.00163132
tr|A0A2T4JIH2|A0A2T4JIH2_9RHOB	1	Glutamyl-tRNA(Gln) amidotransferase subunit A OS=Rhodobacter veldkampii DSM 11550 OX=1185920 GN=gatA PE=3 SV=1	2.07794	0.0217208
tr|A0A318THS6|A0A318THS6_9BRAD	1	Glutamyl-tRNA(Gln) amidotransferase subunit A OS=Rhodopseudomonas faecalis OX=99655 GN=gatA PE=3 SV=1	0.429211	0.034738
tr|Q3J271|Q3J271_RHOS4	2	Glutaredoxin OS=Rhodobacter sphaeroides (strain ATCC 17023 / 2.4.1 / NCIB 8253 / DSM 158) OX=272943 GN=RSP_2953 PE=3 SV=1	0.573152	0.0272471
tr|A0A318T6L8|A0A318T6L8_9BRAD	3	Glutaredoxin OS=Rhodopseudomonas faecalis OX=99655 GN=BJ122_1393 PE=3 SV=1	1.97123	0.00725581
tr|A0A330HB80|A0A330HB80_9RHOB	1	Glutathione-dependent disulfide-bond oxidoreductase OS=Rhodobacter johrii OX=445629 GN=DDV93_12060 PE=4 SV=1	3.2597	9.20559e-06
tr|A0A318TJG3|A0A318TJG3_9BRAD	2	Glutathione-dependent peroxiredoxin OS=Rhodopseudomonas faecalis OX=99655 GN=BJ122_11534 PE=3 SV=1	1.79609	0.00765063
tr|Q6N1Y4|Q6N1Y4_RHOPA	1	Glutathione-dependent peroxiredoxin OS=Rhodopseudomonas palustris (strain ATCC BAA-98 / CGA009) OX=258594 GN=RPA4268 PE=3 SV=1	2.13697	0.0110935
tr|A0A519F3Z7|A0A519F3Z7_9BURK	1	Glyceraldehyde-3-phosphate dehydrogenase (Fragment) OS=Rubrivivax sp. OX=50259 GN=gap PE=3 SV=1	2.59924	5.56187e-06
tr|A0A318TGE8|A0A318TGE8_9BRAD	5	Glyceraldehyde-3-phosphate dehydrogenase (NAD+) OS=Rhodopseudomonas faecalis OX=99655 GN=BJ122_10968 PE=3 SV=1	3.10287	3.48486e-05
tr|A0A1T4WVK5|A0A1T4WVK5_9DELT	1	Glyceraldehyde-3-phosphate dehydrogenase OS=Desulfovibrio gracilis DSM 16080 OX=1121449 GN=SAMN02745704_01384 PE=3 SV=1	0.1744	0.00034129
tr|A0A1L8QVJ0|A0A1L8QVJ0_9ENTE	2	Glyceraldehyde-3-phosphate dehydrogenase OS=Enterococcus aquimarinus OX=328396 GN=RU93_GL001507 PE=3 SV=1	0.285846	0.00639661
tr|R2S5I5|R2S5I5_9ENTE	1	Glyceraldehyde-3-phosphate dehydrogenase OS=Enterococcus asini ATCC 700915 OX=1158606 GN=UAS_00502 PE=3 SV=1	0.12435	0.0229689
tr|V7ZPK3|V7ZPK3_ENTFL	1	Glyceraldehyde-3-phosphate dehydrogenase OS=Enterococcus faecalis PF3 OX=1410655 GN=T481_10630 PE=3 SV=1	0.107751	0.00543463
tr|A0A330H595|A0A330H595_9RHOB	1	Glyceraldehyde-3-phosphate dehydrogenase OS=Rhodobacter johrii OX=445629 GN=gap PE=3 SV=1	2.02395	0.0130804
tr|Q7M9C4|Q7M9C4_WOLSU	1	Glyceraldehyde-3-phosphate dehydrogenase OS=Wolinella succinogenes (strain ATCC 29543 / DSM 1740 / LMG 7466 / NCTC 11488 / FDC 602W) OX=273121 GN=GAP_2 PE=3 SV=1	0.434822	0.00122273
tr|A0A318TDR2|A0A318TDR2_9BRAD	3	Glycogen operon protein OS=Rhodopseudomonas faecalis OX=99655 GN=BJ122_11070 PE=3 SV=1	1.59002	0.0331712
tr|D5ASA5|D5ASA5_RHOCB	1	Glyoxalase/bleomycin resistance protein/dioxygenase OS=Rhodobacter capsulatus (strain ATCC BAA-309 / NBRC 16581 / SB1003) OX=272942 GN=RCAP_rcc01239 PE=4 SV=1	0.461462	0.0467767
tr|A0A318TRQ1|A0A318TRQ1_9BRAD	1	GMP synthase [glutamine-hydrolyzing] OS=Rhodopseudomonas faecalis OX=99655 GN=guaA PE=3 SV=1	1.23208	0.0263191
tr|A3PIN0|A3PIN0_RHOS1	1	Helicase domain protein OS=Rhodobacter sphaeroides (strain ATCC 17029 / ATH 2.4.9) OX=349101 GN=Rsph17029_1086 PE=4 SV=1	2.55288	0.000599924
tr|A0A318THF0|A0A318THF0_9BRAD	2	Hemerythrin-like domain-containing protein OS=Rhodopseudomonas faecalis OX=99655 GN=BJ122_11116 PE=4 SV=1	2.16079	2.59316e-05
tr|A0A318TQ80|A0A318TQ80_9BRAD	1	Hemolysin-activating ACP:hemolysin acyltransferase OS=Rhodopseudomonas faecalis OX=99655 GN=BJ122_11722 PE=3 SV=1	1.7272	0.0202355
tr|A0A0N8VFD2|A0A0N8VFD2_RHOCA	1	HemY protein OS=Rhodobacter capsulatus OX=1061 GN=SAMN04244550_00697 PE=4 SV=1	0.457119	0.00335338
tr|A0A318TFC6|A0A318TFC6_9BRAD	1	HemY protein OS=Rhodopseudomonas faecalis OX=99655 GN=BJ122_11620 PE=4 SV=1	0.159999	0.00462139
tr|G2H8S1|G2H8S1_9DELT	1	HesB/YadR/YfhF-family protein OS=Desulfovibrio sp. A2 OX=298701 GN=DA2_2165 PE=4 SV=1	2.51823	0.0329167
tr|A0A7J0BI14|A0A7J0BI14_9DELT	1	Heterodisulfide reductase subunit A OS=Desulfovibrio sp. HN2 OX=2718620 GN=DSM101010T_12170 PE=4 SV=1	0.335761	0.012186
tr|S7TJM2|S7TJM2_9DELT	1	Histidine kinase OS=Desulfovibrio sp. X2 OX=941449 GN=dsx2_0733 PE=4 SV=1	2.37847	0.00146148
tr|B8DQ68|B8DQ68_DESVM	1	Histidine kinase OS=Desulfovibrio vulgaris (strain Miyazaki F / DSM 19637) OX=883 GN=DvMF_1989 PE=4 SV=1	1.93681	0.0036757
tr|Q7M7U3|Q7M7U3_WOLSU	3	Histidine kinase OS=Wolinella succinogenes (strain ATCC 29543 / DSM 1740 / LMG 7466 / NCTC 11488 / FDC 602W) OX=273121 GN=CHEA PE=4 SV=1	0.422268	0.00386394
tr|A0A330H2S2|A0A330H2S2_9RHOB	4	H-NS histone family protein OS=Rhodobacter johrii OX=445629 GN=DDV93_18080 PE=3 SV=1	2.32444	0.01801
tr|A0A7H0XW65|A0A7H0XW65_RHOCA	2	Homocysteine S-methyltransferase family protein OS=Rhodobacter capsulatus OX=1061 GN=H9N28_16270 PE=4 SV=1	0.597536	0.0286067
tr|A0A318TEL2|A0A318TEL2_9BRAD	2	Homospermidine synthase OS=Rhodopseudomonas faecalis OX=99655 GN=BJ122_109125 PE=4 SV=1	1.87135	0.0158859
tr|R2T7X3|R2T7X3_9ENTE	1	HTH merR-type domain-containing protein OS=Enterococcus pallens ATCC BAA-351 OX=1158607 GN=UAU_00994 PE=4 SV=1	0.517177	0.0104597
tr|A0A658KYJ5|A0A658KYJ5_9GAMM	1	HU family DNA-binding protein OS=Shewanella vesiculosa OX=518738 GN=EGC79_09085 PE=3 SV=1	0.20824	0.00362235
tr|D5AUJ0|D5AUJ0_RHOCB	1	Hydrolase, alpha/beta fold family OS=Rhodobacter capsulatus (strain ATCC BAA-309 / NBRC 16581 / SB1003) OX=272942 GN=RCAP_rcc01884 PE=4 SV=1	0.295996	0.0162253
tr|A0A0E0T1S6|A0A0E0T1S6_DESVR	6	Hydroxylamine reductase OS=Desulfovibrio vulgaris (strain RCH1) OX=573059 GN=hcp PE=3 SV=1	0.514338	0.000287266
tr|A0A318TFY1|A0A318TFY1_9BRAD	4	Hydroxymethylbilane synthase OS=Rhodopseudomonas faecalis OX=99655 GN=BJ122_11094 PE=3 SV=1	1.60645	0.00510438
tr|A0A318TL71|A0A318TL71_9BRAD	1	IclR family transcriptional regulator OS=Rhodopseudomonas faecalis OX=99655 GN=BJ122_111105 PE=4 SV=1	3.61464	0.0102867
tr|Q7M9Q9|Q7M9Q9_WOLSU	2	IMMUNOGENIC PROTEIN OS=Wolinella succinogenes (strain ATCC 29543 / DSM 1740 / LMG 7466 / NCTC 11488 / FDC 602W) OX=273121 GN=WS0748 PE=4 SV=1	0.381175	0.0373101
tr|Q7M9S3|Q7M9S3_WOLSU	3	Indolepyruvate oxidoreductase subunit IorA OS=Wolinella succinogenes (strain ATCC 29543 / DSM 1740 / LMG 7466 / NCTC 11488 / FDC 602W) OX=273121 GN=WS0714 PE=4 SV=1	0.638295	0.00327629
tr|A0A318TUS8|A0A318TUS8_9BRAD	3	Inosine-5'-monophosphate dehydrogenase OS=Rhodopseudomonas faecalis OX=99655 GN=guaB PE=3 SV=1	2.98259	8.76414e-06
tr|Q7M843|Q7M843_WOLSU	5	Inosine-5'-monophosphate dehydrogenase OS=Wolinella succinogenes (strain ATCC 29543 / DSM 1740 / LMG 7466 / NCTC 11488 / FDC 602W) OX=273121 GN=GUAB PE=3 SV=1	0.473368	0.0173225
tr|A0A318TD85|A0A318TD85_9BRAD	2	Inositol-1-monophosphatase OS=Rhodopseudomonas faecalis OX=99655 GN=BJ122_10963 PE=3 SV=1	3.43538	4.02362e-07
tr|A0A318TL44|A0A318TL44_9BRAD	2	Integration host factor subunit alpha OS=Rhodopseudomonas faecalis OX=99655 GN=ihfA PE=3 SV=1	1.43137	0.0252292
tr|A0A318TGY2|A0A318TGY2_9BRAD	1	Invasion protein IalB OS=Rhodopseudomonas faecalis OX=99655 GN=BJ122_10530 PE=4 SV=1	5.36408	0.000312972
tr|A0A2T5JKA4|A0A2T5JKA4_9RHOB	3	Iron complex transport system substrate-binding protein OS=Rhodobacter azotoformans OX=43057 GN=C8J28_1442 PE=4 SV=1	5.83072	8.54921e-05
tr|B8DJN1|B8DJN1_DESVM	1	Iron-sulfur cluster binding protein OS=Desulfovibrio vulgaris (strain Miyazaki F / DSM 19637) OX=883 GN=DvMF_0396 PE=4 SV=1	0.502079	0.0128316
tr|Q7M817|Q7M817_WOLSU	2	Iron-sulfur cluster carrier protein OS=Wolinella succinogenes (strain ATCC 29543 / DSM 1740 / LMG 7466 / NCTC 11488 / FDC 602W) OX=273121 GN=MRP PE=3 SV=1	0.244196	0.00496033
tr|A0A318TB01|A0A318TB01_9BRAD	10	Isocitrase OS=Rhodopseudomonas faecalis OX=99655 GN=BJ122_13313 PE=4 SV=1	2.93709	7.2387e-07
tr|Q218P8|Q218P8_RHOPB	1	Isocitrate dehydrogenase [NADP] OS=Rhodopseudomonas palustris (strain BisB18) OX=316056 GN=RPC_1576 PE=3 SV=1	3.25044	0.000329126
tr|A0A318TWL5|A0A318TWL5_9BRAD	1	Isoleucine--tRNA ligase OS=Rhodopseudomonas faecalis OX=99655 GN=ileS PE=3 SV=1	2.25379	0.0228335
tr|A0A318TFU3|A0A318TFU3_9BRAD	2	K(+)-insensitive pyrophosphate-energized proton pump OS=Rhodopseudomonas faecalis OX=99655 GN=hppA PE=3 SV=1	1.67367	0.00868714
tr|A0A318THL9|A0A318THL9_9BRAD	3	Ketol-acid reductoisomerase (NADP(+)) OS=Rhodopseudomonas faecalis OX=99655 GN=ilvC PE=3 SV=1	4.03783	4.81655e-07
sp|Q7M851|ILVC_WOLSU	5	Ketol-acid reductoisomerase (NADP(+)) OS=Wolinella succinogenes (strain ATCC 29543 / DSM 1740 / LMG 7466 / NCTC 11488 / FDC 602W) OX=273121 GN=ilvC PE=3 SV=1	0.424495	0.000111015
tr|Q7MSU0|Q7MSU0_WOLSU	5	Lar_N domain-containing protein OS=Wolinella succinogenes (strain ATCC 29543 / DSM 1740 / LMG 7466 / NCTC 11488 / FDC 602W) OX=273121 GN=WS0140 PE=4 SV=1	0.621692	0.0107505
tr|T0VCY2|T0VCY2_9ENTE	1	L-arabinose-binding periplasmic proteinprecursorAraF OS=Enterococcus sp. HSIEG1 OX=1316414 GN=HSIEG1_2076 PE=4 SV=1	5.48951	0.00290089
sp|P50286|ASPG_WOLSU	5	L-asparaginase OS=Wolinella succinogenes (strain ATCC 29543 / DSM 1740 / LMG 7466 / NCTC 11488 / FDC 602W) OX=273121 GN=ansA PE=1 SV=2	0.245516	2.49551e-05
tr|A0A318TH77|A0A318TH77_9BRAD	1	Light-harvesting protein B-800-850 alpha chain OS=Rhodopseudomonas faecalis OX=99655 GN=BJ122_104191 PE=4 SV=1	2.86875	0.0134022
tr|A0A318U0V8|A0A318U0V8_9BRAD	1	Light-harvesting protein B-800-850 beta chain OS=Rhodopseudomonas faecalis OX=99655 GN=BJ122_101292 PE=3 SV=1	2.1557	0.0400525
tr|A0A318TI96|A0A318TI96_9BRAD	3	Light-independent protochlorophyllide reductase iron-sulfur ATP-binding protein OS=Rhodopseudomonas faecalis OX=99655 GN=bchL PE=3 SV=1	1.91736	0.00699964
tr|Q7MSM9|Q7MSM9_WOLSU	11	LINOCIN M18 OS=Wolinella succinogenes (strain ATCC 29543 / DSM 1740 / LMG 7466 / NCTC 11488 / FDC 602W) OX=273121 GN=WS0287 PE=4 SV=1	0.362119	0.00322554
tr|A0A318TNG9|A0A318TNG9_9BRAD	8	Lon protease OS=Rhodopseudomonas faecalis OX=99655 GN=lon PE=2 SV=1	1.35577	0.0343982
tr|A0A318T827|A0A318T827_9BRAD	2	Long-chain acyl-CoA synthetase OS=Rhodopseudomonas faecalis OX=99655 GN=BJ122_1379 PE=4 SV=1	2.10047	0.0422733
tr|Q7M8N4|Q7M8N4_WOLSU	11	L-TARTRATE DEHYDRATASE, SUBUNIT A OS=Wolinella succinogenes (strain ATCC 29543 / DSM 1740 / LMG 7466 / NCTC 11488 / FDC 602W) OX=273121 GN=WS1530 PE=3 SV=1	0.351997	6.3201e-05
tr|Q7M8N5|Q7M8N5_WOLSU	6	L-TARTRATE DEHYDRATASE, SUBUNIT B OS=Wolinella succinogenes (strain ATCC 29543 / DSM 1740 / LMG 7466 / NCTC 11488 / FDC 602W) OX=273121 GN=accA PE=3 SV=1	0.241331	0.0313286
tr|A0A3D1U6V0|A0A3D1U6V0_9DELT	1	L-threonine dehydrogenase OS=Desulfovibrio sp. OX=885 GN=DEV75_01900 PE=4 SV=1	3.15534	0.00107788
tr|A0A318TTT4|A0A318TTT4_9BRAD	1	LTXXQ motif family protein OS=Rhodopseudomonas faecalis OX=99655 GN=BJ122_10111 PE=3 SV=1	0.616929	0.0160586
tr|A0A318TFT7|A0A318TFT7_9BRAD	1	Malate dehydrogenase (Oxaloacetate-decarboxylating)(NADP+) OS=Rhodopseudomonas faecalis OX=99655 GN=BJ122_107147 PE=3 SV=1	0.117771	0.000431787
tr|A0A4V5PP73|A0A4V5PP73_RHOCA	2	Malate dehydrogenase OS=Rhodobacter capsulatus OX=1061 GN=mdh PE=3 SV=1	3.25169	0.00947246
tr|A0A3G6W7R8|A0A3G6W7R8_RHOSH	1	Malate dehydrogenase OS=Rhodobacter sphaeroides OX=1063 GN=mdh PE=3 SV=1	2.73942	0.00821441
tr|A0A318TJR8|A0A318TJR8_9BRAD	4	Malate dehydrogenase OS=Rhodopseudomonas faecalis OX=99655 GN=mdh PE=3 SV=1	2.5468	0.000381751
tr|R2XWP7|R2XWP7_9ENTE	3	Malate dehydrogenase, decarboxylating OS=Enterococcus gilvus ATCC BAA-350 OX=1158614 GN=UKC_00139 PE=3 SV=1	0.258132	0.00679351
tr|A0A318TAB1|A0A318TAB1_9BRAD	4	Malate synthase G OS=Rhodopseudomonas faecalis OX=99655 GN=glcB PE=3 SV=1	2.32802	1.84261e-05
tr|A0A1G7PCR9|A0A1G7PCR9_RHOCA	1	Malate synthase OS=Rhodobacter capsulatus OX=1061 GN=SAMN04244550_02939 PE=3 SV=1	0.297489	0.00155937
tr|Q7MAL2|Q7MAL2_WOLSU	7	MALIC ENZYME OS=Wolinella succinogenes (strain ATCC 29543 / DSM 1740 / LMG 7466 / NCTC 11488 / FDC 602W) OX=273121 GN=WS0171 PE=3 SV=1	0.480918	7.4051e-05
tr|A0A7H0Y0T8|A0A7H0Y0T8_RHOCA	1	Malonyl CoA-acyl carrier protein transacylase OS=Rhodobacter capsulatus OX=1061 GN=fabD PE=3 SV=1	0.381507	0.016824
tr|A0A318TEI2|A0A318TEI2_9BRAD	1	Malonyl CoA-acyl carrier protein transacylase OS=Rhodopseudomonas faecalis OX=99655 GN=BJ122_107116 PE=3 SV=1	2.89516	1.77412e-05
tr|A0A318TG42|A0A318TG42_9BRAD	1	Membrane fusion protein (Multidrug efflux system) OS=Rhodopseudomonas faecalis OX=99655 GN=BJ122_11087 PE=3 SV=1	2.53216	0.00701858
tr|Q72AI0|Q72AI0_DESVH	2	Metallo-beta-lactamase family protein OS=Desulfovibrio vulgaris (strain Hildenborough / ATCC 29579 / DSM 644 / NCIMB 8303) OX=882 GN=DVU_2014 PE=1 SV=1	0.50972	0.00125302
tr|A0A318TAZ7|A0A318TAZ7_9BRAD	2	Methylenetetrahydrofolate reductase OS=Rhodopseudomonas faecalis OX=99655 GN=BJ122_11866 PE=3 SV=1	4.56647	2.03238e-05
tr|A0A318TLR3|A0A318TLR3_9BRAD	5	Methylisocitrate lyase OS=Rhodopseudomonas faecalis OX=99655 GN=BJ122_101152 PE=3 SV=1	1.50412	0.0235681
tr|A0A318TNB8|A0A318TNB8_9BRAD	7	Methylmalonate-semialdehyde dehydrogenase [acylating] OS=Rhodopseudomonas faecalis OX=99655 GN=BJ122_101116 PE=4 SV=1	2.72732	5.05189e-05
tr|A0A318U0L4|A0A318U0L4_9BRAD	1	Methylmalonyl-CoA epimerase /ethylmalonyl-CoA epimerase OS=Rhodopseudomonas faecalis OX=99655 GN=BJ122_101202 PE=3 SV=1	1.97689	0.0250097
tr|A0A318T6X8|A0A318T6X8_9BRAD	1	Methylthioribose-1-phosphate isomerase OS=Rhodopseudomonas faecalis OX=99655 GN=mtnA PE=3 SV=1	0.199772	0.0163619
tr|A0A2T4JCL6|A0A2T4JCL6_RHOBL	1	MFS transporter OS=Rhodobacter blasticus DSM 2131 OX=1188250 GN=C5F44_04260 PE=4 SV=1	0.0887907	0.00554258
tr|A0A3G6WNV1|A0A3G6WNV1_RHOSH	1	Mg-protoporphyrin IX chelatase OS=Rhodobacter sphaeroides OX=1063 GN=bchI PE=3 SV=1	0.104668	0.0243508
tr|A0A318TI54|A0A318TI54_9BRAD	5	Mg-protoporphyrin IX chelatase OS=Rhodopseudomonas faecalis OX=99655 GN=BJ122_11095 PE=3 SV=1	2.73533	1.1312e-05
tr|A0A318THW2|A0A318THW2_9BRAD	2	Microcin-processing peptidase 1 OS=Rhodopseudomonas faecalis OX=99655 GN=BJ122_103105 PE=3 SV=1	0.462241	0.016006
tr|Q7M951|Q7M951_WOLSU	1	MOLYBDENUM COFACTOR BIOSYNTHESIS MOG OS=Wolinella succinogenes (strain ATCC 29543 / DSM 1740 / LMG 7466 / NCTC 11488 / FDC 602W) OX=273121 GN=MOG PE=4 SV=1	0.312905	0.0148042
tr|A0A318TN74|A0A318TN74_9BRAD	1	Molybdenum cofactor synthesis domain-containing protein OS=Rhodopseudomonas faecalis OX=99655 GN=BJ122_10157 PE=4 SV=1	1.53789	0.0341792
tr|Q7M9S7|Q7M9S7_WOLSU	6	MOLYBDOPTERIN OXIDOREDUCTASE, IRON-SULFUR BINDING SUBUNIT OS=Wolinella succinogenes (strain ATCC 29543 / DSM 1740 / LMG 7466 / NCTC 11488 / FDC 602W) OX=273121 GN=WS0708 PE=4 SV=1	0.206482	0.000460485
tr|D5ALP2|D5ALP2_RHOCB	1	Monosacharide ABC transporter, periplasmic monosacharide-binding protein OS=Rhodobacter capsulatus (strain ATCC BAA-309 / NBRC 16581 / SB1003) OX=272942 GN=RCAP_rcc02373 PE=4 SV=1	2.95026	0.0059065
tr|A0A318TDD0|A0A318TDD0_9BRAD	5	NAD(P) transhydrogenase alpha subunit OS=Rhodopseudomonas faecalis OX=99655 GN=BJ122_11183 PE=3 SV=1	2.88025	2.225e-05
tr|A0A318TCD7|A0A318TCD7_9BRAD	2	NAD(P) transhydrogenase subunit beta OS=Rhodopseudomonas faecalis OX=99655 GN=BJ122_11181 PE=3 SV=1	2.7712	7.36662e-05
tr|Q07J60|Q07J60_RHOP5	2	NAD(P)(+) transhydrogenase (AB-specific) OS=Rhodopseudomonas palustris (strain BisA53) OX=316055 GN=RPE_4098 PE=4 SV=1	2.71213	0.00207056
tr|B3QKQ6|B3QKQ6_RHOPT	2	NAD(P)(+) transhydrogenase (AB-specific) OS=Rhodopseudomonas palustris (strain TIE-1) OX=395960 GN=Rpal_4662 PE=3 SV=1	2.79137	0.00121997
tr|A0A318TLY5|A0A318TLY5_9BRAD	2	NAD(P)-dependent dehydrogenase (Short-subunit alcohol dehydrogenase family) OS=Rhodopseudomonas faecalis OX=99655 GN=BJ122_1095 PE=4 SV=1	3.23939	8.60699e-06
tr|A0A0Q0QHC9|A0A0Q0QHC9_RHOCA	1	NAD(P)-dependent dehydrogenase, short-chain alcohol dehydrogenase family OS=Rhodobacter capsulatus OX=1061 GN=SAMN04244550_01019 PE=3 SV=1	4.35998	0.0029366
tr|A0A4U1JPV4|A0A4U1JPV4_RHOCA	2	NAD-dependent succinate-semialdehyde dehydrogenase OS=Rhodobacter capsulatus OX=1061 GN=FBT96_11435 PE=3 SV=1	1.69541	0.00319848
tr|A0A318U0K5|A0A318U0K5_9BRAD	1	NADH-quinone oxidoreductase OS=Rhodopseudomonas faecalis OX=99655 GN=BJ122_101192 PE=3 SV=1	8.89061	0.00433298
tr|Q7M8K8|Q7M8K8_WOLSU	1	NEUTROPHIL-ACTIVATING PROTEIN (NEUTROPHIL ACTIVATING PROTEIN NAPA)(FRAGMENT) OS=Wolinella succinogenes (strain ATCC 29543 / DSM 1740 / LMG 7466 / NCTC 11488 / FDC 602W) OX=273121 GN=NAPA PE=3 SV=1	0.135874	0.000109231
tr|A0A318TP00|A0A318TP00_9BRAD	1	Nicotinate-nucleotide--dimethylbenzimidazole phosphoribosyltransferase OS=Rhodopseudomonas faecalis OX=99655 GN=cobT PE=3 SV=1	3.06202	8.3434e-05
tr|Q7MR04|Q7MR04_WOLSU	4	Nitro_FeMo-Co domain-containing protein OS=Wolinella succinogenes (strain ATCC 29543 / DSM 1740 / LMG 7466 / NCTC 11488 / FDC 602W) OX=273121 GN=WS1855 PE=4 SV=1	0.22662	5.92854e-06
tr|B8DNY9|B8DNY9_DESVM	1	Nitrogen regulatory protein P-II OS=Desulfovibrio vulgaris (strain Miyazaki F / DSM 19637) OX=883 GN=DvMF_0865 PE=3 SV=1	0.608233	0.0344493
tr|A0A318TKM7|A0A318TKM7_9BRAD	3	Nitrogen regulatory protein P-II OS=Rhodopseudomonas faecalis OX=99655 GN=BJ122_101171 PE=3 SV=1	2.81215	1.35595e-05
tr|A0A318TF09|A0A318TF09_9BRAD	1	Nitrogen regulatory protein P-II OS=Rhodopseudomonas faecalis OX=99655 GN=BJ122_11279 PE=3 SV=1	0.470837	0.0217947
tr|A0A318TK62|A0A318TK62_9BRAD	2	Nitrogenase iron protein OS=Rhodopseudomonas faecalis OX=99655 GN=nifH PE=3 SV=1	0.392312	0.000802724
tr|Q7M8V6|Q7M8V6_WOLSU	2	NON-HAEM IRON PROTEIN OS=Wolinella succinogenes (strain ATCC 29543 / DSM 1740 / LMG 7466 / NCTC 11488 / FDC 602W) OX=273121 GN=WS1374 PE=4 SV=1	0.508158	0.0140913
tr|A0A318TE09|A0A318TE09_9BRAD	2	Nucleoid DNA-binding protein OS=Rhodopseudomonas faecalis OX=99655 GN=BJ122_10836 PE=3 SV=1	2.5473	0.000130765
tr|A0A3G6WNG3|A0A3G6WNG3_RHOSH	1	Nucleoside diphosphate kinase OS=Rhodobacter sphaeroides OX=1063 GN=ndk PE=3 SV=1	5.84669	0.000651595
sp|Q7M7Z3|NDK_WOLSU	1	Nucleoside diphosphate kinase OS=Wolinella succinogenes (strain ATCC 29543 / DSM 1740 / LMG 7466 / NCTC 11488 / FDC 602W) OX=273121 GN=ndk PE=3 SV=1	0.379401	0.00435182
tr|Q3J4B8|Q3J4B8_RHOS4	4	Nucleoside-binding protein OS=Rhodobacter sphaeroides (strain ATCC 17023 / 2.4.1 / NCIB 8253 / DSM 158) OX=272943 GN=RSP_2211 PE=3 SV=1	1.88688	0.0132856
tr|A0A318TFG8|A0A318TFG8_9BRAD	1	Oligoendopeptidase F OS=Rhodopseudomonas faecalis OX=99655 GN=BJ122_11187 PE=3 SV=1	3.0848	7.66899e-05
tr|A0A1L8R4B8|A0A1L8R4B8_9ENTE	2	Oligopeptide ABC transporter, binding protein OS=Enterococcus canintestini OX=317010 GN=RU96_GL000786 PE=4 SV=1	0.521239	0.0110867
tr|X5NU67|X5NU67_ENTFL	2	Oligopeptide-binding protein oppA OS=Enterococcus faecalis CBRD01 OX=1400521 GN=P746_01746 PE=3 SV=1	0.193319	0.00845114
tr|A0A7H0XU39|A0A7H0XU39_RHOCA	3	OmpA family protein OS=Rhodobacter capsulatus OX=1061 GN=H9N28_12295 PE=4 SV=1	0.730684	0.0441175
tr|Q7M9R3|Q7M9R3_WOLSU	15	ORF7 PROTEIN OS=Wolinella succinogenes (strain ATCC 29543 / DSM 1740 / LMG 7466 / NCTC 11488 / FDC 602W) OX=273121 GN=WS0739 PE=3 SV=1	0.239305	0.000807258
tr|A0A318T900|A0A318T900_9BRAD	1	Ornithine carbamoyltransferase OS=Rhodopseudomonas faecalis OX=99655 GN=BJ122_1284 PE=3 SV=1	2.69724	0.03569
tr|A0A318TM98|A0A318TM98_9BRAD	1	Outer membrane immunogenic protein OS=Rhodopseudomonas faecalis OX=99655 GN=BJ122_109117 PE=4 SV=1	2.48504	0.00365481
tr|A0A388SIL3|A0A388SIL3_9DELT	12	Outer membrane protein A OS=Desulfovibrio sp. HK-II OX=2009266 GN=RVX_1128 PE=4 SV=1	0.591081	0.00669727
tr|A0A318TCA8|A0A318TCA8_9BRAD	3	Outer membrane protein OmpA-like peptidoglycan-associated protein OS=Rhodopseudomonas faecalis OX=99655 GN=BJ122_12263 PE=4 SV=1	2.09528	0.00487178
tr|R2SCC9|R2SCC9_9ENTE	1	Oxidoreductase, aldo/keto reductase OS=Enterococcus asini ATCC 700915 OX=1158606 GN=UAS_00188 PE=4 SV=1	0.442946	0.0256118
tr|A0A318TI72|A0A318TI72_9BRAD	3	Parvulin-like PPIase OS=Rhodopseudomonas faecalis OX=99655 GN=BJ122_12175 PE=3 SV=1	2.14598	0.000184194
tr|A0A318TFD4|A0A318TFD4_9BRAD	1	PBP family phospholipid-binding protein OS=Rhodopseudomonas faecalis OX=99655 GN=BJ122_11630 PE=4 SV=1	2.27407	0.000471065
tr|A0A318TGC4|A0A318TGC4_9BRAD	1	Peptidase_S15 domain-containing protein OS=Rhodopseudomonas faecalis OX=99655 GN=BJ122_10654 PE=4 SV=1	1.47098	0.00844527
tr|A0A330H296|A0A330H296_9RHOB	1	Peptide ABC transporter substrate-binding protein OS=Rhodobacter johrii OX=445629 GN=DDV93_18275 PE=3 SV=1	0.406107	0.00494742
tr|G2HAJ1|G2HAJ1_9DELT	4	Peptidoglycan-associated protein OS=Desulfovibrio sp. A2 OX=298701 GN=pal PE=3 SV=1	0.371783	8.04503e-05
tr|Q3J042|Q3J042_RHOS4	1	Peptidoglycan-associated protein OS=Rhodobacter sphaeroides (strain ATCC 17023 / 2.4.1 / NCIB 8253 / DSM 158) OX=272943 GN=pal PE=3 SV=1	1.47913	0.0408555
tr|Q7MSF2|Q7MSF2_WOLSU	6	Peptidoglycan-associated protein OS=Wolinella succinogenes (strain ATCC 29543 / DSM 1740 / LMG 7466 / NCTC 11488 / FDC 602W) OX=273121 GN=OMP18 PE=3 SV=1	0.237473	0.00113949
tr|A0A330HGS6|A0A330HGS6_9RHOB	2	Peptidyl-prolyl cis-trans isomerase OS=Rhodobacter johrii OX=445629 GN=DDV93_01990 PE=3 SV=1	0.486584	0.00832053
tr|Q6N6L1|Q6N6L1_RHOPA	1	Peptidyl-prolyl cis-trans isomerase OS=Rhodopseudomonas palustris (strain ATCC BAA-98 / CGA009) OX=258594 GN=RPA2604 PE=3 SV=1	0.401898	0.000489443
tr|Q7MA15|Q7MA15_WOLSU	2	Peptidyl-prolyl cis-trans isomerase OS=Wolinella succinogenes (strain ATCC 29543 / DSM 1740 / LMG 7466 / NCTC 11488 / FDC 602W) OX=273121 GN=SLYD PE=3 SV=1	0.349798	0.000382455
sp|P13629|PHFL_DESOM	3	Periplasmic [Fe] hydrogenase large subunit OS=Desulfovibrio oxamicus (strain Monticello) OX=884 GN=hydA PE=3 SV=1	1.94225	0.00809268
tr|G2H3H7|G2H3H7_9DELT	1	Periplasmic [NiFe] hydrogenase large subunit OS=Desulfovibrio sp. A2 OX=298701 GN=DA2_0289 PE=3 SV=1	1.5036	0.012444
tr|O30835|O30835_RHOSH	3	Periplasmic mannitol-binding protein OS=Rhodobacter sphaeroides OX=1063 GN=smoM PE=3 SV=1	1.81569	0.0236414
tr|B8DPH8|B8DPH8_DESVM	1	Periplasmic serine endoprotease DegP-like OS=Desulfovibrio vulgaris (strain Miyazaki F / DSM 19637) OX=883 GN=DvMF_0308 PE=3 SV=1	0.50234	0.0312182
tr|A0A318TKM6|A0A318TKM6_9BRAD	5	Periplasmic serine endoprotease DegP-like OS=Rhodopseudomonas faecalis OX=99655 GN=BJ122_102189 PE=3 SV=1	1.4758	0.0384977
tr|A0A318TAF1|A0A318TAF1_9BRAD	1	Periplasmic serine endoprotease DegP-like OS=Rhodopseudomonas faecalis OX=99655 GN=BJ122_1494 PE=3 SV=1	7.58769	0.00367214
tr|Q7M7L2|Q7M7L2_WOLSU	7	Periplasmic serine endoprotease DegP-like OS=Wolinella succinogenes (strain ATCC 29543 / DSM 1740 / LMG 7466 / NCTC 11488 / FDC 602W) OX=273121 GN=HTRA PE=3 SV=1	0.495411	0.00637907
tr|A0A318TJM4|A0A318TJM4_9BRAD	9	Phasin OS=Rhodopseudomonas faecalis OX=99655 GN=BJ122_10249 PE=4 SV=1	1.85901	0.0270462
tr|A0A318TFD2|A0A318TFD2_9BRAD	3	Phasin OS=Rhodopseudomonas faecalis OX=99655 GN=BJ122_11157 PE=4 SV=1	4.19456	0.00036245
tr|Q7MSU7|Q7MSU7_WOLSU	2	PHB domain-containing protein OS=Wolinella succinogenes (strain ATCC 29543 / DSM 1740 / LMG 7466 / NCTC 11488 / FDC 602W) OX=273121 GN=WS0091 PE=3 SV=1	0.664616	0.0147891
tr|A0A3D1J840|A0A3D1J840_ENTSX	1	Phosphate acetyltransferase OS=Enterococcus sp. OX=35783 GN=pta PE=3 SV=1	0.398758	0.00453525
tr|A0A318T6Y8|A0A318T6Y8_9BRAD	5	Phosphate-binding protein PstS OS=Rhodopseudomonas faecalis OX=99655 GN=BJ122_13814 PE=3 SV=1	2.25622	0.00306673
tr|Q7M8S4|Q7M8S4_WOLSU	1	Phospho-2-dehydro-3-deoxyheptonate aldolase OS=Wolinella succinogenes (strain ATCC 29543 / DSM 1740 / LMG 7466 / NCTC 11488 / FDC 602W) OX=273121 GN=WS1452 PE=3 SV=1	2.02452	0.0212815
tr|S0KCL5|S0KCL5_9ENTE	3	Phosphocarrier protein HPr OS=Enterococcus dispar ATCC 51266 OX=1139219 GN=OMK_01015 PE=3 SV=1	0.258913	0.00608499
tr|A0A318TJ74|A0A318TJ74_9BRAD	10	Phosphoenolpyruvate carboxykinase (ATP) OS=Rhodopseudomonas faecalis OX=99655 GN=pckA PE=3 SV=1	2.38205	0.000167636
tr|Q7M9L6|Q7M9L6_WOLSU	3	Phosphoenolpyruvate synthase OS=Wolinella succinogenes (strain ATCC 29543 / DSM 1740 / LMG 7466 / NCTC 11488 / FDC 602W) OX=273121 GN=WS0826 PE=3 SV=1	0.600548	0.000240443
tr|A0A1L8QXH4|A0A1L8QXH4_9ENTE	1	Phosphoenolpyruvate-protein phosphotransferase OS=Enterococcus aquimarinus OX=328396 GN=RU93_GL000130 PE=3 SV=1	0.243917	0.00808215
tr|S1NXN2|S1NXN2_9ENTE	1	Phosphoenolpyruvate-protein phosphotransferase OS=Enterococcus dispar ATCC 51266 OX=1139219 GN=OMK_01014 PE=3 SV=1	0.316088	0.0184037
tr|A0A242K5Y7|A0A242K5Y7_9ENTE	1	Phosphoenolpyruvate-protein phosphotransferase OS=Enterococcus sp. 9E7_DIV0242 OX=1834193 GN=A5888_001946 PE=3 SV=1	0.257109	0.00460999
tr|S0KH74|S0KH74_9ENTE	2	Phosphoglycerate kinase OS=Enterococcus dispar ATCC 51266 OX=1139219 GN=pgk PE=3 SV=1	0.422436	0.0170407
tr|A0A0Q0QVZ0|A0A0Q0QVZ0_RHOCA	2	Phosphoglycerate kinase OS=Rhodobacter capsulatus OX=1061 GN=pgk PE=3 SV=1	2.44193	0.0220905
tr|A0A318TE67|A0A318TE67_9BRAD	4	Phosphoglycerate kinase OS=Rhodopseudomonas faecalis OX=99655 GN=pgk PE=3 SV=1	2.20852	4.46393e-05
tr|A0A318TJN0|A0A318TJN0_9BRAD	1	Phosphoglycolate phosphatase OS=Rhodopseudomonas faecalis OX=99655 GN=BJ122_102298 PE=3 SV=1	2.23105	0.0379405
tr|B9KU91|B9KU91_RHOSK	1	Phosphoribosylanthranilate isomerase-like protein OS=Rhodobacter sphaeroides (strain KD131 / KCTC 12085) OX=557760 GN=RSKD131_3759 PE=4 SV=1	0.396431	0.00239144
tr|A0A318TNF7|A0A318TNF7_9BRAD	3	Phosphoribosylformylglycinamidine cyclo-ligase OS=Rhodopseudomonas faecalis OX=99655 GN=purM PE=3 SV=1	2.41573	0.000319704
tr|A0A318T6N1|A0A318T6N1_9BRAD	2	Phosphoribosylformylglycinamidine synthase subunit PurS OS=Rhodopseudomonas faecalis OX=99655 GN=purS PE=3 SV=1	1.49616	0.0215938
tr|A0A318TBE3|A0A318TBE3_9BRAD	6	Phosphoserine aminotransferase OS=Rhodopseudomonas faecalis OX=99655 GN=BJ122_11513 PE=4 SV=1	2.03739	0.000756547
tr|A0A4V2SH73|A0A4V2SH73_RUBGE	1	Photosynthetic reaction center cytochrome c subunit OS=Rubrivivax gelatinosus OX=28068 GN=EV684_103165 PE=4 SV=1	0.298357	0.000521315
tr|A0A0N8VFT4|A0A0N8VFT4_RHOCA	6	Photosynthetic reaction center H subunit OS=Rhodobacter capsulatus OX=1061 GN=SAMN04244550_01231 PE=4 SV=1	2.82961	0.00815653
tr|A4WR91|A4WR91_RHOS5	1	Photosynthetic reaction center H subunit OS=Rhodobacter sphaeroides (strain ATCC 17025 / ATH 2.4.3) OX=349102 GN=Rsph17025_1004 PE=4 SV=1	1.8593	0.0267483
tr|A0A318TD44|A0A318TD44_9BRAD	12	Photosynthetic reaction center H subunit OS=Rhodopseudomonas faecalis OX=99655 GN=BJ122_110138 PE=4 SV=1	3.44935	0.00011888
tr|A0A2T4J4Z7|A0A2T4J4Z7_RHOBL	3	Photosynthetic reaction center subunit H OS=Rhodobacter blasticus DSM 2131 OX=1188250 GN=puhA PE=4 SV=1	0.566981	0.0377338
tr|Q7B302|Q7B302_RHOSH	5	Photosynthetic reaction center subunit H OS=Rhodobacter sphaeroides OX=1063 GN=puhA PE=1 SV=1	2.02049	0.0274633
tr|A0A0E2PGB4|A0A0E2PGB4_RHOCA	2	Phytoene dehydrogenase OS=Rhodobacter capsulatus Y262 OX=1415161 GN=U715_04590 PE=3 SV=1	3.33541	0.000347855
tr|A0A318TBY0|A0A318TBY0_9BRAD	1	Pimeloyl-ACP methyl ester carboxylesterase OS=Rhodopseudomonas faecalis OX=99655 GN=BJ122_11411 PE=4 SV=1	0.253539	0.000921159
tr|A0A330HG13|A0A330HG13_9RHOB	2	Polyamine ABC transporter substrate-binding protein OS=Rhodobacter johrii OX=445629 GN=DDV93_00245 PE=3 SV=1	2.16893	0.00255465
tr|A0A318T8W5|A0A318T8W5_9BRAD	3	Polyhydroxyalkanoate synthesis repressor PhaR OS=Rhodopseudomonas faecalis OX=99655 GN=BJ122_12151 PE=4 SV=1	2.59164	3.97539e-05
tr|A0A4R2NVC5|A0A4R2NVC5_RHOAD	1	Polyketide-type polyunsaturated fatty acid synthase PfaA OS=Rhodovulum adriaticum OX=35804 GN=EV656_103104 PE=3 SV=1	0.335003	0.00472037
tr|A0A318TE72|A0A318TE72_9BRAD	12	Polyribonucleotide nucleotidyltransferase OS=Rhodopseudomonas faecalis OX=99655 GN=pnp PE=3 SV=1	1.92908	0.000364425
sp|P31075|PSRA_WOLSU	3	Polysulfide reductase chain A OS=Wolinella succinogenes (strain ATCC 29543 / DSM 1740 / LMG 7466 / NCTC 11488 / FDC 602W) OX=273121 GN=psrA PE=1 SV=1	0.463125	0.00354612
tr|A0A7H0XXE9|A0A7H0XXE9_RHOCA	6	Porin OS=Rhodobacter capsulatus OX=1061 GN=H9N28_01315 PE=4 SV=1	2.47727	0.00099898
tr|A0A318TNY1|A0A318TNY1_9BRAD	2	Porin OS=Rhodopseudomonas faecalis OX=99655 GN=BJ122_10686 PE=3 SV=1	3.74315	0.0144837
tr|Q9AKR9|Q9AKR9_RHOCA	2	Porphobilinogen deaminase OS=Rhodobacter capsulatus OX=1061 GN=hemC PE=3 SV=1	1.77998	0.0352412
tr|Q6N5M1|Q6N5M1_RHOPA	2	Possible DNA-binding protein hu-alpha (NS2) (HU-2) OS=Rhodopseudomonas palustris (strain ATCC BAA-98 / CGA009) OX=258594 GN=hupA PE=3 SV=1	2.12304	0.0338933
tr|Q7MSQ2|Q7MSQ2_WOLSU	2	PpiC domain-containing protein OS=Wolinella succinogenes (strain ATCC 29543 / DSM 1740 / LMG 7466 / NCTC 11488 / FDC 602W) OX=273121 GN=WS0233 PE=4 SV=1	0.407733	0.00491464
tr|A0A330H531|A0A330H531_9RHOB	2	Probable cytosol aminopeptidase OS=Rhodobacter johrii OX=445629 GN=pepA PE=3 SV=1	1.67243	0.00752844
tr|A0A318THL5|A0A318THL5_9BRAD	3	Probable cytosol aminopeptidase OS=Rhodopseudomonas faecalis OX=99655 GN=pepA PE=3 SV=1	1.52521	0.000291045
tr|A0A318TGI7|A0A318TGI7_9BRAD	3	Probable transcriptional regulatory protein BJ122_10998 OS=Rhodopseudomonas faecalis OX=99655 GN=BJ122_10998 PE=3 SV=1	2.3982	4.90097e-05
tr|A0A7H0XT06|A0A7H0XT06_RHOCA	2	Proline--tRNA ligase OS=Rhodobacter capsulatus OX=1061 GN=proS PE=3 SV=1	3.18017	0.00134347
tr|A0A318TUG1|A0A318TUG1_9BRAD	5	Propionyl-CoA carboxylase carboxyltransferase subunit OS=Rhodopseudomonas faecalis OX=99655 GN=BJ122_10711 PE=4 SV=1	2.19226	5.46321e-05
tr|A0A318TM49|A0A318TM49_9BRAD	8	Propionyl-CoA synthetase OS=Rhodopseudomonas faecalis OX=99655 GN=BJ122_104106 PE=3 SV=1	1.81901	0.00056567
tr|Q7M8B9|Q7M8B9_WOLSU	3	PROTEIN DISULPHIDE ISOMERASE OS=Wolinella succinogenes (strain ATCC 29543 / DSM 1740 / LMG 7466 / NCTC 11488 / FDC 602W) OX=273121 GN=WS1747 PE=4 SV=1	0.542421	0.0062282
tr|A0A318TCA3|A0A318TCA3_9BRAD	2	Protein GrpE OS=Rhodopseudomonas faecalis OX=99655 GN=grpE PE=3 SV=1	1.49256	0.00175381
sp|Q7MA34|GRPE_WOLSU	1	Protein GrpE OS=Wolinella succinogenes (strain ATCC 29543 / DSM 1740 / LMG 7466 / NCTC 11488 / FDC 602W) OX=273121 GN=grpE PE=3 SV=1	0.44184	0.0181564
tr|A0A318T9C4|A0A318T9C4_9BRAD	7	Protein HflK OS=Rhodopseudomonas faecalis OX=99655 GN=BJ122_12310 PE=3 SV=1	1.86024	0.000293456
tr|A0A318T800|A0A318T800_9BRAD	1	Protein RecA OS=Rhodopseudomonas faecalis OX=99655 GN=recA PE=3 SV=1	2.53187	0.000292374
tr|A0A318TA32|A0A318TA32_9BRAD	8	Protein translocase subunit SecA OS=Rhodopseudomonas faecalis OX=99655 GN=secA PE=3 SV=1	1.38774	0.0177626
tr|A0A318TGX4|A0A318TGX4_9BRAD	1	Protein translocase subunit SecD OS=Rhodopseudomonas faecalis OX=99655 GN=secD PE=3 SV=1	3.03649	0.00131506
tr|A0A318TCZ7|A0A318TCZ7_9BRAD	1	Protein-export protein SecB OS=Rhodopseudomonas faecalis OX=99655 GN=secB PE=3 SV=1	1.9296	0.016262
tr|Q7M9R9|Q7M9R9_WOLSU	1	PROTON/GLUTAMATE SYMPORTER OS=Wolinella succinogenes (strain ATCC 29543 / DSM 1740 / LMG 7466 / NCTC 11488 / FDC 602W) OX=273121 GN=WS0722 PE=4 SV=1	0.572477	0.0366374
tr|Q7M7U4|Q7M7U4_WOLSU	1	PURINE-BINDING CHEMOTAXIS PROTEIN CHEW OS=Wolinella succinogenes (strain ATCC 29543 / DSM 1740 / LMG 7466 / NCTC 11488 / FDC 602W) OX=273121 GN=WS2082 PE=4 SV=1	0.175006	0.00381565
tr|Q7MAL8|Q7MAL8_WOLSU	2	PUTATIVE 2 OS=Wolinella succinogenes (strain ATCC 29543 / DSM 1740 / LMG 7466 / NCTC 11488 / FDC 602W) OX=273121 GN=cysE PE=3 SV=1	0.307061	4.80302e-05
tr|S4E3R6|S4E3R6_ENTFL	1	Putative 2-oxoisovalerate dehydrogenase subunit beta OS=Enterococcus faecalis 13-SD-W-01 OX=1260356 GN=D920_02552 PE=4 SV=1	3.98611	0.000516013
tr|Q7M876|Q7M876_WOLSU	3	PUTATIVE ACYL-CoA DEHYDROGENASE OS=Wolinella succinogenes (strain ATCC 29543 / DSM 1740 / LMG 7466 / NCTC 11488 / FDC 602W) OX=273121 GN=FADE16 PE=3 SV=1	0.280149	1.59586e-06
tr|Q9Z4J3|Q9Z4J3_WOLSC	8	Putative C4-dicarboxylate-binding periplasmic protein OS=Wolinella succinogenes OX=844 GN=dctP PE=4 SV=1	0.339452	6.08133e-06
tr|Q7MAG8|Q7MAG8_WOLSU	3	PUTATIVE CHEMOTAXIS PROTEIN OS=Wolinella succinogenes (strain ATCC 29543 / DSM 1740 / LMG 7466 / NCTC 11488 / FDC 602W) OX=273121 GN=CHEV_1 PE=4 SV=1	0.543364	0.0109877
tr|A0A318T867|A0A318T867_9BRAD	1	Putative DNA-binding ribbon-helix-helix protein OS=Rhodopseudomonas faecalis OX=99655 GN=BJ122_12319 PE=4 SV=1	3.09641	7.25104e-05
tr|Q7M9R6|Q7M9R6_WOLSU	1	PUTATIVE FERREDOXIN OS=Wolinella succinogenes (strain ATCC 29543 / DSM 1740 / LMG 7466 / NCTC 11488 / FDC 602W) OX=273121 GN=WS0730 PE=4 SV=1	0.608752	0.0270213
tr|Q7MAM5|Q7MAM5_WOLSU	1	PUTATIVE FIBRONECTIN DOMAIN-CONTAINING LIPOPROTEIN OS=Wolinella succinogenes (strain ATCC 29543 / DSM 1740 / LMG 7466 / NCTC 11488 / FDC 602W) OX=273121 GN=WS0144 PE=4 SV=1	0.351887	0.000205935
tr|A0A1G7KVB9|A0A1G7KVB9_RHOCA	2	Putative hydroxymethylpyrimidine transport system substrate-binding protein OS=Rhodobacter capsulatus OX=1061 GN=SAMN04244550_02220 PE=4 SV=1	3.08759	0.00135297
tr|Q7M8X5|Q7M8X5_WOLSU	2	PUTATIVE MCP-DOMAIN SIGNAL TRANSDUCTION PROTEIN OS=Wolinella succinogenes (strain ATCC 29543 / DSM 1740 / LMG 7466 / NCTC 11488 / FDC 602W) OX=273121 GN=WS1337 PE=4 SV=1	0.584206	0.021088
tr|A0A318TDP3|A0A318TDP3_9BRAD	2	Putative membrane-anchored protein OS=Rhodopseudomonas faecalis OX=99655 GN=BJ122_11093 PE=4 SV=1	0.344195	0.0023771
sp|Q7MSU1|Y139_WOLSU	1	Putative nickel insertion protein OS=Wolinella succinogenes (strain ATCC 29543 / DSM 1740 / LMG 7466 / NCTC 11488 / FDC 602W) OX=273121 GN=WS0139 PE=3 SV=1	0.416297	0.00846427
tr|F3LV32|F3LV32_9BURK	2	Putative outer membrane signal peptide protein OS=Rubrivivax benzoatilyticus JA2 = ATCC BAA-35 OX=987059 GN=RBXJA2T_17801 PE=4 SV=1	0.652863	0.0216965
tr|Q7M8X7|Q7M8X7_WOLSU	2	PUTATIVE PERIPLASMIC PROTEIN OS=Wolinella succinogenes (strain ATCC 29543 / DSM 1740 / LMG 7466 / NCTC 11488 / FDC 602W) OX=273121 GN=WS1329 PE=4 SV=1	0.616046	0.0354058
tr|Q7M8V9|Q7M8V9_WOLSU	8	PUTATIVE PERIPLASMIC PROTEIN OS=Wolinella succinogenes (strain ATCC 29543 / DSM 1740 / LMG 7466 / NCTC 11488 / FDC 602W) OX=273121 GN=WS1370 PE=1 SV=1	0.2702	0.00211431
tr|Q7M8X4|Q7M8X4_WOLSU	2	PUTATIVE SIGNAL-TRANSDUCTION SENSOR PROTEIN OS=Wolinella succinogenes (strain ATCC 29543 / DSM 1740 / LMG 7466 / NCTC 11488 / FDC 602W) OX=273121 GN=WS1338 PE=4 SV=1	0.295346	0.00591285
tr|A0A1G7N8A1|A0A1G7N8A1_RHOCA	3	Putative spermidine/putrescine transport system substrate-binding protein OS=Rhodobacter capsulatus OX=1061 GN=SAMN04244550_02690 PE=3 SV=1	3.55256	0.00848261
tr|A0A0Q0QTW5|A0A0Q0QTW5_RHOCA	1	Putative spermidine/putrescine transport system substrate-binding protein OS=Rhodobacter capsulatus OX=1061 GN=SAMN04244550_02913 PE=4 SV=1	2.10779	0.0265885
tr|A0A318TEU6|A0A318TEU6_9BRAD	2	Putative surface protein with fasciclin (FAS1) repeats OS=Rhodopseudomonas faecalis OX=99655 GN=BJ122_1126 PE=4 SV=1	3.16848	0.00113809
tr|G2H407|G2H407_9DELT	1	Pyrophosphate phospho-hydrolase OS=Desulfovibrio sp. A2 OX=298701 GN=ppaC PE=3 SV=1	0.402552	0.000401261
tr|B9KNI0|B9KNI0_RHOSK	1	Pyruvate carboxylase OS=Rhodobacter sphaeroides (strain KD131 / KCTC 12085) OX=557760 GN=RSKD131_0398 PE=4 SV=1	2.09512	0.0460864
tr|Q7M7R6|Q7M7R6_WOLSU	1	PYRUVATE FERREDOXIN OXIDOREDUCTASE, BETA SUBUNIT OS=Wolinella succinogenes (strain ATCC 29543 / DSM 1740 / LMG 7466 / NCTC 11488 / FDC 602W) OX=273121 GN=WS2128 PE=4 SV=1	0.330486	0.0258937
tr|Q7M7R4|Q7M7R4_WOLSU	1	PYRUVATE FERREDOXIN OXIDOREDUCTASE, DELTA SUBUNIT OS=Wolinella succinogenes (strain ATCC 29543 / DSM 1740 / LMG 7466 / NCTC 11488 / FDC 602W) OX=273121 GN=WS2131 PE=4 SV=1	0.279463	0.00656222
tr|Q7M7R5|Q7M7R5_WOLSU	1	PYRUVATE SYNTHASE ALPHA SUBUNIT OS=Wolinella succinogenes (strain ATCC 29543 / DSM 1740 / LMG 7466 / NCTC 11488 / FDC 602W) OX=273121 GN=WS2130 PE=4 SV=1	0.516968	0.00952547
tr|A0A318TQ69|A0A318TQ69_9BRAD	5	Pyruvate, orthophosphate dikinase OS=Rhodopseudomonas faecalis OX=99655 GN=BJ122_10463 PE=3 SV=1	1.98025	0.00118893
tr|B8DMG0|B8DMG0_DESVM	1	Pyruvate:ferredoxin oxidoreductase OS=Desulfovibrio vulgaris (strain Miyazaki F / DSM 19637) OX=883 GN=DvMF_1860 PE=3 SV=1	0.411331	0.00703389
tr|A0A318TI59|A0A318TI59_9BRAD	10	Pyruvate-ferredoxin/flavodoxin oxidoreductase OS=Rhodopseudomonas faecalis OX=99655 GN=BJ122_103186 PE=3 SV=1	2.25803	3.356e-05
tr|Q8GIC2|Q8GIC2_9RHOB	3	Reaction center protein M chain (Fragment) OS=Rhodobacter azotoformans OX=43057 GN=pufM PE=3 SV=1	2.40008	0.0132898
tr|A0A0N8VFH9|A0A0N8VFH9_RHOCA	1	Reaction center protein M chain OS=Rhodobacter capsulatus OX=1061 GN=SAMN04244550_01266 PE=3 SV=1	3.33999	0.00541632
tr|Q07RZ8|Q07RZ8_RHOP5	2	Reaction center protein M chain OS=Rhodopseudomonas palustris (strain BisA53) OX=316055 GN=RPE_1334 PE=3 SV=1	1.64442	0.0220281
tr|Q7M9W8|Q7M9W8_WOLSU	1	RESPONSE REGULATOR OS=Wolinella succinogenes (strain ATCC 29543 / DSM 1740 / LMG 7466 / NCTC 11488 / FDC 602W) OX=273121 GN=CHEY PE=4 SV=1	0.426325	0.00562749
tr|A0A318TBT0|A0A318TBT0_9BRAD	2	Response regulator receiver domain-containing protein OS=Rhodopseudomonas faecalis OX=99655 GN=BJ122_11577 PE=4 SV=1	2.14273	0.00105285
tr|Q7MRI3|Q7MRI3_WOLSU	4	Rhodanese domain-containing protein OS=Wolinella succinogenes (strain ATCC 29543 / DSM 1740 / LMG 7466 / NCTC 11488 / FDC 602W) OX=273121 GN=WS1327 PE=4 SV=1	0.380582	6.28429e-07
tr|A0A318TJV5|A0A318TJV5_9BRAD	1	Ribonuclease PH OS=Rhodopseudomonas faecalis OX=99655 GN=rph PE=3 SV=1	2.29199	0.0110747
tr|A0A0Q0VI98|A0A0Q0VI98_RHOCA	1	Ribose-phosphate pyrophosphokinase OS=Rhodobacter capsulatus OX=1061 GN=prs PE=3 SV=1	0.319575	0.000636172
tr|R3W3B1|R3W3B1_9ENTE	1	Ribosome hibernation promoting factor OS=Enterococcus phoeniculicola ATCC BAA-412 OX=1158610 GN=hpf PE=3 SV=1	0.309981	0.00231622
tr|D5AKP1|D5AKP1_RHOCB	2	Ribosome hibernation promoting factor OS=Rhodobacter capsulatus (strain ATCC BAA-309 / NBRC 16581 / SB1003) OX=272942 GN=hpf PE=3 SV=1	0.431597	0.00668879
tr|A0A4V0WP62|A0A4V0WP62_9ENTE	1	Ribosome-recycling factor OS=Enterococcus florum OX=2480627 GN=frr PE=3 SV=1	0.445901	0.00275832
tr|A0A3G6WMT1|A0A3G6WMT1_RHOSH	2	Ribosome-recycling factor OS=Rhodobacter sphaeroides OX=1063 GN=frr PE=3 SV=1	3.17311	0.000783453
tr|A0A318TKX9|A0A318TKX9_9BRAD	3	Ribosome-recycling factor OS=Rhodopseudomonas faecalis OX=99655 GN=frr PE=3 SV=1	2.22558	0.000153523
sp|Q7MAD8|RRF_WOLSU	2	Ribosome-recycling factor OS=Wolinella succinogenes (strain ATCC 29543 / DSM 1740 / LMG 7466 / NCTC 11488 / FDC 602W) OX=273121 GN=frr PE=3 SV=1	0.449103	0.00480909
tr|A0A330HEN0|A0A330HEN0_9RHOB	1	Ribulose bisphosphate carboxylase OS=Rhodobacter johrii OX=445629 GN=cbbM PE=3 SV=1	0.474791	0.0260249
tr|A0A318TVC6|A0A318TVC6_9BRAD	6	Ribulose bisphosphate carboxylase OS=Rhodopseudomonas faecalis OX=99655 GN=cbbM PE=3 SV=1	2.4541	0.000114834
tr|A0A318TBK9|A0A318TBK9_9BRAD	3	RNA polymerase sigma factor OS=Rhodopseudomonas faecalis OX=99655 GN=BJ122_11575 PE=3 SV=1	1.62395	0.0246819
tr|G2H3A2|G2H3A2_9DELT	2	RNA recognition motif family protein OS=Desulfovibrio sp. A2 OX=298701 GN=DA2_0213 PE=4 SV=1	0.258574	0.00613697
tr|Q8KZA3|Q8KZA3_DESVU	1	Rubrerythrin OS=Desulfovibrio vulgaris OX=881 GN=rbr PE=4 SV=1	0.495011	0.0269066
tr|A0A318TCQ0|A0A318TCQ0_9BRAD	1	S1 motif domain-containing protein OS=Rhodopseudomonas faecalis OX=99655 GN=BJ122_11267 PE=4 SV=1	0.516825	0.0308043
tr|A0A318T815|A0A318T815_9BRAD	9	S41A family C-terminal processing peptidase-3 OS=Rhodopseudomonas faecalis OX=99655 GN=BJ122_12425 PE=3 SV=1	2.04123	1.1986e-05
tr|A0A318T8K1|A0A318T8K1_9BRAD	4	S-adenosylmethionine synthase OS=Rhodopseudomonas faecalis OX=99655 GN=metK PE=3 SV=1	1.85723	0.000116654
tr|I0HLG7|I0HLG7_RUBGI	1	S-adenosylmethionine synthase OS=Rubrivivax gelatinosus (strain NBRC 100245 / IL144) OX=983917 GN=metK PE=3 SV=1	0.35172	0.00168015
sp|Q7M7Z2|METK_WOLSU	6	S-adenosylmethionine synthase OS=Wolinella succinogenes (strain ATCC 29543 / DSM 1740 / LMG 7466 / NCTC 11488 / FDC 602W) OX=273121 GN=metK PE=3 SV=1	0.346948	0.000305201
tr|A0A242H0Y4|A0A242H0Y4_9ENTE	1	SAVED domain-containing protein OS=Enterococcus sp. 12C11_DIV0727 OX=1834167 GN=A5866_001091 PE=4 SV=1	3.18061	5.64195e-05
tr|A0A7H0Y090|A0A7H0Y090_RHOCA	1	Sec translocon accessory complex subunit YajC OS=Rhodobacter capsulatus OX=1061 GN=yajC PE=3 SV=1	2.16017	0.000735648
tr|A0A318TL35|A0A318TL35_9BRAD	1	Sec-independent protein translocase protein TatA OS=Rhodopseudomonas faecalis OX=99655 GN=tatA PE=3 SV=1	2.80139	6.59063e-06
tr|A0A318TMH5|A0A318TMH5_9BRAD	8	Secreted protein OS=Rhodopseudomonas faecalis OX=99655 GN=BJ122_102293 PE=3 SV=1	1.96588	0.000130761
tr|T2GBM7|T2GBM7_DESGG	1	Serine hydroxymethyltransferase OS=Desulfovibrio gigas (strain ATCC 19364 / DSM 1382 / NCIMB 9332 / VKM B-1759) OX=1121448 GN=glyA PE=3 SV=1	3.57535	2.44355e-05
tr|A0A318TPH9|A0A318TPH9_9BRAD	4	Serine hydroxymethyltransferase OS=Rhodopseudomonas faecalis OX=99655 GN=glyA PE=3 SV=1	2.63247	0.00118237
tr|E6VJB6|E6VJB6_RHOPX	1	Serine hydroxymethyltransferase OS=Rhodopseudomonas palustris (strain DX-1) OX=652103 GN=glyA PE=3 SV=1	0.347694	0.00247601
tr|A0A3S9L281|A0A3S9L281_9GAMM	1	Serine hydroxymethyltransferase OS=Shewanella khirikhana OX=1965282 GN=glyA PE=3 SV=1	0.122326	0.00968207
sp|Q7MAR0|GLYA_WOLSU	4	Serine hydroxymethyltransferase OS=Wolinella succinogenes (strain ATCC 29543 / DSM 1740 / LMG 7466 / NCTC 11488 / FDC 602W) OX=273121 GN=glyA PE=3 SV=1	0.476296	0.00014119
tr|A3PMP7|A3PMP7_RHOS1	1	S-formylglutathione hydrolase OS=Rhodobacter sphaeroides (strain ATCC 17029 / ATH 2.4.9) OX=349101 GN=Rsph17029_2511 PE=3 SV=1	3.73017	0.00140047
tr|A0A318TI86|A0A318TI86_9BRAD	10	Short chain enoyl-CoA hydratase /3-hydroxyacyl-CoA dehydrogenase OS=Rhodopseudomonas faecalis OX=99655 GN=BJ122_103227 PE=3 SV=1	1.76939	7.06375e-06
tr|A0A318TFD5|A0A318TFD5_9BRAD	2	Single cache domain-containing protein OS=Rhodopseudomonas faecalis OX=99655 GN=BJ122_10790 PE=4 SV=1	5.09113	0.00544525
tr|A0A318THE7|A0A318THE7_9BRAD	2	Single-stranded DNA-binding protein OS=Rhodopseudomonas faecalis OX=99655 GN=BJ122_105161 PE=3 SV=1	1.75555	0.014008
tr|Q3IZ35|Q3IZ35_RHOS4	1	Small heat shock protein OS=Rhodobacter sphaeroides (strain ATCC 17023 / 2.4.1 / NCIB 8253 / DSM 158) OX=272943 GN=RSP_1016 PE=3 SV=1	2.19601	0.0184883
tr|A0A318TAM1|A0A318TAM1_9BRAD	2	S-methyl-5'-thioadenosine phosphorylase OS=Rhodopseudomonas faecalis OX=99655 GN=mtnP PE=3 SV=1	2.72705	0.00831626
tr|A0A0Q0QNB7|A0A0Q0QNB7_RHOCA	3	Spermidine/putrescine transport system substrate-binding protein OS=Rhodobacter capsulatus OX=1061 GN=SAMN04244550_02550 PE=3 SV=1	4.68656	0.0056965
tr|A0A330HBR9|A0A330HBR9_9RHOB	5	Spheroidene monooxygenase OS=Rhodobacter johrii OX=445629 GN=DDV93_16490 PE=4 SV=1	2.07157	0.000498285
tr|A0A318THD6|A0A318THD6_9BRAD	1	Squalene-hopene/tetraprenyl-beta-curcumene cyclase OS=Rhodopseudomonas faecalis OX=99655 GN=BJ122_104114 PE=3 SV=1	1.8558	0.0323586
tr|G2HDL7|G2HDL7_9DELT	4	Ss-DNA binding protein 12RNP2 OS=Desulfovibrio sp. A2 OX=298701 GN=DA2_3887 PE=4 SV=1	0.3679	0.00165758
tr|A0A318TKY8|A0A318TKY8_9BRAD	4	Starvation-inducible DNA-binding protein OS=Rhodopseudomonas faecalis OX=99655 GN=BJ122_103151 PE=3 SV=1	1.63137	0.0351839
tr|A0A318T8H9|A0A318T8H9_9BRAD	4	Succinate dehydrogenase flavoprotein subunit OS=Rhodopseudomonas faecalis OX=99655 GN=BJ122_12268 PE=3 SV=1	2.08281	1.1487e-05
tr|D5APB4|D5APB4_RHOCB	1	Succinate--CoA ligase [ADP-forming] subunit alpha OS=Rhodobacter capsulatus (strain ATCC BAA-309 / NBRC 16581 / SB1003) OX=272942 GN=sucD PE=3 SV=1	4.96729	0.0171282
tr|A0A330HC69|A0A330HC69_9RHOB	2	Succinate--CoA ligase [ADP-forming] subunit alpha OS=Rhodobacter johrii OX=445629 GN=sucD PE=3 SV=1	3.94168	0.00502577
tr|A0A318TC46|A0A318TC46_9BRAD	3	Succinate--CoA ligase [ADP-forming] subunit alpha OS=Rhodopseudomonas faecalis OX=99655 GN=sucD PE=3 SV=1	2.79101	0.000116882
tr|Q07UX7|Q07UX7_RHOP5	1	Succinate--CoA ligase [ADP-forming] subunit alpha OS=Rhodopseudomonas palustris (strain BisA53) OX=316055 GN=sucD PE=3 SV=1	2.27631	0.000155254
tr|A0A3G6WQY2|A0A3G6WQY2_RHOSH	4	Succinate--CoA ligase [ADP-forming] subunit beta OS=Rhodobacter sphaeroides OX=1063 GN=sucC PE=3 SV=1	2.57753	0.000457913
tr|A0A318TBR7|A0A318TBR7_9BRAD	5	Succinate--CoA ligase [ADP-forming] subunit beta OS=Rhodopseudomonas faecalis OX=99655 GN=sucC PE=3 SV=1	2.25362	2.50946e-06
tr|A0A330HFG3|A0A330HFG3_9RHOB	1	Succinyl-CoA--3-ketoacid-CoA transferase OS=Rhodobacter johrii OX=445629 GN=DDV93_04520 PE=3 SV=1	3.19368	1.25222e-05
tr|A0A330HD18|A0A330HD18_9RHOB	1	Sugar ABC transporter substrate-binding protein OS=Rhodobacter johrii OX=445629 GN=DDV93_06840 PE=4 SV=1	3.50587	0.00289813
tr|A0A318TTL1|A0A318TTL1_9BRAD	5	Sugar transport protein OS=Rhodopseudomonas faecalis OX=99655 GN=BJ122_109111 PE=4 SV=1	1.60387	0.00606688
tr|G2H2R7|G2H2R7_9DELT	1	Sulfate adenylyltransferase OS=Desulfovibrio sp. A2 OX=298701 GN=sat PE=4 SV=1	0.459111	0.0011038
tr|Q93IH2|Q93IH2_WOLSC	14	Sulfur transferase OS=Wolinella succinogenes OX=844 GN=strA PE=4 SV=1	0.465139	0.00315965
tr|A0A318TJ39|A0A318TJ39_9BRAD	3	Superoxide dismutase OS=Rhodopseudomonas faecalis OX=99655 GN=BJ122_10833 PE=3 SV=1	1.90925	0.00391327
tr|A0A0N8VF37|A0A0N8VF37_RHOCA	1	Tat (Twin-arginine translocation) pathway signal sequence OS=Rhodobacter capsulatus OX=1061 GN=SAMN04244550_00281 PE=3 SV=1	2.9976	0.0366131
tr|A0A330HBW9|A0A330HBW9_9RHOB	2	Thiamine-binding periplasmic protein OS=Rhodobacter johrii OX=445629 GN=DDV93_04800 PE=3 SV=1	4.72696	0.00159645
tr|A0A7H0XV00|A0A7H0XV00_RHOCA	2	Thiamine-phosphate synthase OS=Rhodobacter capsulatus OX=1061 GN=thiE PE=3 SV=1	4.5048	5.85047e-05
tr|A0A3G6W8W9|A0A3G6W8W9_RHOSH	1	Thiamine-phosphate synthase OS=Rhodobacter sphaeroides OX=1063 GN=thiE PE=3 SV=1	2.56181	0.00910542
tr|Q7M8K4|Q7M8K4_WOLSU	2	Thiol peroxidase OS=Wolinella succinogenes (strain ATCC 29543 / DSM 1740 / LMG 7466 / NCTC 11488 / FDC 602W) OX=273121 GN=tpx PE=3 SV=1	1.82796	0.00968262
tr|Q3J242|Q3J242_RHOS4	2	Thioredoxin domain-containing protein OS=Rhodobacter sphaeroides (strain ATCC 17023 / 2.4.1 / NCIB 8253 / DSM 158) OX=272943 GN=RSP_2981 PE=3 SV=1	1.80385	0.00780595
tr|G2H3Y8|G2H3Y8_9DELT	5	Thioredoxin OS=Desulfovibrio sp. A2 OX=298701 GN=trx PE=3 SV=1	0.403154	0.0014871
tr|A0A318TBN8|A0A318TBN8_9BRAD	3	Thioredoxin OS=Rhodopseudomonas faecalis OX=99655 GN=BJ122_11273 PE=3 SV=1	0.415285	0.00389984
tr|Q7MSG6|Q7MSG6_WOLSU	5	Thioredoxin OS=Wolinella succinogenes (strain ATCC 29543 / DSM 1740 / LMG 7466 / NCTC 11488 / FDC 602W) OX=273121 GN=TRXA PE=3 SV=1	0.346336	0.00158624
tr|Q7M9S6|Q7M9S6_WOLSU	25	THIOSULFATE REDUCTASE OS=Wolinella succinogenes (strain ATCC 29543 / DSM 1740 / LMG 7466 / NCTC 11488 / FDC 602W) OX=273121 GN=fdhA PE=3 SV=1	0.315817	1.10708e-05
tr|Q3IZ68|Q3IZ68_RHOS4	1	TIGR02300 family protein OS=Rhodobacter sphaeroides (strain ATCC 17023 / 2.4.1 / NCIB 8253 / DSM 158) OX=272943 GN=RSP_0983 PE=4 SV=2	0.320281	0.000393298
tr|A0A7H0XW70|A0A7H0XW70_RHOCA	7	TonB-dependent receptor OS=Rhodobacter capsulatus OX=1061 GN=H9N28_16295 PE=3 SV=1	2.04981	0.0199859
tr|F3LS10|F3LS10_9BURK	1	TonB-dependent receptor OS=Rubrivivax benzoatilyticus JA2 = ATCC BAA-35 OX=987059 GN=RBXJA2T_12407 PE=3 SV=1	1.84167	0.0332505
tr|Q8EEB8|Q8EEB8_SHEON	1	TonB-dependent receptor OS=Shewanella oneidensis (strain MR-1) OX=211586 GN=SO_2469 PE=3 SV=1	0.375639	0.00462003
tr|Q7M9D6|Q7M9D6_WOLSU	6	TONB-DEPENDENT RECEPTOR OS=Wolinella succinogenes (strain ATCC 29543 / DSM 1740 / LMG 7466 / NCTC 11488 / FDC 602W) OX=273121 GN=WS0993 PE=3 SV=1	0.580184	0.00651165
tr|A0A318TD33|A0A318TD33_9BRAD	3	Transcription elongation factor GreA OS=Rhodopseudomonas faecalis OX=99655 GN=greA PE=3 SV=1	2.26467	8.56753e-05
tr|A0A318TF29|A0A318TF29_9BRAD	1	Transcription termination factor Rho OS=Rhodopseudomonas faecalis OX=99655 GN=rho PE=3 SV=1	2.20362	0.00583202
tr|D5ALC2|D5ALC2_RHOCB	2	Transcription termination/antitermination protein NusA OS=Rhodobacter capsulatus (strain ATCC BAA-309 / NBRC 16581 / SB1003) OX=272942 GN=nusA PE=3 SV=1	1.45333	0.0436309
tr|A0A318T8L6|A0A318T8L6_9BRAD	4	Transcription termination/antitermination protein NusA OS=Rhodopseudomonas faecalis OX=99655 GN=nusA PE=3 SV=1	2.01189	0.00584224
tr|A0A318T9C6|A0A318T9C6_9BRAD	3	Transcription termination/antitermination protein NusG OS=Rhodopseudomonas faecalis OX=99655 GN=nusG PE=3 SV=1	3.28605	8.746e-06
tr|Q7MA61|Q7MA61_WOLSU	1	Transcription termination/antitermination protein NusG OS=Wolinella succinogenes (strain ATCC 29543 / DSM 1740 / LMG 7466 / NCTC 11488 / FDC 602W) OX=273121 GN=NUSG PE=3 SV=1	0.199218	5.419e-05
tr|Q7M9J3|Q7M9J3_WOLSU	2	TRANSCRIPTIONAL REGULATOR (LYSR FAMILY) OS=Wolinella succinogenes (strain ATCC 29543 / DSM 1740 / LMG 7466 / NCTC 11488 / FDC 602W) OX=273121 GN=LYSR1 PE=3 SV=1	0.357941	0.00113762
tr|G2HA31|G2HA31_9DELT	2	Transcriptional regulator, MucR family OS=Desulfovibrio sp. A2 OX=298701 GN=DA2_2630 PE=3 SV=1	0.600754	0.00309621
tr|A0A318TFE9|A0A318TFE9_9BRAD	2	Transketolase OS=Rhodopseudomonas faecalis OX=99655 GN=BJ122_106136 PE=3 SV=1	2.9963	0.00167531
tr|A0A7H0XXA7|A0A7H0XXA7_RHOCA	2	Translation initiation factor IF-2 OS=Rhodobacter capsulatus OX=1061 GN=infB PE=3 SV=1	2.559	0.0285777
tr|A0A318T9T6|A0A318T9T6_9BRAD	9	Translation initiation factor IF-2 OS=Rhodopseudomonas faecalis OX=99655 GN=infB PE=3 SV=1	1.62103	0.000166771
tr|G2H5T1|G2H5T1_9DELT	1	Translation initiation factor IF-3 OS=Desulfovibrio sp. A2 OX=298701 GN=infC PE=3 SV=1	0.41638	0.000588483
tr|Q7MA31|Q7MA31_WOLSU	1	TRANSLATION INITIATION INHIBITOR OS=Wolinella succinogenes (strain ATCC 29543 / DSM 1740 / LMG 7466 / NCTC 11488 / FDC 602W) OX=273121 GN=WS0502 PE=3 SV=1	0.446892	0.0390115
tr|A0A330H776|A0A330H776_9RHOB	2	Transporter OS=Rhodobacter johrii OX=445629 GN=DDV93_12850 PE=4 SV=1	5.48087	1.98007e-05
tr|Q3IVM0|Q3IVM0_RHOS4	3	TRAP-T family transporter, periplasmic binding component OS=Rhodobacter sphaeroides (strain ATCC 17023 / 2.4.1 / NCIB 8253 / DSM 158) OX=272943 GN=RSP_1413 PE=4 SV=1	2.00691	0.000508482
tr|A0A3D1U5Y9|A0A3D1U5Y9_9DELT	1	Trigger factor OS=Desulfovibrio sp. OX=885 GN=tig PE=3 SV=1	0.489308	0.00123593
tr|A0A0E2PUC4|A0A0E2PUC4_RHOCA	1	Trigger factor OS=Rhodobacter capsulatus Y262 OX=1415161 GN=tig PE=3 SV=1	0.502493	0.0486527
sp|B9KJP3|TIG_RHOSK	4	Trigger factor OS=Rhodobacter sphaeroides (strain KD131 / KCTC 12085) OX=557760 GN=tig PE=3 SV=1	3.29427	1.99696e-06
tr|A0A318TLB3|A0A318TLB3_9BRAD	11	Trigger factor OS=Rhodopseudomonas faecalis OX=99655 GN=tig PE=3 SV=1	1.95566	9.38582e-06
tr|A0A2I0DWI5|A0A2I0DWI5_9GAMM	1	Trigger factor OS=Shewanella sp. GutDb-MelDb OX=2058316 GN=tig PE=3 SV=1	2.71599	0.0194189
sp|Q7M7M4|TIG_WOLSU	5	Trigger factor OS=Wolinella succinogenes (strain ATCC 29543 / DSM 1740 / LMG 7466 / NCTC 11488 / FDC 602W) OX=273121 GN=tig PE=3 SV=1	0.591814	0.00736759
tr|A0A318TC39|A0A318TC39_9BRAD	6	Tripartite-type tricarboxylate transporter receptor subunit TctC OS=Rhodopseudomonas faecalis OX=99655 GN=BJ122_111102 PE=3 SV=1	2.45218	0.00014992
tr|D5AMJ2|D5AMJ2_RHOCB	2	Tryptophan synthase beta chain OS=Rhodobacter capsulatus (strain ATCC BAA-309 / NBRC 16581 / SB1003) OX=272942 GN=trpB PE=3 SV=1	0.648387	0.0462529
tr|Q2J2Y6|Q2J2Y6_RHOP2	1	Two component transcriptional regulator, winged helix family OS=Rhodopseudomonas palustris (strain HaA2) OX=316058 GN=RPB_0463 PE=4 SV=1	1.77759	0.00134995
tr|Q7MAE4|Q7MAE4_WOLSU	3	TWO-COMPONENT REGULATOR OS=Wolinella succinogenes (strain ATCC 29543 / DSM 1740 / LMG 7466 / NCTC 11488 / FDC 602W) OX=273121 GN=WS0306 PE=4 SV=1	0.723542	0.0176274
tr|A0A7K3NJA2|A0A7K3NJA2_9DELT	1	Type I glyceraldehyde-3-phosphate dehydrogenase OS=Desulfovibrio sulfodismutans OX=63561 GN=gap PE=4 SV=1	0.485792	0.0251083
tr|A0A330HBE3|A0A330HBE3_9RHOB	2	Ubiquinol-cytochrome c reductase iron-sulfur subunit OS=Rhodobacter johrii OX=445629 GN=petA PE=3 SV=1	2.6087	0.00610771
tr|A0A318TR75|A0A318TR75_9BRAD	2	Ubiquinol-cytochrome c reductase iron-sulfur subunit OS=Rhodopseudomonas faecalis OX=99655 GN=BJ122_10358 PE=3 SV=1	2.27049	0.00230378
tr|A0A318TN21|A0A318TN21_9BRAD	3	Ubiquinol-cytochrome c reductase iron-sulfur subunit OS=Rhodopseudomonas faecalis OX=99655 GN=BJ122_10371 PE=3 SV=1	1.42495	0.00296733
tr|Q7M7Q2|Q7M7Q2_WOLSU	1	Ubiquinol-cytochrome c reductase iron-sulfur subunit OS=Wolinella succinogenes (strain ATCC 29543 / DSM 1740 / LMG 7466 / NCTC 11488 / FDC 602W) OX=273121 GN=PETA PE=3 SV=1	0.575758	0.0442757
tr|A0A1G7E9F0|A0A1G7E9F0_RHOCA	1	Uncharacterized conserved protein OS=Rhodobacter capsulatus OX=1061 GN=SAMN04244550_00696 PE=4 SV=1	2.48335	0.00810184
tr|A0A318TTZ6|A0A318TTZ6_9BRAD	1	Uncharacterized protein (DUF2147 family) OS=Rhodopseudomonas faecalis OX=99655 GN=BJ122_10834 PE=4 SV=1	1.95685	0.00106038
tr|A0A318TA03|A0A318TA03_9BRAD	2	Uncharacterized protein DUF2147 OS=Rhodopseudomonas faecalis OX=99655 GN=BJ122_12017 PE=4 SV=1	3.70134	4.12178e-06
tr|A0A318TAT7|A0A318TAT7_9BRAD	3	Uncharacterized protein DUF3297 OS=Rhodopseudomonas faecalis OX=99655 GN=BJ122_11816 PE=4 SV=1	3.431	2.52875e-06
tr|A0A318T9E7|A0A318T9E7_9BRAD	1	Uncharacterized protein DUF3365 OS=Rhodopseudomonas faecalis OX=99655 GN=BJ122_1255 PE=4 SV=1	4.19101	5.42438e-06
tr|A0A336JH08|A0A336JH08_9BRAD	2	Uncharacterized protein DUF3597 OS=Rhodopseudomonas pentothenatexigens OX=999699 GN=SAMN05892882_101161 PE=4 SV=1	0.659901	0.0056531
tr|A0A318T8T1|A0A318T8T1_9BRAD	4	Uncharacterized protein DUF992 OS=Rhodopseudomonas faecalis OX=99655 GN=BJ122_13123 PE=4 SV=1	1.68906	0.0278749
tr|A0A318TDP2|A0A318TDP2_9BRAD	1	Uncharacterized protein GlcG (DUF336 family) OS=Rhodopseudomonas faecalis OX=99655 GN=BJ122_11649 PE=4 SV=1	0.538582	0.0128374
tr|A0A1M7TES6|A0A1M7TES6_9DELT	1	Uncharacterized protein OS=Desulfovibrio litoralis DSM 11393 OX=1121455 GN=SAMN02745728_01918 PE=4 SV=1	0.405991	0.00657641
tr|G2H6J1|G2H6J1_9DELT	4	Uncharacterized protein OS=Desulfovibrio sp. A2 OX=298701 GN=DA2_1368 PE=3 SV=1	0.387221	0.00723847
tr|Q72F44|Q72F44_DESVH	2	Uncharacterized protein OS=Desulfovibrio vulgaris (strain Hildenborough / ATCC 29579 / DSM 644 / NCIMB 8303) OX=882 GN=DVU_0371 PE=4 SV=1	1.46553	0.00678061
tr|A0A6B1SDD5|A0A6B1SDD5_9ENTE	1	Uncharacterized protein OS=Enterococcus durans OX=53345 GN=GT389_08715 PE=4 SV=1	0.225111	0.0112631
tr|A0A242L279|A0A242L279_ENTMU	1	Uncharacterized protein OS=Enterococcus mundtii OX=53346 GN=A5802_001448 PE=4 SV=1	0.195545	0.00391706
tr|A0A0Q0QUG3|A0A0Q0QUG3_RHOCA	3	Uncharacterized protein OS=Rhodobacter capsulatus OX=1061 GN=SAMN04244550_03118 PE=4 SV=1	14.6653	0.00651996
tr|A0A1G7RRD8|A0A1G7RRD8_RHOCA	4	Uncharacterized protein OS=Rhodobacter capsulatus OX=1061 GN=SAMN04244550_03476 PE=4 SV=1	4.68118	0.00589657
tr|A0A330HGQ3|A0A330HGQ3_9RHOB	7	Uncharacterized protein OS=Rhodobacter johrii OX=445629 GN=DDV93_01555 PE=3 SV=1	2.64764	0.000335631
tr|Q3J0X8|Q3J0X8_RHOS4	3	Uncharacterized protein OS=Rhodobacter sphaeroides (strain ATCC 17023 / 2.4.1 / NCIB 8253 / DSM 158) OX=272943 GN=RSP_0381 PE=4 SV=1	4.31489	0.0101224
tr|Q3J5L7|Q3J5L7_RHOS4	4	Uncharacterized protein OS=Rhodobacter sphaeroides (strain ATCC 17023 / 2.4.1 / NCIB 8253 / DSM 158) OX=272943 GN=RSP_1770 PE=4 SV=1	1.65491	0.0271427
tr|Q3IXM6|Q3IXM6_RHOS4	1	Uncharacterized protein OS=Rhodobacter sphaeroides (strain ATCC 17023 / 2.4.1 / NCIB 8253 / DSM 158) OX=272943 GN=RSP_3092 PE=4 SV=1	2.04779	0.0246961
tr|Q3IVN0|Q3IVN0_RHOS4	3	Uncharacterized protein OS=Rhodobacter sphaeroides (strain ATCC 17023 / 2.4.1 / NCIB 8253 / DSM 158) OX=272943 GN=RSP_3796 PE=4 SV=1	3.7257	0.0018525
tr|A0A318TQW5|A0A318TQW5_9BRAD	1	Uncharacterized protein OS=Rhodopseudomonas faecalis OX=99655 GN=BJ122_101168 PE=4 SV=1	0.371712	0.00496107
tr|A0A318U0I7|A0A318U0I7_9BRAD	3	Uncharacterized protein OS=Rhodopseudomonas faecalis OX=99655 GN=BJ122_101169 PE=4 SV=1	3.13745	0.000412013
tr|A0A318TKQ5|A0A318TKQ5_9BRAD	2	Uncharacterized protein OS=Rhodopseudomonas faecalis OX=99655 GN=BJ122_101204 PE=4 SV=1	0.517974	0.0255676
tr|A0A318TJM1|A0A318TJM1_9BRAD	1	Uncharacterized protein OS=Rhodopseudomonas faecalis OX=99655 GN=BJ122_102132 PE=4 SV=1	0.161477	0.00475385
tr|A0A318TKA4|A0A318TKA4_9BRAD	1	Uncharacterized protein OS=Rhodopseudomonas faecalis OX=99655 GN=BJ122_10288 PE=4 SV=1	2.82625	0.000120676
tr|A0A318TIK8|A0A318TIK8_9BRAD	3	Uncharacterized protein OS=Rhodopseudomonas faecalis OX=99655 GN=BJ122_103178 PE=4 SV=1	1.45011	0.0363117
tr|A0A318TWX7|A0A318TWX7_9BRAD	1	Uncharacterized protein OS=Rhodopseudomonas faecalis OX=99655 GN=BJ122_10497 PE=4 SV=1	1.61072	0.0466126
tr|A0A318TPP8|A0A318TPP8_9BRAD	6	Uncharacterized protein OS=Rhodopseudomonas faecalis OX=99655 GN=BJ122_105153 PE=4 SV=1	1.61799	0.00776112
tr|A0A318TIU6|A0A318TIU6_9BRAD	1	Uncharacterized protein OS=Rhodopseudomonas faecalis OX=99655 GN=BJ122_10517 PE=4 SV=1	2.53836	0.00309485
tr|A0A318TFF6|A0A318TFF6_9BRAD	1	Uncharacterized protein OS=Rhodopseudomonas faecalis OX=99655 GN=BJ122_107108 PE=4 SV=1	0.54822	0.0260205
tr|A0A318TEB6|A0A318TEB6_9BRAD	1	Uncharacterized protein OS=Rhodopseudomonas faecalis OX=99655 GN=BJ122_10944 PE=4 SV=1	2.20332	0.000702107
tr|A0A318TT93|A0A318TT93_9BRAD	1	Uncharacterized protein OS=Rhodopseudomonas faecalis OX=99655 GN=BJ122_1099 PE=4 SV=1	1.69253	0.0225899
tr|A0A318TI44|A0A318TI44_9BRAD	6	Uncharacterized protein OS=Rhodopseudomonas faecalis OX=99655 GN=BJ122_11085 PE=4 SV=1	2.02767	0.00128856
tr|A0A318TH44|A0A318TH44_9BRAD	2	Uncharacterized protein OS=Rhodopseudomonas faecalis OX=99655 GN=BJ122_11269 PE=4 SV=1	1.742	0.0019458
tr|A0A318TC23|A0A318TC23_9BRAD	1	Uncharacterized protein OS=Rhodopseudomonas faecalis OX=99655 GN=BJ122_11338 PE=4 SV=1	3.77087	1.28853e-05
tr|A0A318TAQ2|A0A318TAQ2_9BRAD	2	Uncharacterized protein OS=Rhodopseudomonas faecalis OX=99655 GN=BJ122_11572 PE=4 SV=1	3.52132	0.000151617
tr|A0A318TEH7|A0A318TEH7_9BRAD	2	Uncharacterized protein OS=Rhodopseudomonas faecalis OX=99655 GN=BJ122_12061 PE=4 SV=1	0.362121	0.00011964
tr|A0A318T9X5|A0A318T9X5_9BRAD	1	Uncharacterized protein OS=Rhodopseudomonas faecalis OX=99655 GN=BJ122_12228 PE=4 SV=1	3.60741	0.00015745
tr|A0A318TBZ3|A0A318TBZ3_9BRAD	2	Uncharacterized protein OS=Rhodopseudomonas faecalis OX=99655 GN=BJ122_12327 PE=4 SV=1	1.90592	0.021643
tr|A0A318T826|A0A318T826_9BRAD	1	Uncharacterized protein OS=Rhodopseudomonas faecalis OX=99655 GN=BJ122_12630 PE=4 SV=1	0.494934	0.0458474
tr|A0A318T8W4|A0A318T8W4_9BRAD	1	Uncharacterized protein OS=Rhodopseudomonas faecalis OX=99655 GN=BJ122_12747 PE=4 SV=1	2.3339	0.0431261
tr|A0A318T8E7|A0A318T8E7_9BRAD	2	Uncharacterized protein OS=Rhodopseudomonas faecalis OX=99655 GN=BJ122_13312 PE=4 SV=1	2.18002	0.0400634
tr|A0A318T7Z9|A0A318T7Z9_9BRAD	2	Uncharacterized protein OS=Rhodopseudomonas faecalis OX=99655 GN=BJ122_13915 PE=4 SV=1	0.391153	0.00738856
tr|A0A318TAD2|A0A318TAD2_9BRAD	3	Uncharacterized protein OS=Rhodopseudomonas faecalis OX=99655 GN=BJ122_1602 PE=4 SV=1	2.11272	0.00051835
tr|Q6N372|Q6N372_RHOPA	1	Uncharacterized protein OS=Rhodopseudomonas palustris (strain ATCC BAA-98 / CGA009) OX=258594 GN=RPA3822 PE=4 SV=1	0.268199	0.000577448
tr|E6VF67|E6VF67_RHOPX	1	Uncharacterized protein OS=Rhodopseudomonas palustris (strain DX-1) OX=652103 GN=Rpdx1_0093 PE=4 SV=1	0.411338	0.0286562
tr|E6VHX3|E6VHX3_RHOPX	1	Uncharacterized protein OS=Rhodopseudomonas palustris (strain DX-1) OX=652103 GN=Rpdx1_3865 PE=4 SV=1	1.70011	0.0165756
tr|E6VJN2|E6VJN2_RHOPX	1	Uncharacterized protein OS=Rhodopseudomonas palustris (strain DX-1) OX=652103 GN=Rpdx1_4026 PE=4 SV=1	2.90631	0.00429618
tr|A0A0D7EG92|A0A0D7EG92_RHOPL	1	Uncharacterized protein OS=Rhodopseudomonas palustris OX=1076 GN=OO17_20155 PE=4 SV=1	1.85353	0.0223538
tr|A0A519GCG9|A0A519GCG9_9BURK	1	Uncharacterized protein OS=Rubrivivax sp. OX=50259 GN=EOP38_04265 PE=4 SV=1	2.33338	2.15045e-06
tr|Q12P20|Q12P20_SHEDO	1	Uncharacterized protein OS=Shewanella denitrificans (strain OS217 / ATCC BAA-1090 / DSM 15013) OX=318161 GN=Sden_1521 PE=4 SV=1	0.121906	0.013372
tr|Q7MR55|Q7MR55_WOLSU	5	Uncharacterized protein OS=Wolinella succinogenes (strain ATCC 29543 / DSM 1740 / LMG 7466 / NCTC 11488 / FDC 602W) OX=273121 GN=fliD PE=4 SV=1	0.401886	0.00345476
tr|Q7MSV3|Q7MSV3_WOLSU	5	Uncharacterized protein OS=Wolinella succinogenes (strain ATCC 29543 / DSM 1740 / LMG 7466 / NCTC 11488 / FDC 602W) OX=273121 GN=WS0076 PE=4 SV=1	0.101392	0.00174449
tr|Q7MSN0|Q7MSN0_WOLSU	3	Uncharacterized protein OS=Wolinella succinogenes (strain ATCC 29543 / DSM 1740 / LMG 7466 / NCTC 11488 / FDC 602W) OX=273121 GN=WS0286 PE=4 SV=1	0.57662	0.00499172
tr|Q7MSG9|Q7MSG9_WOLSU	1	Uncharacterized protein OS=Wolinella succinogenes (strain ATCC 29543 / DSM 1740 / LMG 7466 / NCTC 11488 / FDC 602W) OX=273121 GN=WS0447 PE=4 SV=1	0.310533	0.00880164
tr|Q7MSA6|Q7MSA6_WOLSU	24	Uncharacterized protein OS=Wolinella succinogenes (strain ATCC 29543 / DSM 1740 / LMG 7466 / NCTC 11488 / FDC 602W) OX=273121 GN=WS0627 PE=4 SV=1	0.265889	0.000655717
tr|Q7MS99|Q7MS99_WOLSU	5	Uncharacterized protein OS=Wolinella succinogenes (strain ATCC 29543 / DSM 1740 / LMG 7466 / NCTC 11488 / FDC 602W) OX=273121 GN=WS0645 PE=4 SV=1	0.310769	0.00110072
tr|Q7MS49|Q7MS49_WOLSU	6	Uncharacterized protein OS=Wolinella succinogenes (strain ATCC 29543 / DSM 1740 / LMG 7466 / NCTC 11488 / FDC 602W) OX=273121 GN=WS0773 PE=4 SV=1	0.497796	0.00168331
tr|Q7MRW0|Q7MRW0_WOLSU	3	Uncharacterized protein OS=Wolinella succinogenes (strain ATCC 29543 / DSM 1740 / LMG 7466 / NCTC 11488 / FDC 602W) OX=273121 GN=WS1001 PE=3 SV=1	0.382872	0.002146
tr|Q7MRL4|Q7MRL4_WOLSU	2	Uncharacterized protein OS=Wolinella succinogenes (strain ATCC 29543 / DSM 1740 / LMG 7466 / NCTC 11488 / FDC 602W) OX=273121 GN=WS1240 PE=4 SV=1	0.32983	0.00225475
tr|Q7MRG8|Q7MRG8_WOLSU	3	Uncharacterized protein OS=Wolinella succinogenes (strain ATCC 29543 / DSM 1740 / LMG 7466 / NCTC 11488 / FDC 602W) OX=273121 GN=WS1373 PE=4 SV=1	0.284587	1.61701e-08
tr|Q7MRG7|Q7MRG7_WOLSU	1	Uncharacterized protein OS=Wolinella succinogenes (strain ATCC 29543 / DSM 1740 / LMG 7466 / NCTC 11488 / FDC 602W) OX=273121 GN=WS1377 PE=4 SV=1	0.298136	0.000127186
tr|Q7MR36|Q7MR36_WOLSU	5	Uncharacterized protein OS=Wolinella succinogenes (strain ATCC 29543 / DSM 1740 / LMG 7466 / NCTC 11488 / FDC 602W) OX=273121 GN=WS1756 PE=4 SV=1	0.344654	3.44297e-05
tr|Q7MR23|Q7MR23_WOLSU	9	Uncharacterized protein OS=Wolinella succinogenes (strain ATCC 29543 / DSM 1740 / LMG 7466 / NCTC 11488 / FDC 602W) OX=273121 GN=WS1779 PE=4 SV=1	0.357204	0.00311514
tr|Q7MR22|Q7MR22_WOLSU	1	Uncharacterized protein OS=Wolinella succinogenes (strain ATCC 29543 / DSM 1740 / LMG 7466 / NCTC 11488 / FDC 602W) OX=273121 GN=WS1780 PE=4 SV=1	0.414322	0.0419124
tr|Q7MQP4|Q7MQP4_WOLSU	1	Uncharacterized protein OS=Wolinella succinogenes (strain ATCC 29543 / DSM 1740 / LMG 7466 / NCTC 11488 / FDC 602W) OX=273121 GN=WS2123 PE=4 SV=1	0.162823	6.20762e-07
tr|A0A318THU0|A0A318THU0_9BRAD	2	Uncharacterized protein YjbJ (UPF0337 family) OS=Rhodopseudomonas faecalis OX=99655 GN=BJ122_1229 PE=3 SV=1	1.99697	0.00384694
tr|A0A318TFS8|A0A318TFS8_9BRAD	3	Universal stress protein family protein OS=Rhodopseudomonas faecalis OX=99655 GN=BJ122_11558 PE=3 SV=1	0.581771	0.00706012
tr|A0A388SJC6|A0A388SJC6_9DELT	1	Universal stress protein OS=Desulfovibrio sp. HK-II OX=2009266 GN=RVX_0611 PE=3 SV=1	2.36345	0.00243092
tr|B8DP29|B8DP29_DESVM	2	Universal stress protein OS=Desulfovibrio vulgaris (strain Miyazaki F / DSM 19637) OX=883 GN=DvMF_0906 PE=3 SV=1	1.71715	0.00864544
tr|A0A330HIC0|A0A330HIC0_9RHOB	5	Universal stress protein OS=Rhodobacter johrii OX=445629 GN=DDV93_08445 PE=3 SV=1	1.45644	0.00484212
tr|A0A330H1T2|A0A330H1T2_9RHOB	1	Universal stress protein OS=Rhodobacter johrii OX=445629 GN=DDV93_18620 PE=3 SV=1	2.53645	0.0190426
tr|A0A318U339|A0A318U339_9RHOB	1	Uridylate kinase OS=Rhodobacter viridis OX=1054202 GN=pyrH PE=3 SV=1	0.151871	0.000380006
tr|A0A3G6WQ45|A0A3G6WQ45_RHOSH	2	Uroporphyrinogen decarboxylase OS=Rhodobacter sphaeroides OX=1063 GN=hemE PE=3 SV=1	2.20715	0.00139248
tr|A0A318TDD9|A0A318TDD9_9BRAD	6	Uroporphyrinogen decarboxylase OS=Rhodopseudomonas faecalis OX=99655 GN=hemE PE=3 SV=1	2.42071	3.40588e-05
tr|Q93IH4|Q93IH4_WOLSC	1	Usp domain-containing protein (Fragment) OS=Wolinella succinogenes OX=844 PE=3 SV=1	4.26035	0.0050362
tr|Q79HR6|Q79HR6_WOLSU	1	Usp domain-containing protein OS=Wolinella succinogenes (strain ATCC 29543 / DSM 1740 / LMG 7466 / NCTC 11488 / FDC 602W) OX=273121 GN=WS0834 PE=3 SV=1	0.135204	4.61814e-05
tr|A0A0Q0ZZ02|A0A0Q0ZZ02_RHOCA	1	UTP--glucose-1-phosphate uridylyltransferase OS=Rhodobacter capsulatus OX=1061 GN=SAMN04244550_00845 PE=3 SV=1	2.46896	0.0358238
tr|A0A318TDF8|A0A318TDF8_9BRAD	5	Valine--tRNA ligase OS=Rhodopseudomonas faecalis OX=99655 GN=valS PE=3 SV=1	0.591312	0.0382537
tr|Q7MQL2|Q7MQL2_WOLSU	3	YceI domain-containing protein OS=Wolinella succinogenes (strain ATCC 29543 / DSM 1740 / LMG 7466 / NCTC 11488 / FDC 602W) OX=273121 GN=WS2216 PE=4 SV=1	0.386908	0.00627493

## Sheet: 0.8V vs. OC
ID_PROT	# peptides	Name	0,8V/0V	p value
tr|A0A318TK44|A0A318TK44_9BRAD	1	(R)-citramalate synthase OS=Rhodopseudomonas faecalis OX=99655 GN=BJ122_102312 PE=3 SV=1	0.253703	0.00261687
tr|A0A1D9MAE0|A0A1D9MAE0_9RHOB	1	10 kDa chaperonin OS=Rhodobacter sp. LPB0142 OX=1850250 GN=groS PE=3 SV=1	2.40888	0.034448
tr|A0A318U076|A0A318U076_9BRAD	3	10 kDa chaperonin OS=Rhodopseudomonas faecalis OX=99655 GN=groS PE=3 SV=1	4.3505	0.00159506
tr|B3QEQ6|B3QEQ6_RHOPT	1	10 kDa chaperonin OS=Rhodopseudomonas palustris (strain TIE-1) OX=395960 GN=groS PE=3 SV=1	0.54606	0.0320828
tr|A0A318TUC7|A0A318TUC7_9BRAD	2	1-deoxy-D-xylulose 5-phosphate reductoisomerase OS=Rhodopseudomonas faecalis OX=99655 GN=dxr PE=3 SV=1	0.44363	0.0168093
tr|A0A318TD48|A0A318TD48_9BRAD	2	1-deoxy-D-xylulose-5-phosphate synthase OS=Rhodopseudomonas faecalis OX=99655 GN=dxs PE=3 SV=1	4.63078	0.0053694
tr|A0A318T6Z1|A0A318T6Z1_9BRAD	2	2,3,4,5-tetrahydropyridine-2,6-dicarboxylate N-succinyltransferase OS=Rhodopseudomonas faecalis OX=99655 GN=dapD PE=3 SV=1	2.30248	0.0108454
tr|A0A318TEE2|A0A318TEE2_9BRAD	1	2Fe-2S ferredoxin OS=Rhodopseudomonas faecalis OX=99655 GN=BJ122_12021 PE=3 SV=1	3.06863	0.0106029
tr|A0A318TKK7|A0A318TKK7_9BRAD	7	2-methylcitrate dehydratase OS=Rhodopseudomonas faecalis OX=99655 GN=BJ122_101150 PE=3 SV=1	3.39862	0.0147179
tr|A0A1H8UFK0|A0A1H8UFK0_9BRAD	1	2-methylcitrate dehydratase OS=Rhodopseudomonas pseudopalustris OX=1513892 GN=SAMN05444123_10714 PE=3 SV=1	8.61461	0.00938775
tr|A0A318TI19|A0A318TI19_9BRAD	3	2-oxoglutarate ferredoxin oxidoreductase alpha subunit OS=Rhodopseudomonas faecalis OX=99655 GN=BJ122_10329 PE=4 SV=1	2.73482	0.00902347
tr|R2SFU1|R2SFU1_9ENTE	1	2-oxoglutarate reductase OS=Enterococcus pallens ATCC BAA-351 OX=1158607 GN=UAU_01960 PE=3 SV=1	0.255299	0.0144408
tr|A0A3D1U597|A0A3D1U597_9DELT	3	30S ribosomal protein S1 OS=Desulfovibrio sp. OX=885 GN=DEV75_03170 PE=4 SV=1	0.522631	0.0142191
tr|I6SFZ9|I6SFZ9_ENTHA	1	30S ribosomal protein S1 OS=Enterococcus hirae (strain ATCC 9790 / DSM 20160 / JCM 8729 / LMG 6399 / NBRC 3181 / NCIMB 6459 / NCDO 1258) OX=768486 GN=rpsA PE=4 SV=1	0.28394	0.0147144
tr|A0A7H0Y1I7|A0A7H0Y1I7_RHOCA	6	30S ribosomal protein S1 OS=Rhodobacter capsulatus OX=1061 GN=rpsA PE=3 SV=1	2.50137	0.0260925
tr|A0A318TBK3|A0A318TBK3_9BRAD	4	30S ribosomal protein S1 OS=Rhodopseudomonas faecalis OX=99655 GN=BJ122_11230 PE=3 SV=1	3.95008	0.00416868
tr|Q7M8Y5|Q7M8Y5_WOLSU	14	30S RIBOSOMAL PROTEIN S1 OS=Wolinella succinogenes (strain ATCC 29543 / DSM 1740 / LMG 7466 / NCTC 11488 / FDC 602W) OX=273121 GN=RPSA PE=4 SV=1	0.611616	0.0367725
tr|S4FEN1|S4FEN1_ENTFC	3	30S ribosomal protein S10 OS=Enterococcus faecium SD3B-2 OX=1244155 GN=rpsJ PE=3 SV=1	0.441592	0.0469786
tr|E6VBV5|E6VBV5_RHOPX	1	30S ribosomal protein S10 OS=Rhodopseudomonas palustris (strain DX-1) OX=652103 GN=rpsJ PE=3 SV=1	2.49466	0.000367019
tr|A0A3G6WJW3|A0A3G6WJW3_RHOSH	1	30S ribosomal protein S11 OS=Rhodobacter sphaeroides OX=1063 GN=rpsK PE=3 SV=1	2.72586	0.0456726
tr|A0A318T8Y8|A0A318T8Y8_9BRAD	3	30S ribosomal protein S11 OS=Rhodopseudomonas faecalis OX=99655 GN=rpsK PE=3 SV=1	3.29237	0.00301392
tr|A0A242LMD0|A0A242LMD0_9ENTE	2	30S ribosomal protein S12 OS=Enterococcus sp. 7D2_DIV0200 OX=1834187 GN=rpsL PE=3 SV=1	0.241831	0.028406
tr|E6VBV1|E6VBV1_RHOPX	2	30S ribosomal protein S12 OS=Rhodopseudomonas palustris (strain DX-1) OX=652103 GN=rpsL PE=3 SV=1	4.70028	0.00111938
tr|S0L387|S0L387_ENTAV	1	30S ribosomal protein S13 OS=Enterococcus avium ATCC 14025 OX=1140002 GN=rpsM PE=3 SV=1	0.345801	0.0156233
tr|A0A318TAH9|A0A318TAH9_9BRAD	3	30S ribosomal protein S13 OS=Rhodopseudomonas faecalis OX=99655 GN=rpsM PE=3 SV=1	2.73105	0.00365153
tr|A0A318TCE2|A0A318TCE2_9BRAD	1	30S ribosomal protein S15 OS=Rhodopseudomonas faecalis OX=99655 GN=rpsO PE=3 SV=1	7.49808	0.000180904
tr|A0A318TAJ2|A0A318TAJ2_9BRAD	2	30S ribosomal protein S16 OS=Rhodopseudomonas faecalis OX=99655 GN=rpsP PE=3 SV=1	1.84338	0.0280699
tr|A0A318TAD8|A0A318TAD8_9BRAD	1	30S ribosomal protein S17 OS=Rhodopseudomonas faecalis OX=99655 GN=rpsQ PE=3 SV=1	2.96862	0.00654201
tr|A0A318T9A5|A0A318T9A5_9BRAD	1	30S ribosomal protein S19 OS=Rhodopseudomonas faecalis OX=99655 GN=rpsS PE=3 SV=1	2.99858	0.000590769
tr|A0A1L8QXE2|A0A1L8QXE2_9ENTE	1	30S ribosomal protein S2 OS=Enterococcus aquimarinus OX=328396 GN=rpsB PE=3 SV=1	0.232165	0.000401127
tr|A0A318U0M4|A0A318U0M4_9BRAD	5	30S ribosomal protein S2 OS=Rhodopseudomonas faecalis OX=99655 GN=rpsB PE=3 SV=1	3.56859	0.000123268
tr|A0A318TN51|A0A318TN51_9BRAD	2	30S ribosomal protein S20 OS=Rhodopseudomonas faecalis OX=99655 GN=rpsT PE=3 SV=1	5.13101	0.000291093
tr|A0A0N1C4N5|A0A0N1C4N5_9BRAD	1	30S ribosomal protein S21 OS=Rhodopseudomonas sp. AAP120 OX=1523430 GN=rpsU PE=3 SV=1	2.59441	0.00819618
tr|S0K1G2|S0K1G2_9ENTE	1	30S ribosomal protein S3 OS=Enterococcus dispar ATCC 51266 OX=1139219 GN=rpsC PE=3 SV=1	0.354721	0.000568564
tr|A0A318TPS2|A0A318TPS2_9BRAD	2	30S ribosomal protein S3 OS=Rhodopseudomonas faecalis OX=99655 GN=rpsC PE=3 SV=1	3.10398	0.00605321
tr|A0A0Q0WBR2|A0A0Q0WBR2_RHOCA	3	30S ribosomal protein S4 OS=Rhodobacter capsulatus OX=1061 GN=rpsD PE=3 SV=1	1.41376	0.0432925
tr|A0A318TLN4|A0A318TLN4_9BRAD	2	30S ribosomal protein S4 OS=Rhodopseudomonas faecalis OX=99655 GN=rpsD PE=3 SV=1	2.18321	0.0374391
tr|A0A318THV6|A0A318THV6_9BRAD	7	30S ribosomal protein S6 OS=Rhodopseudomonas faecalis OX=99655 GN=rpsF PE=3 SV=1	2.16279	0.0150037
tr|A0A4U4EBW4|A0A4U4EBW4_9ENTE	2	30S ribosomal protein S7 OS=Enterococcus sp. VV15 OX=2233541 GN=rpsG PE=3 SV=1	0.269938	0.00308791
tr|G2H5R7|G2H5R7_9DELT	1	30S ribosomal protein S9 OS=Desulfovibrio sp. A2 OX=298701 GN=rpsI PE=3 SV=1	0.381712	0.0282974
tr|A0A330H4P3|A0A330H4P3_9RHOB	2	30S ribosomal protein S9 OS=Rhodobacter johrii OX=445629 GN=rpsI PE=3 SV=1	3.04183	0.00301656
tr|A0A318TL74|A0A318TL74_9BRAD	4	30S ribosomal protein S9 OS=Rhodopseudomonas faecalis OX=99655 GN=rpsI PE=3 SV=1	2.97847	0.00675855
tr|A0A318TC20|A0A318TC20_9BRAD	6	3-isopropylmalate dehydratase large subunit OS=Rhodopseudomonas faecalis OX=99655 GN=leuC PE=3 SV=1	1.79254	0.0290547
tr|A0A318TBA6|A0A318TBA6_9BRAD	3	3-isopropylmalate dehydrogenase OS=Rhodopseudomonas faecalis OX=99655 GN=leuB PE=3 SV=1	2.05443	0.00147148
tr|A0A318TA66|A0A318TA66_9BRAD	2	3-oxoacyl-[acyl-carrier-protein] reductase /acetoacetyl-CoA reductase OS=Rhodopseudomonas faecalis OX=99655 GN=BJ122_12153 PE=3 SV=1	3.36678	0.000559334
tr|A0A318T9K1|A0A318T9K1_9BRAD	3	3-oxoacyl-[acyl-carrier-protein] synthase I OS=Rhodopseudomonas faecalis OX=99655 GN=BJ122_12436 PE=3 SV=1	2.05973	0.0286167
tr|A0A318TML2|A0A318TML2_9BRAD	1	3-oxoacyl-[acyl-carrier-protein] synthase II OS=Rhodopseudomonas faecalis OX=99655 GN=BJ122_102326 PE=3 SV=1	2.60817	0.00276478
tr|A0A318TJU8|A0A318TJU8_9BRAD	1	4-hydroxy-tetrahydrodipicolinate reductase OS=Rhodopseudomonas faecalis OX=99655 GN=dapB PE=3 SV=1	2.77492	0.00218045
tr|D5ALY3|D5ALY3_RHOCB	1	50S ribosomal protein L1 OS=Rhodobacter capsulatus (strain ATCC BAA-309 / NBRC 16581 / SB1003) OX=272942 GN=rplA PE=3 SV=1	2.85043	0.00033073
tr|A0A318TPU3|A0A318TPU3_9BRAD	3	50S ribosomal protein L1 OS=Rhodopseudomonas faecalis OX=99655 GN=rplA PE=3 SV=1	2.17294	0.0115534
tr|A0A318TEP0|A0A318TEP0_9BRAD	2	50S ribosomal protein L10 OS=Rhodopseudomonas faecalis OX=99655 GN=rplJ PE=3 SV=1	5.07228	0.000240886
tr|A0A318TCU3|A0A318TCU3_9BRAD	1	50S ribosomal protein L11 OS=Rhodopseudomonas faecalis OX=99655 GN=rplK PE=3 SV=1	2.72503	1.66553e-05
tr|G2H5R6|G2H5R6_9DELT	1	50S ribosomal protein L13 OS=Desulfovibrio sp. A2 OX=298701 GN=rplM PE=3 SV=1	0.206136	0.0289975
tr|A0A679IS28|A0A679IS28_9ENTE	2	50S ribosomal protein L13 OS=Enterococcus saigonensis OX=1805431 GN=rplM PE=3 SV=1	0.393311	0.0266646
tr|A0A318TJ08|A0A318TJ08_9BRAD	3	50S ribosomal protein L13 OS=Rhodopseudomonas faecalis OX=99655 GN=rplM PE=3 SV=1	1.91698	0.0332983
tr|D5AM05|D5AM05_RHOCB	1	50S ribosomal protein L14 OS=Rhodobacter capsulatus (strain ATCC BAA-309 / NBRC 16581 / SB1003) OX=272942 GN=rplN PE=3 SV=1	3.83592	0.0320595
tr|A0A318TIH5|A0A318TIH5_9BRAD	2	50S ribosomal protein L14 OS=Rhodopseudomonas faecalis OX=99655 GN=rplN PE=3 SV=1	1.78195	0.0127364
tr|S7V7L5|S7V7L5_9DELT	1	50S ribosomal protein L15 OS=Desulfovibrio sp. X2 OX=941449 GN=rplO PE=3 SV=1	0.34435	0.0436737
tr|A0A318TAC7|A0A318TAC7_9BRAD	6	50S ribosomal protein L15 OS=Rhodopseudomonas faecalis OX=99655 GN=rplO PE=3 SV=1	2.3064	0.0181142
tr|A0A318TEL7|A0A318TEL7_9BRAD	3	50S ribosomal protein L16 OS=Rhodopseudomonas faecalis OX=99655 GN=rplP PE=3 SV=1	3.28397	0.00885346
tr|E6VBW3|E6VBW3_RHOPX	1	50S ribosomal protein L16 OS=Rhodopseudomonas palustris (strain DX-1) OX=652103 GN=rplP PE=3 SV=1	0.609455	0.0451973
tr|A0A318TCQ3|A0A318TCQ3_9BRAD	2	50S ribosomal protein L17 OS=Rhodopseudomonas faecalis OX=99655 GN=rplQ PE=3 SV=1	4.26145	0.0130455
sp|Q07KP3|RL17_RHOP5	1	50S ribosomal protein L17 OS=Rhodopseudomonas palustris (strain BisA53) OX=316055 GN=rplQ PE=3 SV=1	3.50666	0.00039158
tr|A0A318TPR3|A0A318TPR3_9BRAD	3	50S ribosomal protein L18 OS=Rhodopseudomonas faecalis OX=99655 GN=rplR PE=3 SV=1	2.7965	0.0149479
tr|A0A318TJT9|A0A318TJT9_9BRAD	1	50S ribosomal protein L19 OS=Rhodopseudomonas faecalis OX=99655 GN=rplS PE=3 SV=1	2.37694	0.000835782
tr|E6VJ05|E6VJ05_RHOPX	2	50S ribosomal protein L19 OS=Rhodopseudomonas palustris (strain DX-1) OX=652103 GN=rplS PE=3 SV=1	2.83572	0.00243303
tr|A0A413AQT4|A0A413AQT4_9ENTE	1	50S ribosomal protein L2 OS=Enterococcus asini OX=57732 GN=rplB PE=3 SV=1	0.398032	0.0116951
tr|A0A330HDR3|A0A330HDR3_9RHOB	3	50S ribosomal protein L2 OS=Rhodobacter johrii OX=445629 GN=rplB PE=3 SV=1	0.470056	0.0167808
tr|A0A318U3C7|A0A318U3C7_9RHOB	3	50S ribosomal protein L2 OS=Rhodobacter viridis OX=1054202 GN=rplB PE=3 SV=1	2.16446	0.0133657
tr|A0A318T909|A0A318T909_9BRAD	3	50S ribosomal protein L2 OS=Rhodopseudomonas faecalis OX=99655 GN=rplB PE=3 SV=1	3.14882	0.000663451
tr|A0A318TR50|A0A318TR50_9BRAD	3	50S ribosomal protein L20 OS=Rhodopseudomonas faecalis OX=99655 GN=rplT PE=3 SV=1	3.49717	0.00541274
tr|E6VF13|E6VF13_RHOPX	3	50S ribosomal protein L20 OS=Rhodopseudomonas palustris (strain DX-1) OX=652103 GN=rplT PE=3 SV=1	3.34921	0.00558141
tr|A0A318T9L8|A0A318T9L8_9BRAD	4	50S ribosomal protein L21 OS=Rhodopseudomonas faecalis OX=99655 GN=rplU PE=3 SV=1	2.18794	0.0426301
tr|S0NPN7|S0NPN7_9ENTE	2	50S ribosomal protein L22 OS=Enterococcus saccharolyticus subsp. saccharolyticus ATCC 43076 OX=1139996 GN=rplV PE=3 SV=1	0.496507	0.00887388
tr|A0A318TCS1|A0A318TCS1_9BRAD	1	50S ribosomal protein L22 OS=Rhodopseudomonas faecalis OX=99655 GN=rplV PE=3 SV=1	4.97077	0.00476693
tr|A0A0N0KRT6|A0A0N0KRT6_9ENTE	2	50S ribosomal protein L23 OS=Enterococcus sp. RIT-PI-f OX=1690244 GN=rplW PE=3 SV=1	0.519935	0.0179803
tr|A0A3G6WJI4|A0A3G6WJI4_RHOSH	2	50S ribosomal protein L23 OS=Rhodobacter sphaeroides OX=1063 GN=rplW PE=3 SV=1	0.348858	0.00223756
tr|A0A318TAK3|A0A318TAK3_9BRAD	1	50S ribosomal protein L23 OS=Rhodopseudomonas faecalis OX=99655 GN=rplW PE=3 SV=1	2.17912	0.0219455
tr|R2PL25|R2PL25_9ENTE	1	50S ribosomal protein L24 OS=Enterococcus asini ATCC 700915 OX=1158606 GN=rplX PE=3 SV=1	0.301347	0.0157213
tr|A0A318TA80|A0A318TA80_9BRAD	3	50S ribosomal protein L24 OS=Rhodopseudomonas faecalis OX=99655 GN=rplX PE=3 SV=1	4.00689	0.00413734
tr|A0A318TCP8|A0A318TCP8_9BRAD	9	50S ribosomal protein L25 OS=Rhodopseudomonas faecalis OX=99655 GN=rplY PE=3 SV=1	2.88819	0.00126337
tr|E6VQL6|E6VQL6_RHOPX	2	50S ribosomal protein L25 OS=Rhodopseudomonas palustris (strain DX-1) OX=652103 GN=rplY PE=3 SV=1	2.94237	0.0234916
tr|A0A318THV9|A0A318THV9_9BRAD	3	50S ribosomal protein L27 OS=Rhodopseudomonas faecalis OX=99655 GN=rpmA PE=3 SV=1	2.44197	0.039113
tr|A0A0Q0UF27|A0A0Q0UF27_RHOCA	1	50S ribosomal protein L28 OS=Rhodobacter capsulatus OX=1061 GN=rpmB PE=3 SV=1	0.174161	0.00463625
tr|A0A318T941|A0A318T941_9BRAD	3	50S ribosomal protein L28 OS=Rhodopseudomonas faecalis OX=99655 GN=rpmB PE=3 SV=1	3.22682	0.00995602
tr|A0A3F3LMU3|A0A3F3LMU3_ENTFC	2	50S ribosomal protein L29 OS=Enterococcus faecium OX=1352 GN=rpmC PE=3 SV=1	0.487939	0.0408698
tr|A0A318TCT5|A0A318TCT5_9BRAD	2	50S ribosomal protein L29 OS=Rhodopseudomonas faecalis OX=99655 GN=rpmC PE=3 SV=1	2.20355	0.00880553
tr|A0A0N8VEZ1|A0A0N8VEZ1_RHOCA	2	50S ribosomal protein L3 OS=Rhodobacter capsulatus OX=1061 GN=rplC PE=3 SV=1	2.97311	0.00920503
tr|A0A318TII5|A0A318TII5_9BRAD	3	50S ribosomal protein L3 OS=Rhodopseudomonas faecalis OX=99655 GN=rplC PE=3 SV=1	4.88912	0.000215622
tr|T0VJ73|T0VJ73_9ENTE	1	50S ribosomal protein L31 type B OS=Enterococcus sp. HSIEG1 OX=1316414 GN=rpmE2 PE=3 SV=1	0.231173	0.000311788
tr|A0A4Q0MW69|A0A4Q0MW69_9DELT	1	50S ribosomal protein L4 OS=Desulfovibrio sp. DS-1 OX=2497683 GN=rplD PE=3 SV=1	1.75074	0.0186803
tr|A0A318TA93|A0A318TA93_9BRAD	2	50S ribosomal protein L4 OS=Rhodopseudomonas faecalis OX=99655 GN=rplD PE=3 SV=1	2.25096	0.0322564
tr|A0A318TAJ1|A0A318TAJ1_9BRAD	2	50S ribosomal protein L5 OS=Rhodopseudomonas faecalis OX=99655 GN=rplE PE=3 SV=1	3.45883	0.0015839
tr|S1P191|S1P191_9ENTE	2	50S ribosomal protein L6 OS=Enterococcus dispar ATCC 51266 OX=1139219 GN=rplF PE=3 SV=1	0.369077	0.0196331
tr|A0A1G7FVM3|A0A1G7FVM3_RHOCA	2	50S ribosomal protein L6 OS=Rhodobacter capsulatus OX=1061 GN=rplF PE=3 SV=1	0.263348	0.0348384
tr|A0A318TCR3|A0A318TCR3_9BRAD	3	50S ribosomal protein L6 OS=Rhodopseudomonas faecalis OX=99655 GN=rplF PE=3 SV=1	3.17852	0.000465563
tr|A0A4Q0MSI2|A0A4Q0MSI2_9DELT	3	50S ribosomal protein L7/L12 OS=Desulfovibrio sp. DS-1 OX=2497683 GN=rplL PE=3 SV=1	0.214013	0.00177982
tr|A0A318THJ9|A0A318THJ9_9BRAD	5	50S ribosomal protein L9 OS=Rhodopseudomonas faecalis OX=99655 GN=rplI PE=3 SV=1	2.01683	0.00396403
tr|Q7M8B0|Q7M8B0_WOLSU	7	50S ribosomal subunit assembly factor BipA OS=Wolinella succinogenes (strain ATCC 29543 / DSM 1740 / LMG 7466 / NCTC 11488 / FDC 602W) OX=273121 GN=TYPA PE=3 SV=1	0.560768	0.0212199
tr|A0A318TU72|A0A318TU72_9BRAD	22	5-methyltetrahydropteroyltriglutamate--homocysteine methyltransferase OS=Rhodopseudomonas faecalis OX=99655 GN=metE PE=3 SV=1	3.88649	0.000328784
sp|Q7MAF0|RISB_WOLSU	2	6,7-dimethyl-8-ribityllumazine synthase OS=Wolinella succinogenes (strain ATCC 29543 / DSM 1740 / LMG 7466 / NCTC 11488 / FDC 602W) OX=273121 GN=ribH PE=3 SV=1	0.555179	0.0153512
tr|A0A4Y3TG22|A0A4Y3TG22_DESDE	1	60 kDa chaperonin OS=Desulfovibrio desulfuricans OX=876 GN=groL PE=3 SV=1	0.394467	0.0281641
tr|A0A388SM30|A0A388SM30_9DELT	5	60 kDa chaperonin OS=Desulfovibrio sp. HK-II OX=2009266 GN=groL PE=3 SV=1	0.497117	0.00798789
tr|S4ASU9|S4ASU9_ENTCA	4	60 kDa chaperonin OS=Enterococcus casseliflavus 14-MB-W-14 OX=1259825 GN=groL PE=3 SV=1	0.428397	0.0174037
tr|B9KPK0|B9KPK0_RHOSK	6	60 kDa chaperonin OS=Rhodobacter sphaeroides (strain KD131 / KCTC 12085) OX=557760 GN=groL PE=3 SV=1	2.08228	0.0198406
tr|A0A2S6NP97|A0A2S6NP97_RHOGL	2	60 kDa chaperonin OS=Rhodopila globiformis OX=1071 GN=groL PE=3 SV=1	2.82913	0.0456297
tr|A0A318TQK2|A0A318TQK2_9BRAD	3	60 kDa chaperonin OS=Rhodopseudomonas faecalis OX=99655 GN=groL PE=3 SV=1	3.38689	0.0122212
tr|A0A318TIB1|A0A318TIB1_9BRAD	6	60 kDa chaperonin OS=Rhodopseudomonas faecalis OX=99655 GN=groL PE=3 SV=1	3.15211	0.00742162
tr|A0A1H8VUG6|A0A1H8VUG6_9BRAD	1	60 kDa chaperonin OS=Rhodopseudomonas pseudopalustris OX=1513892 GN=groL PE=3 SV=1	2.95216	0.0122064
tr|F3LMI8|F3LMI8_9BURK	5	60 kDa chaperonin OS=Rubrivivax benzoatilyticus JA2 = ATCC BAA-35 OX=987059 GN=groL PE=3 SV=1	0.537581	0.038001
tr|A0A525CKI5|A0A525CKI5_9DELT	1	ABC transporter ATP-binding protein OS=Desulfovibrio sp. OX=885 GN=D6E12_01265 PE=4 SV=1	0.537969	0.01865
tr|U7U3L8|U7U3L8_ENTFC	1	ABC transporter ATP-binding protein OS=Enterococcus faecium 10/96A OX=1391465 GN=O991_00988 PE=4 SV=1	0.148878	0.00653016
tr|A0A2T4J3W1|A0A2T4J3W1_RHOBL	1	ABC transporter substrate-binding protein (Fragment) OS=Rhodobacter blasticus DSM 2131 OX=1188250 GN=C5F44_17555 PE=3 SV=1	0.294093	0.016234
tr|A0A7H0Y1G8|A0A7H0Y1G8_RHOCA	1	ABC transporter substrate-binding protein OS=Rhodobacter capsulatus OX=1061 GN=H9N28_10480 PE=4 SV=1	0.292289	0.0203097
tr|A0A7H0XTG4|A0A7H0XTG4_RHOCA	1	ABC transporter substrate-binding protein OS=Rhodobacter capsulatus OX=1061 GN=H9N28_11000 PE=3 SV=1	1.93281	0.0155481
tr|D5ATJ8|D5ATJ8_RHOCB	1	Acetolactate synthase OS=Rhodobacter capsulatus (strain ATCC BAA-309 / NBRC 16581 / SB1003) OX=272942 GN=ilvH PE=3 SV=1	0.394287	0.0158695
tr|A0A318TBZ1|A0A318TBZ1_9BRAD	7	Acetolactate synthase OS=Rhodopseudomonas faecalis OX=99655 GN=BJ122_1233 PE=3 SV=1	2.21914	0.0104617
tr|A0A318T8N2|A0A318T8N2_9BRAD	4	Acetyl-CoA acetyltransferase OS=Rhodopseudomonas faecalis OX=99655 GN=BJ122_12152 PE=3 SV=1	3.94278	0.00105614
tr|A0A7H0XVR5|A0A7H0XVR5_RHOCA	1	Acetyl-CoA C-acetyltransferase OS=Rhodobacter capsulatus OX=1061 GN=H9N28_15470 PE=3 SV=1	0.648284	0.0402517
tr|A0A318TKH3|A0A318TKH3_9BRAD	3	Acetyl-CoA synthetase OS=Rhodopseudomonas faecalis OX=99655 GN=BJ122_101120 PE=4 SV=1	0.380393	0.0365277
tr|A0A318TJ62|A0A318TJ62_9BRAD	7	Acetyl-coenzyme A synthetase OS=Rhodopseudomonas faecalis OX=99655 GN=acsA PE=3 SV=1	1.99503	0.00205524
tr|A0A7H0XS63|A0A7H0XS63_RHOCA	1	Aconitate hydratase OS=Rhodobacter capsulatus OX=1061 GN=acnA PE=3 SV=1	0.164062	0.047556
tr|A0A318TFG3|A0A318TFG3_9BRAD	1	Acyl carrier protein OS=Rhodopseudomonas faecalis OX=99655 GN=acpP PE=3 SV=1	2.74663	0.0439455
sp|Q7M9W1|ACP_WOLSU	1	Acyl carrier protein OS=Wolinella succinogenes (strain ATCC 29543 / DSM 1740 / LMG 7466 / NCTC 11488 / FDC 602W) OX=273121 GN=acpP PE=3 SV=1	0.30612	0.00248426
tr|A0A318TQH8|A0A318TQH8_9BRAD	1	Acyl-CoA dehydrogenase OS=Rhodopseudomonas faecalis OX=99655 GN=BJ122_11631 PE=3 SV=1	4.9262	9.72061e-05
tr|A0A318TNF5|A0A318TNF5_9BRAD	2	Acyl-CoA hydrolase OS=Rhodopseudomonas faecalis OX=99655 GN=BJ122_101149 PE=3 SV=1	2.29153	0.0246785
tr|A0A318TGH0|A0A318TGH0_9BRAD	1	Acyl-CoA thioesterase FadM OS=Rhodopseudomonas faecalis OX=99655 GN=BJ122_106117 PE=4 SV=1	5.85711	0.000319629
tr|A0A3G6WK15|A0A3G6WK15_RHOSH	1	Adenine phosphoribosyltransferase OS=Rhodobacter sphaeroides OX=1063 GN=apt PE=3 SV=1	3.08798	0.00357371
tr|A0A0Q0VD10|A0A0Q0VD10_RHOCA	4	Adenosylhomocysteinase OS=Rhodobacter capsulatus OX=1061 GN=ahcY PE=3 SV=1	1.71698	0.0374338
tr|A0A318T8E0|A0A318T8E0_9BRAD	9	Adenosylhomocysteinase OS=Rhodopseudomonas faecalis OX=99655 GN=ahcY PE=3 SV=1	1.98858	0.000589035
tr|A0A318TA69|A0A318TA69_9BRAD	3	Adenylate kinase OS=Rhodopseudomonas faecalis OX=99655 GN=adk PE=3 SV=1	1.69008	0.0378159
tr|A0A4U1JLV9|A0A4U1JLV9_RHOCA	1	Adenylosuccinate synthetase OS=Rhodobacter capsulatus OX=1061 GN=purA PE=3 SV=1	2.68826	0.00441886
sp|Q7M7V8|PURA_WOLSU	3	Adenylosuccinate synthetase OS=Wolinella succinogenes (strain ATCC 29543 / DSM 1740 / LMG 7466 / NCTC 11488 / FDC 602W) OX=273121 GN=purA PE=3 SV=1	0.499953	0.04856
tr|A0A318TJR7|A0A318TJR7_9BRAD	2	AhpD family alkylhydroperoxidase OS=Rhodopseudomonas faecalis OX=99655 GN=BJ122_10427 PE=4 SV=1	2.29761	0.0104689
tr|A0A1G7FDY8|A0A1G7FDY8_RHOCA	1	Alanine dehydrogenase OS=Rhodobacter capsulatus OX=1061 GN=SAMN04244550_00953 PE=3 SV=1	3.75155	0.0121673
tr|Q7M866|Q7M866_WOLSU	7	ALDEHYDE FERREDOXIN OXIDOREDUCTASE OS=Wolinella succinogenes (strain ATCC 29543 / DSM 1740 / LMG 7466 / NCTC 11488 / FDC 602W) OX=273121 GN=WS1844 PE=3 SV=1	0.871308	0.0257863
tr|B8DK02|B8DK02_DESVM	6	Aldehyde oxidase and xanthine dehydrogenase molybdopterin binding OS=Desulfovibrio vulgaris (strain Miyazaki F / DSM 19637) OX=883 GN=DvMF_0641 PE=3 SV=1	3.66447	0.0156394
tr|R2NKD2|R2NKD2_9ENTE	3	Aldehyde-alcohol dehydrogenase OS=Enterococcus malodoratus ATCC 43197 OX=1158601 GN=UAI_04082 PE=3 SV=1	0.221203	0.0160933
tr|D4ZJZ6|D4ZJZ6_SHEVD	1	Aldehyde-alcohol dehydrogenase OS=Shewanella violacea (strain JCM 10179 / CIP 106290 / LMG 19151 / DSS12) OX=637905 GN=adhE PE=3 SV=1	0.370155	0.00871858
tr|A0A318TG50|A0A318TG50_9BRAD	1	Alpha-ketoglutarate dehydrogenase OS=Rhodopseudomonas faecalis OX=99655 GN=BJ122_11423 PE=3 SV=1	3.45636	0.00927353
tr|A0A318TLN8|A0A318TLN8_9BRAD	13	Amino acid ABC transporter substrate-binding protein (PAAT family) OS=Rhodopseudomonas faecalis OX=99655 GN=BJ122_101318 PE=3 SV=1	1.42843	0.0442955
tr|A0A318TL13|A0A318TL13_9BRAD	2	Amino acid/amide ABC transporter ATP-binding protein 1 (HAAT family) OS=Rhodopseudomonas faecalis OX=99655 GN=BJ122_103171 PE=4 SV=1	0.359951	0.000860462
tr|A0A318TIK0|A0A318TIK0_9BRAD	7	Amino acid/amide ABC transporter substrate-binding protein (HAAT family) OS=Rhodopseudomonas faecalis OX=99655 GN=BJ122_103168 PE=4 SV=1	2.19056	0.0202921
tr|A0A318T9V8|A0A318T9V8_9BRAD	7	Amino acid/amide ABC transporter substrate-binding protein (HAAT family) OS=Rhodopseudomonas faecalis OX=99655 GN=BJ122_12272 PE=4 SV=1	2.07299	0.0128392
tr|A0A318T8Z8|A0A318T8Z8_9BRAD	5	Amino acid/amide ABC transporter substrate-binding protein (HAAT family) OS=Rhodopseudomonas faecalis OX=99655 GN=BJ122_12633 PE=4 SV=1	3.07209	0.000661817
tr|A0A318TC38|A0A318TC38_9BRAD	5	Anaerobic Mg-protoporphyrin IX monomethyl ester oxidative cyclase OS=Rhodopseudomonas faecalis OX=99655 GN=BJ122_1119 PE=4 SV=1	2.17583	0.0129992
sp|Q7MAC9|ARGJ_WOLSU	1	Arginine biosynthesis bifunctional protein ArgJ OS=Wolinella succinogenes (strain ATCC 29543 / DSM 1740 / LMG 7466 / NCTC 11488 / FDC 602W) OX=273121 GN=argJ PE=3 SV=1	0.227704	0.0309529
tr|A0A318T7P5|A0A318T7P5_9BRAD	1	Argininosuccinate lyase OS=Rhodopseudomonas faecalis OX=99655 GN=argH PE=3 SV=1	3.30727	0.00257889
tr|Q7MAU2|Q7MAU2_WOLSU	1	ASPARTATE AMINOTRANSFERASE OS=Wolinella succinogenes (strain ATCC 29543 / DSM 1740 / LMG 7466 / NCTC 11488 / FDC 602W) OX=273121 GN=WS0024 PE=3 SV=1	0.536115	0.0487887
tr|S0NR73|S0NR73_9ENTE	1	Aspartyl/glutamyl-tRNA(Asn/Gln) amidotransferase subunit B OS=Enterococcus sulfureus ATCC 49903 OX=1140003 GN=gatB PE=3 SV=1	0.0837791	0.0311865
tr|A0A7H0XV71|A0A7H0XV71_RHOCA	1	ATP synthase epsilon chain OS=Rhodobacter capsulatus OX=1061 GN=atpC PE=3 SV=1	1.79676	0.0157886
tr|A0A318T9D8|A0A318T9D8_9BRAD	2	ATP synthase epsilon chain OS=Rhodopseudomonas faecalis OX=99655 GN=atpC PE=3 SV=1	2.44222	0.0317703
tr|A0A318T966|A0A318T966_9BRAD	6	ATP synthase gamma chain OS=Rhodopseudomonas faecalis OX=99655 GN=atpG PE=3 SV=1	2.28732	0.0145324
tr|A0A330HGA9|A0A330HGA9_9RHOB	2	ATP synthase subunit alpha OS=Rhodobacter johrii OX=445629 GN=atpA PE=3 SV=1	1.38184	0.0215071
tr|A0A318T9I3|A0A318T9I3_9BRAD	6	ATP synthase subunit alpha OS=Rhodopseudomonas faecalis OX=99655 GN=atpA PE=3 SV=1	2.57534	0.00441523
tr|A0A330HBV3|A0A330HBV3_9RHOB	1	ATP synthase subunit b OS=Rhodobacter johrii OX=445629 GN=atpF PE=3 SV=1	2.37958	0.0225324
tr|A0A179ER42|A0A179ER42_ENTTH	2	ATP synthase subunit beta OS=Enterococcus thailandicus OX=417368 GN=atpD PE=3 SV=1	1.73888	0.000876963
tr|A0A0Q0QUZ8|A0A0Q0QUZ8_RHOCA	1	ATP synthase subunit beta OS=Rhodobacter capsulatus OX=1061 GN=atpD PE=3 SV=1	5.15861	0.0424519
tr|A0A318THG8|A0A318THG8_9BRAD	8	ATP synthase subunit beta OS=Rhodopseudomonas faecalis OX=99655 GN=atpD PE=3 SV=1	2.89425	0.0153338
tr|A0A318T7X4|A0A318T7X4_9BRAD	1	ATP-dependent RNA helicase SUPV3L1/SUV3 OS=Rhodopseudomonas faecalis OX=99655 GN=BJ122_12535 PE=4 SV=1	2.95989	0.00939272
tr|S4D1G9|S4D1G9_ENTFL	2	ATP-dependent zinc metalloprotease FtsH OS=Enterococcus faecalis 13-SD-W-01 OX=1260356 GN=ftsH PE=3 SV=1	0.33339	0.0351478
tr|Q72C87|Q72C87_DESVH	1	Bacterioferritin OS=Desulfovibrio vulgaris (strain Hildenborough / ATCC 29579 / DSM 644 / NCIMB 8303) OX=882 GN=bfr PE=1 SV=1	0.174262	0.00516145
tr|A0A318T7H8|A0A318T7H8_9BRAD	2	Beta sliding clamp OS=Rhodopseudomonas faecalis OX=99655 GN=BJ122_1298 PE=3 SV=1	0.423038	0.00266802
tr|A0A318TL38|A0A318TL38_9BRAD	1	Beta-ketodecanoyl-[acyl-carrier-protein] synthase OS=Rhodopseudomonas faecalis OX=99655 GN=BJ122_103202 PE=4 SV=1	2.18181	0.0031472
tr|A0A318TQC0|A0A318TQC0_9BRAD	1	Bifunctional enzyme IspD/IspF OS=Rhodopseudomonas faecalis OX=99655 GN=ispDF PE=3 SV=1	0.298667	0.000819879
tr|Q7MAG1|Q7MAG1_WOLSU	2	BINDING PROTEIN COMPONENT ABC TRANSPORTER OS=Wolinella succinogenes (strain ATCC 29543 / DSM 1740 / LMG 7466 / NCTC 11488 / FDC 602W) OX=273121 GN=WS0278 PE=3 SV=1	0.416364	0.0384982
tr|Q7M999|Q7M999_WOLSU	2	Biotin carboxyl carrier protein of acetyl-CoA carboxylase OS=Wolinella succinogenes (strain ATCC 29543 / DSM 1740 / LMG 7466 / NCTC 11488 / FDC 602W) OX=273121 GN=ACCB PE=4 SV=1	0.208594	0.0132674
tr|A0A7H0XYX8|A0A7H0XYX8_RHOCA	4	BMP family ABC transporter substrate-binding protein OS=Rhodobacter capsulatus OX=1061 GN=H9N28_04130 PE=4 SV=1	1.83461	0.0249023
tr|A0A2T4JA45|A0A2T4JA45_RHOBL	1	Branched-chain amino acid ABC transporter substrate-binding protein OS=Rhodobacter blasticus DSM 2131 OX=1188250 GN=C5F44_08220 PE=4 SV=1	2.25688	0.036978
tr|Q7MAQ7|Q7MAQ7_WOLSU	2	Branched-chain-amino-acid aminotransferase OS=Wolinella succinogenes (strain ATCC 29543 / DSM 1740 / LMG 7466 / NCTC 11488 / FDC 602W) OX=273121 GN=ILVE PE=3 SV=1	0.535232	0.0262311
tr|A0A318TKC9|A0A318TKC9_9BRAD	12	C4-dicarboxylate-binding protein DctP OS=Rhodopseudomonas faecalis OX=99655 GN=BJ122_1018 PE=3 SV=1	1.98733	0.000562209
tr|Q7MSR2|Q7MSR2_WOLSU	4	CADF OS=Wolinella succinogenes (strain ATCC 29543 / DSM 1740 / LMG 7466 / NCTC 11488 / FDC 602W) OX=273121 GN=CADF PE=4 SV=1	0.428901	0.0375311
tr|A0A318TL28|A0A318TL28_9BRAD	1	Carbamoyl-phosphate synthase large chain OS=Rhodopseudomonas faecalis OX=99655 GN=carB PE=3 SV=1	0.530064	0.00860411
tr|A0A318TTZ2|A0A318TTZ2_9BRAD	1	Carbonic anhydrase/acetyltransferase-like protein (Isoleucine patch superfamily) OS=Rhodopseudomonas faecalis OX=99655 GN=BJ122_10173 PE=4 SV=1	2.52404	0.000184064
tr|A0A388SFP1|A0A388SFP1_9DELT	1	Catalase OS=Desulfovibrio sp. HK-II OX=2009266 GN=RVX_0149 PE=3 SV=1	0.720423	0.0391764
tr|A0A318TA91|A0A318TA91_9BRAD	1	CBS domain protein OS=Rhodopseudomonas faecalis OX=99655 GN=BJ122_11562 PE=4 SV=1	3.9999	0.0146943
tr|Q7M902|Q7M902_WOLSU	5	CELL BINDING FACTOR 2 MAJOR ANTIGEN PEB4A OS=Wolinella succinogenes (strain ATCC 29543 / DSM 1740 / LMG 7466 / NCTC 11488 / FDC 602W) OX=273121 GN=WS1281 PE=4 SV=1	0.521078	0.00537388
tr|Q7M850|Q7M850_WOLSU	1	Cell division inhibitor MinD OS=Wolinella succinogenes (strain ATCC 29543 / DSM 1740 / LMG 7466 / NCTC 11488 / FDC 602W) OX=273121 GN=MIND PE=3 SV=1	0.435197	0.0290653
tr|S0KPM7|S0KPM7_9ENTE	1	Cell division protein FtsA OS=Enterococcus dispar ATCC 51266 OX=1139219 GN=ftsA PE=3 SV=1	0.253917	0.0286271
tr|A0A1L8QRZ3|A0A1L8QRZ3_9ENTE	1	Cell division protein FtsZ OS=Enterococcus aquimarinus OX=328396 GN=ftsZ PE=3 SV=1	0.266687	0.0175944
tr|A0A318T9R0|A0A318T9R0_9BRAD	1	Cell division protein FtsZ OS=Rhodopseudomonas faecalis OX=99655 GN=ftsZ PE=3 SV=1	2.29075	0.0286938
tr|A0A318TE80|A0A318TE80_9BRAD	1	Chaperone protein DnaJ OS=Rhodopseudomonas faecalis OX=99655 GN=dnaJ PE=3 SV=1	2.64895	0.0477987
tr|A0A200JA14|A0A200JA14_9ENTE	1	Chaperone protein DnaK OS=Enterococcus sp. 9D6_DIV0238 OX=1834192 GN=dnaK PE=2 SV=1	0.20071	0.0083345
tr|A0A0Q0VHT0|A0A0Q0VHT0_RHOCA	2	Chaperone protein DnaK OS=Rhodobacter capsulatus OX=1061 GN=dnaK PE=2 SV=1	2.17164	0.00192419
tr|A0A318TB09|A0A318TB09_9BRAD	2	Chaperone protein DnaK OS=Rhodopseudomonas faecalis OX=99655 GN=dnaK PE=2 SV=1	2.84513	0.00374963
tr|Q7M7U2|Q7M7U2_WOLSU	3	CHEMOTAXIS PROTEIN EC 2.7.3 OS=Wolinella succinogenes (strain ATCC 29543 / DSM 1740 / LMG 7466 / NCTC 11488 / FDC 602W) OX=273121 GN=CHEV PE=4 SV=1	0.460864	0.00146983
tr|A0A318TFZ6|A0A318TFZ6_9BRAD	3	Chlorophyllide reductase iron protein subunit X OS=Rhodopseudomonas faecalis OX=99655 GN=BJ122_110114 PE=3 SV=1	1.85649	0.0190302
tr|A0A318TI74|A0A318TI74_9BRAD	1	Chlorophyllide reductase subunit Y OS=Rhodopseudomonas faecalis OX=99655 GN=BJ122_110115 PE=4 SV=1	3.64591	0.0302326
tr|A0A318TC70|A0A318TC70_9BRAD	1	Chromosome partitioning protein OS=Rhodopseudomonas faecalis OX=99655 GN=BJ122_11139 PE=4 SV=1	0.154812	0.0145179
tr|A0A318TKR2|A0A318TKR2_9BRAD	4	Citrate synthase OS=Rhodopseudomonas faecalis OX=99655 GN=BJ122_101151 PE=3 SV=1	4.54744	0.000366577
tr|A0A318TLX9|A0A318TLX9_9BRAD	5	Citrate synthase OS=Rhodopseudomonas faecalis OX=99655 GN=BJ122_101226 PE=3 SV=1	2.40316	0.00173055
tr|A0A318TGG6|A0A318TGG6_9BRAD	1	Cobyric acid synthase OS=Rhodopseudomonas faecalis OX=99655 GN=cobQ PE=3 SV=1	2.23025	0.000117587
tr|Q21AW7|Q21AW7_RHOPB	1	Cold-shock DNA-binding protein family OS=Rhodopseudomonas palustris (strain BisB18) OX=316056 GN=RPC_0899 PE=4 SV=1	2.78429	0.00914032
tr|A0A318TND8|A0A318TND8_9BRAD	1	CreA protein OS=Rhodopseudomonas faecalis OX=99655 GN=BJ122_101129 PE=4 SV=1	1.3905	0.0157262
tr|Q7M958|Q7M958_WOLSU	4	Cysteine synthase OS=Wolinella succinogenes (strain ATCC 29543 / DSM 1740 / LMG 7466 / NCTC 11488 / FDC 602W) OX=273121 GN=WS1188 PE=3 SV=1	1.52357	0.00658052
tr|Q7MS72|Q7MS72_WOLSU	1	Cytochrome c domain-containing protein OS=Wolinella succinogenes (strain ATCC 29543 / DSM 1740 / LMG 7466 / NCTC 11488 / FDC 602W) OX=273121 GN=WS0700 PE=4 SV=1	0.372296	0.043028
tr|A0A330H6E2|A0A330H6E2_9RHOB	2	Cytochrome c OS=Rhodobacter johrii OX=445629 GN=DDV93_20145 PE=4 SV=1	0.409362	0.000308125
tr|A0A318TD31|A0A318TD31_9BRAD	6	Cytochrome c OS=Rhodopseudomonas faecalis OX=99655 GN=BJ122_110128 PE=4 SV=1	4.45969	0.000976225
tr|F3LR89|F3LR89_9BURK	1	Cytochrome c prime OS=Rubrivivax benzoatilyticus JA2 = ATCC BAA-35 OX=987059 GN=RBXJA2T_11046 PE=4 SV=1	0.479427	0.00231186
tr|A0A7H0XUS3|A0A7H0XUS3_RHOCA	4	Cytochrome c1 OS=Rhodobacter capsulatus OX=1061 GN=H9N28_13620 PE=4 SV=1	1.28504	0.0278449
tr|A0A0Q0QW64|A0A0Q0QW64_RHOCA	1	Cytochrome c556 OS=Rhodobacter capsulatus OX=1061 GN=SAMN04244550_02505 PE=4 SV=1	10.3776	0.0335177
tr|A0A330HCS0|A0A330HCS0_9RHOB	1	Cytochrome-c oxidase, cbb3-type subunit II OS=Rhodobacter johrii OX=445629 GN=ccoO PE=4 SV=1	0.541933	0.0283478
tr|A0A318T9W3|A0A318T9W3_9BRAD	7	Cytochrome-dependent sulfide dehydrogenase (Flavoprotein) OS=Rhodopseudomonas faecalis OX=99655 GN=BJ122_11654 PE=4 SV=1	3.81703	0.0192571
tr|Q6N1U6|Q6N1U6_RHOPA	1	D-3-phosphoglycerate dehydrogenase OS=Rhodopseudomonas palustris (strain ATCC BAA-98 / CGA009) OX=258594 GN=serA2 PE=3 SV=1	2.41373	0.0155733
tr|A0A3S0IQ96|A0A3S0IQ96_9GAMM	1	DctA-YdbH domain-containing protein OS=Shewanella canadensis OX=271096 GN=EKG38_07140 PE=4 SV=1	3.16726	0.0296536
tr|G2H9X7|G2H9X7_9DELT	1	DEAD/DEAH box helicase family protein OS=Desulfovibrio sp. A2 OX=298701 GN=DA2_2438 PE=3 SV=1	0.276499	0.0477851
tr|A0A318TPG9|A0A318TPG9_9BRAD	7	Delta-aminolevulinic acid dehydratase OS=Rhodopseudomonas faecalis OX=99655 GN=BJ122_10562 PE=3 SV=1	1.96962	0.00854379
tr|A0A7C9NSZ0|A0A7C9NSZ0_RHOSU	1	Delta-aminolevulinic acid dehydratase OS=Rhodovulum sulfidophilum OX=35806 GN=hemB PE=3 SV=1	3.56459	5.35728e-06
tr|A0A4Q0MS37|A0A4Q0MS37_9DELT	1	Desulfoferrodoxin OS=Desulfovibrio sp. DS-1 OX=2497683 GN=EKK70_13915 PE=3 SV=1	0.155859	0.00378037
tr|O86965|O86965_9DELT	1	Dissimilatory sulfite reductase beta subunit (Fragment) OS=Desulfovibrio sp. PT-2 OX=77909 GN=dsrB PE=4 SV=2	2.38093	0.0330551
tr|A0A3D1U645|A0A3D1U645_9DELT	1	Dissimilatory-type sulfite reductase subunit alpha OS=Desulfovibrio sp. OX=885 GN=dsrA PE=4 SV=1	3.17383	0.0119295
tr|Q7MAV1|Q7MAV1_WOLSU	3	DNA gyrase subunit B OS=Wolinella succinogenes (strain ATCC 29543 / DSM 1740 / LMG 7466 / NCTC 11488 / FDC 602W) OX=273121 GN=gyrB PE=3 SV=1	0.742054	0.0349056
tr|R2RLQ5|R2RLQ5_9ENTE	1	DNA protection during starvation protein 1 OS=Enterococcus malodoratus ATCC 43197 OX=1158601 GN=UAI_02569 PE=3 SV=1	0.318018	0.0340976
tr|D5ALF8|D5ALF8_RHOCB	1	DNA-binding protein HU-1 OS=Rhodobacter capsulatus (strain ATCC BAA-309 / NBRC 16581 / SB1003) OX=272942 GN=hup1 PE=3 SV=1	4.86786	0.00526303
tr|A0A318TNI3|A0A318TNI3_9BRAD	2	DNA-binding protein HU-beta OS=Rhodopseudomonas faecalis OX=99655 GN=BJ122_101182 PE=3 SV=1	4.04972	0.00682282
tr|D5AM21|D5AM21_RHOCB	2	DNA-directed RNA polymerase subunit alpha OS=Rhodobacter capsulatus (strain ATCC BAA-309 / NBRC 16581 / SB1003) OX=272942 GN=rpoA PE=3 SV=1	1.46063	0.0201806
tr|A0A3G6WJQ7|A0A3G6WJQ7_RHOSH	1	DNA-directed RNA polymerase subunit alpha OS=Rhodobacter sphaeroides OX=1063 GN=rpoA PE=3 SV=1	0.607715	0.0167689
tr|A0A318T985|A0A318T985_9BRAD	2	DNA-directed RNA polymerase subunit alpha OS=Rhodopseudomonas faecalis OX=99655 GN=rpoA PE=3 SV=1	3.44538	0.000250004
tr|A0A4Q0MSN2|A0A4Q0MSN2_9DELT	2	DNA-directed RNA polymerase subunit beta' OS=Desulfovibrio sp. DS-1 OX=2497683 GN=rpoC PE=3 SV=1	0.475183	0.0237213
tr|U6S011|U6S011_ENTFL	1	DNA-directed RNA polymerase subunit beta OS=Enterococcus faecalis VC1B-1 OX=1244143 GN=rpoB PE=3 SV=1	0.405194	0.00506084
tr|A0A4U1JS31|A0A4U1JS31_RHOCA	2	DNA-directed RNA polymerase subunit beta' OS=Rhodobacter capsulatus OX=1061 GN=rpoC PE=3 SV=1	0.387647	8.8081e-05
tr|A0A318TAF9|A0A318TAF9_9BRAD	18	DNA-directed RNA polymerase subunit beta OS=Rhodopseudomonas faecalis OX=99655 GN=rpoB PE=3 SV=1	1.71757	0.0293185
tr|A0A318TIX4|A0A318TIX4_9BRAD	2	DNA-directed RNA polymerase subunit omega OS=Rhodopseudomonas faecalis OX=99655 GN=rpoZ PE=3 SV=1	2.51317	0.0142415
tr|A0A318TCL3|A0A318TCL3_9BRAD	2	dTDP-4-amino-4,6-dideoxygalactose transaminase OS=Rhodopseudomonas faecalis OX=99655 GN=BJ122_12043 PE=3 SV=1	2.15784	0.00435735
tr|Q7MSV2|Q7MSV2_WOLSU	1	DUF4405 domain-containing protein OS=Wolinella succinogenes (strain ATCC 29543 / DSM 1740 / LMG 7466 / NCTC 11488 / FDC 602W) OX=273121 GN=CYTB PE=4 SV=1	2.15612	0.0146411
tr|A0A318T8U6|A0A318T8U6_9BRAD	4	Electron transfer flavoprotein alpha subunit apoprotein OS=Rhodopseudomonas faecalis OX=99655 GN=BJ122_12829 PE=3 SV=1	3.39256	0.00196172
tr|A0A318TGZ8|A0A318TGZ8_9BRAD	8	Electron transfer flavoprotein beta subunit OS=Rhodopseudomonas faecalis OX=99655 GN=BJ122_12828 PE=3 SV=1	2.04976	0.0442252
tr|A0A318TGV4|A0A318TGV4_9BRAD	3	Electron transfer flavoprotein-ubiquinone oxidoreductase OS=Rhodopseudomonas faecalis OX=99655 GN=BJ122_10479 PE=4 SV=1	1.70868	0.0242893
tr|A0A4Q0MW04|A0A4Q0MW04_9DELT	3	Elongation factor G OS=Desulfovibrio sp. DS-1 OX=2497683 GN=fusA PE=3 SV=1	0.46518	0.0315173
tr|A0A7H0XXI4|A0A7H0XXI4_RHOCA	3	Elongation factor G OS=Rhodobacter capsulatus OX=1061 GN=fusA PE=3 SV=1	1.34008	0.036625
tr|A0A318TPT2|A0A318TPT2_9BRAD	12	Elongation factor G OS=Rhodopseudomonas faecalis OX=99655 GN=fusA PE=3 SV=1	2.20109	0.0012431
tr|A0A094JD08|A0A094JD08_9GAMM	1	Elongation factor G OS=Shewanella mangrovi OX=1515746 GN=fusA PE=3 SV=1	2.81042	0.0203832
tr|A0A318TEY1|A0A318TEY1_9BRAD	4	Elongation factor P OS=Rhodopseudomonas faecalis OX=99655 GN=efp PE=3 SV=1	2.5775	0.00242655
tr|A0A418V151|A0A418V151_RHOPL	2	Elongation factor P OS=Rhodopseudomonas palustris OX=1076 GN=efp PE=3 SV=1	2.03876	0.0478378
tr|E6LGW7|E6LGW7_ENTI1	2	Elongation factor Ts OS=Enterococcus italicus (strain DSM 15952 / LMG 22039 / TP 1.5) OX=888064 GN=tsf PE=3 SV=1	0.390756	0.0140358
tr|A0A318TNL6|A0A318TNL6_9BRAD	9	Elongation factor Ts OS=Rhodopseudomonas faecalis OX=99655 GN=tsf PE=3 SV=1	2.90101	0.00170182
sp|Q7MAK1|EFTS_WOLSU	8	Elongation factor Ts OS=Wolinella succinogenes (strain ATCC 29543 / DSM 1740 / LMG 7466 / NCTC 11488 / FDC 602W) OX=273121 GN=tsf PE=3 SV=1	0.644868	0.0311726
tr|A0A173UAH1|A0A173UAH1_9BACT	1	Elongation factor Tu OS=Parabacteroides distasonis OX=823 GN=tuf PE=3 SV=1	0.103385	0.011525
tr|A0A318TPV2|A0A318TPV2_9BRAD	6	Elongation factor Tu OS=Rhodopseudomonas faecalis OX=99655 GN=tuf PE=3 SV=1	3.22685	0.00160614
tr|E6VBT0|E6VBT0_RHOPX	1	Elongation factor Tu OS=Rhodopseudomonas palustris (strain DX-1) OX=652103 GN=tuf PE=3 SV=1	3.68093	0.00245143
tr|A0A4R2F7E0|A0A4R2F7E0_9GAMM	1	Elongation factor Tu OS=Shewanella fodinae OX=552357 GN=tuf PE=3 SV=1	0.381389	0.00747426
tr|A0A3G6WLM5|A0A3G6WLM5_RHOSH	7	Enolase OS=Rhodobacter sphaeroides OX=1063 GN=eno PE=3 SV=1	0.787069	0.0368546
tr|A0A318TM06|A0A318TM06_9BRAD	2	Enolase OS=Rhodopseudomonas faecalis OX=99655 GN=eno PE=3 SV=1	3.19568	0.00895046
sp|Q07ND9|ENO_RHOP5	1	Enolase OS=Rhodopseudomonas palustris (strain BisA53) OX=316055 GN=eno PE=3 SV=1	3.67959	0.0066946
tr|A0A1D9MAQ9|A0A1D9MAQ9_9RHOB	1	Enoyl-[acyl-carrier-protein] reductase [NADH] OS=Rhodobacter sp. LPB0142 OX=1850250 GN=LPB142_05320 PE=3 SV=1	2.81881	0.00876476
tr|A0A318TLU6|A0A318TLU6_9BRAD	1	Enoyl-CoA hydratase OS=Rhodopseudomonas faecalis OX=99655 GN=BJ122_10262 PE=3 SV=1	2.80992	0.0316115
tr|A0A0Q0VIF7|A0A0Q0VIF7_RHOCA	2	Erythritol transport system substrate-binding protein OS=Rhodobacter capsulatus OX=1061 GN=SAMN04244550_02480 PE=4 SV=1	2.12292	0.0230495
tr|S0KNS3|S0KNS3_9ENTE	2	Extracellular solute-binding protein OS=Enterococcus dispar ATCC 51266 OX=1139219 GN=OMK_01757 PE=4 SV=1	0.491929	0.0172594
tr|B8DMG2|B8DMG2_DESVM	2	FAD linked oxidase domain protein OS=Desulfovibrio vulgaris (strain Miyazaki F / DSM 19637) OX=883 GN=DvMF_1862 PE=4 SV=1	0.237409	0.0305761
tr|I0HQH7|I0HQH7_RUBGI	1	FAD:protein FMN transferase OS=Rubrivivax gelatinosus (strain NBRC 100245 / IL144) OX=983917 GN=nosX PE=3 SV=1	0.350668	0.00286489
tr|A0A318TSQ0|A0A318TSQ0_9BRAD	1	Ferritin-like metal-binding protein YciE OS=Rhodopseudomonas faecalis OX=99655 GN=BJ122_102100 PE=4 SV=1	5.13249	0.00150396
tr|A0A318TPC7|A0A318TPC7_9BRAD	3	Fe-S cluster biogenesis protein NfuA OS=Rhodopseudomonas faecalis OX=99655 GN=BJ122_12119 PE=4 SV=1	2.61083	0.00463403
tr|A0A318T9A3|A0A318T9A3_9BRAD	2	Fis family two component transcriptional regulator OS=Rhodopseudomonas faecalis OX=99655 GN=BJ122_12457 PE=4 SV=1	3.87403	0.00842991
sp|Q7MR59|FLIW1_WOLSU	1	Flagellar assembly factor FliW 1 OS=Wolinella succinogenes (strain ATCC 29543 / DSM 1740 / LMG 7466 / NCTC 11488 / FDC 602W) OX=273121 GN=fliW1 PE=3 SV=1	0.680984	0.0381212
tr|B8DS31|B8DS31_DESVM	1	Flagellin OS=Desulfovibrio vulgaris (strain Miyazaki F / DSM 19637) OX=883 GN=DvMF_1622 PE=3 SV=1	1.94021	0.0237498
tr|Q7M7N1|Q7M7N1_WOLSU	2	Flagellin OS=Wolinella succinogenes (strain ATCC 29543 / DSM 1740 / LMG 7466 / NCTC 11488 / FDC 602W) OX=273121 GN=FLAB PE=3 SV=1	0.436868	0.00231308
tr|Q7MAP0|Q7MAP0_WOLSU	12	FLAVOCYTOCHROME C FLAVIN SUBUNIT OS=Wolinella succinogenes (strain ATCC 29543 / DSM 1740 / LMG 7466 / NCTC 11488 / FDC 602W) OX=273121 GN=FCCA PE=3 SV=1	0.586712	0.00327957
tr|A0A511IZQ9|A0A511IZQ9_9ENTE	1	Flavocytochrome c OS=Enterococcus villorum OX=112904 GN=EVI01_05710 PE=3 SV=1	0.293001	0.00494707
tr|I6S941|I6S941_ENTHA	1	Flavodoxin OS=Enterococcus hirae (strain ATCC 9790 / DSM 20160 / JCM 8729 / LMG 6399 / NBRC 3181 / NCIMB 6459 / NCDO 1258) OX=768486 GN=EHR_00230 PE=3 SV=1	0.290616	0.000295697
tr|T0VJR3|T0VJR3_9ENTE	1	Formate--tetrahydrofolate ligase OS=Enterococcus sp. HSIEG1 OX=1316414 GN=fhs PE=3 SV=1	0.416952	0.00986211
tr|Q3J0V6|Q3J0V6_RHOS4	1	Fructose-1,6-bisphosphatase OS=Rhodobacter sphaeroides (strain ATCC 17023 / 2.4.1 / NCIB 8253 / DSM 158) OX=272943 GN=RSP_0404 PE=3 SV=1	2.61151	0.00195149
tr|Q07N62|Q07N62_RHOP5	1	Fructose-1,6-bisphosphate aldolase OS=Rhodopseudomonas palustris (strain BisA53) OX=316055 GN=RPE_2685 PE=3 SV=1	4.07121	0.000231331
sp|P17413|FRDC_WOLSU	2	Fumarate reductase cytochrome b subunit OS=Wolinella succinogenes (strain ATCC 29543 / DSM 1740 / LMG 7466 / NCTC 11488 / FDC 602W) OX=273121 GN=frdC PE=1 SV=1	0.53664	0.0333301
tr|J8ZRE1|J8ZRE1_ENTFC	1	Fumarate reductase flavoprotein subunit OS=Enterococcus faecium TX1337RF OX=1134802 GN=HMPREF1345_00183 PE=3 SV=1	0.245896	0.0214738
tr|D5AUE6|D5AUE6_RHOCB	1	Glucose-1-phosphate adenylyltransferase OS=Rhodobacter capsulatus (strain ATCC BAA-309 / NBRC 16581 / SB1003) OX=272942 GN=glgC PE=3 SV=1	0.383609	0.0114595
tr|Q7M823|Q7M823_WOLSU	5	Glutamate dehydrogenase OS=Wolinella succinogenes (strain ATCC 29543 / DSM 1740 / LMG 7466 / NCTC 11488 / FDC 602W) OX=273121 GN=gdhA PE=3 SV=1	0.471344	0.0280561
tr|E6LHG5|E6LHG5_ENTI1	1	Glutamine synthetase OS=Enterococcus italicus (strain DSM 15952 / LMG 22039 / TP 1.5) OX=888064 GN=glnA PE=3 SV=1	0.11062	0.0434196
tr|A0A0Q0QM51|A0A0Q0QM51_RHOCA	2	Glutamine synthetase OS=Rhodobacter capsulatus OX=1061 GN=SAMN04244550_01569 PE=3 SV=1	3.22741	0.00850583
tr|Q7M7R9|Q7M7R9_WOLSU	14	GLUTAMINE SYNTHETASE OS=Wolinella succinogenes (strain ATCC 29543 / DSM 1740 / LMG 7466 / NCTC 11488 / FDC 602W) OX=273121 GN=GLNA PE=3 SV=1	0.57082	0.0285576
tr|Q3IYQ4|Q3IYQ4_RHOS4	1	Glutamine-pyruvate aminotransferase OS=Rhodobacter sphaeroides (strain ATCC 17023 / 2.4.1 / NCIB 8253 / DSM 158) OX=272943 GN=gltB PE=3 SV=1	7.19264	0.00768048
tr|A0A318THS6|A0A318THS6_9BRAD	1	Glutamyl-tRNA(Gln) amidotransferase subunit A OS=Rhodopseudomonas faecalis OX=99655 GN=gatA PE=3 SV=1	0.227937	0.00220609
tr|A0A318T6L8|A0A318T6L8_9BRAD	3	Glutaredoxin OS=Rhodopseudomonas faecalis OX=99655 GN=BJ122_1393 PE=3 SV=1	2.94553	0.0329372
tr|A0A330HB80|A0A330HB80_9RHOB	1	Glutathione-dependent disulfide-bond oxidoreductase OS=Rhodobacter johrii OX=445629 GN=DDV93_12060 PE=4 SV=1	3.80139	0.00281142
tr|A0A519F3Z7|A0A519F3Z7_9BURK	1	Glyceraldehyde-3-phosphate dehydrogenase (Fragment) OS=Rubrivivax sp. OX=50259 GN=gap PE=3 SV=1	3.66815	0.0116954
tr|A0A318TGE8|A0A318TGE8_9BRAD	5	Glyceraldehyde-3-phosphate dehydrogenase (NAD+) OS=Rhodopseudomonas faecalis OX=99655 GN=BJ122_10968 PE=3 SV=1	4.77006	0.00708706
tr|A0A1T4WVK5|A0A1T4WVK5_9DELT	1	Glyceraldehyde-3-phosphate dehydrogenase OS=Desulfovibrio gracilis DSM 16080 OX=1121449 GN=SAMN02745704_01384 PE=3 SV=1	0.228553	0.0178835
tr|A3PIN0|A3PIN0_RHOS1	1	Helicase domain protein OS=Rhodobacter sphaeroides (strain ATCC 17029 / ATH 2.4.9) OX=349101 GN=Rsph17029_1086 PE=4 SV=1	3.53648	0.00653094
tr|A0A318THF0|A0A318THF0_9BRAD	2	Hemerythrin-like domain-containing protein OS=Rhodopseudomonas faecalis OX=99655 GN=BJ122_11116 PE=4 SV=1	2.28227	0.00198407
tr|A0A7J0BI14|A0A7J0BI14_9DELT	1	Heterodisulfide reductase subunit A OS=Desulfovibrio sp. HN2 OX=2718620 GN=DSM101010T_12170 PE=4 SV=1	0.239931	0.0140165
tr|S7TJM2|S7TJM2_9DELT	1	Histidine kinase OS=Desulfovibrio sp. X2 OX=941449 GN=dsx2_0733 PE=4 SV=1	2.7487	0.00034351
tr|B8DQ68|B8DQ68_DESVM	1	Histidine kinase OS=Desulfovibrio vulgaris (strain Miyazaki F / DSM 19637) OX=883 GN=DvMF_1989 PE=4 SV=1	1.88164	0.0240037
tr|A0A330HG76|A0A330HG76_9RHOB	3	Hydroxyethylthiazole kinase OS=Rhodobacter johrii OX=445629 GN=thiM PE=3 SV=1	0.521815	0.00367187
tr|S4BE54|S4BE54_ENTCA	1	Inosine-5'-monophosphate dehydrogenase OS=Enterococcus casseliflavus 14-MB-W-14 OX=1259825 GN=guaB PE=3 SV=1	0.298122	0.0230654
tr|Q3J2F5|Q3J2F5_RHOS4	1	Inosine-5'-monophosphate dehydrogenase OS=Rhodobacter sphaeroides (strain ATCC 17023 / 2.4.1 / NCIB 8253 / DSM 158) OX=272943 GN=guaB PE=3 SV=1	2.86377	0.00963291
tr|A0A318TUS8|A0A318TUS8_9BRAD	5	Inosine-5'-monophosphate dehydrogenase OS=Rhodopseudomonas faecalis OX=99655 GN=guaB PE=3 SV=1	2.79761	0.014276
tr|A0A318TD85|A0A318TD85_9BRAD	2	Inositol-1-monophosphatase OS=Rhodopseudomonas faecalis OX=99655 GN=BJ122_10963 PE=3 SV=1	2.73076	0.00149112
tr|A0A318TGY2|A0A318TGY2_9BRAD	2	Invasion protein IalB OS=Rhodopseudomonas faecalis OX=99655 GN=BJ122_10530 PE=4 SV=1	3.8851	0.00732048
tr|A0A318TB01|A0A318TB01_9BRAD	12	Isocitrase OS=Rhodopseudomonas faecalis OX=99655 GN=BJ122_13313 PE=4 SV=1	2.9238	0.00870892
tr|Q218P8|Q218P8_RHOPB	1	Isocitrate dehydrogenase [NADP] OS=Rhodopseudomonas palustris (strain BisB18) OX=316056 GN=RPC_1576 PE=3 SV=1	4.95699	0.0153703
tr|A0A519G0W9|A0A519G0W9_9BURK	1	Isocitrate dehydrogenase [NADP] OS=Rubrivivax sp. OX=50259 GN=EOP38_18655 PE=4 SV=1	0.587979	0.0288669
tr|A0A318TCB9|A0A318TCB9_9BRAD	2	Isovaleryl-CoA dehydrogenase OS=Rhodopseudomonas faecalis OX=99655 GN=BJ122_13211 PE=3 SV=1	2.85897	0.0203044
tr|A0A6N8DQH5|A0A6N8DQH5_RHOAC	1	K(+)-insensitive pyrophosphate-energized proton pump OS=Rhodoblastus acidophilus OX=1074 GN=hppA PE=3 SV=1	6.0759	0.00377541
tr|A0A318TFU3|A0A318TFU3_9BRAD	2	K(+)-insensitive pyrophosphate-energized proton pump OS=Rhodopseudomonas faecalis OX=99655 GN=hppA PE=3 SV=1	1.85331	0.0498432
tr|A0A318THL9|A0A318THL9_9BRAD	3	Ketol-acid reductoisomerase (NADP(+)) OS=Rhodopseudomonas faecalis OX=99655 GN=ilvC PE=3 SV=1	4.83826	0.000471667
tr|T0VCY2|T0VCY2_9ENTE	1	L-arabinose-binding periplasmic proteinprecursorAraF OS=Enterococcus sp. HSIEG1 OX=1316414 GN=HSIEG1_2076 PE=4 SV=1	0.0773352	0.00808617
tr|A0A318TH77|A0A318TH77_9BRAD	1	Light-harvesting protein B-800-850 alpha chain OS=Rhodopseudomonas faecalis OX=99655 GN=BJ122_104191 PE=4 SV=1	2.51637	0.00403227
tr|A0A3D1U6V0|A0A3D1U6V0_9DELT	1	L-threonine dehydrogenase OS=Desulfovibrio sp. OX=885 GN=DEV75_01900 PE=4 SV=1	3.40599	0.038699
tr|A0A318TTT4|A0A318TTT4_9BRAD	1	LTXXQ motif family protein OS=Rhodopseudomonas faecalis OX=99655 GN=BJ122_10111 PE=3 SV=1	2.61386	0.0155003
tr|A0A318TMW8|A0A318TMW8_9BRAD	1	LuxR family two component transcriptional regulator OS=Rhodopseudomonas faecalis OX=99655 GN=BJ122_108145 PE=4 SV=1	2.14405	0.0324158
tr|A0A318TJR8|A0A318TJR8_9BRAD	6	Malate dehydrogenase OS=Rhodopseudomonas faecalis OX=99655 GN=mdh PE=3 SV=1	2.16969	0.00168635
tr|R2XWP7|R2XWP7_9ENTE	4	Malate dehydrogenase, decarboxylating OS=Enterococcus gilvus ATCC BAA-350 OX=1158614 GN=UKC_00139 PE=3 SV=1	0.37207	0.029537
tr|A0A318TAB1|A0A318TAB1_9BRAD	7	Malate synthase G OS=Rhodopseudomonas faecalis OX=99655 GN=glcB PE=3 SV=1	1.93187	0.0429649
tr|A0A7H0Y0T8|A0A7H0Y0T8_RHOCA	1	Malonyl CoA-acyl carrier protein transacylase OS=Rhodobacter capsulatus OX=1061 GN=fabD PE=3 SV=1	0.314136	0.023113
tr|Q7MAQ5|Q7MAQ5_WOLSU	2	METHYL-ACCEPTING CHEMOTAXIS PROTEIN II OS=Wolinella succinogenes (strain ATCC 29543 / DSM 1740 / LMG 7466 / NCTC 11488 / FDC 602W) OX=273121 GN=WS0094 PE=4 SV=1	0.508958	0.0257668
tr|A0A318TAZ7|A0A318TAZ7_9BRAD	2	Methylenetetrahydrofolate reductase OS=Rhodopseudomonas faecalis OX=99655 GN=BJ122_11866 PE=3 SV=1	5.52353	0.000393056
tr|A0A318TLR3|A0A318TLR3_9BRAD	5	Methylisocitrate lyase OS=Rhodopseudomonas faecalis OX=99655 GN=BJ122_101152 PE=3 SV=1	1.99175	0.0194489
tr|A0A318TNB8|A0A318TNB8_9BRAD	9	Methylmalonate-semialdehyde dehydrogenase [acylating] OS=Rhodopseudomonas faecalis OX=99655 GN=BJ122_101116 PE=4 SV=1	3.22538	0.0020694
tr|A0A521J8N3|A0A521J8N3_9CHLR	1	Methylmalonyl-CoA carboxyltransferase OS=Anaerolineaceae bacterium OX=2024896 GN=EWM47_12915 PE=4 SV=1	0.164222	0.0443413
tr|A0A318U0L4|A0A318U0L4_9BRAD	1	Methylmalonyl-CoA epimerase /ethylmalonyl-CoA epimerase OS=Rhodopseudomonas faecalis OX=99655 GN=BJ122_101202 PE=3 SV=1	3.30142	0.0164442
tr|A0A318TI54|A0A318TI54_9BRAD	7	Mg-protoporphyrin IX chelatase OS=Rhodopseudomonas faecalis OX=99655 GN=BJ122_11095 PE=3 SV=1	2.45972	0.00389276
tr|A0A318TDD0|A0A318TDD0_9BRAD	6	NAD(P) transhydrogenase alpha subunit OS=Rhodopseudomonas faecalis OX=99655 GN=BJ122_11183 PE=3 SV=1	2.22454	0.0188129
tr|A0A318TCD7|A0A318TCD7_9BRAD	2	NAD(P) transhydrogenase subunit beta OS=Rhodopseudomonas faecalis OX=99655 GN=BJ122_11181 PE=3 SV=1	2.36301	0.0280617
tr|A0A318TIZ5|A0A318TIZ5_9BRAD	1	NAD(P)-dependent dehydrogenase (Short-subunit alcohol dehydrogenase family) OS=Rhodopseudomonas faecalis OX=99655 GN=BJ122_10266 PE=4 SV=1	0.268913	0.011365
tr|A0A318TMM1|A0A318TMM1_9BRAD	1	NAD(P)-dependent dehydrogenase (Short-subunit alcohol dehydrogenase family) OS=Rhodopseudomonas faecalis OX=99655 GN=BJ122_10830 PE=3 SV=1	1.76113	0.0144532
tr|A0A0Q0QHC9|A0A0Q0QHC9_RHOCA	1	NAD(P)-dependent dehydrogenase, short-chain alcohol dehydrogenase family OS=Rhodobacter capsulatus OX=1061 GN=SAMN04244550_01019 PE=3 SV=1	3.71175	0.00265604
tr|A0A4U1JPV4|A0A4U1JPV4_RHOCA	2	NAD-dependent succinate-semialdehyde dehydrogenase OS=Rhodobacter capsulatus OX=1061 GN=FBT96_11435 PE=3 SV=1	1.8119	0.0154924
tr|A0A679IN63|A0A679IN63_9ENTE	1	NADH dehydrogenase OS=Enterococcus saigonensis OX=1805431 GN=EsVE80_25380 PE=4 SV=1	0.288666	0.0371022
tr|A0A318TVR0|A0A318TVR0_9BRAD	1	NADPH:quinone reductase-like Zn-dependent oxidoreductase OS=Rhodopseudomonas faecalis OX=99655 GN=BJ122_10536 PE=3 SV=1	2.16235	0.0497275
tr|A0A318TP00|A0A318TP00_9BRAD	1	Nicotinate-nucleotide--dimethylbenzimidazole phosphoribosyltransferase OS=Rhodopseudomonas faecalis OX=99655 GN=cobT PE=3 SV=1	3.93447	0.00300382
tr|Q7MR04|Q7MR04_WOLSU	3	Nitro_FeMo-Co domain-containing protein OS=Wolinella succinogenes (strain ATCC 29543 / DSM 1740 / LMG 7466 / NCTC 11488 / FDC 602W) OX=273121 GN=WS1855 PE=4 SV=1	0.16852	0.00264173
tr|B8DNY9|B8DNY9_DESVM	1	Nitrogen regulatory protein P-II OS=Desulfovibrio vulgaris (strain Miyazaki F / DSM 19637) OX=883 GN=DvMF_0865 PE=3 SV=1	0.398199	0.0127578
tr|Q3J1L6|Q3J1L6_RHOS4	1	Nitrogen regulatory protein P-II OS=Rhodobacter sphaeroides (strain ATCC 17023 / 2.4.1 / NCIB 8253 / DSM 158) OX=272943 GN=glnB PE=3 SV=1	0.272192	0.00263395
tr|A0A318TKM7|A0A318TKM7_9BRAD	3	Nitrogen regulatory protein P-II OS=Rhodopseudomonas faecalis OX=99655 GN=BJ122_101171 PE=3 SV=1	2.29693	0.00997242
sp|Q7M8U8|NIFH_WOLSU	2	Nitrogenase iron protein OS=Wolinella succinogenes (strain ATCC 29543 / DSM 1740 / LMG 7466 / NCTC 11488 / FDC 602W) OX=273121 GN=nifH PE=3 SV=1	0.402203	0.0227812
tr|A0A318TE09|A0A318TE09_9BRAD	2	Nucleoid DNA-binding protein OS=Rhodopseudomonas faecalis OX=99655 GN=BJ122_10836 PE=3 SV=1	2.29225	0.0248127
tr|A0A318TGN0|A0A318TGN0_9BRAD	1	Nucleoid-associated protein BJ122_109140 OS=Rhodopseudomonas faecalis OX=99655 GN=BJ122_109140 PE=3 SV=1	0.644284	0.0175868
tr|Q3J3P2|Q3J3P2_RHOS4	1	O-acetylhomoserine sulfhydrylase OS=Rhodobacter sphaeroides (strain ATCC 17023 / 2.4.1 / NCIB 8253 / DSM 158) OX=272943 GN=RSP_2431 PE=3 SV=1	0.230286	0.0278241
tr|A0A1L8R4B8|A0A1L8R4B8_9ENTE	2	Oligopeptide ABC transporter, binding protein OS=Enterococcus canintestini OX=317010 GN=RU96_GL000786 PE=4 SV=1	0.355292	0.00489947
tr|Q7M967|Q7M967_WOLSU	1	OLIGOPEPTIDE BINDING PROTEIN OS=Wolinella succinogenes (strain ATCC 29543 / DSM 1740 / LMG 7466 / NCTC 11488 / FDC 602W) OX=273121 GN=WS1160 PE=4 SV=1	0.336628	0.0230265
tr|X5NU67|X5NU67_ENTFL	1	Oligopeptide-binding protein oppA OS=Enterococcus faecalis CBRD01 OX=1400521 GN=P746_01746 PE=3 SV=1	0.252036	0.0124485
tr|A0A7H0XU39|A0A7H0XU39_RHOCA	3	OmpA family protein OS=Rhodobacter capsulatus OX=1061 GN=H9N28_12295 PE=4 SV=1	0.418199	0.00907642
tr|Q7MAB6|Q7MAB6_WOLSU	3	Outer membrane protein assembly factor BamA OS=Wolinella succinogenes (strain ATCC 29543 / DSM 1740 / LMG 7466 / NCTC 11488 / FDC 602W) OX=273121 GN=bamA PE=3 SV=1	0.434785	0.0129923
tr|A0A4U1K2W5|A0A4U1K2W5_RHOCA	1	Parvulin-like PPIase OS=Rhodobacter capsulatus OX=1061 GN=FBT96_00760 PE=3 SV=1	0.207746	0.0353253
tr|A0A318TI72|A0A318TI72_9BRAD	3	Parvulin-like PPIase OS=Rhodopseudomonas faecalis OX=99655 GN=BJ122_12175 PE=3 SV=1	2.17226	0.00626209
tr|A0A318TFD4|A0A318TFD4_9BRAD	1	PBP family phospholipid-binding protein OS=Rhodopseudomonas faecalis OX=99655 GN=BJ122_11630 PE=4 SV=1	3.65505	0.00123367
tr|A0A510WEE4|A0A510WEE4_ENTTH	1	Peptide ABC transporter substrate-binding protein OS=Enterococcus thailandicus OX=417368 GN=oppA PE=4 SV=1	0.103677	0.00759266
tr|G2HAJ1|G2HAJ1_9DELT	4	Peptidoglycan-associated protein OS=Desulfovibrio sp. A2 OX=298701 GN=pal PE=3 SV=1	0.536271	0.00177142
tr|Q7M7L2|Q7M7L2_WOLSU	7	Periplasmic serine endoprotease DegP-like OS=Wolinella succinogenes (strain ATCC 29543 / DSM 1740 / LMG 7466 / NCTC 11488 / FDC 602W) OX=273121 GN=HTRA PE=3 SV=1	0.462813	0.0121181
tr|A0A318TFD2|A0A318TFD2_9BRAD	3	Phasin OS=Rhodopseudomonas faecalis OX=99655 GN=BJ122_11157 PE=4 SV=1	4.19695	0.00742371
tr|A0A318TXK6|A0A318TXK6_9BRAD	1	Phenylacetate-coenzyme A ligase OS=Rhodopseudomonas faecalis OX=99655 GN=BJ122_10332 PE=3 SV=1	3.48681	0.00161887
tr|R2SCQ5|R2SCQ5_9ENTE	1	Phosphate acetyltransferase OS=Enterococcus asini ATCC 700915 OX=1158606 GN=UAS_00375 PE=3 SV=1	0.408873	0.0350282
tr|A0A366SKG9|A0A366SKG9_9ENTE	1	Phosphate acetyltransferase OS=Enterococcus cecorum OX=44008 GN=EB18_00405 PE=3 SV=1	0.367877	0.0146292
tr|A0A3D1J840|A0A3D1J840_ENTSX	2	Phosphate acetyltransferase OS=Enterococcus sp. OX=35783 GN=pta PE=3 SV=1	0.264367	0.00739363
tr|A0A318TJ74|A0A318TJ74_9BRAD	11	Phosphoenolpyruvate carboxykinase (ATP) OS=Rhodopseudomonas faecalis OX=99655 GN=pckA PE=3 SV=1	2.89494	0.00267626
tr|S0KH74|S0KH74_9ENTE	2	Phosphoglycerate kinase OS=Enterococcus dispar ATCC 51266 OX=1139219 GN=pgk PE=3 SV=1	0.372988	0.0157143
tr|T0VIH5|T0VIH5_9ENTE	1	Phosphoglycerate kinase OS=Enterococcus sp. HSIEG1 OX=1316414 GN=pgk PE=3 SV=1	0.216298	0.0117197
tr|A0A318TE67|A0A318TE67_9BRAD	4	Phosphoglycerate kinase OS=Rhodopseudomonas faecalis OX=99655 GN=pgk PE=3 SV=1	3.55526	0.0150626
tr|A0A318T820|A0A318T820_9BRAD	1	Phosphomethylpyrimidine synthase OS=Rhodopseudomonas faecalis OX=99655 GN=thiC PE=3 SV=1	0.295271	0.0114107
tr|A0A388SLL8|A0A388SLL8_9DELT	1	Phosphonate ABC transporter phosphate-binding periplasmic component OS=Desulfovibrio sp. HK-II OX=2009266 GN=RVX_2155 PE=4 SV=1	1.88295	0.0387413
tr|Q7M7P5|Q7M7P5_WOLSU	1	Phosphoribosylformylglycinamidine cyclo-ligase OS=Wolinella succinogenes (strain ATCC 29543 / DSM 1740 / LMG 7466 / NCTC 11488 / FDC 602W) OX=273121 GN=PURM PE=3 SV=1	0.419362	0.0296287
tr|D5ASS9|D5ASS9_RHOCB	1	Phosphoserine aminotransferase OS=Rhodobacter capsulatus (strain ATCC BAA-309 / NBRC 16581 / SB1003) OX=272942 GN=serC PE=4 SV=1	2.45361	0.0459588
tr|A0A318TBE3|A0A318TBE3_9BRAD	6	Phosphoserine aminotransferase OS=Rhodopseudomonas faecalis OX=99655 GN=BJ122_11513 PE=4 SV=1	2.42736	0.00188787
tr|A0A4V2SH73|A0A4V2SH73_RUBGE	1	Photosynthetic reaction center cytochrome c subunit OS=Rubrivivax gelatinosus OX=28068 GN=EV684_103165 PE=4 SV=1	0.0592191	0.0091994
tr|A0A318TD44|A0A318TD44_9BRAD	14	Photosynthetic reaction center H subunit OS=Rhodopseudomonas faecalis OX=99655 GN=BJ122_110138 PE=4 SV=1	2.74334	0.010097
tr|A0A0E2PGB4|A0A0E2PGB4_RHOCA	2	Phytoene dehydrogenase OS=Rhodobacter capsulatus Y262 OX=1415161 GN=U715_04590 PE=3 SV=1	2.37996	0.000946721
tr|A0A318T8W5|A0A318T8W5_9BRAD	3	Polyhydroxyalkanoate synthesis repressor PhaR OS=Rhodopseudomonas faecalis OX=99655 GN=BJ122_12151 PE=4 SV=1	2.48854	0.00161763
tr|A0A330H6K0|A0A330H6K0_9RHOB	1	Polymer-forming cytoskeletal protein OS=Rhodobacter johrii OX=445629 GN=DDV93_19400 PE=4 SV=1	2.06944	0.0058074
tr|A0A318TE72|A0A318TE72_9BRAD	12	Polyribonucleotide nucleotidyltransferase OS=Rhodopseudomonas faecalis OX=99655 GN=pnp PE=3 SV=1	2.46638	0.0179062
sp|P31075|PSRA_WOLSU	10	Polysulfide reductase chain A OS=Wolinella succinogenes (strain ATCC 29543 / DSM 1740 / LMG 7466 / NCTC 11488 / FDC 602W) OX=273121 GN=psrA PE=1 SV=1	0.722198	0.0296844
tr|A0A318TNY1|A0A318TNY1_9BRAD	2	Porin OS=Rhodopseudomonas faecalis OX=99655 GN=BJ122_10686 PE=3 SV=1	4.7932	0.0446783
tr|Q6N4P0|Q6N4P0_RHOPA	3	Possible branched-chain amino acid transport system substrate-binding protein OS=Rhodopseudomonas palustris (strain ATCC BAA-98 / CGA009) OX=258594 GN=RPA3297 PE=4 SV=1	0.387301	0.00389818
tr|Q7MSQ2|Q7MSQ2_WOLSU	2	PpiC domain-containing protein OS=Wolinella succinogenes (strain ATCC 29543 / DSM 1740 / LMG 7466 / NCTC 11488 / FDC 602W) OX=273121 GN=WS0233 PE=4 SV=1	0.433178	0.0313665
tr|A0A330HDW5|A0A330HDW5_9RHOB	1	Probable branched-chain-amino-acid aminotransferase OS=Rhodobacter johrii OX=445629 GN=DDV93_03755 PE=3 SV=1	0.47088	0.029633
tr|A0A318TGI7|A0A318TGI7_9BRAD	3	Probable transcriptional regulatory protein BJ122_10998 OS=Rhodopseudomonas faecalis OX=99655 GN=BJ122_10998 PE=3 SV=1	1.91058	0.00440745
tr|A0A318TUG1|A0A318TUG1_9BRAD	6	Propionyl-CoA carboxylase carboxyltransferase subunit OS=Rhodopseudomonas faecalis OX=99655 GN=BJ122_10711 PE=4 SV=1	1.62799	0.00427188
tr|Q3J648|Q3J648_RHOS4	2	Propionyl-CoA synthetase OS=Rhodobacter sphaeroides (strain ATCC 17023 / 2.4.1 / NCIB 8253 / DSM 158) OX=272943 GN=acsA PE=3 SV=2	0.519012	0.0170302
tr|Q7M8B9|Q7M8B9_WOLSU	4	PROTEIN DISULPHIDE ISOMERASE OS=Wolinella succinogenes (strain ATCC 29543 / DSM 1740 / LMG 7466 / NCTC 11488 / FDC 602W) OX=273121 GN=WS1747 PE=4 SV=1	0.601473	0.0060113
tr|A0A318TCA3|A0A318TCA3_9BRAD	3	Protein GrpE OS=Rhodopseudomonas faecalis OX=99655 GN=grpE PE=3 SV=1	1.61144	0.0430692
tr|A0A318T9C4|A0A318T9C4_9BRAD	7	Protein HflK OS=Rhodopseudomonas faecalis OX=99655 GN=BJ122_12310 PE=3 SV=1	2.53883	0.00871766
tr|A0A318T800|A0A318T800_9BRAD	2	Protein RecA OS=Rhodopseudomonas faecalis OX=99655 GN=recA PE=3 SV=1	3.35443	0.00347123
tr|I6RZS2|I6RZS2_ENTHA	1	Purine nucleoside phosphorylase DeoD-type OS=Enterococcus hirae (strain ATCC 9790 / DSM 20160 / JCM 8729 / LMG 6399 / NBRC 3181 / NCIMB 6459 / NCDO 1258) OX=768486 GN=deoD PE=3 SV=1	0.319412	0.0485422
tr|Q7M876|Q7M876_WOLSU	3	PUTATIVE ACYL-CoA DEHYDROGENASE OS=Wolinella succinogenes (strain ATCC 29543 / DSM 1740 / LMG 7466 / NCTC 11488 / FDC 602W) OX=273121 GN=FADE16 PE=3 SV=1	0.57134	0.0474841
tr|Q9Z4J3|Q9Z4J3_WOLSC	9	Putative C4-dicarboxylate-binding periplasmic protein OS=Wolinella succinogenes OX=844 GN=dctP PE=4 SV=1	0.535476	0.00453615
tr|A0A318T867|A0A318T867_9BRAD	1	Putative DNA-binding ribbon-helix-helix protein OS=Rhodopseudomonas faecalis OX=99655 GN=BJ122_12319 PE=4 SV=1	3.56553	0.00576651
tr|Q7M9R6|Q7M9R6_WOLSU	4	PUTATIVE FERREDOXIN OS=Wolinella succinogenes (strain ATCC 29543 / DSM 1740 / LMG 7466 / NCTC 11488 / FDC 602W) OX=273121 GN=WS0730 PE=4 SV=1	0.635912	0.00805438
tr|A0A318TDP3|A0A318TDP3_9BRAD	1	Putative membrane-anchored protein OS=Rhodopseudomonas faecalis OX=99655 GN=BJ122_11093 PE=4 SV=1	0.103804	0.0221393
tr|Q7MAF8|Q7MAF8_WOLSU	2	PUTATIVE METHYL-ACCEPTING CHEMOTAXIS PROTEIN OS=Wolinella succinogenes (strain ATCC 29543 / DSM 1740 / LMG 7466 / NCTC 11488 / FDC 602W) OX=273121 GN=WS0281 PE=4 SV=1	0.552722	0.0289254
tr|A0A6V8LWB5|A0A6V8LWB5_9DELT	1	Putative oxidoreductase YdhV OS=Desulfovibrio sp. FSS-1 OX=2730080 GN=ydhV_4 PE=3 SV=1	0.398216	0.0268276
tr|A0A7H0XTV9|A0A7H0XTV9_RHOCA	1	Pyruvate carboxylase OS=Rhodobacter capsulatus OX=1061 GN=H9N28_11845 PE=4 SV=1	2.09977	0.0485082
tr|A0A318TNP4|A0A318TNP4_9BRAD	1	Pyruvate dehydrogenase E1 component subunit beta OS=Rhodopseudomonas faecalis OX=99655 GN=BJ122_101260 PE=4 SV=1	2.3431	0.00867557
tr|R2Q2D6|R2Q2D6_9ENTE	1	Pyruvate kinase OS=Enterococcus asini ATCC 700915 OX=1158606 GN=UAS_00588 PE=3 SV=1	0.114272	0.00662767
tr|A0A318TQ69|A0A318TQ69_9BRAD	8	Pyruvate, orthophosphate dikinase OS=Rhodopseudomonas faecalis OX=99655 GN=BJ122_10463 PE=3 SV=1	1.89395	0.00094312
tr|B8DMG0|B8DMG0_DESVM	3	Pyruvate:ferredoxin oxidoreductase OS=Desulfovibrio vulgaris (strain Miyazaki F / DSM 19637) OX=883 GN=DvMF_1860 PE=3 SV=1	0.375371	0.0372952
tr|A0A318TBT0|A0A318TBT0_9BRAD	4	Response regulator receiver domain-containing protein OS=Rhodopseudomonas faecalis OX=99655 GN=BJ122_11577 PE=4 SV=1	3.04863	0.00466529
tr|Q7MS84|Q7MS84_WOLSU	1	RHH_1 domain-containing protein OS=Wolinella succinogenes (strain ATCC 29543 / DSM 1740 / LMG 7466 / NCTC 11488 / FDC 602W) OX=273121 GN=WS0673 PE=4 SV=1	0.50321	0.010475
tr|A0A1L8TQP6|A0A1L8TQP6_9ENTE	1	Ribosomal protein S1 OS=Enterococcus hermanniensis OX=249189 GN=RV04_GL001069 PE=4 SV=1	0.356881	0.00676369
tr|D5AKP1|D5AKP1_RHOCB	3	Ribosome hibernation promoting factor OS=Rhodobacter capsulatus (strain ATCC BAA-309 / NBRC 16581 / SB1003) OX=272942 GN=hpf PE=3 SV=1	0.515619	0.031932
tr|A0A318TCN1|A0A318TCN1_9BRAD	1	Ribosome hibernation promoting factor OS=Rhodopseudomonas faecalis OX=99655 GN=hpf PE=3 SV=1	2.78761	0.00155125
tr|A0A4V0WP62|A0A4V0WP62_9ENTE	2	Ribosome-recycling factor OS=Enterococcus florum OX=2480627 GN=frr PE=3 SV=1	0.516057	0.0171999
tr|A0A318TKX9|A0A318TKX9_9BRAD	4	Ribosome-recycling factor OS=Rhodopseudomonas faecalis OX=99655 GN=frr PE=3 SV=1	2.07723	0.00405959
tr|A0A318TVC6|A0A318TVC6_9BRAD	7	Ribulose bisphosphate carboxylase OS=Rhodopseudomonas faecalis OX=99655 GN=cbbM PE=3 SV=1	3.24126	0.00969405
tr|A0A318TTB8|A0A318TTB8_9BRAD	7	RND family efflux transporter MFP subunit OS=Rhodopseudomonas faecalis OX=99655 GN=BJ122_10930 PE=3 SV=1	1.85868	0.0148332
tr|A0A318TCQ0|A0A318TCQ0_9BRAD	3	S1 motif domain-containing protein OS=Rhodopseudomonas faecalis OX=99655 GN=BJ122_11267 PE=4 SV=1	0.756397	0.0206049
tr|A0A318T8K1|A0A318T8K1_9BRAD	4	S-adenosylmethionine synthase OS=Rhodopseudomonas faecalis OX=99655 GN=metK PE=3 SV=1	2.34268	0.00464089
tr|I0HLG7|I0HLG7_RUBGI	1	S-adenosylmethionine synthase OS=Rubrivivax gelatinosus (strain NBRC 100245 / IL144) OX=983917 GN=metK PE=3 SV=1	0.27273	0.0287312
tr|A0A242H0Y4|A0A242H0Y4_9ENTE	1	SAVED domain-containing protein OS=Enterococcus sp. 12C11_DIV0727 OX=1834167 GN=A5866_001091 PE=4 SV=1	3.3799	0.000663652
tr|A0A318TL35|A0A318TL35_9BRAD	1	Sec-independent protein translocase protein TatA OS=Rhodopseudomonas faecalis OX=99655 GN=tatA PE=3 SV=1	2.81509	0.0217111
tr|A0A318TMH5|A0A318TMH5_9BRAD	8	Secreted protein OS=Rhodopseudomonas faecalis OX=99655 GN=BJ122_102293 PE=3 SV=1	2.29788	0.00431411
tr|T2GBM7|T2GBM7_DESGG	1	Serine hydroxymethyltransferase OS=Desulfovibrio gigas (strain ATCC 19364 / DSM 1382 / NCIMB 9332 / VKM B-1759) OX=1121448 GN=glyA PE=3 SV=1	5.70993	0.00123209
tr|A0A318TI86|A0A318TI86_9BRAD	14	Short chain enoyl-CoA hydratase /3-hydroxyacyl-CoA dehydrogenase OS=Rhodopseudomonas faecalis OX=99655 GN=BJ122_103227 PE=3 SV=1	2.1287	0.0193939
tr|E6VHT1|E6VHT1_RHOPX	1	Short-chain dehydrogenase/reductase SDR OS=Rhodopseudomonas palustris (strain DX-1) OX=652103 GN=Rpdx1_3819 PE=3 SV=1	0.269758	0.00869654
tr|A0A318TFD5|A0A318TFD5_9BRAD	5	Single cache domain-containing protein OS=Rhodopseudomonas faecalis OX=99655 GN=BJ122_10790 PE=4 SV=1	3.97962	0.00581509
tr|A0A318TKY8|A0A318TKY8_9BRAD	4	Starvation-inducible DNA-binding protein OS=Rhodopseudomonas faecalis OX=99655 GN=BJ122_103151 PE=3 SV=1	2.04424	0.0421958
tr|A0A318T8H9|A0A318T8H9_9BRAD	5	Succinate dehydrogenase flavoprotein subunit OS=Rhodopseudomonas faecalis OX=99655 GN=BJ122_12268 PE=3 SV=1	2.6328	0.0186518
tr|A0A318TC46|A0A318TC46_9BRAD	3	Succinate--CoA ligase [ADP-forming] subunit alpha OS=Rhodopseudomonas faecalis OX=99655 GN=sucD PE=3 SV=1	3.60478	0.00326817
tr|Q07UX7|Q07UX7_RHOP5	1	Succinate--CoA ligase [ADP-forming] subunit alpha OS=Rhodopseudomonas palustris (strain BisA53) OX=316055 GN=sucD PE=3 SV=1	2.16726	0.0218354
tr|A0A318TBR7|A0A318TBR7_9BRAD	6	Succinate--CoA ligase [ADP-forming] subunit beta OS=Rhodopseudomonas faecalis OX=99655 GN=sucC PE=3 SV=1	2.55901	0.00364494
tr|A0A323UD73|A0A323UD73_RHOPL	1	Succinate--CoA ligase [ADP-forming] subunit beta OS=Rhodopseudomonas palustris OX=1076 GN=sucC PE=3 SV=1	1.99252	0.00400351
tr|A0A318TAC0|A0A318TAC0_9BRAD	2	Sulfur dehydrogenase subunit SoxC OS=Rhodopseudomonas faecalis OX=99655 GN=BJ122_11643 PE=4 SV=1	2.47065	0.0313996
tr|Q7MST0|Q7MST0_WOLSU	2	SurA_N domain-containing protein OS=Wolinella succinogenes (strain ATCC 29543 / DSM 1740 / LMG 7466 / NCTC 11488 / FDC 602W) OX=273121 GN=WS0160 PE=4 SV=1	0.563547	0.0235266
tr|A0A7H0XV00|A0A7H0XV00_RHOCA	3	Thiamine-phosphate synthase OS=Rhodobacter capsulatus OX=1061 GN=thiE PE=3 SV=1	1.70012	0.00548299
tr|A0A3G6W8W9|A0A3G6W8W9_RHOSH	1	Thiamine-phosphate synthase OS=Rhodobacter sphaeroides OX=1063 GN=thiE PE=3 SV=1	2.22397	0.0107569
tr|Q7M8K4|Q7M8K4_WOLSU	4	Thiol peroxidase OS=Wolinella succinogenes (strain ATCC 29543 / DSM 1740 / LMG 7466 / NCTC 11488 / FDC 602W) OX=273121 GN=tpx PE=3 SV=1	0.729461	0.0434368
tr|Q3J242|Q3J242_RHOS4	2	Thioredoxin domain-containing protein OS=Rhodobacter sphaeroides (strain ATCC 17023 / 2.4.1 / NCIB 8253 / DSM 158) OX=272943 GN=RSP_2981 PE=3 SV=1	1.29323	0.0376014
tr|A0A318TBN8|A0A318TBN8_9BRAD	4	Thioredoxin OS=Rhodopseudomonas faecalis OX=99655 GN=BJ122_11273 PE=3 SV=1	0.322761	0.000138376
tr|Q7M9S6|Q7M9S6_WOLSU	28	THIOSULFATE REDUCTASE OS=Wolinella succinogenes (strain ATCC 29543 / DSM 1740 / LMG 7466 / NCTC 11488 / FDC 602W) OX=273121 GN=fdhA PE=3 SV=1	0.583563	0.0228577
tr|A0A318U0B4|A0A318U0B4_9BRAD	2	Threonine--tRNA ligase OS=Rhodopseudomonas faecalis OX=99655 GN=thrS PE=3 SV=1	0.259748	0.0188282
sp|Q7MA16|TOLB_WOLSU	5	Tol-Pal system protein TolB OS=Wolinella succinogenes (strain ATCC 29543 / DSM 1740 / LMG 7466 / NCTC 11488 / FDC 602W) OX=273121 GN=tolB PE=3 SV=1	0.328058	0.00734919
tr|Q8EEB8|Q8EEB8_SHEON	1	TonB-dependent receptor OS=Shewanella oneidensis (strain MR-1) OX=211586 GN=SO_2469 PE=3 SV=1	0.146475	0.04217
tr|A0A318TD33|A0A318TD33_9BRAD	4	Transcription elongation factor GreA OS=Rhodopseudomonas faecalis OX=99655 GN=greA PE=3 SV=1	2.13133	0.00467224
tr|A0A318T8L6|A0A318T8L6_9BRAD	8	Transcription termination/antitermination protein NusA OS=Rhodopseudomonas faecalis OX=99655 GN=nusA PE=3 SV=1	2.1623	0.0270647
tr|A0A318T9C6|A0A318T9C6_9BRAD	3	Transcription termination/antitermination protein NusG OS=Rhodopseudomonas faecalis OX=99655 GN=nusG PE=3 SV=1	3.14061	0.00572203
tr|A3PG55|A3PG55_RHOS1	1	Transcriptional regulator, IclR family OS=Rhodobacter sphaeroides (strain ATCC 17029 / ATH 2.4.9) OX=349101 GN=Rsph17029_0202 PE=4 SV=1	0.197213	0.00478804
tr|A0A7H0Y174|A0A7H0Y174_RHOCA	4	Transketolase OS=Rhodobacter capsulatus OX=1061 GN=tkt PE=3 SV=1	1.3678	0.00958197
tr|A0A318TFE9|A0A318TFE9_9BRAD	4	Transketolase OS=Rhodopseudomonas faecalis OX=99655 GN=BJ122_106136 PE=3 SV=1	1.83938	0.0474736
tr|E6VK34|E6VK34_RHOPX	1	Translation initiation factor IF-1 OS=Rhodopseudomonas palustris (strain DX-1) OX=652103 GN=infA PE=3 SV=1	2.19774	0.00800647
tr|A0A7H0XXA7|A0A7H0XXA7_RHOCA	2	Translation initiation factor IF-2 OS=Rhodobacter capsulatus OX=1061 GN=infB PE=3 SV=1	3.47313	0.012381
tr|A0A318T9T6|A0A318T9T6_9BRAD	11	Translation initiation factor IF-2 OS=Rhodopseudomonas faecalis OX=99655 GN=infB PE=3 SV=1	1.83762	0.0325791
tr|G2H5T1|G2H5T1_9DELT	1	Translation initiation factor IF-3 OS=Desulfovibrio sp. A2 OX=298701 GN=infC PE=3 SV=1	0.411028	0.00645062
tr|A0A6M1MI60|A0A6M1MI60_9RHOB	1	Transporter OS=Rhodobacter sp. SGA-6-6 OX=2710882 GN=G5B31_08065 PE=4 SV=1	2.533	0.029005
tr|E6VCW3|E6VCW3_RHOPX	1	TRAP dicarboxylate transporter, DctP subunit OS=Rhodopseudomonas palustris (strain DX-1) OX=652103 GN=Rpdx1_3462 PE=3 SV=1	0.424274	0.0363075
tr|A0A318TLB3|A0A318TLB3_9BRAD	12	Trigger factor OS=Rhodopseudomonas faecalis OX=99655 GN=tig PE=3 SV=1	1.88225	0.00153128
tr|A0A2I0DWI5|A0A2I0DWI5_9GAMM	1	Trigger factor OS=Shewanella sp. GutDb-MelDb OX=2058316 GN=tig PE=3 SV=1	3.14732	0.0141609
sp|Q7M7M4|TIG_WOLSU	9	Trigger factor OS=Wolinella succinogenes (strain ATCC 29543 / DSM 1740 / LMG 7466 / NCTC 11488 / FDC 602W) OX=273121 GN=tig PE=3 SV=1	0.68685	0.000848642
tr|A0A318TC39|A0A318TC39_9BRAD	6	Tripartite-type tricarboxylate transporter receptor subunit TctC OS=Rhodopseudomonas faecalis OX=99655 GN=BJ122_111102 PE=3 SV=1	2.32067	0.0470289
tr|A0A1L8TPZ3|A0A1L8TPZ3_9ENTE	1	Tryptophan synthase alpha chain OS=Enterococcus hermanniensis OX=249189 GN=trpA PE=3 SV=1	0.327074	0.00057824
tr|A0A318TNC7|A0A318TNC7_9BRAD	3	Tryptophan synthase beta chain OS=Rhodopseudomonas faecalis OX=99655 GN=trpB PE=3 SV=1	2.03115	0.0222786
tr|A0A318T9X4|A0A318T9X4_9BRAD	1	Tryptophan--tRNA ligase OS=Rhodopseudomonas faecalis OX=99655 GN=trpS PE=3 SV=1	1.56018	0.024389
tr|Q2J2Y6|Q2J2Y6_RHOP2	4	Two component transcriptional regulator, winged helix family OS=Rhodopseudomonas palustris (strain HaA2) OX=316058 GN=RPB_0463 PE=4 SV=1	1.91724	0.0458574
tr|A0A318TNV0|A0A318TNV0_9BRAD	8	Tyrosine--tRNA ligase OS=Rhodopseudomonas faecalis OX=99655 GN=tyrS PE=3 SV=1	1.51503	0.00996448
tr|A0A318TR75|A0A318TR75_9BRAD	2	Ubiquinol-cytochrome c reductase iron-sulfur subunit OS=Rhodopseudomonas faecalis OX=99655 GN=BJ122_10358 PE=3 SV=1	1.63908	0.0230869
tr|A0A318TDW0|A0A318TDW0_9BRAD	4	Ubiquinone biosynthesis protein UbiU OS=Rhodopseudomonas faecalis OX=99655 GN=ubiU PE=3 SV=1	1.34562	0.0231883
tr|A0A1G7E9F0|A0A1G7E9F0_RHOCA	1	Uncharacterized conserved protein OS=Rhodobacter capsulatus OX=1061 GN=SAMN04244550_00696 PE=4 SV=1	3.6861	7.51436e-05
tr|A0A318TA03|A0A318TA03_9BRAD	3	Uncharacterized protein DUF2147 OS=Rhodopseudomonas faecalis OX=99655 GN=BJ122_12017 PE=4 SV=1	2.09613	0.0191135
tr|S1NVI0|S1NVI0_9ENTE	2	Uncharacterized protein OS=Enterococcus dispar ATCC 51266 OX=1139219 GN=OMK_01011 PE=4 SV=1	0.349009	0.00258268
tr|A0A366UKK1|A0A366UKK1_ENTHR	1	Uncharacterized protein OS=Enterococcus hirae OX=1354 GN=EB10_00793 PE=4 SV=1	3.5965	0.000881434
tr|A0A242L279|A0A242L279_ENTMU	1	Uncharacterized protein OS=Enterococcus mundtii OX=53346 GN=A5802_001448 PE=4 SV=1	0.257881	0.0305362
tr|A0A0Q0QUG3|A0A0Q0QUG3_RHOCA	4	Uncharacterized protein OS=Rhodobacter capsulatus OX=1061 GN=SAMN04244550_03118 PE=4 SV=1	3.52205	0.0119452
tr|A0A1G7RRD8|A0A1G7RRD8_RHOCA	4	Uncharacterized protein OS=Rhodobacter capsulatus OX=1061 GN=SAMN04244550_03476 PE=4 SV=1	2.91865	0.0327915
tr|Q3J5L7|Q3J5L7_RHOS4	3	Uncharacterized protein OS=Rhodobacter sphaeroides (strain ATCC 17023 / 2.4.1 / NCIB 8253 / DSM 158) OX=272943 GN=RSP_1770 PE=4 SV=1	2.37963	0.000181463
tr|A0A318U0I7|A0A318U0I7_9BRAD	4	Uncharacterized protein OS=Rhodopseudomonas faecalis OX=99655 GN=BJ122_101169 PE=4 SV=1	1.75124	0.0142784
tr|A0A318TKA4|A0A318TKA4_9BRAD	1	Uncharacterized protein OS=Rhodopseudomonas faecalis OX=99655 GN=BJ122_10288 PE=4 SV=1	2.55012	0.000705831
tr|A0A318TWX7|A0A318TWX7_9BRAD	2	Uncharacterized protein OS=Rhodopseudomonas faecalis OX=99655 GN=BJ122_10497 PE=4 SV=1	1.94505	0.0279763
tr|A0A318TT93|A0A318TT93_9BRAD	1	Uncharacterized protein OS=Rhodopseudomonas faecalis OX=99655 GN=BJ122_1099 PE=4 SV=1	2.77102	0.0349995
tr|A0A318TI44|A0A318TI44_9BRAD	6	Uncharacterized protein OS=Rhodopseudomonas faecalis OX=99655 GN=BJ122_11085 PE=4 SV=1	2.20349	0.0326041
tr|A0A318TAL9|A0A318TAL9_9BRAD	3	Uncharacterized protein OS=Rhodopseudomonas faecalis OX=99655 GN=BJ122_11530 PE=4 SV=1	1.9268	0.00657248
tr|A0A318TAQ2|A0A318TAQ2_9BRAD	2	Uncharacterized protein OS=Rhodopseudomonas faecalis OX=99655 GN=BJ122_11572 PE=4 SV=1	2.61516	0.0130521
tr|A0A318TEH7|A0A318TEH7_9BRAD	2	Uncharacterized protein OS=Rhodopseudomonas faecalis OX=99655 GN=BJ122_12061 PE=4 SV=1	0.355356	0.00411594
tr|A0A318TD90|A0A318TD90_9BRAD	1	Uncharacterized protein OS=Rhodopseudomonas faecalis OX=99655 GN=BJ122_1241 PE=4 SV=1	3.32491	0.0120142
tr|A0A318T8W4|A0A318T8W4_9BRAD	1	Uncharacterized protein OS=Rhodopseudomonas faecalis OX=99655 GN=BJ122_12747 PE=4 SV=1	6.64643	0.0236655
tr|A0A318TB31|A0A318TB31_9BRAD	1	Uncharacterized protein OS=Rhodopseudomonas faecalis OX=99655 GN=BJ122_1317 PE=4 SV=1	2.8852	0.00164516
tr|A0A318TAD2|A0A318TAD2_9BRAD	3	Uncharacterized protein OS=Rhodopseudomonas faecalis OX=99655 GN=BJ122_1602 PE=4 SV=1	2.69422	0.000132611
tr|E6VF67|E6VF67_RHOPX	1	Uncharacterized protein OS=Rhodopseudomonas palustris (strain DX-1) OX=652103 GN=Rpdx1_0093 PE=4 SV=1	0.32196	0.0274317
tr|A0A0D7EG92|A0A0D7EG92_RHOPL	1	Uncharacterized protein OS=Rhodopseudomonas palustris OX=1076 GN=OO17_20155 PE=4 SV=1	1.9392	0.0276842
tr|A0A519GCG9|A0A519GCG9_9BURK	1	Uncharacterized protein OS=Rubrivivax sp. OX=50259 GN=EOP38_04265 PE=4 SV=1	2.69459	0.00988079
tr|A0A106C0A3|A0A106C0A3_SHEFR	1	Uncharacterized protein OS=Shewanella frigidimarina OX=56812 GN=AWJ07_04685 PE=4 SV=1	0.662653	0.0236097
tr|Q7MSR7|Q7MSR7_WOLSU	3	Uncharacterized protein OS=Wolinella succinogenes (strain ATCC 29543 / DSM 1740 / LMG 7466 / NCTC 11488 / FDC 602W) OX=273121 GN=WS0189 PE=4 SV=1	0.665347	0.0394619
tr|Q7MSN0|Q7MSN0_WOLSU	5	Uncharacterized protein OS=Wolinella succinogenes (strain ATCC 29543 / DSM 1740 / LMG 7466 / NCTC 11488 / FDC 602W) OX=273121 GN=WS0286 PE=4 SV=1	0.555175	0.0352597
tr|Q7MSE7|Q7MSE7_WOLSU	2	Uncharacterized protein OS=Wolinella succinogenes (strain ATCC 29543 / DSM 1740 / LMG 7466 / NCTC 11488 / FDC 602W) OX=273121 GN=WS0532 PE=4 SV=1	0.213888	0.0129929
tr|Q7MS73|Q7MS73_WOLSU	1	Uncharacterized protein OS=Wolinella succinogenes (strain ATCC 29543 / DSM 1740 / LMG 7466 / NCTC 11488 / FDC 602W) OX=273121 GN=WS0695 PE=4 SV=1	0.365139	0.018786
tr|Q7MRG8|Q7MRG8_WOLSU	4	Uncharacterized protein OS=Wolinella succinogenes (strain ATCC 29543 / DSM 1740 / LMG 7466 / NCTC 11488 / FDC 602W) OX=273121 GN=WS1373 PE=4 SV=1	0.500746	0.0175678
tr|B8DP29|B8DP29_DESVM	2	Universal stress protein OS=Desulfovibrio vulgaris (strain Miyazaki F / DSM 19637) OX=883 GN=DvMF_0906 PE=3 SV=1	1.62954	0.033255
tr|A0A6B1T2L1|A0A6B1T2L1_ENTAV	1	UPF0340 protein GT585_11170 OS=Enterococcus avium OX=33945 GN=GT585_11170 PE=3 SV=1	0.310402	0.0422563
tr|A0A318TDD9|A0A318TDD9_9BRAD	6	Uroporphyrinogen decarboxylase OS=Rhodopseudomonas faecalis OX=99655 GN=hemE PE=3 SV=1	3.48392	0.00401635
tr|Q79HR6|Q79HR6_WOLSU	1	Usp domain-containing protein OS=Wolinella succinogenes (strain ATCC 29543 / DSM 1740 / LMG 7466 / NCTC 11488 / FDC 602W) OX=273121 GN=WS0834 PE=3 SV=1	0.362343	0.034759
tr|D5ARP3|D5ARP3_RHOCB	1	UspA domain protein OS=Rhodobacter capsulatus (strain ATCC BAA-309 / NBRC 16581 / SB1003) OX=272942 GN=RCAP_rcc01156 PE=3 SV=1	2.95266	0.000535676
tr|A0A0Q0ZZ02|A0A0Q0ZZ02_RHOCA	1	UTP--glucose-1-phosphate uridylyltransferase OS=Rhodobacter capsulatus OX=1061 GN=SAMN04244550_00845 PE=3 SV=1	3.13921	0.0034822
tr|A0A388SJP0|A0A388SJP0_9DELT	2	Xanthine dehydrogenase iron-sulfur subunit OS=Desulfovibrio sp. HK-II OX=2009266 GN=RVX_0689 PE=3 SV=1	4.9674	0.0306028
tr|Q3HKD8|Q3HKD8_RHOS4	1	YD repeat protein OS=Rhodobacter sphaeroides (strain ATCC 17023 / 2.4.1 / NCIB 8253 / DSM 158) OX=272943 GN=RSP_4284 PE=4 SV=1	0.437839	0.0357089
tr|B8DQH1|B8DQH1_DESVM	2	Zinc resistance-associated protein OS=Desulfovibrio vulgaris (strain Miyazaki F / DSM 19637) OX=883 GN=DvMF_2147 PE=4 SV=1	0.175533	0.0114476
